# Supplementary material for: Profiles of Long Non-Coding RNAs and mRNA Expression in Human Macrophages Regulated by Interleukin-27
Source: MDPI journal article supplement (doi:10.3390/ijms20246207), 2019-12-09
Supplement: s1 [file s1]

Archive with 6 entries (6 files):
- ijms-663677-supplementary.pdf
- Table S1.xlsx
- Table S2.xlsx
- Table S3.xlsx
- Table S4.xlsx
- Table S5.xlsx
