# Supplementary material for: Profiles of Long Non-Coding RNAs and mRNA Expression in Human Macrophages Regulated by Interleukin-27
Source: MDPI journal article supplement (doi:10.3390/ijms20246207), 2019-12-09
Supplement: s1 [file s1 › ijms-663677-supplementary.pdf]

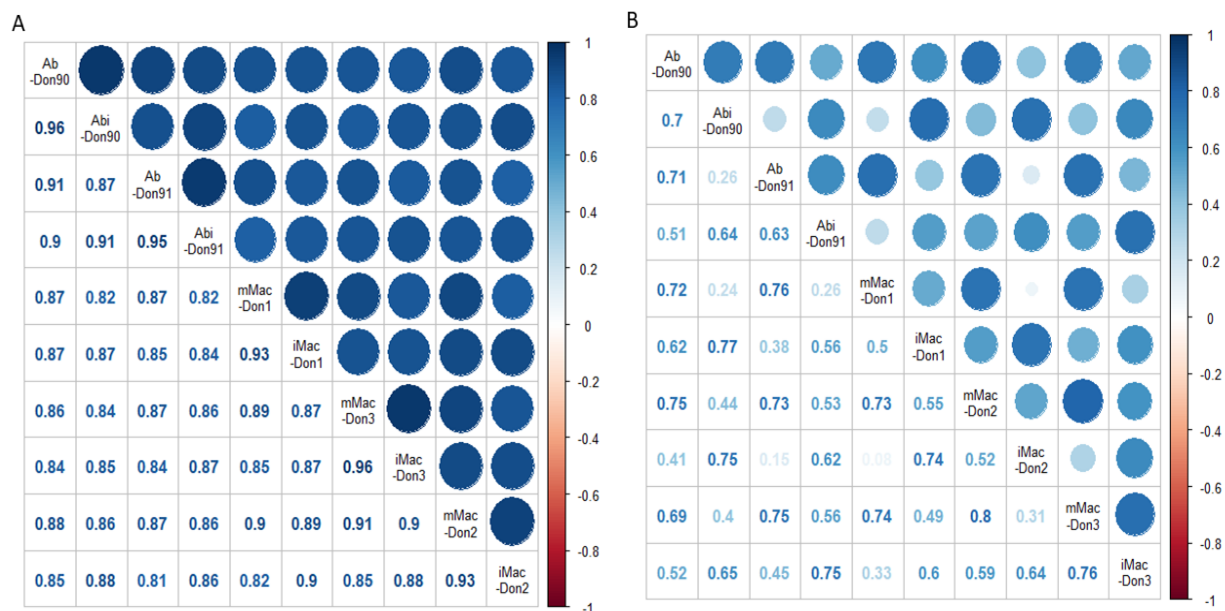

**Supplementary Figure S1.** Sample paired-wise correlations. A. using all genes. B. using 434 significant genes. The numbers are Pearson correlation coefficients. Circle size and color indicate correlation levels.

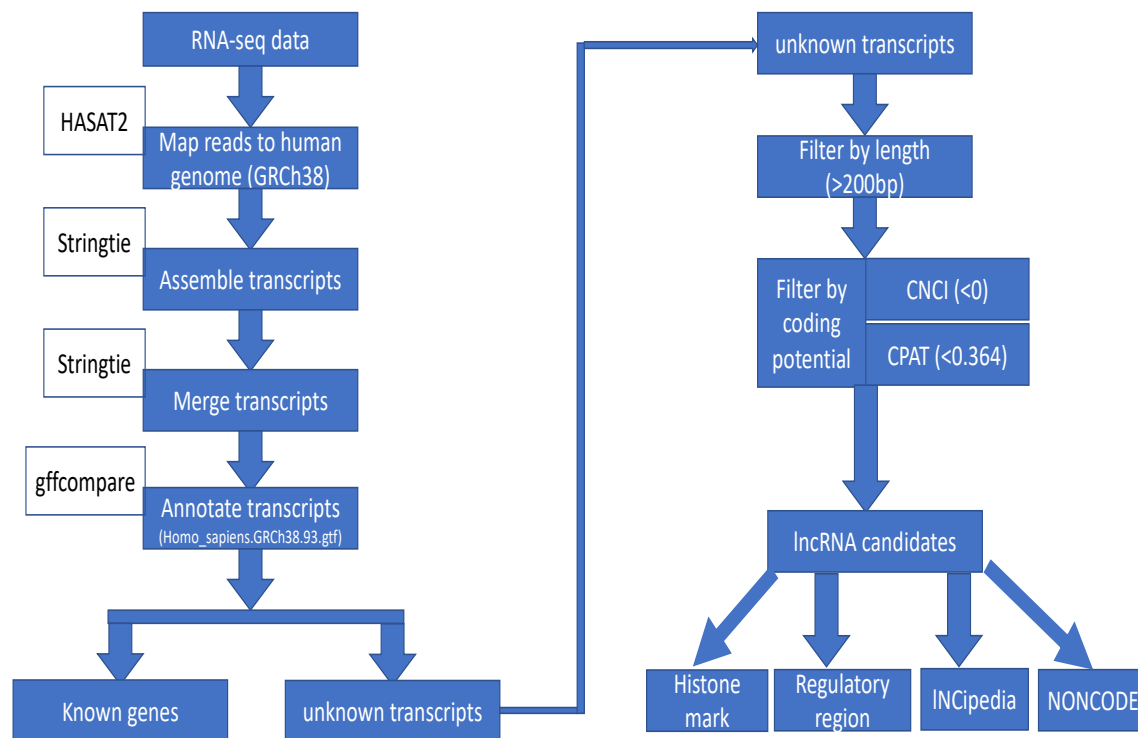

**Supplementary Figure S2.** Pipeline for selecting lncRNAs. A schematic overview of the pipeline employed for selecting candidate lncRNAs.

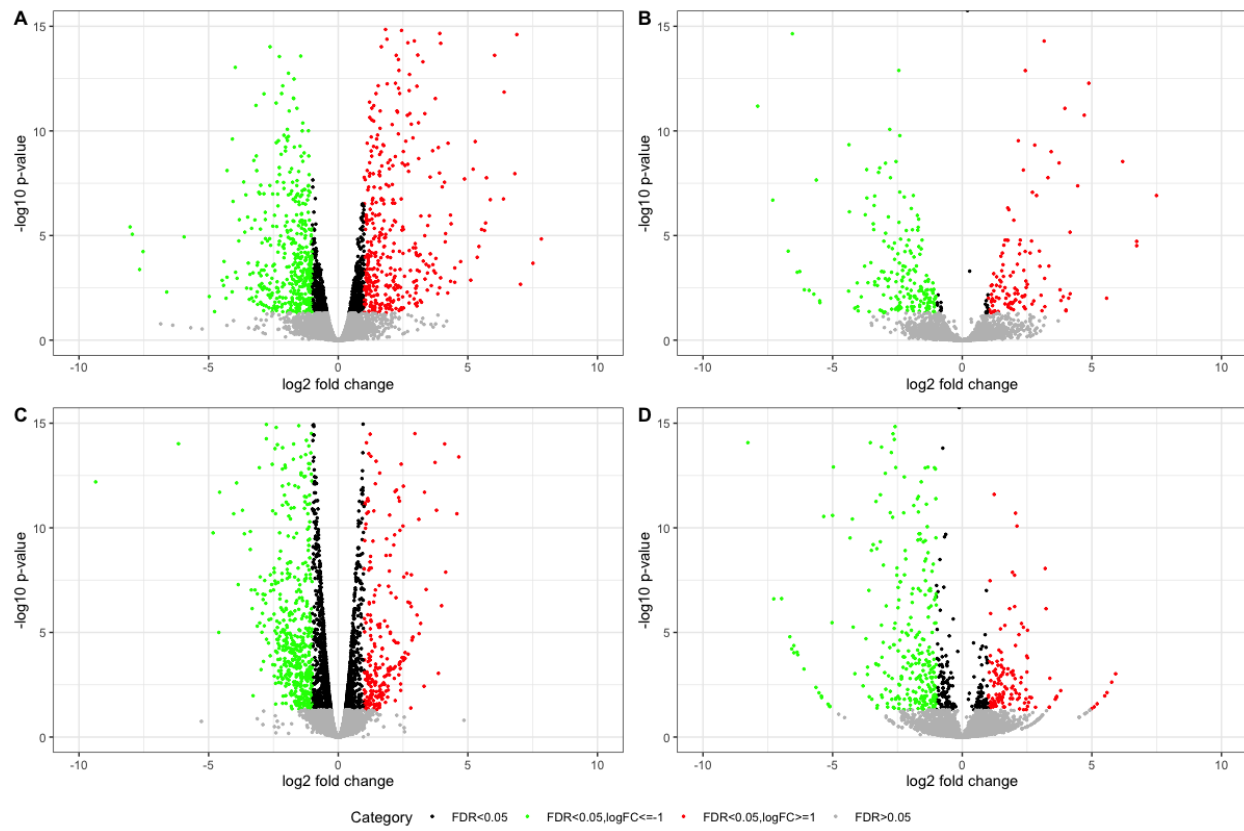

**Supplementary Figure S3.** Volcano plots of mRNAs and lncRNAs. The values on the X axes are the log2 fold change. The values on the Y axes are the  $-\log_{10}(\text{false discovery rate (FDR)})$ . The red point represents differentially up-regulated ones with filtering criteria fold change  $\geq 2$  and p-value  $< 0.05$ . The green point represents differentially down-regulated ones with filtering criteria fold change  $\leq -2$  and p-value  $< 0.05$ . (A) messenger RNAs (mRNAs) in IMAC. (B). lncRNAs in IMAC. (C) mRNAs in ABI. (D). lncRNAs in ABI.

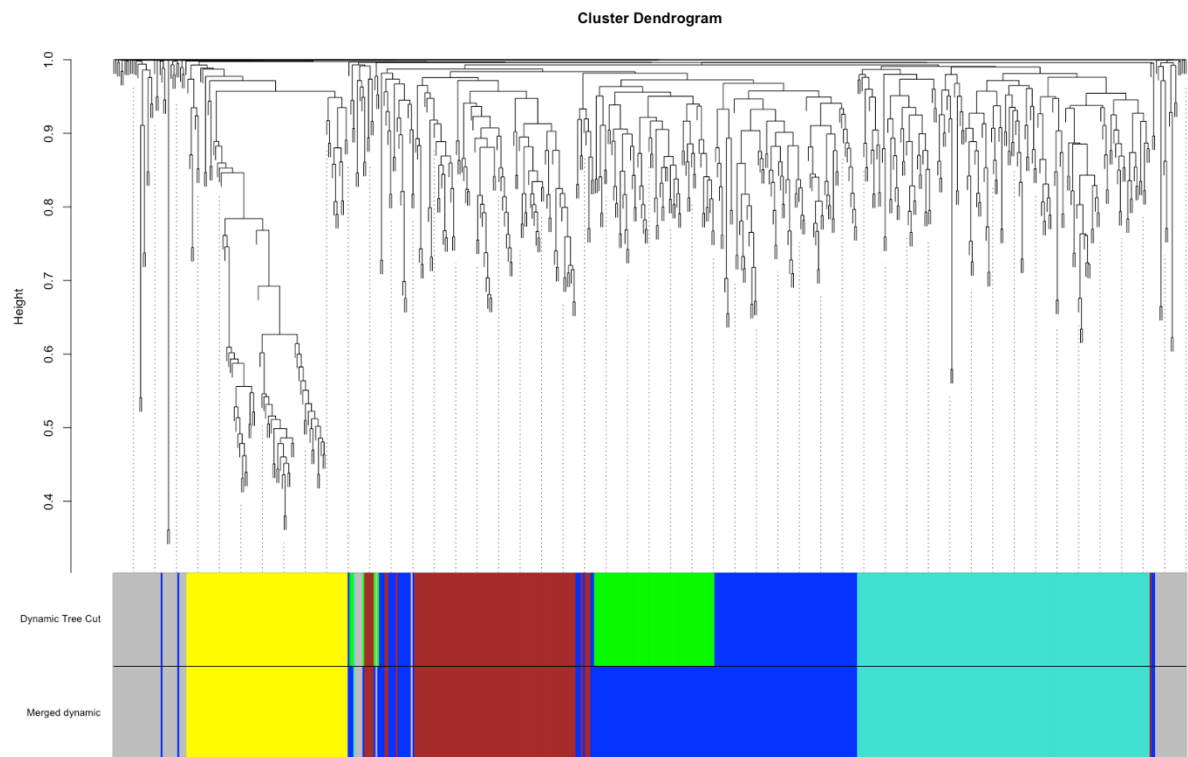

**Supplementary Figure S4.** Visualization of WGCNA module detection. Gene clustering tree (dendrogram) obtained by hierarchical clustering of TOM-based dissimilarity of 434 mRNAs and 146 lncRNAs. The color rows below the dendrogram indicate module membership identified by the two methods: dynamic tree cut and merged dynamic branch cutting (used in the further analysis).

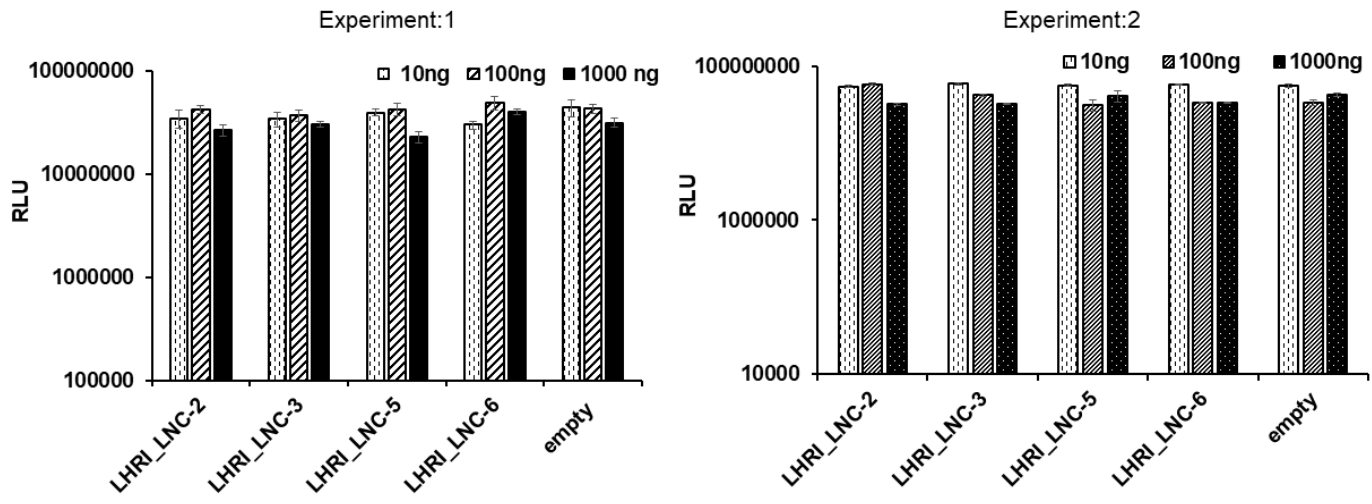

**Supplementary Figure S5.** HEK293T were treated with 10, 100, 1000ng of plasmid (LHRI\_LNC-2,3,5,6) and then infected with HIV<sub>luc</sub> and cultured for 48hrs. Luciferase activity is shown in relative units (RLU). This was repeated twice (Experiment1 and 2) to verify the results. No antiviral effect was observed.
