# Supplementary material for: Profiles of Long Non-Coding RNAs and mRNA Expression in Human Macrophages Regulated by Interleukin-27
Source: MDPI journal article supplement (doi:10.3390/ijms20246207), 2019-12-09
Supplement: s1 [file s1 › Table S1.xlsx]

## Sheet: Sheet2
Supplementary Table S1. HISAT2 alignment statistics
Sample ID	Treatment	Total reads	Mapped reads	Mapped (%)
Abi-Don91(SLABI91)	IL27	154388835	144793318	0.9378
Ab-Don91(SLABI90)	Control	174447074	164375557	0.9423
Abi-Don90(SLAB91)	IL27	82914605	77553773	0.9353
Ab-Don90(SLAB90)	Control	123792592	116613447	0.942
iMac-Don1	IL27	103957293	102452599	0.9855
mMac-Don1	Control	124299927	122709120	0.9872
iMac-Don2	IL27	118285953	116575121	0.9855
mMac-Don2	Control	113965032	112441090	0.9866
iMac-Don3	IL27	113957180	112113204	0.9838
mMac-Don3	Control	117546580	115817644	0.9853
