# Supplementary material for: Profiles of Long Non-Coding RNAs and mRNA Expression in Human Macrophages Regulated by Interleukin-27
Source: MDPI journal article supplement (doi:10.3390/ijms20246207), 2019-12-09
Supplement: s1 [file s1 › Table S2.xlsx]

## Sheet: Sheet1
Genbank id	LHRI transcript_id name	LHRI gene name	chr	start	end	strand	locus	nearby.gene	H3K4me3_microphage	H3K36me3_microphage	H3K27ac_microphage	Regulatory_type	num_exons	len	ref_gene_id.lncipedia	ref_id.lncipedia	class_code.lncipedia	ref_gene_id.NONCODE	ref_id.NONCODE	class_code.NONCODE	ref_gene_id.gencode	ref_id.gencode	class_code.gencode	Gencode.lncRNA	Really new
MK280176	LHRI_LNC1.1	LHRI_LNC1	15	99419766	99420013	-	15:99419766-99420013:-	NA	NA	NA	NA	CTCF Binding Site,TF binding site,	1	248	lnc-TTC23-3	lnc-TTC23-3:3	p	NONHSAG018073.2	NONHSAT171315.1	i	-	-	u
MK280619	LHRI_LNC10.1	LHRI_LNC10	9	41232888	41235017	-	9:41232888-41235017:-	MIR4477A	NA	M2,M0,M1,	NA	CTCF Binding Site,Promoter Flanking Region,Promoter,	1	2130	-	-	u	-	-	u	-	-	u		Yes
MK280526	LHRI_LNC11.1	LHRI_LNC11	7	10453265	10453503	+	7:10453265-10453503:+	AC004949.1	NA	M2,M1,	NA	Promoter Flanking Region,	1	239	lnc-NDUFA4-2	lnc-NDUFA4-2:2	i	NONHSAG046937.2	NONHSAT213160.1	i	AC004949.1	ENST00000634803.1	i	yes
MN298342	LHRI_LNC12.1	LHRI_LNC12	6	136784014	136802234	+	6:136784014-136802234:+	MAP3K5	NA	M2,M0,M1,	M0,	NA	3	984	lnc-PEX7-4	lnc-PEX7-4:1	j	NONHSAG093642.1	NONHSAT208086.1	o	-	-	u
MK280599	LHRI_LNC13.1	LHRI_LNC13	8	114029502	114029850	-	8:114029502-114029850:-	NA	NA	NA	NA	NA	1	349	-	-	u	-	-	u	-	-	u		Yes
MK280263	LHRI_LNC14.1	LHRI_LNC14	19	14622241	14623298	+	19:14622241-14623298:+	AC022149.1	NA	M2,M1,M0,	NA	CTCF Binding Site,	1	1058	-	-	u	-	-	u	-	-	u		Yes
MK280119	LHRI_LNC15.1	LHRI_LNC15	12	104031619	104032466	+	12:104031619-104032466:+	GLT8D2	NA	M2,M1,M0,	NA	Promoter,	1	848	lnc-C12orf73-1	lnc-C12orf73-1:1	x	NONHSAG012134.2	NONHSAT030405.2	x	-	-	u
MK280186	LHRI_LNC16.1	LHRI_LNC16	16	26031709	26032436	-	16:26031709-26032436:-	HS3ST4	NA	M0,M1,M2,	NA	NA	1	728	lnc-ZKSCAN2-8	lnc-ZKSCAN2-8:1	p	NONHSAG018944.2	NONHSAT141405.2	p	AC093516.1	ENST00000648941.1	i	yes
MK280585	LHRI_LNC17.1	LHRI_LNC17	8	61203223	61203512	+	8:61203223-61203512:+	CLVS1	NA	M2,M1,	NA	NA	1	290	-	-	u	-	-	u	-	-	u		Yes
MK280140	LHRI_LNC18.1	LHRI_LNC18	14	25266302	25266641	-	14:25266302-25266641:-	HMGN2P6	NA	NA	NA	NA	1	340	lnc-STXBP6-3	lnc-STXBP6-3:1	p	NONHSAG014567.2	NONHSAT036082.2	p	-	-	u
MK280384	LHRI_LNC19.1	LHRI_LNC19	22	35838260	35838697	-	22:35838260-35838697:-	RBFOX2	NA	M2,M0,M1,	NA	Promoter,	1	438	lnc-MB-5	lnc-MB-5:1	c	NONHSAG033811.2	NONHSAT085075.2	c	-	-	u
MK280257	LHRI_LNC2.1	LHRI_LNC2	18	45800523	45826194	-	18:45800523-45826194:-	SIGLEC15	NA	NA	M1,M2,M0,	Promoter Flanking Region,	2	837	-	-	u	NONHSAG075160.1	NONHSAT178442.1	j	-	-	u
MK280200	LHRI_LNC20.1	LHRI_LNC20	16	35802421	35802712	-	16:35802421-35802712:-	HMGN2P41	NA	M2,	NA	NA	1	292	lnc-TP53TG3-73	lnc-TP53TG3-73:1	c	NONHSAG019323.2	NONHSAT142244.2	c	-	-	u
MK280135	LHRI_LNC21.1	LHRI_LNC21	13	109424123	109424380	-	13:109424123-109424380:-	NA	NA	M1,M0,	NA	Enhancer,Open chromatin,CTCF Binding Site,	1	258	lnc-MYO16-7	lnc-MYO16-7:1	x	NONHSAG014156.2	NONHSAT035109.2	x	-	-	u
MK279938	LHRI_LNC24.1	LHRI_LNC24	1	633847	634228	-	1:633847-634228:-	MTATP6P1	NA	M1,M0,	NA	CTCF Binding Site,TF binding site,	1	382	lnc-OR4F16-8	lnc-OR4F16-8:1	o	NONHSAG000032.2	NONHSAT000089.2	o	-	-	u
MK280569	LHRI_LNC3.1	LHRI_LNC3	7	157105639	157111072	+	7:157105639-157111072:+	AC006967.3	NA	NA	NA	CTCF Binding Site,	2	1204	lnc-UBE3C-10	lnc-UBE3C-10:1	o	NONHSAG096848.1	NONHSAT212996.1	o	AC006967.3	ENST00000594086.2	o	yes
MN298468	LHRI_LNC3.2	LHRI_LNC3	7	157105639	157118685	+	7:157105639-157118685:+	AC006967.3	NA	NA	NA	CTCF Binding Site,	4	2617	lnc-UBE3C-10	lnc-UBE3C-10:1	k	NONHSAG096848.1	NONHSAT212996.1	k	AC006967.3	ENST00000594086.2	k	yes
MK280570	LHRI_LNC3.3	LHRI_LNC3	7	157105684	157123563	+	7:157105684-157123563:+	AC006967.3	NA	NA	NA	CTCF Binding Site,	5	2798	lnc-UBE3C-10	lnc-UBE3C-10:1	k	NONHSAG096848.1	NONHSAT212996.1	k	AC006967.3	ENST00000594086.2	k	yes
MN297218	LHRI_LNC31.1	LHRI_LNC31	13	109424125	109424363	+	13:109424125-109424363:+	NA	NA	M0,M1,	NA	CTCF Binding Site,Open chromatin,Enhancer,	1	239	lnc-MYO16-7	lnc-MYO16-7:1	c	NONHSAG014156.2	NONHSAT035109.2	c	-	-	u
MN297237	LHRI_LNC32.2	LHRI_LNC32	14	49545445	49586878	+	14:49545445-49586878:+	AL139099.4	NA	M2,	NA	Open chromatin,	2	284	lnc-LRR1-1	lnc-LRR1-1:4	o	NONHSAG014875.2	NONHSAT036719.2	o	AL139099.4	ENST00000635274.1	o	yes?
MN297238	LHRI_LNC32.3	LHRI_LNC32	14	49577001	49586878	+	14:49577001-49586878:+	AL139099.4	NA	M1,M0,M2,	NA	NA	2	259	lnc-LRR1-1	lnc-LRR1-1:4	o	NONHSAG014875.2	NONHSAT036719.2	o	AL139099.4	ENST00000635274.1	o	yes?
MN297236	LHRI_LNC32.1	LHRI_LNC32	14	49510993	49586878	+	14:49510993-49586878:+	AL139099.4	NA	M2,	NA	Enhancer,	2	281	lnc-LRR1-1	lnc-LRR1-1:4	o	NONHSAG014875.2	NONHSAT036719.2	o	AL139099.4	ENST00000635274.1	o	yes?
MN297105	LHRI_LNC33.2	LHRI_LNC33	11	117833893	117842144	+	11:117833893-117842144:+	AP000757.1	NA	NA	NA	Open chromatin,Promoter Flanking Region,	4	2273	lnc-IL10RA-1	lnc-IL10RA-1:1	j	NONHSAG009739.2	NONHSAT024421.2	j	AP000757.1	ENST00000534150.5	j	yes
MK280092	LHRI_LNC34.16	LHRI_LNC34	12	8391026	8398750	-	12:8391026-8398750:-	AC092865.3,LINC00937,OR7E149P	NA	M1,	NA	CTCF Binding Site,Promoter,Open chromatin,	2	1573	LINC00937	LINC00937:18	y	NONHSAG010402.1	NONHSAT026319.1	o	LINC00937	ENST00000538304.1	y	yes
MK280093	LHRI_LNC34.20	LHRI_LNC34	12	8428991	8453204	-	12:8428991-8453204:-	AC092865.3,LINC00937,OR7E149P	NA	NA	NA	Promoter Flanking Region,	3	2144	lnc-CLEC4E-5	lnc-CLEC4E-5:3	j	NONHSAG065299.1	NONHSAT163271.1	j	-	-	u
MN298422	LHRI_LNC35.1	LHRI_LNC35	7	97927122	97927344	-	7:97927122-97927344:-	AC079781.5	M1,	M1,	NA	CTCF Binding Site,Promoter Flanking Region,	1	223	lnc-ASNS-1	lnc-ASNS-1:10	e	NONHSAG048277.2	NONHSAT122156.2	e	AC079781.5	ENST00000641784.1	i	yes
MN297026	LHRI_LNC36.1	LHRI_LNC36	11	3583436	3583764	-	11:3583436-3583764:-	NA	NA	NA	NA	CTCF Binding Site,Open chromatin,	1	329	-	-	u	NONHSAG007463.1	NONHSAT017596.1	i	-	-	u
MN297318	LHRI_LNC37.1	LHRI_LNC37	15	83093998	83110660	-	15:83093998-83110660:-	AC022558.2	M1,M0,	M2,M0,M1,	M0,M1,M2,	Promoter,Promoter Flanking Region,	4	3941	lnc-FAM103A1-1	lnc-FAM103A1-1:1	x	NONHSAG017679.2	NONHSAT047875.2	x	AC022558.2	ENST00000566841.1	x	yes
MK280170	LHRI_LNC37.2	LHRI_LNC37	15	83094011	83110660	-	15:83094011-83110660:-	AC022558.2	M0,M1,	M2,M0,M1,	M0,M1,M2,	Promoter,Promoter Flanking Region,	3	3845	lnc-FAM103A1-1	lnc-FAM103A1-1:1	x	NONHSAG017679.2	NONHSAT047875.2	x	AC022558.2	ENST00000566841.1	x	yes
MN297327	LHRI_LNC38.6	LHRI_LNC38	15	99347321	99401315	-	15:99347321-99401315:-	AC015660.2	M1,	M2,M1,M0,	M1,	Promoter Flanking Region,	5	716	lnc-TTC23-2	lnc-TTC23-2:4	j	NONHSAG018072.2	NONHSAT050869.2	j	LINC02244	ENST00000561362.1	j	yes
MN297329	LHRI_LNC38.14	LHRI_LNC38	15	99387167	99401315	-	15:99387167-99401315:-	AC015660.2	M1,	M1,M0,M2,	M1,	Promoter Flanking Region,	4	724	lnc-TTC23-2	lnc-TTC23-2:4	j	NONHSAG018072.2	NONHSAT050869.2	j	LINC02244	ENST00000561362.1	j	yes
MK280172	LHRI_LNC38.4	LHRI_LNC38	15	99347293	99396593	-	15:99347293-99396593:-	AC015660.2	NA	M1,M0,M2,	NA	NA	3	496	lnc-TTC23-2	lnc-TTC23-2:4	j	NONHSAG018072.2	NONHSAT050869.2	j	LINC02244	ENST00000561362.1	j	yes
MN297326	LHRI_LNC38.5	LHRI_LNC38	15	99347321	99401315	-	15:99347321-99401315:-	AC015660.2	M1,	M2,M0,M1,	M1,	Promoter Flanking Region,	5	582	lnc-TTC23-2	lnc-TTC23-2:4	j	NONHSAG018072.2	NONHSAT050869.2	j	LINC02244	ENST00000561362.1	j	yes
MK280173	LHRI_LNC38.8	LHRI_LNC38	15	99357934	99396593	-	15:99357934-99396593:-	AC015660.2	NA	M0,M1,M2,	NA	NA	3	15284	lnc-TTC23-2	lnc-TTC23-2:4	j	NONHSAG018072.2	NONHSAT050869.2	j	LINC02244	ENST00000561362.1	j	yes
MK280174	LHRI_LNC38.10	LHRI_LNC38	15	99357934	99396593	-	15:99357934-99396593:-	AC015660.2	NA	M2,M1,M0,	NA	NA	3	15281	lnc-TTC23-2	lnc-TTC23-2:4	j	NONHSAG018072.2	NONHSAT050869.2	j	LINC02244	ENST00000561362.1	j	yes
MN297324	LHRI_LNC38.2	LHRI_LNC38	15	99292578	99396593	-	15:99292578-99396593:-	AC015660.2	NA	M2,M1,M0,	NA	NA	3	366	lnc-TTC23-2	lnc-TTC23-2:4	j	NONHSAG018072.2	NONHSAT050869.2	j	LINC02244	ENST00000561362.1	j	yes
MN297325	LHRI_LNC38.3	LHRI_LNC38	15	99302241	99396593	-	15:99302241-99396593:-	AC015660.2	NA	M1,M0,M2,	NA	NA	3	366	lnc-TTC23-2	lnc-TTC23-2:4	j	NONHSAG018072.2	NONHSAT050869.2	j	LINC02244	ENST00000561362.1	j	yes
MN298026	LHRI_LNC39.1	LHRI_LNC39	3	119516350	119517514	-	3:119516350-119517514:-	TIMMDC1	NA	M1,M0,M2,	NA	NA	1	1165	-	-	u	-	-	u	-	-	u		Yes
MK280027	LHRI_LNC4.1	LHRI_LNC4	10	96751826	96755077	+	10:96751826-96755077:+	RPL13AP5	NA	M2,M1,M0,	NA	NA	1	3252	-	-	u	-	-	u	-	-	u		Yes
MN298157	LHRI_LNC40.2	LHRI_LNC40	4	184843322	184853596	-	4:184843322-184853596:-	MIR3945HG	NA	NA	M1,	Promoter Flanking Region,	3	3411	MIR3945HG	MIR3945HG:6	j	NONHSAG039503.2	NONHSAT099567.2	j	MIR3945HG	ENST00000511703.5	j	Yes
MN298294	LHRI_LNC41.1	LHRI_LNC41	6	33017245	33018093	-	6:33017245-33018093:-	NA	NA	NA	M1,M0,	Promoter Flanking Region,	1	849	-	-	u	-	-	u	-	-	u		Yes
MK280501	LHRI_LNC42.1	LHRI_LNC42	6	110475430	110479436	+	6:110475430-110479436:+	AC002464.1	NA	NA	NA	Promoter,	2	361	lnc-CDC40-1	lnc-CDC40-1:1	o	NONHSAG044587.2	NONHSAT114423.2	o	AC002464.1	ENST00000569685.1	o	yes
MN298343	LHRI_LNC43.1	LHRI_LNC43	6	137940927	137957711	-	6:137940927-137957711:-	AL591468.1	NA	NA	NA	Enhancer,Promoter Flanking Region,TF binding site,	4	4549	lnc-PERP-1	lnc-PERP-1:4	j	NONHSAG044962.2	NONHSAT115194.2	j	AL591468.1	ENST00000417932.1	j	yes
MN298484	LHRI_LNC44.1	LHRI_LNC44	8	19848613	19876735	-	8:19848613-19876735:-	INTS10	NA	NA	NA	NA	2	1081	-	-	u	NONHSAG099327.1	NONHSAT216821.1	o	-	-	u
MN298599	LHRI_LNC45.1	LHRI_LNC45	9	64789716	64870654	-	9:64789716-64870654:-	AL359955.1,NA	NA	NA	NA	Enhancer,	2	870	lnc-ANKRD20A4-4	lnc-ANKRD20A4-4:1	x	NONHSAG101357.1	NONHSAT219564.1	x	-	-	u
MN298600	LHRI_LNC45.2	LHRI_LNC45	9	64843124	64870586	-	9:64843124-64870586:-	AL359955.1,NA	NA	NA	NA	Enhancer,	2	685	lnc-ANKRD20A4-4	lnc-ANKRD20A4-4:1	x	NONHSAG101357.1	NONHSAT219564.1	x	-	-	u
MN298625	LHRI_LNC46.1	LHRI_LNC46	9	89110657	89110979	-	9:89110657-89110979:-	SHC3	NA	NA	NA	NA	1	323	-	-	u	-	-	u	-	-	u		Yes
MK280118	LHRI_LNC5.1	LHRI_LNC5	12	101646720	101650537	-	12:101646720-101650537:-	AC117505.1	NA	NA	NA	NA	2	455	lnc-SYCP3-2	lnc-SYCP3-2:1	j	NONHSAG012077.2	NONHSAT030288.2	j	AC117505.1	ENST00000547027.1	j	yes
MN297183	LHRI_LNC5.2	LHRI_LNC5	12	101646720	101650537	-	12:101646720-101650537:-	AC117505.1	NA	NA	NA	NA	2	419	lnc-SYCP3-2	lnc-SYCP3-2:1	j	NONHSAG012077.2	NONHSAT030288.2	j	AC117505.1	ENST00000547027.1	j	yes
MN298516	LHRI_LNC6.1	LHRI_LNC6	8	85839705	85908613	+	8:85839705-85908613:+	AC100801.1	NA	NA	NA	Promoter Flanking Region,	3	442	lnc-ATP6V0D2-2	lnc-ATP6V0D2-2:7	=	NONHSAG050666.2	NONHSAT127540.2	j	AC100801.1	ENST00000517368.1	j	yes
MK280165	LHRI_LNC7.4	LHRI_LNC7	15	70295897	70364229	-	15:70295897-70364229:-	AC048383.1,NA	NA	M1,M0,M2,	NA	CTCF Binding Site,Promoter Flanking Region,	3	589	LINC02204	LINC02204:17	j	NONHSAG017299.2	NONHSAT171744.1	j	AC048383.1	ENST00000558226.1	x	yes
MK280164	LHRI_LNC7.3	LHRI_LNC7	15	70230977	70364226	-	15:70230977-70364226:-	AC048383.1,NA	NA	M2,M1,M0,	NA	Promoter Flanking Region,CTCF Binding Site,	3	3394	LINC02204	LINC02204:17	j	NONHSAG017296.1	NONHSAT046987.1	o	AC048383.1	ENST00000558226.1	x	yes
MN297310	LHRI_LNC7.1	LHRI_LNC7	15	70129563	70364190	-	15:70129563-70364190:-	AC048383.1,NA	NA	M2,M1,M0,	NA	CTCF Binding Site,Promoter Flanking Region,	3	1167	lnc-LRRC49-3	lnc-LRRC49-3:1	x	NONHSAG070837.1	NONHSAT171738.1	j	AC048383.1	ENST00000558226.1	x	yes
MN297312	LHRI_LNC7.5	LHRI_LNC7	15	70360804	70364226	-	15:70360804-70364226:-	AC048383.1,NA	NA	M1,M0,M2,	NA	CTCF Binding Site,Promoter Flanking Region,	2	719	LINC02204	LINC02204:17	i	-	-	u	-	-	u
MN297311	LHRI_LNC7.2	LHRI_LNC7	15	70230741	70364226	-	15:70230741-70364226:-	AC048383.1,NA	NA	M2,M0,M1,	NA	CTCF Binding Site,Promoter Flanking Region,	2	3568	lnc-LRRC49-3	lnc-LRRC49-3:1	x	NONHSAG017300.2	NONHSAT046997.2	x	AC048383.1	ENST00000558226.1	x	yes
MN298210	LHRI_LNC8.1	LHRI_LNC8	5	122628756	122697397	-	5:122628756-122697397:-	LINC02201	NA	NA	M1,	Promoter Flanking Region,	3	1001	LINC02201	LINC02201:15	=	NONHSAG041376.2	NONHSAT103479.2	j	LINC02201	ENST00000511194.5	j	yes
MK280468	LHRI_LNC8.2	LHRI_LNC8	5	122628843	122697397	-	5:122628843-122697397:-	LINC02201	NA	NA	M1,	Promoter Flanking Region,	4	995	LINC02201	LINC02201:10	j	NONHSAG041376.2	NONHSAT103479.2	j	LINC02201	ENST00000511194.5	j	yes
MN298333	LHRI_LNC9.9	LHRI_LNC9	6	134437716	134506976	+	6:134437716-134506976:+	LINC01010	NA	M2,	M1,M0,	Promoter Flanking Region,	4	4559	LINC01010	LINC01010:4	j	NONHSAG044893.2	NONHSAT115032.2	j	LINC01010	ENST00000431422.1	j	Yes
MN298332	LHRI_LNC9.12	LHRI_LNC9	6	134437716	134504019	+	6:134437716-134504019:+	LINC01010	NA	M2,	M1,M0,	Promoter Flanking Region,	4	1625	LINC01010	LINC01010:4	j	NONHSAG044893.2	NONHSAT115032.2	j	LINC01010	ENST00000431422.1	j	Yes
MK280508	LHRI_LNC9.3	LHRI_LNC9	6	134437716	134508490	+	6:134437716-134508490:+	LINC01010	NA	M2,	M0,M1,	Promoter Flanking Region,	4	6109	LINC01010	LINC01010:4	j	NONHSAG044893.2	NONHSAT115032.2	j	LINC01010	ENST00000431422.1	j	Yes
MK280506	LHRI_LNC9.2	LHRI_LNC9	6	134437716	134508133	+	6:134437716-134508133:+	LINC01010	NA	M2,	M0,M1,	Promoter Flanking Region,	3	5560	LINC01010	LINC01010:4	j	NONHSAG044893.2	NONHSAT115032.2	j	LINC01010	ENST00000431422.1	j	Yes
MN298339	LHRI_LNC9.1	LHRI_LNC9	6	134437716	134507038	+	6:134437716-134507038:+	LINC01010	NA	M2,	M0,M1,	Promoter Flanking Region,	4	4596	LINC01010	LINC01010:4	j	NONHSAG044893.2	NONHSAT115032.2	j	LINC01010	ENST00000431422.1	j	Yes
MN298337	LHRI_LNC9.5	LHRI_LNC9	6	134437716	134507001	+	6:134437716-134507001:+	LINC01010	NA	M2,	M0,M1,	Promoter Flanking Region,	5	4715	LINC01010	LINC01010:4	j	NONHSAG044893.2	NONHSAT115032.2	j	LINC01010	ENST00000431422.1	j	Yes
MK280504	LHRI_LNC9.14	LHRI_LNC9	6	134437716	134504019	+	6:134437716-134504019:+	LINC01010	NA	M2,	M0,M1,	Promoter Flanking Region,	6	1794	LINC01010	LINC01010:4	j	NONHSAG044893.2	NONHSAT115032.2	j	LINC01010	ENST00000431422.1	j	Yes
MK280505	LHRI_LNC9.8	LHRI_LNC9	6	134437716	134504019	+	6:134437716-134504019:+	LINC01010	NA	M2,	M1,M0,	Promoter Flanking Region,	4	1750	LINC01010	LINC01010:4	j	NONHSAG044893.2	NONHSAT115032.2	j	LINC01010	ENST00000431422.1	j	Yes
MK280507	LHRI_LNC9.4	LHRI_LNC9	6	134437716	134508388	+	6:134437716-134508388:+	LINC01010	NA	M2,	M1,M0,	Promoter Flanking Region,	5	6064	LINC01010	LINC01010:4	j	NONHSAG044893.2	NONHSAT115032.2	j	LINC01010	ENST00000431422.1	j	Yes
MN298338	LHRI_LNC9.7	LHRI_LNC9	6	134437716	134507008	+	6:134437716-134507008:+	LINC01010	NA	M2,	M1,M0,	Promoter Flanking Region,	5	4745	LINC01010	LINC01010:4	j	NONHSAG044893.2	NONHSAT115032.2	j	LINC01010	ENST00000431422.1	j	Yes
MN298334	LHRI_LNC9.6	LHRI_LNC9	6	134437716	134506989	+	6:134437716-134506989:+	LINC01010	NA	M2,	M0,M1,	Promoter Flanking Region,	4	4534	LINC01010	LINC01010:4	j	NONHSAG044893.2	NONHSAT115032.2	j	LINC01010	ENST00000431422.1	j	Yes
MN298336	LHRI_LNC9.11	LHRI_LNC9	6	134437716	134507001	+	6:134437716-134507001:+	LINC01010	NA	M2,	M0,M1,	Promoter Flanking Region,	5	4622	LINC01010	LINC01010:4	j	NONHSAG044893.2	NONHSAT115032.2	j	LINC01010	ENST00000431422.1	j	Yes
MN298335	LHRI_LNC9.10	LHRI_LNC9	6	134437716	134507001	+	6:134437716-134507001:+	LINC01010	NA	M2,	M1,M0,	Promoter Flanking Region,	5	4702	LINC01010	LINC01010:4	j	NONHSAG044893.2	NONHSAT115032.2	j	LINC01010	ENST00000431422.1	j	Yes
MN298564	LHRI_LNC1479.1	LHRI_LNC1479	9	9302596	9442380	+	9:9302596-9442380:+	RN7SL5P	NA	NA	NA	NA	3	310	lnc-KDM4C-18	lnc-KDM4C-18:1	o	NONHSAG051772.2	NONHSAT130197.2	o	-	-	u
MN297242	LHRI_LNC2063.10	LHRI_LNC2063	14	49853621	49876010	-	14:49853621-49876010:-	RN7SL2,RN7SL3	NA	NA	NA	NA	3	295	lnc-NEMF-2	lnc-NEMF-2:2	o	NONHSAG014889.2	NONHSAT036748.2	o	AL627171.1	ENST00000618845.1	x	yes
MN297245	LHRI_LNC2063.11	LHRI_LNC2063	14	49853621	49884557	-	14:49853621-49884557:-	RN7SL2,RN7SL3	NA	NA	NA	Enhancer,	3	275	lnc-NEMF-1	lnc-NEMF-1:5	o	NONHSAG014892.2	NONHSAT036752.2	o	AL627171.1	ENST00000618845.1	x	yes
MN297240	LHRI_LNC2063.1	LHRI_LNC2063	14	49853585	49874544	-	14:49853585-49874544:-	RN7SL2,RN7SL3	NA	NA	NA	NA	3	300	lnc-NEMF-1	lnc-NEMF-1:5	o	NONHSAG014892.2	NONHSAT036752.2	o	AL627171.1	ENST00000618845.1	x	yes
MN297244	LHRI_LNC2063.7	LHRI_LNC2063	14	49853621	49884555	-	14:49853621-49884555:-	RN7SL2,RN7SL3	NA	NA	NA	Enhancer,	3	273	lnc-NEMF-2	lnc-NEMF-2:2	o	NONHSAG014889.2	NONHSAT036748.2	o	AL627171.1	ENST00000618845.1	x	yes
MN298122	LHRI_LNC972.3	LHRI_LNC972	4	90822729	90839037	-	4:90822729-90839037:-	TMSB4XP8	NA	NA	NA	Promoter,	2	503	lnc-SNCA-3	lnc-SNCA-3:1	o	NONHSAG038428.2	NONHSAT097413.2	o	-	-	u
MN297241	LHRI_LNC2063.4	LHRI_LNC2063	14	49853620	50202176	-	14:49853620-50202176:-	RN7SL2,RN7SL3	NA	M1,M0,M2,	NA	NA	3	345	lnc-NEMF-1	lnc-NEMF-1:5	o	NONHSAG014892.2	NONHSAT036752.2	o	AL627171.1	ENST00000618845.1	x	yes
MN297222	LHRI_LNC2040.2	LHRI_LNC2040	14	20343075	20343407	-	14:20343075-20343407:-	AL355075.4	M1,	M2,M1,M0,	NA	Promoter,	2	257	lnc-CCNB1IP1-1	lnc-CCNB1IP1-1:1	o	NONHSAG014362.2	NONHSAT035568.2	o	AL355075.4	ENST00000554988.1	o	yes
MN297071	LHRI_LNC1843.25	LHRI_LNC1843	11	65504519	65506465	+	11:65504519-65506465:+	MALAT1,RF01871,RF01684	M0,M1,	M2,M1,M0,	NA	Promoter,	2	1635	MALAT1	MALAT1:10	c	NONHSAG008675.2	NONHSAT022129.2	c	MALAT1	ENST00000618227.1	j	yes
MN297155	LHRI_LNC1953.1	LHRI_LNC1953	12	50456535	50456848	+	12:50456535-50456848:+	LARP4	NA	M1,M0,M2,	NA	Open chromatin,	1	314	-	-	u	-	-	u	-	-	u		Yes
MN297070	LHRI_LNC1843.24	LHRI_LNC1843	11	65504519	65506465	+	11:65504519-65506465:+	MALAT1,RF01871,RF01684	M1,M0,	M2,M0,M1,	NA	Promoter,	2	1722	MALAT1	MALAT1:3	c	NONHSAG008675.2	NONHSAT022126.2	c	MALAT1	ENST00000618227.1	j	yes
MK280643	LHRI_LNC1607.1	LHRI_LNC1607	MT	1	396	-	MT:1-396:-	NA	NA	NA	NA	CTCF Binding Site,	1	396	-	-	u	NONHSAG053890.1	NONHSAT135776.1	k	-	-	u
MN298184	LHRI_LNC1045.1	LHRI_LNC1045	5	55928657	55944897	+	5:55928657-55944897:+	AC016596.2	NA	NA	NA	NA	2	264	lnc-IL31RA-2	lnc-IL31RA-2:1	o	NONHSAG040411.2	NONHSAT101518.2	o	AC008914.1	ENST00000576302.1	y	yes
MN298677	LHRI_LNC1612.1	LHRI_LNC1612	MT	16342	16569	-	MT:16342-16569:-	NA	NA	NA	NA	CTCF Binding Site,	1	228	-	-	u	NONHSAG053897.2	NONHSAT135851.2	x	-	-	u
MK280332	LHRI_LNC601.1	LHRI_LNC601	2	230571871	230572102	-	2:230571871-230572102:-	AC010149.1	NA	M0,M2,	NA	CTCF Binding Site,	1	232	lnc-SP110-1	lnc-SP110-1:1	i	NONHSAG030742.2	NONHSAT077294.2	i	AC010149.1	ENST00000455357.5	i	yes
MN298135	LHRI_LNC989.1	LHRI_LNC989	4	139697804	139698106	-	4:139697804-139698106:-	MGST2	NA	M2,M1,M0,	NA	CTCF Binding Site,Open chromatin,	1	303	lnc-MAML3-2	lnc-MAML3-2:1	c	NONHSAG038956.2	NONHSAT199145.1	i	-	-	u
MN297065	LHRI_LNC1843.6	LHRI_LNC1843	11	65499042	65504463	+	11:65499042-65504463:+	MALAT1,RF01871,RF01684	M1,M0,	M2,M0,M1,	M1,M2,M0,	Promoter,	4	4452	MALAT1	MALAT1:14	c	NONHSAG008675.2	NONHSAT022134.2	c	MALAT1	ENST00000612781.1	j	yes
MN297067	LHRI_LNC1843.10	LHRI_LNC1843	11	65499052	65503609	+	11:65499052-65503609:+	MALAT1,RF01871,RF01684	M0,M1,	M2,M0,M1,	M0,M1,M2,	Promoter,	2	3924	MALAT1	MALAT1:49	j	NONHSAG008675.2	NONHSAT022139.2	j	MALAT1	ENST00000534336.1	o	yes
MN297203	LHRI_LNC2009.1	LHRI_LNC2009	13	22402139	22402390	+	13:22402139-22402390:+	NA	NA	NA	NA	NA	1	252	lnc-FGF9-16	lnc-FGF9-16:1	p	NONHSAG066855.1	NONHSAT165339.1	p	-	-	u
MK280463	LHRI_LNC1054.1	LHRI_LNC1054	5	76241199	76241516	-	5:76241199-76241516:-	SV2C	NA	NA	NA	NA	1	318	lnc-F2RL2-5	lnc-F2RL2-5:2	c	NONHSAG091053.1	NONHSAT204336.1	i	-	-	u
MN297426	LHRI_LNC187.3	LHRI_LNC187	17	19063480	19190245	-	17:19063480-19190245:-	SNORD3B-2	NA	NA	M0,	Promoter,	2	657	lnc-GRAP-1	lnc-GRAP-1:1	o	NONHSAG021085.2	NONHSAT146423.2	o	AC007952.3	ENST00000442355.6	x	yes
MN297425	LHRI_LNC187.4	LHRI_LNC187	17	19063480	19190235	-	17:19063480-19190235:-	SNORD3B-2	NA	NA	M0,	Promoter,	3	651	lnc-GRAP-1	lnc-GRAP-1:1	o	NONHSAG021085.2	NONHSAT146423.2	o	AC007952.4	ENST00000573866.2	o	yes
MK280657	LHRI_LNC1646.1	LHRI_LNC1646	X	68070287	68070513	-	X:68070287-68070513:-	OPHN1	NA	M0,M1,M2,	NA	NA	1	227	-	-	u	-	-	u	-	-	u		Yes
MK280560	LHRI_LNC1317.1	LHRI_LNC1317	7	104670028	104670626	+	7:104670028-104670626:+	LHFPL3	NA	M1,M0,M2,	NA	NA	2	324	-	-	u	NONHSAG048467.1	NONHSAT122602.1	i	-	-	u
MN297248	LHRI_LNC2063.8	LHRI_LNC2063	14	49853621	50202183	-	14:49853621-50202183:-	RN7SL2,RN7SL3	NA	M2,M0,M1,	NA	NA	3	524	lnc-NEMF-1	lnc-NEMF-1:5	o	NONHSAG014892.2	NONHSAT036752.2	o	AL627171.1	ENST00000618845.1	x	yes
MN296896	LHRI_LNC1043.2	LHRI_LNC1043	1	173863901	173867993	-	1:173863901-173867993:-	GAS5	M0,M1,	M1,M0,M2,	M0,M1,	Promoter,	12	599	GAS5	GAS5:45	j	NONHSAG003504.2	NONHSAT007668.2	j	GAS5	ENST00000430245.5	j	yes
MK280018	LHRI_LNC1750.1	LHRI_LNC1750	10	78943328	78978043	-	10:78943328-78978043:-	ZMIZ1-AS1	M1,	M1,M0,	M0,M1,	Promoter Flanking Region,	6	2051	ZMIZ1-AS1	ZMIZ1-AS1:30	j	NONHSAG006320.2	NONHSAT015089.2	j	ZMIZ1-AS1	ENST00000456353.5	j	yes
MN297250	LHRI_LNC2064.1	LHRI_LNC2064	14	49853631	49874535	+	14:49853631-49874535:+	AL627171.2	M0,M1,	M0,M1,M2,	M0,M1,	Promoter,	3	245	lnc-ARF6-1	lnc-ARF6-1:1	o	NONHSAG014890.2	NONHSAT036749.2	o	AL627171.2	ENST00000635177.1	x	yes
MK280663	LHRI_LNC1654.1	LHRI_LNC1654	X	77968041	77968358	-	X:77968041-77968358:-	ATP7A	NA	M2,M0,M1,	NA	NA	2	286	-	-	u	-	-	u	-	-	u		Yes
MK279995	LHRI_LNC1319.1	LHRI_LNC1319	1	211578859	211579208	-	1:211578859-211579208:-	NA	M0,M1,	M2,M0,	M0,M1,	Promoter,Enhancer,	1	350	lnc-TRAF5-11	lnc-TRAF5-11:1	i	NONHSAG004197.1	NONHSAT009292.1	i	-	-	u
MK280134	LHRI_LNC2034.1	LHRI_LNC2034	13	98812128	98812910	-	13:98812128-98812910:-	DOCK9	NA	M0,M1,M2,	NA	Open chromatin,	1	783	lnc-SLC15A1-2	lnc-SLC15A1-2:1	i	NONHSAG014021.1	NONHSAT034844.1	i	-	-	u
MK280464	LHRI_LNC1059.1	LHRI_LNC1059	5	80358805	80359078	-	5:80358805-80359078:-	HNRNPA1P12	NA	NA	NA	NA	1	274	-	-	u	-	-	u	-	-	u		Yes
MK280146	LHRI_LNC2081.1	LHRI_LNC2081	14	76761521	76761893	+	14:76761521-76761893:+	NA	M0,M1,	NA	NA	Promoter,	1	373	-	-	u	NONHSAG015517.1	NONHSAT037910.1	i	-	-	u
MK280267	LHRI_LNC365.1	LHRI_LNC365	19	39942640	39943744	-	19:39942640-39943744:-	PRR13P5	NA	M0,M1,M2,	NA	Promoter Flanking Region,	2	722	lnc-FCGBP-1	lnc-FCGBP-1:1	j	NONHSAG025807.2	NONHSAT066326.2	j	-	-	u
MN297787	LHRI_LNC623.1	LHRI_LNC623	20	5291705	5291928	-	20:5291705-5291928:-	UBE2D3P1	NA	M2,	NA	Promoter,	1	224	lnc-PROKR2-1	lnc-PROKR2-1:1	p	NONHSAG031196.2	NONHSAT078315.2	p	-	-	u
MK280243	LHRI_LNC250.1	LHRI_LNC250	17	62065393	62065992	-	17:62065393-62065992:-	NA	M1,M0,	M1,M0,	M1,M0,	Promoter,	1	600	lnc-EFCAB3-7	lnc-EFCAB3-7:1	x	NONHSAG073791.1	NONHSAT176428.1	o	-	-	u
MN297742	LHRI_LNC562.1	LHRI_LNC562	2	184790672	184790897	+	2:184790672-184790897:+	ZNF804A	NA	M2,	NA	NA	1	226	-	-	u	NONHSAG030030.1	NONHSAT075946.1	i	-	-	u
MN298731	LHRI_LNC1687.1	LHRI_LNC1687	Y	4767770	4768051	+	Y:4767770-4768051:+	NA	NA	NA	NA	NA	1	282	-	-	u	-	-	u	-	-	u		Yes
MK280166	LHRI_LNC2134.1	LHRI_LNC2134	15	71163604	71164544	-	15:71163604-71164544:-	THSD4	NA	M2,M1,M0,	NA	CTCF Binding Site,	1	941	lnc-CT62-3	lnc-CT62-3:1	c	NONHSAG017317.1	NONHSAT047022.1	x	THSD4-AS1	ENST00000561571.5	i	yes
MK279964	LHRI_LNC379.1	LHRI_LNC379	1	113509370	113509992	-	1:113509370-113509992:-	MAGI3	NA	M1,M2,	NA	TF binding site,	1	623	-	-	u	NONHSAG002458.1	NONHSAT005306.1	i	-	-	u
MK280169	LHRI_LNC52.1	LHRI_LNC52	15	78755148	78756488	+	15:78755148-78756488:+	AC022748.1	NA	M2,M0,M1,	NA	Promoter Flanking Region,	1	1341	lnc-MORF4L1-1	lnc-MORF4L1-1:1	p	NONHSAG017562.1	NONHSAT047565.1	e	-	-	u
MK280530	LHRI_LNC1265.1	LHRI_LNC1265	7	27456364	27458160	-	7:27456364-27458160:-	EIF4HP1	NA	M0,M1,M2,	NA	Open chromatin,	1	1797	lnc-HIBADH-5	lnc-HIBADH-5:1	e	NONHSAG096235.1	NONHSAT211853.1	x	-	-	u
MK279997	LHRI_LNC1429.2	LHRI_LNC1429	1	225821571	225845355	-	1:225821571-225845355:-	EPHX1	NA	M2,M1,M0,	NA	TF binding site,	2	3755	lnc-TMEM63A-1	lnc-TMEM63A-1:2	o	NONHSAG004457.2	NONHSAT153043.1	y	AL591895.1	ENST00000424332.1	y	yes
MK280155	LHRI_LNC2097.1	LHRI_LNC2097	15	29731305	29731816	+	15:29731305-29731816:+	TJP1	NA	M0,M1,M2,	NA	Open chromatin,	1	512	lnc-GOLGA8J-4	lnc-GOLGA8J-4:1	p	NONHSAG016382.1	NONHSAT041293.1	i	-	-	u
MN297754	LHRI_LNC581.1	LHRI_LNC581	2	201064055	201064613	+	2:201064055-201064613:+	FAM126B	NA	M0,M1,M2,	NA	NA	1	559	lnc-FAM126B-3	lnc-FAM126B-3:2	i	-	-	u	-	-	u
MK280160	LHRI_LNC2115.19	LHRI_LNC2115	15	41284006	41306534	+	15:41284006-41306534:+	OIP5-AS1	M0,M1,	M0,M1,M2,	M0,	Open chromatin,Promoter,	5	9954	OIP5-AS1	OIP5-AS1:25	k	NONHSAG016639.2	NONHSAT041921.2	j	OIP5-AS1	ENST00000501665.2	j	yes
MK280467	LHRI_LNC1076.1	LHRI_LNC1076	5	107194859	107195158	-	5:107194859-107195158:-	PSMC1P5	NA	M2,M1,	NA	NA	1	300	-	-	u	-	-	u	-	-	u		Yes
MK280240	LHRI_LNC236.1	LHRI_LNC236	17	49423341	49424092	-	17:49423341-49424092:-	AC091180.5	NA	M1,M0,M2,	NA	CTCF Binding Site,TF binding site,	1	752	lnc-NGFR-3	lnc-NGFR-3:6	i	NONHSAG022123.2	NONHSAT175333.1	i	AC091180.5	ENST00000576461.1	i	yes
MK280441	LHRI_LNC954.1	LHRI_LNC954	4	47707000	47707231	+	4:47707000-47707231:+	CORIN	NA	M2,	NA	CTCF Binding Site,	1	232	lnc-ATP10D-1	lnc-ATP10D-1:1	p	NONHSAG037886.2	NONHSAT096259.2	p	-	-	u
MN298371	LHRI_LNC1247.1	LHRI_LNC1247	7	192060	192914	+	7:192060-192914:+	AC093627.3	M1,M0,	M2,M0,M1,	M0,	Promoter,	1	855	lnc-PDGFA-8	lnc-PDGFA-8:1	i	NONHSAG046720.2	NONHSAT213043.1	i	AC093627.3	ENST00000467050.1	i	yes
MN298281	LHRI_LNC1149.1	LHRI_LNC1149	6	27688189	27688524	+	6:27688189-27688524:+	NA	M1,	NA	NA	Promoter Flanking Region,	1	336	-	-	u	-	-	u	-	-	u		Yes
MN298234	LHRI_LNC1116.1	LHRI_LNC1116	5	172656368	172656737	-	5:172656368-172656737:-	AC027309.2	NA	M2,M1,M0,	NA	Promoter Flanking Region,CTCF Binding Site,	2	314	lnc-DUSP1-6	lnc-DUSP1-6:1	o	NONHSAG042240.2	NONHSAT105127.2	o	-	-	u
MN298197	LHRI_LNC1061.1	LHRI_LNC1061	5	80651397	80651635	+	5:80651397-80651635:+	DHFR	NA	M1,M0,M2,	NA	Promoter,	1	239	lnc-ANKRD34B-5	lnc-ANKRD34B-5:1	i	NONHSAG040858.2	NONHSAT102415.2	x	-	-	u
MN298515	LHRI_LNC1421.1	LHRI_LNC1421	8	82291358	82291581	-	8:82291358-82291581:-	HNRNPA1P4	NA	M2,	NA	NA	1	224	lnc-SNX16-4	lnc-SNX16-4:1	i	NONHSAG050619.1	NONHSAT127450.1	x	-	-	u
MK279966	LHRI_LNC416.1	LHRI_LNC416	1	117776744	117777747	-	1:117776744-117777747:-	PNRC2P1	NA	M0,M1,M2,	NA	Promoter,	1	1004	lnc-GDAP2-3	lnc-GDAP2-3:2	c	NONHSAG002557.2	NONHSAT005496.2	o	-	-	u
MK280014	LHRI_LNC1734.1	LHRI_LNC1734	10	50266925	50267345	+	10:50266925-50267345:+	DYNC1I2P1	NA	M2,M0,M1,	NA	Open chromatin,	1	421	-	-	u	-	-	u	-	-	u		Yes
MN297069	LHRI_LNC1843.14	LHRI_LNC1843	11	65501960	65506465	+	11:65501960-65506465:+	MALAT1,RF01871,RF01684	M0,M1,	M2,M1,M0,	M0,	Promoter,	4	1394	MALAT1	MALAT1:47	j	NONHSAG008675.2	NONHSAT022126.2	j	MALAT1	ENST00000619449.2	j	yes
MK280601	LHRI_LNC1441.2	LHRI_LNC1441	8	123251140	123256204	+	8:123251140-123256204:+	RNU6-628P,ZHX1-C8orf76	NA	M2,M0,	M1,	Promoter Flanking Region,Enhancer,	2	476	lnc-C8orf76-1	lnc-C8orf76-1:4	x	NONHSAG051171.2	NONHSAT128531.2	i	-	-	u
MN298275	LHRI_LNC1145.1	LHRI_LNC1145	6	26156660	26157095	-	6:26156660-26157095:-	HIST1H1E	M1,M0,	M2,	NA	Promoter,	1	436	lnc-HIST1H4D-2	lnc-HIST1H4D-2:1	p	-	-	u	-	-	u
MK280671	LHRI_LNC1671.1	LHRI_LNC1671	X	111618415	111619314	-	X:111618415-111619314:-	AL589880.1	NA	M2,M0,M1,	NA	Promoter Flanking Region,	2	486	lnc-SERTM2-1	lnc-SERTM2-1:5	x	NONHSAG055109.2	NONHSAT138183.2	x	-	-	u
MK280322	LHRI_LNC559.1	LHRI_LNC559	2	180872693	180873414	-	2:180872693-180873414:-	FTH1P20	NA	NA	NA	Open chromatin,	2	685	lnc-CERKL-7	lnc-CERKL-7:1	o	NONHSAG029990.2	NONHSAT186024.1	o	SCHLAP1	ENST00000629145.1	i	yes
MK280578	LHRI_LNC1388.1	LHRI_LNC1388	8	35523591	35524651	-	8:35523591-35524651:-	UNC5D	NA	M1,M0,M2,	NA	Promoter,	1	1061	lnc-DUSP26-14	lnc-DUSP26-14:1	c	-	-	u	-	-	u
MN297190	LHRI_LNC1993.1	LHRI_LNC1993	12	110429258	110429558	-	12:110429258-110429558:-	AC144548.1	NA	M2,M1,	NA	Promoter Flanking Region,	1	301	lnc-ARPC3-2	lnc-ARPC3-2:4	i	NONHSAG012256.1	NONHSAT030640.1	e	AC144548.1	ENST00000550231.1	i	yes
MK280412	LHRI_LNC836.1	LHRI_LNC836	3	94505562	94506617	-	3:94505562-94506617:-	ARMC10P1	NA	M1,M0,M2,	NA	Promoter,	1	1056	lnc-DHFR2-4	lnc-DHFR2-4:1	o	-	-	u	-	-	u
MK280427	LHRI_LNC879.1	LHRI_LNC879	3	155988303	155988993	+	3:155988303-155988993:+	SETP14	NA	M0,M1,M2,	NA	NA	1	691	lnc-GMPS-2	lnc-GMPS-2:1	e	NONHSAG036469.2	NONHSAT092850.2	e	-	-	u
MN297130	LHRI_LNC1915.13	LHRI_LNC1915	12	9645316	9657043	+	12:9645316-9657043:+	AC092821.3	NA	NA	M1,	Promoter,CTCF Binding Site,	4	434	lnc-CLEC2D-8	lnc-CLEC2D-8:7	j	NONHSAG010453.2	NONHSAT026838.2	j	AC092821.3	ENST00000641304.1	j	yes
MK280025	LHRI_LNC1766.1	LHRI_LNC1766	10	91806261	91806975	-	10:91806261-91806975:-	TNKS2	NA	M0,M1,M2,	NA	Promoter Flanking Region,	1	715	lnc-FGFBP3-2	lnc-FGFBP3-2:3	c	NONHSAG006528.2	NONHSAT015642.2	e	-	-	u
MK280658	LHRI_LNC968.1	LHRI_LNC968	4	78180441	78180782	-	4:78180441-78180782:-	FRAS1	NA	M2,M0,M1,	NA	Promoter,	1	342	-	-	u	NONHSAG038271.1	NONHSAT097048.1	i	-	-	u
MK279993	LHRI_LNC1103.1	LHRI_LNC1103	1	182941819	182942101	-	1:182941819-182942101:-	SHCBP1L	NA	M2,M1,M0,	NA	Open chromatin,	1	283	lnc-RGS8-5	lnc-RGS8-5:1	p	NONHSAG003681.2	NONHSAT008343.2	p	-	-	u
MN297566	LHRI_LNC331.1	LHRI_LNC331	19	13837212	13842909	-	19:13837212-13842909:-	NA	M0,M1,	M2,M0,M1,	M1,M0,	Promoter,	1	5698	lnc-C19orf57-6	lnc-C19orf57-6:1	c	NONHSAG024928.1	NONHSAT061350.1	x	AC020916.1	ENST00000587762.2	c	yes
MK279996	LHRI_LNC1416.1	LHRI_LNC1416	1	224205168	224205435	-	1:224205168-224205435:-	NA	NA	M1,M2,	M0,	Promoter Flanking Region,	1	268	-	-	u	-	-	u	-	-	u		Yes
MN297744	LHRI_LNC567.1	LHRI_LNC567	2	190965008	190965505	-	2:190965008-190965505:-	GLS	NA	M2,M0,M1,	NA	NA	1	498	-	-	u	NONHSAG030090.1	NONHSAT076077.1	i	-	-	u
MN296805	LHRI_LNC2005.1	LHRI_LNC2005	1	36125394	36125798	-	1:36125394-36125798:-	NA	M1,	NA	NA	Promoter,	1	405	-	-	u	NONHSAG001028.1	NONHSAT002370.1	p	-	-	u
MK280561	LHRI_LNC1318.1	LHRI_LNC1318	7	104671026	104671583	+	7:104671026-104671583:+	LHFPL3	NA	M1,M0,M2,	NA	NA	1	558	-	-	u	NONHSAG048467.1	NONHSAT122602.1	i	-	-	u
MN298686	LHRI_LNC1625.1	LHRI_LNC1625	X	26206942	26207295	-	X:26206942-26207295:-	NA	NA	M2,M0,	NA	CTCF Binding Site,	1	354	-	-	u	-	-	u	-	-	u		Yes
MN297117	LHRI_LNC1900.1	LHRI_LNC1900	12	3211663	3211942	-	12:3211663-3211942:-	AC005912.1	NA	NA	NA	Promoter,	2	260	lnc-FOXM1-4	lnc-FOXM1-4:1	o	NONHSAG010211.2	NONHSAT025506.2	o	-	-	u
MK280076	LHRI_LNC1882.1	LHRI_LNC1882	11	110371784	110375719	-	11:110371784-110375719:-	AP000924.1	NA	NA	M0,M1,	Promoter Flanking Region,	3	873	lnc-FDX1-1	lnc-FDX1-1:1	i	NONHSAG009576.2	NONHSAT024072.2	i	AP000924.1	ENST00000526605.5	i	Yes?
MK280285	LHRI_LNC470.1	LHRI_LNC470	2	70271238	70272109	-	2:70271238-70272109:-	PCYOX1	NA	M2,M1,M0,	NA	TF binding site,	1	872	lnc-PCYOX1-3	lnc-PCYOX1-3:1	i	NONHSAG077447.1	NONHSAT181986.1	x	-	-	u
MN297719	LHRI_LNC535.1	LHRI_LNC535	2	131463291	131463517	+	2:131463291-131463517:+	AC073869.3	NA	M1,M2,	NA	Promoter Flanking Region,	1	227	lnc-MZT2A-2	lnc-MZT2A-2:1	x	NONHSAG079076.1	NONHSAT185549.1	x	AC073869.3	ENST00000609270.1	x	yes
MN297448	LHRI_LNC212.1	LHRI_LNC212	17	42533149	42533474	+	17:42533149-42533474:+	NA	NA	NA	M0,	Promoter Flanking Region,	1	326	lnc-NAGLU-1	lnc-NAGLU-1:2	c	NONHSAG021828.2	NONHSAT053721.2	p	-	-	u
MN298716	LHRI_LNC1677.2	LHRI_LNC1677	X	132218246	132283032	+	X:132218246-132283032:+	RAP2C-AS1	NA	NA	M0,	Promoter,	3	2622	RAP2C-AS1	RAP2C-AS1:12	j	NONHSAG103587.1	NONHSAT223030.1	k	RAP2C-AS1	ENST00000441399.2	j	Yes?
MK280521	LHRI_LNC1246.11	LHRI_LNC1246	7	137290	155465	+	7:137290-155465:+	AC093627.4	NA	M2,M1,M0,	NA	Promoter Flanking Region,Open chromatin,	4	3606	lnc-FAM20C-3	lnc-FAM20C-3:12	j	NONHSAG046715.2	NONHSAT118603.2	j	AC093627.4	ENST00000648846.1	j	yes
MN297350	LHRI_LNC85.2	LHRI_LNC85	16	14006738	14016001	-	16:14006738-14016001:-	LINC02185	NA	M1,M0,M2,	NA	Promoter Flanking Region,	4	3465	LINC02185	LINC02185:18	j	NONHSAG018661.2	NONHSAT140661.2	j	LINC02185	ENST00000575424.1	j	Yes?
MN298658	LHRI_LNC1568.5	LHRI_LNC1568	9	129282458	129287129	+	9:129282458-129287129:+	AL161785.2,AL161785.1	M1,M0,	M0,M1,M2,	NA	Promoter Flanking Region,	2	2264	lnc-PTPA-3	lnc-PTPA-3:6	j	NONHSAG053576.2	NONHSAT135036.2	j	AL161785.1	ENST00000455981.1	j	yes
MK280390	LHRI_LNC750.1	LHRI_LNC750	22	43644929	43645862	+	22:43644929-43645862:+	EFCAB6	NA	M2,M0,M1,	NA	NA	1	934	-	-	u	-	-	u	-	-	u		Yes
MK280627	LHRI_LNC1523.3	LHRI_LNC1523	9	72178509	72291846	-	9:72178509-72291846:-	GDA,AL135924.1,NA	NA	M0,M2,	M0,	CTCF Binding Site,Promoter Flanking Region,	3	2527	lnc-GDA-3	lnc-GDA-3:1	x	NONHSAG052553.2	NONHSAT131854.2	x	AL135924.2	ENST00000427901.1	x	yes
MN297639	LHRI_LNC432.7	LHRI_LNC432	2	32916229	32916622	-	2:32916229-32916622:-	LINC00486	NA	M2,M1,M0,	NA	TF binding site,	2	336	LINC00486	LINC00486:4	i	NONHSAG027432.2	NONHSAT069993.2	x	LINC00486	ENST00000414054.5	i	yes
MN298618	LHRI_LNC1523.16	LHRI_LNC1523	9	72280419	72291846	-	9:72280419-72291846:-	GDA,AL135924.1,NA	NA	M0,M2,	M0,	CTCF Binding Site,Promoter Flanking Region,	3	2277	-	-	u	NONHSAG052514.1	NONHSAT131782.1	x	-	-	u
MN297805	LHRI_LNC647.1	LHRI_LNC647	20	34200513	34200725	+	20:34200513-34200725:+	ASIP	NA	M2,M1,	NA	Open chromatin,	1	213	-	-	u	-	-	u	-	-	u		Yes
MK280114	LHRI_LNC1967.1	LHRI_LNC1967	12	66003355	66003769	-	12:66003355-66003769:-	NA	NA	NA	NA	Promoter Flanking Region,	1	415	lnc-LLPH-5	lnc-LLPH-5:1	i	NONHSAG011557.1	NONHSAT029197.1	x	-	-	u
MK280003	LHRI_LNC1705.1	LHRI_LNC1705	10	23138407	23138692	+	10:23138407-23138692:+	YWHAZP3	NA	M2,	NA	NA	1	286	-	-	u	-	-	u	-	-	u		Yes
MN297530	LHRI_LNC284.1	LHRI_LNC284	18	6256693	6302103	+	18:6256693-6302103:+	L3MBTL4-AS1	NA	M0,	M1,M0,	Promoter Flanking Region,CTCF Binding Site,	4	599	L3MBTL4-AS1	L3MBTL4-AS1:1	j	NONHSAG023274.2	NONHSAT057106.2	j	L3MBTL4-AS1	ENST00000578427.1	j	yes
MK280061	LHRI_LNC1843.19	LHRI_LNC1843	11	65503705	65506465	+	11:65503705-65506465:+	MALAT1,RF01871,RF01684	M1,M0,	M2,M1,M0,	NA	Promoter,	5	1843	MALAT1	MALAT1:47	j	NONHSAG008675.2	NONHSAT022126.2	j	MALAT1	ENST00000612781.1	k	yes
MN297988	LHRI_LNC809.1	LHRI_LNC809	3	46361029	46407102	-	3:46361029-46407102:-	AC098613.1	M1,M0,	M2,M0,M1,	M0,M2,M1,	Promoter,	3	4397	lnc-LTF-1	lnc-LTF-1:4	j	NONHSAG034950.2	NONHSAT089434.2	j	AC098613.1	ENST00000451485.1	j	yes
MN298676	LHRI_LNC1610.1	LHRI_LNC1610	MT	7588	13737	-	MT:7588-13737:-	MT-ND5	NA	NA	NA	CTCF Binding Site,	1	6150	-	-	u	NONHSAG103252.1	NONHSAT222398.1	e	-	-	u
MK279984	LHRI_LNC893.1	LHRI_LNC893	1	160318257	160318489	+	1:160318257-160318489:+	COPA	NA	M2,M1,M0,	NA	NA	1	233	-	-	u	NONHSAG058208.1	NONHSAT152440.1	x	-	-	u
MN296940	LHRI_LNC1534.1	LHRI_LNC1534	1	234609962	234610215	-	1:234609962-234610215:-	NA	M0,M1,	M0,M1,M2,	M1,M2,M0,	Promoter,	1	254	-	-	u	-	-	u	-	-	u		Yes
MK280287	LHRI_LNC482.1	LHRI_LNC482	2	85316626	85317194	+	2:85316626-85317194:+	AC093162.2	NA	M0,M1,M2,	NA	Open chromatin,	1	569	lnc-TCF7L1-1	lnc-TCF7L1-1:1	c	NONHSAG028372.2	NONHSAT071983.2	c	-	-	u
MN297483	LHRI_LNC227.1	LHRI_LNC227	17	46259072	46259273	+	17:46259072-46259273:+	NA	NA	M2,M0,M1,	NA	Promoter,	1	202	-	-	u	-	-	u	-	-	u		Yes
MN298641	LHRI_LNC1547.1	LHRI_LNC1547	9	103204333	103204847	-	9:103204333-103204847:-	LINC01492	NA	M1,M0,M2,	NA	NA	1	515	lnc-CYLC2-4	lnc-CYLC2-4:1	x	NONHSAG053082.2	NONHSAT133773.2	x	LINC01492	ENST00000411575.5	i	yes
MN298588	LHRI_LNC1508.8	LHRI_LNC1508	9	40992317	41039203	+	9:40992317-41039203:+	FRG1HP	M1,M0,	M2,M1,M0,	M2,M1,M0,	Promoter,	8	6276	lnc-ANKRD20A2-22	lnc-ANKRD20A2-22:2	j	NONHSAG052454.2	NONHSAT131633.2	j	AL353763.2	ENST00000623489.1	y	Yes?
MK280515	LHRI_LNC1238.1	LHRI_LNC1238	6	166585521	166586677	-	6:166585521-166586677:-	RAMMETL	NA	M1,M0,M2,	NA	Promoter,Promoter Flanking Region,Open chromatin,	2	978	lnc-MPC1-3	lnc-MPC1-3:1	o	NONHSAG045396.2	NONHSAT116053.2	o	-	-	u
MK280598	LHRI_LNC1435.1	LHRI_LNC1435	8	106696849	106697098	-	8:106696849-106697098:-	OXR1	NA	M2,M0,M1,	NA	Open chromatin,	1	250	-	-	u	NONHSAG051011.1	NONHSAT128231.1	i	-	-	u
MN298243	LHRI_LNC1128.1	LHRI_LNC1128	5	181207756	181208104	+	5:181207756-181208104:+	NA	NA	M1,	NA	Promoter,	1	349	lnc-TRIM7-3	lnc-TRIM7-3:1	i	NONHSAG042494.2	NONHSAT105888.2	i	-	-	u
MN297763	LHRI_LNC585.9	LHRI_LNC585	2	207662386	207679109	+	2:207662386-207679109:+	LINC01857	NA	M2,	NA	Promoter Flanking Region,	5	1010	LINC01857	LINC01857:11	j	NONHSAG030374.2	NONHSAT076616.2	j	LINC01857	ENST00000429730.1	j	yes
MK280345	LHRI_LNC642.1	LHRI_LNC642	20	32688932	32689777	-	20:32688932-32689777:-	FO393400.1	NA	M0,M1,M2,	NA	Promoter,Open chromatin,	1	846	-	-	u	NONHSAG031640.1	NONHSAT079427.1	i	-	-	u
MK280060	LHRI_LNC1843.4	LHRI_LNC1843	11	65499042	65506465	+	11:65499042-65506465:+	MALAT1,RF01871,RF01684	M1,M0,	M1,M0,M2,	M1,M2,M0,	Promoter,	4	6539	MALAT1	MALAT1:47	j	NONHSAG008675.2	NONHSAT022126.2	j	MALAT1	ENST00000612781.1	j	yes
MK280635	LHRI_LNC1560.1	LHRI_LNC1560	9	122957898	122958268	-	9:122957898-122958268:-	RABGAP1	NA	M2,M0,M1,	NA	NA	1	371	-	-	u	-	-	u	-	-	u		Yes
MK280513	LHRI_LNC1222.1	LHRI_LNC1222	6	142063208	142063449	+	6:142063208-142063449:+	NMBR	NA	M0,M2,	NA	NA	1	242	lnc-NMBR-3	lnc-NMBR-3:1	i	NONHSAG045013.2	NONHSAT115302.2	p	-	-	u
MK280618	LHRI_LNC1508.15	LHRI_LNC1508	9	40994243	41008993	+	9:40994243-41008993:+	FRG1HP	M0,M1,	M0,M1,M2,	M0,M1,M2,	Promoter Flanking Region,Promoter,	3	441	lnc-ANKRD20A2-22	lnc-ANKRD20A2-22:2	j	NONHSAG052454.2	NONHSAT131633.2	j	-	-	u
MN298610	LHRI_LNC1523.7	LHRI_LNC1523	9	72179679	72291846	-	9:72179679-72291846:-	GDA,AL135924.1,NA	NA	M2,M0,	M0,	CTCF Binding Site,Promoter Flanking Region,	5	1616	lnc-GDA-3	lnc-GDA-3:1	x	NONHSAG052553.2	NONHSAT131854.2	x	AL135924.2	ENST00000427901.1	x	yes
MK280131	LHRI_LNC2026.1	LHRI_LNC2026	13	50173218	50173506	+	13:50173218-50173506:+	DLEU1	NA	M2,	NA	Open chromatin,CTCF Binding Site,	1	289	DLEU1	DLEU1:14	i	NONHSAG013524.2	NONHSAT165704.1	i	DLEU1	ENST00000491615.5	i	yes
MN297224	LHRI_LNC2042.1	LHRI_LNC2042	14	20613183	20613520	-	14:20613183-20613520:-	NA	NA	NA	NA	Promoter Flanking Region,	1	338	-	-	u	-	-	u	-	-	u		Yes
MN298114	LHRI_LNC959.1	LHRI_LNC959	4	72127380	72127664	-	4:72127380-72127664:-	NPFFR2	NA	M2,	NA	NA	1	285	-	-	u	-	-	u	-	-	u		Yes
MN296959	LHRI_LNC1704.1	LHRI_LNC1704	10	23139087	23139390	+	10:23139087-23139390:+	YWHAZP3	NA	M2,	NA	NA	1	304	-	-	u	-	-	u	-	-	u		Yes
MK280218	LHRI_LNC179.31	LHRI_LNC179	17	16439345	16441502	+	17:16439345-16441502:+	LRRC75A-AS1,SNORD49A	M1,M0,	M2,M0,M1,	M1,M0,	Promoter,	4	988	LRRC75A-AS1	LRRC75A-AS1:26	j	NONHSAG020957.2	NONHSAT145937.2	j	LRRC75A-AS1	ENST00000581361.5	j	yes
MN296972	LHRI_LNC1722.1	LHRI_LNC1722	10	35336474	35336787	+	10:35336474-35336787:+	CCNY	M0,M1,	M1,	NA	Promoter,	1	314	-	-	u	-	-	u	-	-	u		Yes
MN298660	LHRI_LNC1569.5	LHRI_LNC1569	9	129488695	129513517	+	9:129488695-129513517:+	LINC00963	M1,M0,	M1,M0,M2,	M0,M1,	Promoter,	6	2126	LINC00963	LINC00963:54	j	NONHSAG053586.2	NONHSAT135075.2	j	LINC00963	ENST00000423918.5	j	yes
MN297881	LHRI_LNC687.1	LHRI_LNC687	21	26234864	26235719	-	21:26234864-26235719:-	NA	NA	M1,	NA	Open chromatin,	1	856	-	-	u	NONHSAG032540.1	NONHSAT081455.1	i	-	-	u
MN297698	LHRI_LNC514.1	LHRI_LNC514	2	109925068	109925533	+	2:109925068-109925533:+	AC013271.1	NA	M0,M1,M2,	NA	Enhancer,Promoter Flanking Region,	1	466	-	-	u	-	-	u	-	-	u		Yes
MN298341	LHRI_LNC1218.2	LHRI_LNC1218	6	136756562	136764012	+	6:136756562-136764012:+	MAP3K5	NA	M1,M0,M2,	NA	Open chromatin,Enhancer,Promoter Flanking Region,	3	500	-	-	u	NONHSAG044931.1	NONHSAT115129.1	i	-	-	u
MK280102	LHRI_LNC1933.1	LHRI_LNC1933	12	25804763	25804986	+	12:25804763-25804986:+	AC019209.3	NA	M1,M0,M2,	NA	Promoter,Open chromatin,	1	224	lnc-LMNTD1-2	lnc-LMNTD1-2:1	i	NONHSAG010713.2	NONHSAT027361.2	i	AC019209.3	ENST00000536949.1	i	yes
MK280576	LHRI_LNC1382.1	LHRI_LNC1382	8	23166531	23190100	-	8:23166531-23190100:-	TNFRSF10A-AS1	NA	M1,M0,M2,	NA	NA	2	2520	TNFRSF10A-AS1	TNFRSF10A-AS1:3	x	NONHSAG049762.1	NONHSAT125558.1	o	TNFRSF10A-AS1	ENST00000518308.1	x	yes
MK280183	LHRI_LNC75.1	LHRI_LNC75	16	2680037	2680864	+	16:2680037-2680864:+	NA	M1,	M1,M0,M2,	M0,	Promoter,Open chromatin,	1	828	lnc-PRSS27-4	lnc-PRSS27-4:1	i	NONHSAG018349.1	NONHSAT147803.1	o	-	-	u
MK280301	LHRI_LNC515.1	LHRI_LNC515	2	110445904	110446395	-	2:110445904-110446395:-	AC112229.3	NA	M2,M1,	NA	Promoter Flanking Region,Enhancer,	1	492	lnc-LIMS4-1	lnc-LIMS4-1:1	i	NONHSAG028920.2	NONHSAT073214.2	i	-	-	u
MK280416	LHRI_LNC845.1	LHRI_LNC845	3	112696271	112696857	-	3:112696271-112696857:-	AC048334.1	NA	M1,M0,M2,	NA	Open chromatin,	1	587	lnc-CCDC80-4	lnc-CCDC80-4:1	o	-	-	u	-	-	u
MK280182	LHRI_LNC74.1	LHRI_LNC74	16	2677677	2679690	+	16:2677677-2679690:+	NA	NA	M2,M0,M1,	NA	Open chromatin,	1	2014	lnc-PRSS27-4	lnc-PRSS27-4:1	i	NONHSAG018349.1	NONHSAT147803.1	e	-	-	u
MK280023	LHRI_LNC1761.1	LHRI_LNC1761	10	87760301	87803765	+	10:87760301-87803765:+	ATAD1	NA	M1,M0,M2,	NA	Enhancer,	5	2388	-	-	u	-	-	u	-	-	u		Yes
MK280543	LHRI_LNC1281.1	LHRI_LNC1281	7	55452746	55470547	-	7:55452746-55470547:-	VOPP1	NA	M2,M0,M1,	NA	NA	1	17802	lnc-SEPT14-6	lnc-SEPT14-6:1	k	NONHSAG047626.2	NONHSAT120680.2	e	-	-	u
MN298706	LHRI_LNC1658.1	LHRI_LNC1658	X	86901017	86901287	+	X:86901017-86901287:+	NA	NA	NA	NA	NA	1	271	-	-	u	-	-	u	-	-	u		Yes
MN297267	LHRI_LNC2085.1	LHRI_LNC2085	14	90061205	90061704	+	14:90061205-90061704:+	NA	M1,M0,	M2,	NA	Promoter,	1	500	lnc-KCNK13-1	lnc-KCNK13-1:2	e	NONHSAG015686.2	NONHSAT039206.2	e	-	-	u
MK280052	LHRI_LNC1836.9	LHRI_LNC1836	11	62852048	62855746	-	11:62852048-62855746:-	SNHG1,SNORD25,SNORD27	M0,M1,	M2,M1,M0,	NA	Promoter,	9	1498	SNHG1	SNHG1:3	j	NONHSAG008552.2	NONHSAT021826.2	j	SNHG1	ENST00000541578.5	j	Yes
MK280414	LHRI_LNC842.2	LHRI_LNC842	3	105998397	106196846	+	3:105998397-106196846:+	NA	NA	M2,	M1,	CTCF Binding Site,Promoter Flanking Region,	4	3346	lnc-ALCAM-8	lnc-ALCAM-8:7	j	NONHSAG035658.2	NONHSAT090974.2	j	-	-	u
MN296777	LHRI_LNC170.1	LHRI_LNC170	1	2617151	2617405	+	1:2617151-2617405:+	MMEL1	NA	M0,	NA	CTCF Binding Site,	1	255	-	-	u	-	-	u	-	-	u		Yes
MN297622	LHRI_LNC411.1	LHRI_LNC411	19	58535384	58584397	+	19:58535384-58584397:+	CENPBD1P1	NA	M2,M1,	NA	NA	2	305	lnc-CHMP2A-1	lnc-CHMP2A-1:2	x	NONHSAG026698.1	NONHSAT068303.1	x	MZF1-AS1	ENST00000600534.1	y	yes
MK280497	LHRI_LNC1190.1	LHRI_LNC1190	6	65304966	65306324	+	6:65304966-65306324:+	EYS	NA	M2,M0,M1,	NA	Open chromatin,	1	1359	lnc-PHF3-12	lnc-PHF3-12:2	e	NONHSAG044050.1	NONHSAT113363.1	i	-	-	u
MK280528	LHRI_LNC1264.20	LHRI_LNC1264	7	24761231	24784610	-	7:24761231-24784610:-	NA	NA	NA	M1,M0,	Enhancer,Open chromatin,CTCF Binding Site,	4	792	lnc-GSDME-1	lnc-GSDME-1:1	j	NONHSAG047136.2	NONHSAT213278.1	j	-	-	u
MK279992	LHRI_LNC1095.1	LHRI_LNC1095	1	180969051	180969278	+	1:180969051-180969278:+	AL162431.2	NA	M0,M1,M2,	NA	Open chromatin,	1	228	lnc-STX6-2	lnc-STX6-2:1	i	NONHSAG003633.2	NONHSAT008273.2	i	AL162431.2	ENST00000358073.2	i	yes
MK280202	LHRI_LNC122.1	LHRI_LNC122	16	55719785	55720437	-	16:55719785-55720437:-	NA	NA	M2,	NA	NA	1	653	-	-	u	-	-	u	-	-	u		Yes
MK279981	LHRI_LNC795.1	LHRI_LNC795	1	155626666	155637652	-	1:155626666-155637652:-	AL353807.3	NA	M2,	NA	Promoter Flanking Region,	3	1398	lnc-YY1AP1-2	lnc-YY1AP1-2:1	j	NONHSAG003081.2	NONHSAT006754.2	j	-	-	u
MK280600	LHRI_LNC1441.1	LHRI_LNC1441	8	123251131	123263632	+	8:123251131-123263632:+	RNU6-628P,ZHX1-C8orf76	NA	M2,M0,	M1,	Enhancer,Promoter Flanking Region,	5	1322	lnc-C8orf76-1	lnc-C8orf76-1:4	x	NONHSAG051171.2	NONHSAT128531.2	i	-	-	u
MK279948	LHRI_LNC98.1	LHRI_LNC98	1	58629929	58630231	-	1:58629929-58630231:-	AL035411.1	NA	M2,M1,	NA	Open chromatin,	1	303	lnc-FGGY-11	lnc-FGGY-11:1	x	NONHSAG001616.2	NONHSAT003509.2	x	-	-	u
MK280299	LHRI_LNC513.1	LHRI_LNC513	2	109128251	109129241	+	2:109128251-109129241:+	SH3RF3-AS1	M0,M1,	M0,M2,	NA	Promoter Flanking Region,Promoter,	1	991	SH3RF3-AS1	SH3RF3-AS1:3	x	NONHSAG028883.1	NONHSAT073106.1	k	SH3RF3-AS1	ENST00000567491.1	x	yes
MK279942	LHRI_LNC1801.1	LHRI_LNC1801	1	21429753	21432065	+	1:21429753-21432065:+	HS6ST1P1	NA	M2,M1,M0,	NA	Promoter,	1	2313	lnc-NBPF3-10	lnc-NBPF3-10:1	k	NONHSAG000589.1	NONHSAT001394.1	i	-	-	u
MN297980	LHRI_LNC802.2	LHRI_LNC802	3	45076473	45143415	+	3:45076473-45143415:+	CDCP1	NA	M1,M0,M2,	M1,	CTCF Binding Site,Promoter Flanking Region,Open chromatin,	4	1279	lnc-CLEC3B-4	lnc-CLEC3B-4:1	o	NONHSAG034929.2	NONHSAT193829.1	y	-	-	u
MK280651	LHRI_LNC1636.1	LHRI_LNC1636	X	47509804	47512463	-	X:47509804-47512463:-	NUS1P1	NA	M1,M2,	NA	TF binding site,Promoter,	1	2660	lnc-ZNF41-2	lnc-ZNF41-2:1	c	NONHSAG054392.1	NONHSAT136889.1	e	-	-	u
MN298307	LHRI_LNC1186.1	LHRI_LNC1186	6	52995628	52995923	-	6:52995628-52995923:-	RF00100	M1,	NA	NA	Promoter,	1	296	lnc-FBXO9-1	lnc-FBXO9-1:3	x	NONHSAG043942.2	NONHSAT113149.2	x	-	-	u
MN296863	LHRI_LNC539.1	LHRI_LNC539	1	146300093	146301549	+	1:146300093-146301549:+	NUDT4P2	M0,M1,	M2,M1,M0,	M1,M0,	Promoter,	1	1457	-	-	u	-	-	u	-	-	u		Yes
MK280185	LHRI_LNC93.1	LHRI_LNC93	16	21794095	21799094	-	16:21794095-21799094:-	AC092375.2	NA	M2,M1,M0,	NA	Promoter Flanking Region,	4	3040	lnc-NPIPB4-1	lnc-NPIPB4-1:1	k	NONHSAG018849.2	NONHSAT141010.2	k	AC092375.2	ENST00000567370.1	k	yes
MK280007	LHRI_LNC1713.1	LHRI_LNC1713	10	29698226	29698539	+	10:29698226-29698539:+	SVIL	NA	M1,M0,M2,	NA	NA	1	314	lnc-LYZL1-12	lnc-LYZL1-12:1	o	NONHSAG005499.1	NONHSAT012518.1	o	-	-	u
MN298304	LHRI_LNC1182.1	LHRI_LNC1182	6	44298726	44299406	-	6:44298726-44299406:-	TMEM151B	NA	M0,M1,M2,	NA	Promoter Flanking Region,	1	681	lnc-TCTE1-1	lnc-TCTE1-1:1	p	-	-	u	-	-	u
MN298296	LHRI_LNC1167.1	LHRI_LNC1167	6	33364820	33365123	-	6:33364820-33365123:-	LYPLA2P1	NA	M0,M1,M2,	NA	Enhancer,	1	304	-	-	u	-	-	u	-	-	u		Yes
MN297725	LHRI_LNC542.1	LHRI_LNC542	2	151446960	151447236	-	2:151446960-151447236:-	RIF1	NA	M2,M1,M0,	NA	NA	1	277	-	-	u	-	-	u	-	-	u		Yes
MK280048	LHRI_LNC1821.1	LHRI_LNC1821	11	58578473	58579106	+	11:58578473-58579106:+	NA	M1,M0,	NA	M1,M0,	Promoter,	1	634	-	-	u	-	-	u	-	-	u		Yes
MK280451	LHRI_LNC990.1	LHRI_LNC990	4	140756374	140757023	-	4:140756374-140757023:-	AC096733.2	M0,M1,	NA	M0,M1,M2,	Promoter,	1	650	lnc-ELMOD2-4	lnc-ELMOD2-4:1	x	NONHSAG038973.2	NONHSAT098512.2	x	AC096733.2	ENST00000609937.1	x	yes
MK280327	LHRI_LNC577.1	LHRI_LNC577	2	197379375	197379637	-	2:197379375-197379637:-	NPM1P46	NA	NA	NA	Promoter Flanking Region,Open chromatin,CTCF Binding Site,	1	263	lnc-SF3B1-2	lnc-SF3B1-2:1	p	NONHSAG030173.2	NONHSAT076216.2	p	-	-	u
MN297465	LHRI_LNC217.20	LHRI_LNC217	17	43245312	43273292	-	17:43245312-43273292:-	RF00004	M1,	M2,	M0,M2,M1,	Promoter,	3	554	lnc-LINC00854-1	lnc-LINC00854-1:21	i	NONHSAG021969.1	NONHSAT054028.1	x	-	-	u
MN298350	LHRI_LNC1226.1	LHRI_LNC1226	6	147203743	147204085	+	6:147203743-147204085:+	STXBP5-AS1	M1,M0,	NA	NA	Promoter,	1	343	STXBP5-AS1	STXBP5-AS1:34	x	NONHSAG093708.1	NONHSAT208213.1	o	STXBP5-AS1	ENST00000427394.5	i	yes
MN297718	LHRI_LNC532.1	LHRI_LNC532	2	131421196	131421422	-	2:131421196-131421422:-	NA	NA	M1,M0,M2,	NA	Open chromatin,	1	227	lnc-MZT2A-19	lnc-MZT2A-19:1	c	-	-	u	-	-	u
MK280669	LHRI_LNC1669.1	LHRI_LNC1669	X	105408288	105408634	+	X:105408288-105408634:+	IL1RAPL2	NA	M1,M0,M2,	NA	NA	1	347	-	-	u	-	-	u	-	-	u		Yes
MN297437	LHRI_LNC194.1	LHRI_LNC194	17	31550068	31550306	+	17:31550068-31550306:+	NA	M1,M0,	NA	NA	Promoter Flanking Region,	1	239	-	-	u	NONHSAG021499.1	NONHSAT052979.1	i	-	-	u
MK280077	LHRI_LNC1882.5	LHRI_LNC1882	11	110371802	110375463	-	11:110371802-110375463:-	AP000924.1	NA	NA	M1,M0,	Promoter Flanking Region,	3	610	lnc-FDX1-1	lnc-FDX1-1:1	i	NONHSAG009576.2	NONHSAT024072.2	i	AP000924.1	ENST00000526605.5	i	Yes?
MK280350	LHRI_LNC664.1	LHRI_LNC664	20	50191516	50192172	-	20:50191516-50192172:-	CEBPB	M1,M0,	M1,M0,M2,	M0,M2,M1,	Promoter,	1	657	CEBPB-AS1	CEBPB-AS1:1	e	NONHSAG082017.1	NONHSAT189782.1	e	-	-	u
MN297638	LHRI_LNC432.6	LHRI_LNC432	2	32916229	32916606	-	2:32916229-32916606:-	LINC00486	NA	M2,M0,M1,	NA	TF binding site,	2	236	LINC00486	LINC00486:4	i	NONHSAG027432.2	NONHSAT069993.2	x	LINC00486	ENST00000414054.5	i	yes
MN296962	LHRI_LNC1710.14	LHRI_LNC1710	10	29409618	29457853	+	10:29409618-29457853:+	SVIL-AS1	M1,M0,	NA	NA	Promoter,CTCF Binding Site,	3	300	lnc-LYZL1-15	lnc-LYZL1-15:15	j	NONHSAG005499.2	NONHSAT012523.2	j	-	-	u
MK280289	LHRI_LNC488.21	LHRI_LNC488	2	87455496	87521413	+	2:87455496-87521413:+	AC133644.3,CYTOR	M1,	M2,	M0,	Promoter,	3	558	CYTOR	CYTOR:84	c	NONHSAG028438.2	NONHSAT072150.2	j	AC133644.3	ENST00000646855.1	j	yes
MN297619	LHRI_LNC408.1	LHRI_LNC408	19	57845233	57906754	-	19:57845233-57906754:-	ZNF587B	NA	M1,M0,M2,	NA	NA	2	3823	lnc-ZNF587-1	lnc-ZNF587-1:1	x	NONHSAG076274.1	NONHSAT179989.1	x	AC010326.3	ENST00000597780.1	y	yes
MN297983	LHRI_LNC802.5	LHRI_LNC802	3	45076485	45102038	+	3:45076485-45102038:+	CDCP1	NA	M2,M0,M1,	M1,	Promoter Flanking Region,Open chromatin,CTCF Binding Site,	3	23542	lnc-CLEC3B-4	lnc-CLEC3B-4:1	k	NONHSAG034929.2	NONHSAT193829.1	o	-	-	u
MK280353	LHRI_LNC671.2	LHRI_LNC671	20	62594254	62605710	-	20:62594254-62605710:-	BX640514.2	NA	NA	M1,	Promoter Flanking Region,	3	3635	lnc-GATA5-5	lnc-GATA5-5:2	k	NONHSAG032242.2	NONHSAT189956.1	k	BX640514.2	ENST00000617730.1	k	yes
MN298596	LHRI_LNC1514.1	LHRI_LNC1514	9	63832049	63859602	-	9:63832049-63859602:-	FRG1JP	NA	M2,	NA	Promoter,	8	972	lnc-FOXD4L5-18	lnc-FOXD4L5-18:4	j	NONHSAG052453.2	NONHSAT131626.2	j	-	-	u
MN297436	LHRI_LNC201.1	LHRI_LNC201	17	31347039	31348650	+	17:31347039-31348650:+	NF1	NA	M1,M0,M2,	NA	Promoter,Open chromatin,	1	1612	-	-	u	-	-	u	-	-	u		Yes
MK280089	LHRI_LNC1908.10	LHRI_LNC1908	12	6447830	6451502	-	12:6447830-6451502:-	CD27-AS1	M0,M1,	M1,M0,M2,	M0,M1,	Promoter,	4	1113	CD27-AS1	CD27-AS1:3	j	NONHSAG010301.2	NONHSAT026072.2	j	CD27-AS1	ENST00000545339.5	j	yes
MN297941	LHRI_LNC768.25	LHRI_LNC768	3	9385836	9397504	-	3:9385836-9397504:-	THUMPD3-AS1	M1,M0,	M0,M1,M2,	M0,M1,	Promoter,	5	1853	THUMPD3-AS1	THUMPD3-AS1:41	j	NONHSAG034363.2	NONHSAT087766.2	j	THUMPD3-AS1	ENST00000519043.5	j	yes
MK280652	LHRI_LNC1637.1	LHRI_LNC1637	X	47905898	47906552	-	X:47905898-47906552:-	ZNF81	NA	M1,M0,M2,	NA	CTCF Binding Site,	1	655	-	-	u	-	-	u	-	-	u		Yes
MN297383	LHRI_LNC138.1	LHRI_LNC138	16	72210737	72286866	+	16:72210737-72286866:+	LINC01572	NA	M1,	M1,	NA	3	398	LINC01572	LINC01572:25	x	NONHSAG019920.2	NONHSAT143557.2	x	LINC01572	ENST00000624829.3	x	Yes?
MK280024	LHRI_LNC1761.2	LHRI_LNC1761	10	87760301	87803765	+	10:87760301-87803765:+	ATAD1	NA	M0,M1,M2,	NA	Enhancer,	4	2270	-	-	u	-	-	u	-	-	u		Yes
MK280653	LHRI_LNC1638.1	LHRI_LNC1638	X	47906838	47907577	+	X:47906838-47907577:+	ZNF81	NA	M0,M1,M2,	NA	CTCF Binding Site,	1	740	-	-	u	-	-	u	-	-	u		Yes
MK280159	LHRI_LNC2110.1	LHRI_LNC2110	15	34496070	34496291	+	15:34496070-34496291:+	FSCN1P1	NA	M2,M0,M1,	NA	TF binding site,	1	222	-	-	u	NONHSAG016484.1	NONHSAT041566.1	i	-	-	u
MN298382	LHRI_LNC1267.30	LHRI_LNC1267	7	30561562	30594758	-	7:30561562-30594758:-	AC005154.1	M0,M1,	M2,M1,M0,	M0,M1,	Promoter,	10	3877	lnc-GGCT-1	lnc-GGCT-1:31	j	NONHSAG047260.2	NONHSAT119880.2	j	GARS-DT	ENST00000426529.6	j	yes
MN298140	LHRI_LNC997.1	LHRI_LNC997	4	153708379	153710624	+	4:153708379-153710624:+	RNF175	NA	M1,M0,M2,	NA	Promoter Flanking Region,	1	2246	lnc-TLR2-2	lnc-TLR2-2:1	p	NONHSAG039131.1	NONHSAT098816.1	i	-	-	u
MN297007	LHRI_LNC1778.1	LHRI_LNC1778	10	102880621	102880928	-	10:102880621-102880928:-	BORCS7-ASMT	NA	M2,M1,M0,	NA	NA	1	308	-	-	u	NONHSAG006704.1	NONHSAT016012.1	i	-	-	u
MN298576	LHRI_LNC1489.1	LHRI_LNC1489	9	35657755	35658012	+	9:35657755-35658012:+	RMRP	M0,M1,	M2,M1,M0,	M0,	Promoter,	1	258	lnc-ARHGEF39-1	lnc-ARHGEF39-1:1	x	NONHSAG052119.1	NONHSAT130962.1	x	RMRP	ENST00000602361.1	x	yes
MK280514	LHRI_LNC1235.1	LHRI_LNC1235	6	163616410	163661522	-	6:163616410-163661522:-	NA	NA	NA	M1,	Promoter Flanking Region,	3	2565	lnc-QKI-7	lnc-QKI-7:1	x	NONHSAG093798.1	NONHSAT208403.1	x	-	-	u
MN297952	LHRI_LNC772.12	LHRI_LNC772	3	11202596	11225932	-	3:11202596-11225932:-	HRH1	M0,M1,	M1,M0,M2,	M1,M0,	Open chromatin,Enhancer,Promoter,	4	4770	lnc-VGLL4-9	lnc-VGLL4-9:3	j	NONHSAG085340.1	NONHSAT195410.1	j	AC083855.2	ENST00000648436.1	j	yes
MN297818	LHRI_LNC656.7	LHRI_LNC656	20	40694000	40889426	-	20:40694000-40889426:-	AL035665.1,RNA5SP484,NA	NA	NA	NA	Promoter Flanking Region,	5	1439	lnc-MAFB-1	lnc-MAFB-1:1	j	NONHSAG031780.2	NONHSAT079742.2	j	AL035665.1	ENST00000428495.2	y	yes
MK280449	LHRI_LNC981.1	LHRI_LNC981	4	122075807	122076392	-	4:122075807-122076392:-	AC097533.1	NA	M1,M0,M2,	NA	Enhancer,	1	586	lnc-TRPC3-2	lnc-TRPC3-2:3	p	NONHSAG038796.2	NONHSAT098157.2	p	-	-	u
MK280079	LHRI_LNC1881.4	LHRI_LNC1881	11	110375524	110407665	+	11:110375524-110407665:+	AP000924.1	NA	NA	M1,M0,	Promoter Flanking Region,	2	1619	lnc-FDX1-1	lnc-FDX1-1:1	j	NONHSAG009576.2	NONHSAT024073.2	j	AP000924.1	ENST00000526605.5	j	Yes?
MN298539	LHRI_LNC1449.5	LHRI_LNC1449	8	131839731	131852646	-	8:131839731-131852646:-	NA	NA	NA	NA	Open chromatin,	3	3271	-	-	u	-	-	u	-	-	u		Yes
MN297539	LHRI_LNC296.1	LHRI_LNC296	18	60014675	60014924	-	18:60014675-60014924:-	SINHCAFP2	NA	M2,	NA	NA	1	250	-	-	u	-	-	u	-	-	u		Yes
MK280058	LHRI_LNC1843.5	LHRI_LNC1843	11	65499042	65503609	+	11:65499042-65503609:+	MALAT1,RF01871,RF01684	M1,M0,	M2,M0,M1,	M0,M1,M2,	Promoter,	5	2189	MALAT1	MALAT1:47	j	NONHSAG008675.2	NONHSAT022126.2	j	MALAT1	ENST00000508832.2	j	yes
MN296955	LHRI_LNC1699.1	LHRI_LNC1699	10	12158342	12177421	-	10:12158342-12177421:-	SEC61A2	NA	M1,M0,M2,	NA	NA	2	291	lnc-UPF2-4	lnc-UPF2-4:1	y	NONHSAG005244.1	NONHSAT011444.1	x	-	-	u
MK280127	LHRI_LNC2016.1	LHRI_LNC2016	13	41384021	41384707	-	13:41384021-41384707:-	TUBBP2	NA	M2,	M1,	CTCF Binding Site,Open chromatin,	1	687	-	-	u	NONHSAG013310.1	NONHSAT033348.1	i	-	-	u
MN298429	LHRI_LNC1323.1	LHRI_LNC1323	7	102619620	102691579	+	7:102619620-102691579:+	AC105052.1,RASA4DP	NA	M2,M1,M0,	NA	Open chromatin,Promoter,	2	907	lnc-POLR2J2-1	lnc-POLR2J2-1:1	x	NONHSAG048438.1	NONHSAT122529.1	x	AC105052.4	ENST00000639209.1	x	yes
MK280349	LHRI_LNC662.7	LHRI_LNC662	20	49278642	49289260	+	20:49278642-49289260:+	RF02216	M1,M0,	M1,M0,M2,	M1,M0,	Promoter,	3	8956	ZFAS1	ZFAS1:2	j	NONHSAG031976.2	NONHSAT080207.2	j	ZFAS1	ENST00000450535.5	j	yes
MK280067	LHRI_LNC1858.1	LHRI_LNC1858	11	70294532	70314972	-	11:70294532-70314972:-	PPFIA1	NA	M2,M0,M1,	M0,M1,	Promoter Flanking Region,	3	3740	lnc-CTTN-8	lnc-CTTN-8:1	x	NONHSAG062928.1	NONHSAT159359.1	x	AP002336.2	ENST00000528607.1	i	yes
MK280103	LHRI_LNC1938.1	LHRI_LNC1938	12	31613246	31615540	-	12:31613246-31615540:-	DENND5B-AS1	NA	M2,M0,M1,	NA	Promoter,	1	2295	DENND5B-AS1	DENND5B-AS1:5	i	NONHSAG010814.2	NONHSAT027559.2	x	DENND5B-AS1	ENST00000537346.1	x	yes
MN297801	LHRI_LNC638.9	LHRI_LNC638	20	30377203	30417489	+	20:30377203-30417489:+	FRG1BP	M1,	M2,	NA	Promoter,	8	878	lnc-DEFB115-5	lnc-DEFB115-5:2	j	NONHSAG031565.2	NONHSAT079276.2	j	-	-	u
MN297129	LHRI_LNC1915.12	LHRI_LNC1915	12	9645316	9657043	+	12:9645316-9657043:+	AC092821.3	NA	NA	M1,	Promoter,CTCF Binding Site,	5	564	lnc-CLEC2D-8	lnc-CLEC2D-8:7	j	NONHSAG010453.2	NONHSAT026838.2	j	AC092821.3	ENST00000641304.1	j	yes
MN297974	LHRI_LNC797.1	LHRI_LNC797	3	42782966	42784071	-	3:42782966-42784071:-	AC099329.3	NA	M2,M1,M0,	NA	NA	1	1106	lnc-HIGD1A-1	lnc-HIGD1A-1:5	p	NONHSAG034879.1	NONHSAT089262.1	i	AC099329.1	ENST00000629885.1	p	yes
MK280086	LHRI_LNC1899.1	LHRI_LNC1899	12	1788942	1789330	-	12:1788942-1789330:-	NA	NA	M2,M1,M0,	NA	Enhancer,CTCF Binding Site,	1	389	-	-	u	-	-	u	-	-	u		Yes
MN297756	LHRI_LNC583.1	LHRI_LNC583	2	203221393	203225076	+	2:203221393-203225076:+	NBEAL1	NA	M2,M0,M1,	NA	NA	1	3684	-	-	u	NONHSAG030277.1	NONHSAT076453.1	x	-	-	u
MK280056	LHRI_LNC1842.8	LHRI_LNC1842	11	65422804	65445394	+	11:65422804-65445394:+	RF01957,RF01956	M1,M0,	M2,M0,M1,	M1,M0,	Promoter,	4	21120	NEAT1	NEAT1:18	k	NONHSAG008695.1	NONHSAT022201.1	k	NEAT1	ENST00000646243.1	j	yes
MN297140	LHRI_LNC1928.1	LHRI_LNC1928	12	16321528	16352748	-	12:16321528-16352748:-	MGST1	NA	M1,M0,M2,	NA	Promoter Flanking Region,	7	1579	lnc-MGST1-6	lnc-MGST1-6:1	x	NONHSAG010597.2	NONHSAT161904.1	x	-	-	u
MN297982	LHRI_LNC802.3	LHRI_LNC802	3	45076473	45212851	+	3:45076473-45212851:+	CDCP1	NA	M1,M0,M2,	M1,	Open chromatin,Promoter Flanking Region,CTCF Binding Site,	7	1007	lnc-CLEC3B-4	lnc-CLEC3B-4:1	o	NONHSAG084613.1	NONHSAT193832.1	j	-	-	u
MK280108	LHRI_LNC1954.1	LHRI_LNC1954	12	53142768	53143054	+	12:53142768-53143054:+	HIGD1AP1	NA	M0,	NA	CTCF Binding Site,Open chromatin,	1	287	lnc-SOAT2-1	lnc-SOAT2-1:1	p	NONHSAG011217.2	NONHSAT028414.2	p	-	-	u
MN297394	LHRI_LNC152.1	LHRI_LNC152	16	80979030	81031485	+	16:80979030-81031485:+	AC092718.4	NA	M2,M0,M1,	NA	NA	2	488	lnc-ATMIN-1	lnc-ATMIN-1:1	o	NONHSAG020090.2	NONHSAT143930.2	o	AC092718.4	ENST00000566639.1	o	yes
MK280066	LHRI_LNC1857.1	LHRI_LNC1857	11	69641123	69641432	-	11:69641123-69641432:-	CCND1	M1,	M2,M0,M1,	NA	Promoter,	1	310	-	-	u	NONHSAG008898.1	NONHSAT022618.1	i	-	-	u
MN297727	LHRI_LNC548.1	LHRI_LNC548	2	151796659	151798686	-	2:151796659-151798686:-	ARL5A	NA	M2,M1,M0,	NA	NA	1	2028	-	-	u	-	-	u	-	-	u		Yes
MN298642	LHRI_LNC1548.1	LHRI_LNC1548	9	103205351	103205649	+	9:103205351-103205649:+	LINC01492	NA	M1,M0,M2,	NA	NA	1	299	lnc-CYLC2-4	lnc-CYLC2-4:1	e	NONHSAG053082.2	NONHSAT133773.2	e	LINC01492	ENST00000411575.5	i	yes
MN297508	LHRI_LNC266.1	LHRI_LNC266	17	76557359	76565343	+	17:76557359-76565343:+	SNHG16	M1,M0,	M2,M1,M0,	M0,M1,	Promoter,	5	2909	SNHG16	SNHG16:11	j	NONHSAG022825.2	NONHSAT056046.2	j	SNHG16	ENST00000590435.5	j	yes
MN298062	LHRI_LNC898.3	LHRI_LNC898	3	183447651	183455541	+	3:183447651-183455541:+	LINC00888	M1,	NA	NA	Promoter Flanking Region,Promoter,	4	1177	lnc-B3GNT5-11	lnc-B3GNT5-11:10	j	NONHSAG036820.2	NONHSAT093646.2	j	-	-	u
MN297403	LHRI_LNC161.1	LHRI_LNC161	17	1562560	1562795	+	17:1562560-1562795:+	PITPNA	M0,M1,	M2,M1,	NA	Promoter,	1	236	-	-	u	NONHSAG072880.1	NONHSAT174751.1	o	-	-	u
MK280418	LHRI_LNC855.1	LHRI_LNC855	3	129361039	129365562	-	3:129361039-129365562:-	NA	NA	M2,M1,M0,	NA	CTCF Binding Site,Open chromatin,	1	4524	-	-	u	-	-	u	-	-	u		Yes
MN298606	LHRI_LNC1523.2	LHRI_LNC1523	9	72163297	72291846	-	9:72163297-72291846:-	GDA,AL135924.1,NA	NA	M0,M2,	M0,	CTCF Binding Site,Promoter Flanking Region,	6	1781	lnc-GDA-3	lnc-GDA-3:1	x	NONHSAG052553.2	NONHSAT131854.2	x	AL135924.2	ENST00000427901.1	x	yes
MK280534	LHRI_LNC1267.46	LHRI_LNC1267	7	30568833	30594743	-	7:30568833-30594743:-	AC005154.1	M0,M1,	M0,M1,M2,	M1,M0,	Promoter,	7	6708	lnc-GGCT-1	lnc-GGCT-1:31	j	NONHSAG047260.2	NONHSAT119880.2	j	GARS-DT	ENST00000426529.6	j	yes
MN296912	LHRI_LNC1230.1	LHRI_LNC1230	1	204506527	204506887	+	1:204506527-204506887:+	NA	M1,	NA	NA	Promoter Flanking Region,	1	361	lnc-MDM4-11	lnc-MDM4-11:1	k	NONHSAG004033.1	NONHSAT008954.1	i	-	-	u
MK280255	LHRI_LNC291.1	LHRI_LNC291	18	26167857	26170291	-	18:26167857-26170291:-	PSMA8	NA	M0,M1,M2,	NA	Promoter,	1	2435	lnc-SS18-8	lnc-SS18-8:1	c	-	-	u	-	-	u
MK280371	LHRI_LNC694.1	LHRI_LNC694	21	34836254	34885061	+	21:34836254-34885061:+	RUNX1	NA	M1,M0,M2,	M0,M1,M2,	Promoter Flanking Region,	3	1536	lnc-RCAN1-5	lnc-RCAN1-5:2	x	NONHSAG032707.1	NONHSAT081791.1	x	-	-	u
MN297702	LHRI_LNC517.28	LHRI_LNC517	2	111429323	111493926	-	2:111429323-111493926:-	MIR4435-2HG,AC017002.6	NA	M2,M0,M1,	M2,M1,M0,	Promoter,	2	401	MIR4435-2HG	MIR4435-2HG:38	j	NONHSAG056025.2	NONHSAT073639.2	j	AC017002.6	ENST00000644013.1	j	yes
MN298485	LHRI_LNC1381.1	LHRI_LNC1381	8	22953632	22969156	-	8:22953632-22969156:-	PEBP4,RN7SL303P	NA	M2,	NA	NA	2	268	lnc-RHOBTB2-1	lnc-RHOBTB2-1:1	x	NONHSAG049751.1	NONHSAT125539.1	x	-	-	u
MK280458	LHRI_LNC1050.1	LHRI_LNC1050	5	66349885	66440482	-	5:66349885-66440482:-	NA	NA	M1,	NA	Promoter Flanking Region,Open chromatin,	2	1680	lnc-SGTB-4	lnc-SGTB-4:7	c	NONHSAG040547.2	NONHSAT101789.2	c	-	-	u
MN298562	LHRI_LNC1477.1	LHRI_LNC1477	9	6008086	6008471	-	9:6008086-6008471:-	NA	M0,M1,	M2,M0,M1,	M0,	Promoter,	1	386	-	-	u	-	-	u	-	-	u		Yes
MN297249	LHRI_LNC2064.2	LHRI_LNC2064	14	49853631	49862842	+	14:49853631-49862842:+	AL627171.2	M0,M1,	M0,M1,M2,	M1,M0,	Promoter,	2	277	lnc-ARF6-1	lnc-ARF6-1:2	o	NONHSAG014890.2	NONHSAT036750.2	o	AL627171.2	ENST00000635177.1	x	yes
MK280573	LHRI_LNC1375.3	LHRI_LNC1375	8	1761121	1763297	-	8:1761121-1763297:-	AC100810.1	M0,M1,	M0,M1,M2,	M1,M0,	Promoter,Open chromatin,	2	1970	lnc-ERICH1-19	lnc-ERICH1-19:17	j	NONHSAG049366.2	NONHSAT124679.2	j	AC100810.1	ENST00000518822.1	j	yes
MN298175	LHRI_LNC1033.2	LHRI_LNC1033	5	42974467	42993563	-	5:42974467-42993563:-	PRELID3BP6,NA	M1,M0,	NA	M0,M1,	Promoter Flanking Region,	4	3274	lnc-ANXA2R-1	lnc-ANXA2R-1:5	j	NONHSAG040294.2	NONHSAT101241.2	j	-	-	u
MN298691	LHRI_LNC1632.1	LHRI_LNC1632	X	41675094	41675389	-	X:41675094-41675389:-	CASK	NA	M0,M1,M2,	NA	NA	1	296	-	-	u	NONHSAG054309.1	NONHSAT136744.1	i	-	-	u
MN297004	LHRI_LNC1772.1	LHRI_LNC1772	10	99707452	99707836	+	10:99707452-99707836:+	CUTC	NA	M2,M0,M1,	NA	Open chromatin,	1	385	-	-	u	-	-	u	-	-	u		Yes
MN297005	LHRI_LNC1773.1	LHRI_LNC1773	10	99709408	99711320	+	10:99709408-99711320:+	CUTC	NA	M0,M1,M2,	NA	Open chromatin,	1	1913	-	-	u	-	-	u	-	-	u		Yes
MN296963	LHRI_LNC1711.1	LHRI_LNC1711	10	29459750	29461367	+	10:29459750-29461367:+	SVIL	NA	M0,M1,M2,	NA	NA	1	1618	lnc-LYZL1-14	lnc-LYZL1-14:1	e	NONHSAG005499.2	NONHSAT012523.2	i	-	-	u
MN297424	LHRI_LNC187.1	LHRI_LNC187	17	19063346	19190245	-	17:19063346-19190245:-	SNORD3B-2	NA	NA	M0,	Promoter,	3	960	lnc-GRAP-1	lnc-GRAP-1:1	o	NONHSAG021085.2	NONHSAT146423.2	o	AC007952.4	ENST00000573866.2	o	yes
MN297453	LHRI_LNC217.5	LHRI_LNC217	17	43233434	43273292	-	17:43233434-43273292:-	RF00004	M1,	M2,	M1,M2,M0,	Promoter,	4	545	lnc-LINC00854-1	lnc-LINC00854-1:21	i	NONHSAG021967.1	NONHSAT054022.1	o	-	-	u
MN297019	LHRI_LNC1792.1	LHRI_LNC1792	10	133235969	133236382	+	10:133235969-133236382:+	NA	NA	NA	NA	Promoter Flanking Region,	1	414	-	-	u	-	-	u	-	-	u		Yes
MK280151	LHRI_LNC2090.1	LHRI_LNC2090	14	96223363	96223562	+	14:96223363-96223562:+	BDKRB2	NA	M2,	NA	Enhancer,	1	200	lnc-BDKRB1-3	lnc-BDKRB1-3:1	p	NONHSAG015806.1	NONHSAT039495.1	c	-	-	u
MN298380	LHRI_LNC1263.2	LHRI_LNC1263	7	23275471	23282023	+	7:23275471-23282023:+	NA	NA	M1,M0,M2,	NA	Promoter Flanking Region,CTCF Binding Site,	2	5320	lnc-IGF2BP3-1	lnc-IGF2BP3-1:1	i	NONHSAG096981.1	NONHSAT213264.1	i	-	-	u
MN297459	LHRI_LNC217.12	LHRI_LNC217	17	43239585	43273292	-	17:43239585-43273292:-	RF00004	M1,	M2,	M1,M2,M0,	Promoter,	4	528	lnc-LINC00854-1	lnc-LINC00854-1:21	i	NONHSAG021969.1	NONHSAT054028.1	x	-	-	u
MN297743	LHRI_LNC565.4	LHRI_LNC565	2	189923989	189924879	+	2:189923989-189924879:+	HNRNPCP2	NA	M2,M0,M1,	NA	Promoter,	2	865	lnc-PMS1-2	lnc-PMS1-2:1	o	NONHSAG030074.1	NONHSAT076046.1	i	-	-	u
MK280426	LHRI_LNC873.1	LHRI_LNC873	3	148984175	148984866	-	3:148984175-148984866:-	UBQLN4P1	NA	M2,M1,M0,	NA	NA	1	692	-	-	u	-	-	u	-	-	u		Yes
MK279962	LHRI_LNC356.1	LHRI_LNC356	1	111380658	111380888	+	1:111380658-111380888:+	HIGD1AP12	NA	M1,	NA	NA	1	231	lnc-PIFO-2	lnc-PIFO-2:2	p	NONHSAG002402.2	NONHSAT005176.2	p	-	-	u
MN297031	LHRI_LNC1807.1	LHRI_LNC1807	11	9758291	9813458	+	11:9758291-9813458:+	SBF2-AS1	M0,M1,	NA	M0,M1,M2,	Promoter,	3	2041	lnc-SBF2-2	lnc-SBF2-2:1	x	NONHSAG007631.2	NONHSAT017941.2	j	SBF2-AS1	ENST00000650092.1	j	yes
MN297095	LHRI_LNC1872.1	LHRI_LNC1872	11	93535830	93536113	+	11:93535830-93536113:+	SMCO4	NA	M0,M1,M2,	NA	Promoter Flanking Region,	1	284	lnc-SMCO4-1	lnc-SMCO4-1:1	i	NONHSAG009368.2	NONHSAT023647.2	i	-	-	u
MN298406	LHRI_LNC1288.20	LHRI_LNC1288	7	66654586	66669609	+	7:66654586-66669609:+	AC006001.2	M1,M0,	M2,M0,M1,	M1,M2,M0,	Promoter,	5	873	lnc-KCTD7-2	lnc-KCTD7-2:12	j	NONHSAG047850.2	NONHSAT121214.2	j	AC006001.2	ENST00000439360.5	j	yes
MN297009	LHRI_LNC1780.1	LHRI_LNC1780	10	107894781	107895104	+	10:107894781-107895104:+	LINC01435	NA	M2,	NA	NA	1	324	lnc-SORCS1-11	lnc-SORCS1-11:1	i	NONHSAG006824.2	NONHSAT016288.2	i	LINC01435	ENST00000596263.5	i	yes
MK280204	LHRI_LNC127.1	LHRI_LNC127	16	66947946	66948152	+	16:66947946-66948152:+	AC009084.1	M0,M1,	NA	NA	CTCF Binding Site,Promoter Flanking Region,	1	207	-	-	u	NONHSAG019705.2	NONHSAT143059.2	i	AC009084.1	ENST00000566869.1	i	yes
MN297598	LHRI_LNC378.1	LHRI_LNC378	19	45527805	45528701	+	19:45527805-45528701:+	OPA3	NA	M2,M1,M0,	NA	TF binding site,Promoter Flanking Region,	1	897	-	-	u	NONHSAG026015.1	NONHSAT066744.1	e	-	-	u
MN297995	LHRI_LNC817.1	LHRI_LNC817	3	50651298	50655859	+	3:50651298-50655859:+	NA	NA	M1,M0,M2,	NA	Enhancer,CTCF Binding Site,	1	4562	-	-	u	NONHSAG035134.1	NONHSAT089851.1	o	-	-	u
MK280447	LHRI_LNC976.1	LHRI_LNC976	4	118554242	118556023	+	4:118554242-118556023:+	CEP170P1	NA	M2,M0,M1,	NA	NA	1	1782	-	-	u	NONHSAG038720.1	NONHSAT097959.1	i	-	-	u
MN297381	LHRI_LNC136.1	LHRI_LNC136	16	72203729	72206524	+	16:72203729-72206524:+	NA	NA	NA	M1,M0,	Promoter Flanking Region,	3	345	-	-	u	-	-	u	-	-	u		Yes
MN298044	LHRI_LNC874.1	LHRI_LNC874	3	148985389	148985658	-	3:148985389-148985658:-	UBQLN4P1	NA	M2,M0,M1,	NA	Promoter,	1	270	-	-	u	-	-	u	-	-	u		Yes
MK280150	LHRI_LNC2089.1	LHRI_LNC2089	14	95185611	95193728	+	14:95185611-95193728:+	CLMN	NA	M2,M0,	M0,M1,	Promoter Flanking Region,	3	3981	lnc-DICER1-5	lnc-DICER1-5:3	x	NONHSAG015789.2	NONHSAT039429.2	x	AL356017.1	ENST00000556796.1	x	yes
MK279980	LHRI_LNC781.1	LHRI_LNC781	1	155212335	155212887	-	1:155212335-155212887:-	MTX1	NA	M1,M0,M2,	NA	Open chromatin,	1	553	lnc-THBS3-1	lnc-THBS3-1:1	i	NONHSAG003059.1	NONHSAT006713.1	i	AC234582.2	ENST00000455788.1	i	yes
MN297189	LHRI_LNC1992.1	LHRI_LNC1992	12	110281621	110281883	-	12:110281621-110281883:-	ATP2A2	M1,M0,	M2,M0,M1,	M0,M1,	Promoter Flanking Region,Promoter,	1	263	-	-	u	-	-	u	-	-	u		Yes
MK280219	LHRI_LNC185.1	LHRI_LNC185	17	18534660	18535001	-	17:18534660-18535001:-	AC107983.2	NA	NA	NA	CTCF Binding Site,	1	342	lnc-TBC1D28-7	lnc-TBC1D28-7:5	i	NONHSAG021063.2	NONHSAT176008.1	i	FAM106A	ENST00000425211.5	i	yes
MN297731	LHRI_LNC550.1	LHRI_LNC550	2	161339505	161340433	-	2:161339505-161340433:-	PSMD14	NA	M0,M1,M2,	NA	Promoter,	1	929	lnc-DPP4-9	lnc-DPP4-9:1	k	NONHSAG029671.2	NONHSAT075176.2	k	-	-	u
MN298613	LHRI_LNC1523.10	LHRI_LNC1523	9	72227010	72291846	-	9:72227010-72291846:-	GDA,AL135924.1,NA	NA	M2,M0,	M0,	Promoter Flanking Region,CTCF Binding Site,	4	1683	lnc-GDA-3	lnc-GDA-3:1	x	NONHSAG052553.2	NONHSAT131854.2	x	AL135924.2	ENST00000427901.1	x	yes
MK279944	LHRI_LNC1935.11	LHRI_LNC1935	1	28578546	28581818	-	1:28578546-28581818:-	SNORA16A	M1,M0,	M2,M0,M1,	M1,M0,	Promoter,	5	1159	SNHG12	SNHG12:1	j	NONHSAG000840.2	NONHSAT001975.2	j	SNHG12	ENST00000648127.1	j	yes
MN298069	LHRI_LNC909.1	LHRI_LNC909	3	196631819	196632310	-	3:196631819-196632310:-	LINC01063	M1,M0,	M2,M0,M1,	M0,M2,M1,	Enhancer,Promoter,	1	492	LINC01063	LINC01063:4	c	NONHSAG037128.1	NONHSAT094364.1	x	LINC01063	ENST00000441644.1	i	yes
MN297576	LHRI_LNC347.1	LHRI_LNC347	19	20643476	20644571	-	19:20643476-20644571:-	ZNF626	NA	M1,M0,M2,	NA	NA	1	1096	lnc-ZNF626-1	lnc-ZNF626-1:1	i	NONHSAG025234.1	NONHSAT063661.1	i	AC010636.2	ENST00000595094.1	i	yes
MK280622	LHRI_LNC1511.1	LHRI_LNC1511	9	62817949	62818694	-	9:62817949-62818694:-	NA	NA	M1,M0,M2,	NA	CTCF Binding Site,	1	746	-	-	u	-	-	u	-	-	u		Yes
MN297923	LHRI_LNC745.1	LHRI_LNC745	22	41830912	41832162	+	22:41830912-41832162:+	AL021453.1	M1,M0,	NA	M1,M0,	CTCF Binding Site,Enhancer,Promoter,	1	1251	SREBF2-AS1	SREBF2-AS1:6	x	NONHSAG034027.2	NONHSAT086984.2	x	SREBF2-AS1	ENST00000333487.2	x	yes
MK280445	LHRI_LNC965.1	LHRI_LNC965	4	77819748	77820281	-	4:77819748-77820281:-	NA	M0,M1,	NA	M2,M1,M0,	Promoter,	1	534	-	-	u	NONHSAG088375.1	NONHSAT200111.1	o	-	-	u
MN298459	LHRI_LNC1355.3	LHRI_LNC1355	7	143407857	143415820	+	7:143407857-143415820:+	EPHA1-AS1	NA	NA	NA	Open chromatin,Promoter,Promoter Flanking Region,	4	572	EPHA1-AS1	EPHA1-AS1:1	j	NONHSAG049041.2	NONHSAT123872.2	j	EPHA1-AS1	ENST00000429289.5	j	yes
MK280654	LHRI_LNC1640.2	LHRI_LNC1640	X	52825957	52853112	-	X:52825957-52853112:-	AC244505.1	NA	NA	NA	Promoter Flanking Region,	3	2931	lnc-SPANXN5-2	lnc-SPANXN5-2:3	j	NONHSAG054533.2	NONHSAT137119.2	j	-	-	u
MK280676	LHRI_LNC1683.1	LHRI_LNC1683	X	150230843	150231059	-	X:150230843-150231059:-	XRCC6P2	NA	M2,M0,M1,	NA	Open chromatin,	1	217	-	-	u	-	-	u	-	-	u		Yes
MN297429	LHRI_LNC191.2	LHRI_LNC191	17	20844064	20844462	+	17:20844064-20844462:+	ABHD17AP6	NA	M2,M1,	NA	Promoter Flanking Region,	2	351	lnc-CDRT15L2-7	lnc-CDRT15L2-7:1	o	NONHSAG021176.2	NONHSAT146836.2	o	-	-	u
MN298004	LHRI_LNC826.1	LHRI_LNC826	3	56692720	56693640	+	3:56692720-56693640:+	NA	NA	NA	M0,	Promoter Flanking Region,Enhancer,	1	921	-	-	u	-	-	u	-	-	u		Yes
MK280145	LHRI_LNC2078.1	LHRI_LNC2078	14	73567117	73569845	-	14:73567117-73569845:-	ACOT2	M0,M1,	M0,M1,M2,	M0,M1,M2,	Promoter,CTCF Binding Site,	1	2729	lnc-HEATR4-6	lnc-HEATR4-6:1	k	NONHSAG015421.2	NONHSAT037719.2	k	-	-	u
MN297532	LHRI_LNC286.1	LHRI_LNC286	18	10261541	10276833	+	18:10261541-10276833:+	NA	NA	NA	NA	Enhancer,	3	872	-	-	u	-	-	u	-	-	u		Yes
MN296848	LHRI_LNC393.1	LHRI_LNC393	1	114914511	114914835	-	1:114914511-114914835:-	SYCP1	NA	M2,M1,M0,	NA	NA	1	325	-	-	u	-	-	u	-	-	u		Yes
MN298442	LHRI_LNC1336.1	LHRI_LNC1336	7	130909430	130911758	-	7:130909430-130911758:-	LINC00513	M1,M0,	M0,M1,M2,	M1,M0,	Promoter,	1	2329	LINC-PINT	LINC-PINT:30	c	NONHSAG048817.2	NONHSAT123371.2	x	LINC00513	ENST00000447430.1	x	yes
MN297641	LHRI_LNC433.3	LHRI_LNC433	2	32916230	32916565	+	2:32916230-32916565:+	LINC00486	NA	M2,M1,M0,	NA	TF binding site,	2	295	LINC00486	LINC00486:21	i	NONHSAG078589.1	NONHSAT184447.1	x	LINC00486	ENST00000414054.5	i	yes
MN297820	LHRI_LNC656.17	LHRI_LNC656	20	40696499	40889426	-	20:40696499-40889426:-	AL035665.1,RNA5SP484,NA	NA	NA	NA	Promoter Flanking Region,	9	2713	lnc-MAFB-1	lnc-MAFB-1:1	j	NONHSAG031780.2	NONHSAT079742.2	j	AL035665.1	ENST00000428495.2	k	yes
MK280229	LHRI_LNC1685.1	LHRI_LNC1685	X	154816713	154817097	-	X:154816713-154817097:-	MPP1	NA	M2,	NA	CTCF Binding Site,Open chromatin,	1	385	lnc-SMIM9-2	lnc-SMIM9-2:3	c	NONHSAG055613.2	NONHSAT139215.2	c	-	-	u
MN297651	LHRI_LNC443.7	LHRI_LNC443	2	39437431	39584798	+	2:39437431-39584798:+	AC007388.1	M1,M0,	M2,M0,M1,	M0,M1,	Promoter,	7	782	lnc-TMEM178A-1	lnc-TMEM178A-1:2	j	NONHSAG027544.2	NONHSAT070231.2	j	AC007388.1	ENST00000426083.5	j	yes
MK280682	LHRI_LNC1691.6	LHRI_LNC1691	Y	7333605	7335492	+	Y:7333605-7335492:+	PRKY	NA	NA	NA	NA	1	1888	lnc-TBL1Y-10	lnc-TBL1Y-10:1	i	NONHSAG055696.1	NONHSAT139360.1	i	-	-	u
MN298011	LHRI_LNC833.6	LHRI_LNC833	3	75422718	75435035	-	3:75422718-75435035:-	FAM86DP	M0,M1,	M2,M0,M1,	NA	Promoter,	5	780	lnc-ZNF717-4	lnc-ZNF717-4:2	j	NONHSAG035446.2	NONHSAT090525.2	j	-	-	u
MN298529	LHRI_LNC1438.1	LHRI_LNC1438	8	117968579	117968857	+	8:117968579-117968857:+	EXT1	NA	M2,	NA	Promoter Flanking Region,	1	279	-	-	u	NONHSAG051094.1	NONHSAT128385.1	i	-	-	u
MN296780	LHRI_LNC811.1	LHRI_LNC811	1	8894187	8894401	+	1:8894187-8894401:+	HMGN2P17	NA	NA	NA	NA	1	215	lnc-CA6-3	lnc-CA6-3:1	p	NONHSAG000303.2	NONHSAT000773.2	p	-	-	u
MN298395	LHRI_LNC1277.5	LHRI_LNC1277	7	45724209	45769013	-	7:45724209-45769013:-	SEPT7P2	M0,M1,	M0,M1,M2,	NA	Promoter,	12	2240	lnc-IGFBP3-4	lnc-IGFBP3-4:1	j	NONHSAG047517.2	NONHSAT120453.2	j	-	-	u
MN297110	LHRI_LNC1894.1	LHRI_LNC1894	11	126296240	126298152	+	11:126296240-126298152:+	AP001318.2	NA	M0,M1,M2,	NA	NA	1	1913	lnc-SRPRA-3	lnc-SRPRA-3:1	i	NONHSAG009990.2	NONHSAT160877.1	i	AP001318.2	ENST00000524964.1	i	yes
MK280647	LHRI_LNC1621.1	LHRI_LNC1621	X	23077182	23078387	+	X:23077182-23078387:+	PTCHD1-AS	NA	M1,M0,M2,	NA	Promoter,CTCF Binding Site,	1	1206	lnc-DDX53-3	lnc-DDX53-3:1	c	NONHSAG054148.2	NONHSAT136478.2	i	PTCHD1-AS	ENST00000608254.1	i	yes
MN297055	LHRI_LNC1836.16	LHRI_LNC1836	11	62852297	62855460	-	11:62852297-62855460:-	SNHG1,SNORD25,SNORD27	M1,M0,	M2,M0,M1,	NA	Promoter,	9	958	SNHG1	SNHG1:3	j	NONHSAG008552.2	NONHSAT021826.2	j	SNHG1	ENST00000541578.5	j	Yes
MN296853	LHRI_LNC448.3	LHRI_LNC448	1	120232899	120244304	+	1:120232899-120244304:+	AC244669.2	M0,M1,	M2,	NA	Promoter Flanking Region,	2	908	-	-	u	-	-	u	-	-	u		Yes
MN297958	LHRI_LNC777.1	LHRI_LNC777	3	15341577	15345601	+	3:15341577-15345601:+	NA	NA	NA	NA	Open chromatin,Enhancer,	2	2173	-	-	u	-	-	u	-	-	u		Yes
MN298675	LHRI_LNC1608.1	LHRI_LNC1608	MT	1	575	+	MT:1-575:+	NA	NA	NA	NA	CTCF Binding Site,	1	575	-	-	u	NONHSAG053890.1	NONHSAT135776.1	x	-	-	u
MN298605	LHRI_LNC1523.1	LHRI_LNC1523	9	72163278	72291846	-	9:72163278-72291846:-	GDA,AL135924.1,NA	NA	M2,M0,	M0,	CTCF Binding Site,Promoter Flanking Region,	3	1154	lnc-GDA-3	lnc-GDA-3:1	x	NONHSAG052553.2	NONHSAT131854.2	x	AL135924.2	ENST00000427901.1	x	yes
MN297256	LHRI_LNC2069.8	LHRI_LNC2069	14	58265382	58268619	-	14:58265382-58268619:-	PSMA3-AS1	NA	M1,M0,M2,	NA	NA	2	2496	PSMA3-AS1	PSMA3-AS1:27	j	NONHSAG015097.2	NONHSAT037119.2	j	PSMA3-AS1	ENST00000554360.5	j	yes
MN298584	LHRI_LNC1502.1	LHRI_LNC1502	9	40318733	40319203	+	9:40318733-40319203:+	BX664727.3	NA	M2,	NA	NA	1	471	lnc-ANKRD20A2-3	lnc-ANKRD20A2-3:1	c	NONHSAG101332.1	NONHSAT219510.1	c	BX664727.3	ENST00000421686.6	i	yes
MK280413	LHRI_LNC837.1	LHRI_LNC837	3	98705857	98732648	-	3:98705857-98732648:-	ST3GAL6-AS1	M0,M1,	M2,M1,M0,	M2,M1,	Promoter Flanking Region,Promoter,	6	3151	ST3GAL6-AS1	ST3GAL6-AS1:14	j	NONHSAG035574.2	NONHSAT090811.2	j	ST3GAL6-AS1	ENST00000488132.5	j	Yes?
MK280271	LHRI_LNC397.1	LHRI_LNC397	19	54096138	54096830	+	19:54096138-54096830:+	OSCAR	NA	M2,M0,M1,	NA	CTCF Binding Site,Promoter,	1	693	-	-	u	-	-	u	-	-	u		Yes
MN296816	LHRI_LNC150.1	LHRI_LNC150	1	64093872	64171286	-	1:64093872-64171286:-	ROR1-AS1	NA	M2,M0,M1,	NA	Enhancer,Promoter Flanking Region,	4	1718	ROR1-AS1	ROR1-AS1:3	j	NONHSAG001712.2	NONHSAT003701.2	j	ROR1-AS1	ENST00000412349.6	j	yes
MN298232	LHRI_LNC1112.2	LHRI_LNC1112	5	160468268	160493464	+	5:160468268-160493464:+	MIR146A	M0,M1,	M2,M1,M0,	M1,M0,	Promoter,	2	20347	MIR3142HG	MIR3142HG:3	o	NONHSAG042117.1	NONHSAT104873.1	o	MIR3142HG	ENST00000517927.1	o	yes
MK280143	LHRI_LNC2060.1	LHRI_LNC2060	14	39216520	39216874	+	14:39216520-39216874:+	YTHDF2P1	NA	M2,M0,M1,	NA	Open chromatin,Enhancer,	1	355	-	-	u	-	-	u	-	-	u		Yes
MN298678	LHRI_LNC1613.1	LHRI_LNC1613	X	305366	449714	+	X:305366-449714:+	PPP2R3B	NA	M1,M0,M2,	NA	NA	3	242	lnc-GTPBP6-1	lnc-GTPBP6-1:1	x	NONHSAG053909.1	NONHSAT136029.1	x	AL732314.4	ENST00000627627.3	y	yes
MK280551	LHRI_LNC1296.2	LHRI_LNC1296	7	77421194	77425463	+	7:77421194-77425463:+	AC004921.1	NA	NA	M0,	Promoter Flanking Region,	5	720	lnc-CCDC146-96	lnc-CCDC146-96:4	j	NONHSAG096453.1	NONHSAT212270.1	j	AC004921.1	ENST00000608884.1	j	Yes?
MN296840	LHRI_LNC343.6	LHRI_LNC343	1	110508127	110728410	+	1:110508127-110728410:+	KCNA2,KCNA3	NA	M2,M0,	M0,M1,	Promoter Flanking Region,	5	7693	lnc-PROK1-4	lnc-PROK1-4:3	j	NONHSAG002390.2	NONHSAT149585.1	j	AL365361.1	ENST00000566942.1	x	yes
MN298649	LHRI_LNC1557.1	LHRI_LNC1557	9	115427560	115427798	-	9:115427560-115427798:-	AL691420.1	NA	M1,	NA	NA	1	239	lnc-TNC-21	lnc-TNC-21:1	i	-	-	u	AL691420.1	ENST00000646338.1	i	yes
MN297749	LHRI_LNC574.1	LHRI_LNC574	2	191676454	191677880	-	2:191676454-191677880:-	NA	M0,M1,	M0,	M1,M0,	Promoter,	1	1427	lnc-CAVIN2-2	lnc-CAVIN2-2:1	c	NONHSAG079311.1	NONHSAT186104.1	e	-	-	u
MK280073	LHRI_LNC1873.1	LHRI_LNC1873	11	102034539	102034750	-	11:102034539-102034750:-	NA	NA	NA	NA	NA	1	212	-	-	u	NONHSAG009466.1	NONHSAT023869.1	i	-	-	u
MN297807	LHRI_LNC649.1	LHRI_LNC649	20	35262310	35262698	-	20:35262310-35262698:-	MMP24	NA	M0,M1,M2,	NA	CTCF Binding Site,Promoter Flanking Region,	1	389	lnc-MMP24OS-73	lnc-MMP24OS-73:9	i	NONHSAG031666.2	NONHSAT079476.2	i	AL121753.2	ENST00000624581.1	p	Yes?
MK280472	LHRI_LNC1098.1	LHRI_LNC1098	5	143334154	143334648	+	5:143334154-143334648:+	NR3C1	NA	M0,M1,M2,	NA	NA	1	495	lnc-ARHGAP26-8	lnc-ARHGAP26-8:1	c	-	-	u	-	-	u
MN296993	LHRI_LNC1758.1	LHRI_LNC1758	10	87243489	87243831	-	10:87243489-87243831:-	NUTM2A-AS1	NA	M0,M1,M2,	NA	NA	1	343	NUTM2A-AS1	NUTM2A-AS1:29	c	NONHSAG006407.1	NONHSAT015345.1	x	NUTM2A-AS1	ENST00000433920.5	i	yes
MN298633	LHRI_LNC1536.2	LHRI_LNC1536	9	94166267	94172897	+	9:94166267-94172897:+	MIRLET7A1,AL158152.2	M1,M0,	NA	M1,M0,	Promoter,	2	3830	lnc-ZNF169-7	lnc-ZNF169-7:1	j	NONHSAG052890.2	NONHSAT133286.2	j	AL158152.2	ENST00000602703.1	j	yes
MN297056	LHRI_LNC1838.2	LHRI_LNC1838	11	64176834	64185692	-	11:64176834-64185692:-	STIP1	M1,	M1,M0,M2,	M1,M0,	Promoter,	3	3080	lnc-MACROD1-1	lnc-MACROD1-1:8	j	NONHSAG008588.2	NONHSAT021944.2	j	-	-	u
MN298432	LHRI_LNC1315.1	LHRI_LNC1315	7	103099823	103103139	+	7:103099823-103103139:+	NAPEPLD	NA	M1,M0,M2,	NA	NA	1	3317	lnc-NAPEPLD-1	lnc-NAPEPLD-1:1	x	NONHSAG048452.1	NONHSAT122556.1	i	-	-	u
MN298224	LHRI_LNC1104.1	LHRI_LNC1104	5	151273562	151276874	+	5:151273562-151276874:+	SLC36A3	NA	M0,M1,M2,	NA	Open chromatin,	1	3313	-	-	u	NONHSAG041966.2	NONHSAT104607.2	i	-	-	u
MN298717	LHRI_LNC1677.4	LHRI_LNC1677	X	132264118	132283032	+	X:132264118-132283032:+	RAP2C-AS1	NA	NA	NA	NA	2	1972	RAP2C-AS1	RAP2C-AS1:12	i	NONHSAG103587.1	NONHSAT223030.1	k	RAP2C-AS1	ENST00000441399.2	i	Yes
MN297928	LHRI_LNC753.3	LHRI_LNC753	22	45134363	45163781	-	22:45134363-45163781:-	NUP50-DT	M1,M0,	M1,M0,M2,	M0,	Promoter,	3	792	NUP50-DT	NUP50-DT:35	j	NONHSAG034128.2	NONHSAT192976.1	j	NUP50-DT	ENST00000426282.6	j	yes
MK280016	LHRI_LNC1737.1	LHRI_LNC1737	10	70822848	70823844	-	10:70822848-70823844:-	SGPL1	NA	M1,M0,M2,	NA	NA	1	997	-	-	u	NONHSAG006097.1	NONHSAT013773.1	i	-	-	u
MN297979	LHRI_LNC803.1	LHRI_LNC803	3	45058311	45192489	+	3:45058311-45192489:+	CDCP1	NA	NA	NA	Enhancer,Promoter Flanking Region,	3	3541	lnc-TMEM158-2	lnc-TMEM158-2:1	x	NONHSAG034929.1	NONHSAT089386.1	o	-	-	u
MN298311	LHRI_LNC1191.1	LHRI_LNC1191	6	71166408	71166642	+	6:71166408-71166642:+	LYPLA1P3	NA	M0,M2,	NA	Open chromatin,	1	235	lnc-OGFRL1-10	lnc-OGFRL1-10:1	i	NONHSAG093331.1	NONHSAT207472.1	i	-	-	u
MN298629	LHRI_LNC1531.1	LHRI_LNC1531	9	92151144	92151434	+	9:92151144-92151434:+	AL354751.2	NA	M1,M2,	NA	Promoter,Enhancer,	1	291	lnc-CENPP-20	lnc-CENPP-20:5	c	NONHSAG052839.2	NONHSAT133175.2	x	-	-	u
MN297534	LHRI_LNC290.1	LHRI_LNC290	18	23523608	23524889	-	18:23523608-23524889:-	RMC1	NA	M0,M1,M2,	NA	Open chromatin,	1	1282	-	-	u	-	-	u	-	-	u		Yes
MK280583	LHRI_LNC1397.1	LHRI_LNC1397	8	54161997	54208672	+	8:54161997-54208672:+	AC060764.1,NA	NA	NA	NA	NA	3	1146	lnc-LYPLA1-4	lnc-LYPLA1-4:1	x	NONHSAG099451.1	NONHSAT217044.1	x	-	-	u
MN297930	LHRI_LNC754.1	LHRI_LNC754	22	45183618	45187186	-	22:45183618-45187186:-	NUP50	NA	M2,M1,M0,	NA	NA	1	3569	-	-	u	-	-	u	-	-	u		Yes
MN296894	LHRI_LNC1006.1	LHRI_LNC1006	1	171270209	171270441	-	1:171270209-171270441:-	FMO1	NA	M1,M0,M2,	NA	CTCF Binding Site,	1	233	-	-	u	-	-	u	-	-	u		Yes
MN297521	LHRI_LNC281.6	LHRI_LNC281	18	3466297	3478976	+	18:3466297-3478976:+	GAPLINC	NA	M1,M0,	M0,	Promoter Flanking Region,	4	615	GAPLINC	GAPLINC:8	j	NONHSAG023235.2	NONHSAT056995.2	j	GAPLINC	ENST00000579007.5	j	yes
MN298470	LHRI_LNC1371.1	LHRI_LNC1371	8	208033	212972	-	8:208033-212972:-	RPL23AP53	NA	M1,M0,	NA	Enhancer,	1	4940	lnc-OR4F21-1	lnc-OR4F21-1:8	o	NONHSAG049334.2	NONHSAT124573.2	o	-	-	u
MK280307	LHRI_LNC523.3	LHRI_LNC523	2	113831188	113863386	-	2:113831188-113863386:-	AC104653.1	NA	NA	NA	Promoter Flanking Region,	5	631	lnc-SLC35F5-3	lnc-SLC35F5-3:11	j	NONHSAG029033.2	NONHSAT073841.2	j	AC104653.1	ENST00000446401.1	k	yes
MK279979	LHRI_LNC756.1	LHRI_LNC756	1	154945976	154946266	+	1:154945976-154946266:+	PBXIP1	NA	M0,M1,M2,	NA	Promoter Flanking Region,TF binding site,CTCF Binding Site,	1	291	lnc-PMVK-1	lnc-PMVK-1:1	x	NONHSAG003032.2	NONHSAT006646.2	c	-	-	u
MK280318	LHRI_LNC551.1	LHRI_LNC551	2	164573515	164573743	-	2:164573515-164573743:-	AC107075.1	NA	M2,M1,M0,	NA	NA	1	229	-	-	u	-	-	u	-	-	u		Yes
MN298607	LHRI_LNC1523.4	LHRI_LNC1523	9	72178509	72291846	-	9:72178509-72291846:-	GDA,AL135924.1,NA	NA	M2,M0,	M0,	CTCF Binding Site,Promoter Flanking Region,	5	2850	lnc-GDA-3	lnc-GDA-3:1	x	NONHSAG052553.2	NONHSAT131854.2	x	AL135924.2	ENST00000427901.1	x	yes
MN297681	LHRI_LNC490.1	LHRI_LNC490	2	91747145	91747518	-	2:91747145-91747518:-	AC027612.1	NA	M2,M0,M1,	NA	CTCF Binding Site,Promoter Flanking Region,	1	374	lnc-ANKRD20A8P-5	lnc-ANKRD20A8P-5:1	o	NONHSAG028529.2	NONHSAT072376.2	o	-	-	u
MN297058	LHRI_LNC1839.1	LHRI_LNC1839	11	64308941	64311608	+	11:64308941-64311608:+	ESRRA	M0,M1,	M0,M1,M2,	NA	Promoter,	2	1107	-	-	u	-	-	u	-	-	u		Yes
MN296895	LHRI_LNC1017.1	LHRI_LNC1017	1	171532508	171532888	-	1:171532508-171532888:-	PRRC2C	NA	M0,M1,M2,	NA	Open chromatin,	1	381	-	-	u	NONHSAG056961.1	NONHSAT150042.1	x	-	-	u
MK280424	LHRI_LNC865.1	LHRI_LNC865	3	136331934	136332589	+	3:136331934-136332589:+	PCCB	NA	M0,M1,M2,	NA	Open chromatin,	1	656	-	-	u	NONHSAG084979.1	NONHSAT194508.1	p	-	-	u
MN297011	LHRI_LNC1782.1	LHRI_LNC1782	10	110990217	110990579	+	10:110990217-110990579:+	SHOC2	NA	M0,M1,M2,	NA	Open chromatin,	2	244	-	-	u	-	-	u	-	-	u		Yes
MK279955	LHRI_LNC205.2	LHRI_LNC205	1	84574553	84583620	+	1:84574553-84583620:+	AL359762.1	M0,	M2,M0,M1,	M2,M1,M0,	Promoter,Promoter Flanking Region,	3	1006	lnc-SPATA1-2	lnc-SPATA1-2:1	j	NONHSAG001954.2	NONHSAT149276.1	j	AL359762.1	ENST00000646567.1	j	yes
MN297064	LHRI_LNC1842.12	LHRI_LNC1842	11	65423125	65445420	+	11:65423125-65445420:+	RF01957,RF01956	M1,M0,	M1,M0,M2,	M1,M0,	Promoter,	3	21173	NEAT1	NEAT1:18	k	NONHSAG008695.1	NONHSAT022201.1	k	NEAT1	ENST00000646243.1	j	yes
MN296858	LHRI_LNC474.1	LHRI_LNC474	1	120794957	120798602	+	1:120794957-120798602:+	NBPF26	NA	M2,M0,M1,	NA	Enhancer,Promoter Flanking Region,Open chromatin,	1	3646	-	-	u	-	-	u	-	-	u		Yes
MN297405	LHRI_LNC163.1	LHRI_LNC163	17	1715666	1715911	-	17:1715666-1715911:-	MIR22HG	M1,M0,	M2,M1,M0,	M0,M1,	Promoter,	1	246	MIR22HG	MIR22HG:36	c	NONHSAG020474.2	NONHSAT144854.2	i	MIR22HG	ENST00000334146.7	i	yes
MK280306	LHRI_LNC522.6	LHRI_LNC522	2	113611779	113627090	-	2:113611779-113627090:-	AL078621.3,RPL23AP7	M1,M0,	M2,M1,M0,	NA	Promoter,	3	1203	lnc-SLC35F5-14	lnc-SLC35F5-14:10	k	NONHSAG029024.2	NONHSAT073816.2	j	-	-	u
MK280509	LHRI_LNC1218.1	LHRI_LNC1218	6	136756543	136765127	+	6:136756543-136765127:+	MAP3K5	NA	M2,M1,M0,	NA	Enhancer,Promoter Flanking Region,Open chromatin,	3	1637	-	-	u	NONHSAG044931.1	NONHSAT115129.1	i	-	-	u
MN298295	LHRI_LNC1166.1	LHRI_LNC1166	6	33130752	33143555	-	6:33130752-33143555:-	HLA-DPA3	NA	M2,	NA	Open chromatin,CTCF Binding Site,	4	1033	lnc-COL11A2-1	lnc-COL11A2-1:1	j	NONHSAG043591.2	NONHSAT108969.2	j	-	-	u
MN297901	LHRI_LNC712.1	LHRI_LNC712	22	17589839	17591827	-	22:17589839-17591827:-	SLC25A18	NA	M0,M1,M2,	NA	NA	1	1989	lnc-ATP6V1E1-2	lnc-ATP6V1E1-2:2	p	NONHSAG033193.1	NONHSAT083191.1	p	-	-	u
MK280529	LHRI_LNC1264.21	LHRI_LNC1264	7	24761300	24762053	-	7:24761300-24762053:-	NA	NA	M1,M0,	NA	CTCF Binding Site,	2	304	lnc-GSDME-1	lnc-GSDME-1:1	c	NONHSAG047136.2	NONHSAT119576.2	c	-	-	u
MK280295	LHRI_LNC507.1	LHRI_LNC507	2	99311859	99316150	-	2:99311859-99316150:-	AC079447.1	NA	M2,M1,M0,	NA	NA	1	4292	-	-	u	NONHSAG028692.2	NONHSAT072748.2	x	-	-	u
MN297321	LHRI_LNC56.1	LHRI_LNC56	15	90079012	90079465	-	15:90079012-90079465:-	ZNF710	NA	M2,M0,M1,	NA	NA	1	454	ZNF710-AS1	ZNF710-AS1:6	i	NONHSAG017838.1	NONHSAT048327.1	x	ZNF710-AS1	ENST00000558334.1	i	yes
MK279954	LHRI_LNC188.1	LHRI_LNC188	1	75742960	75743239	-	1:75742960-75743239:-	ACADM	NA	M0,M1,M2,	NA	Open chromatin,	1	280	-	-	u	-	-	u	-	-	u		Yes
MN297623	LHRI_LNC414.1	LHRI_LNC414	2	9773132	9779779	-	2:9773132-9779779:-	NA	NA	NA	NA	Promoter Flanking Region,Enhancer,CTCF Binding Site,	4	644	-	-	u	NONHSAG078443.1	NONHSAT184195.1	j	-	-	u
MK280270	LHRI_LNC394.1	LHRI_LNC394	19	52558096	52561515	+	19:52558096-52561515:+	ZNF808	NA	M2,M1,M0,	NA	NA	1	3420	lnc-ZNF83-6	lnc-ZNF83-6:1	x	NONHSAG026395.1	NONHSAT067511.1	i	-	-	u
MK280675	LHRI_LNC1680.1	LHRI_LNC1680	X	140033497	140033853	+	X:140033497-140033853:+	HNRNPA3P3	NA	M0,M1,M2,	NA	CTCF Binding Site,	1	357	lnc-F9-4	lnc-F9-4:1	o	NONHSAG055428.2	NONHSAT138789.2	o	-	-	u
MK280042	LHRI_LNC1812.20	LHRI_LNC1812	11	21912540	22121817	+	11:21912540-22121817:+	NA,AC107882.1	NA	M0,	NA	NA	7	999	lnc-ANO5-2	lnc-ANO5-2:2	j	NONHSAG007845.2	NONHSAT018380.2	j	AC107882.1	ENST00000530837.1	y	yes
MN298583	LHRI_LNC1495.1	LHRI_LNC1495	9	40090956	40092164	-	9:40090956-40092164:-	FGF7P3	NA	M0,M1,M2,	NA	NA	1	1209	lnc-CNTNAP3-24	lnc-CNTNAP3-24:1	i	NONHSAG052263.2	NONHSAT131277.2	i	AL772307.1	ENST00000639363.1	i	yes
MN298391	LHRI_LNC1271.5	LHRI_LNC1271	7	38341615	38373585	+	7:38341615-38373585:+	TRG-AS1	NA	M1,M0,	NA	CTCF Binding Site,Promoter Flanking Region,	5	1070	TRG-AS1	TRG-AS1:7	j	NONHSAG047376.2	NONHSAT120179.2	j	TRG-AS1	ENST00000629357.1	j	yes
MN297800	LHRI_LNC635.1	LHRI_LNC635	20	25359140	25359444	+	20:25359140-25359444:+	ABHD12	NA	M1,M0,M2,	NA	Enhancer,Promoter Flanking Region,	1	305	-	-	u	-	-	u	-	-	u		Yes
MK280232	LHRI_LNC220.1	LHRI_LNC220	17	44178687	44179762	-	17:44178687-44179762:-	ASB16	NA	M1,M0,M2,	NA	NA	1	1076	ASB16-AS1	ASB16-AS1:9	i	NONHSAG021911.2	NONHSAT053905.2	i	ASB16-AS1	ENST00000585457.5	i	Yes?
MN298325	LHRI_LNC1215.1	LHRI_LNC1215	6	134174965	134176584	+	6:134174965-134176584:+	SGK1	M0,M1,	M0,M1,M2,	M0,M1,	Promoter,	1	1620	lnc-SLC2A12-7	lnc-SLC2A12-7:1	i	NONHSAG044880.1	NONHSAT115003.1	o	-	-	u
MK280117	LHRI_LNC1982.1	LHRI_LNC1982	12	96052597	96053556	+	12:96052597-96053556:+	NA	NA	NA	M1,M0,	Promoter Flanking Region,	2	363	-	-	u	NONHSAG064956.1	NONHSAT162612.1	i	-	-	u
MN297247	LHRI_LNC2063.5	LHRI_LNC2063	14	49853621	50202176	-	14:49853621-50202176:-	RN7SL2,RN7SL3	NA	M1,M0,M2,	NA	NA	3	499	lnc-NEMF-1	lnc-NEMF-1:5	o	NONHSAG014892.2	NONHSAT036752.2	o	AL627171.1	ENST00000618845.1	x	yes
MN296898	LHRI_LNC1108.1	LHRI_LNC1108	1	182834851	182835868	+	1:182834851-182835868:+	NA	NA	M0,M1,M2,	NA	NA	1	1018	lnc-NPL-2	lnc-NPL-2:2	c	NONHSAG003676.2	NONHSAT008336.2	c	-	-	u
MN297740	LHRI_LNC560.1	LHRI_LNC560	2	184600807	184601095	+	2:184600807-184601095:+	ZNF804A	M0,M1,	NA	M1,M0,	Promoter,	1	289	-	-	u	-	-	u	-	-	u		Yes
MN296859	LHRI_LNC476.1	LHRI_LNC476	1	120825494	120827233	+	1:120825494-120827233:+	NBPF26	NA	M0,M1,M2,	NA	NA	2	200	-	-	u	-	-	u	-	-	u		Yes
MK280553	LHRI_LNC1296.5	LHRI_LNC1296	7	77421270	77425443	+	7:77421270-77425443:+	AC004921.1	NA	NA	M0,	Promoter Flanking Region,	5	947	lnc-CCDC146-96	lnc-CCDC146-96:4	j	NONHSAG096453.1	NONHSAT212270.1	j	AC004921.1	ENST00000608884.1	j	Yes?
MN297840	LHRI_LNC674.1	LHRI_LNC674	20	63860276	63860677	-	20:63860276-63860677:-	AL118506.1	NA	M2,M1,M0,	NA	Promoter Flanking Region,	1	402	lnc-ZBTB46-2	lnc-ZBTB46-2:3	p	NONHSAG032312.2	NONHSAT080948.2	p	AL118506.1	ENST00000601296.2	p	yes
MN297035	LHRI_LNC1811.1	LHRI_LNC1811	11	10884214	10884506	-	11:10884214-10884506:-	ZBED5-AS1	NA	M1,M0,M2,	NA	Open chromatin,CTCF Binding Site,	1	293	lnc-ZBED5-1	lnc-ZBED5-1:8	c	NONHSAG007653.2	NONHSAT018007.2	c	ZBED5-AS1	ENST00000530344.1	i	yes
MK280582	LHRI_LNC1397.2	LHRI_LNC1397	8	54161997	54208672	+	8:54161997-54208672:+	AC060764.1,NA	NA	NA	NA	NA	2	989	lnc-LYPLA1-4	lnc-LYPLA1-4:1	x	NONHSAG099451.1	NONHSAT217044.1	x	-	-	u
MN297227	LHRI_LNC2045.1	LHRI_LNC2045	14	20683234	20683607	+	14:20683234-20683607:+	NA	M1,	NA	M0,M1,	Promoter,	1	374	-	-	u	-	-	u	-	-	u		Yes
MK280624	LHRI_LNC1518.1	LHRI_LNC1518	9	66269454	66286280	+	9:66269454-66286280:+	NA	M1,	NA	NA	CTCF Binding Site,Promoter Flanking Region,	2	2594	-	-	u	-	-	u	-	-	u		Yes
MN297360	LHRI_LNC97.1	LHRI_LNC97	16	22612543	22613774	-	16:22612543-22613774:-	AC009021.1	NA	M0,M1,M2,	M0,	Open chromatin,CTCF Binding Site,	1	1232	lnc-CDR2-3	lnc-CDR2-3:1	e	NONHSAG018876.2	NONHSAT141086.2	e	AC009021.1	ENST00000566098.1	e	yes
MK280383	LHRI_LNC734.1	LHRI_LNC734	22	32743193	32753741	+	22:32743193-32753741:+	SYN3	NA	M0,M1,	NA	Promoter Flanking Region,	1	10549	lnc-BPIFC-4	lnc-BPIFC-4:1	x	NONHSAG033747.1	NONHSAT084957.1	x	-	-	u
MN296817	LHRI_LNC150.10	LHRI_LNC150	1	64139894	64171288	-	1:64139894-64171288:-	ROR1-AS1	NA	M2,M0,M1,	NA	Enhancer,Promoter Flanking Region,	4	657	ROR1-AS1	ROR1-AS1:1	j	NONHSAG001712.2	NONHSAT003703.2	j	ROR1-AS1	ENST00000424995.1	j	yes
MK280078	LHRI_LNC1881.3	LHRI_LNC1881	11	110375514	110407665	+	11:110375514-110407665:+	AP000924.1	NA	NA	M1,M0,	Promoter Flanking Region,	3	1725	lnc-FDX1-1	lnc-FDX1-1:1	j	NONHSAG009576.2	NONHSAT024073.2	j	AP000924.1	ENST00000526605.5	j	Yes?
MN296862	LHRI_LNC531.1	LHRI_LNC531	1	146038032	146038298	+	1:146038032-146038298:+	NA	M1,M0,	NA	NA	Promoter,	1	267	-	-	u	NONHSAG002718.1	NONHSAT005972.1	i	-	-	u
MN297413	LHRI_LNC174.1	LHRI_LNC174	17	8190627	8190839	+	17:8190627-8190839:+	BORCS6	M0,M1,	M1,	M1,M0,	Promoter,	1	213	LINC00324	LINC00324:3	i	NONHSAG072936.1	NONHSAT174844.1	e	AC129492.7	ENST00000622992.1	p	Yes?
MN297833	LHRI_LNC667.1	LHRI_LNC667	20	53593042	53593410	-	20:53593042-53593410:-	ZNF217	M1,M0,	NA	M1,M0,	Promoter,	1	369	lnc-ZNF217-5	lnc-ZNF217-5:1	i	-	-	u	-	-	u
MN297270	LHRI_LNC2091.1	LHRI_LNC2091	14	100031420	100061395	-	14:100031420-100061395:-	AL157912.1	NA	NA	NA	Enhancer,	4	1014	lnc-DEGS2-4	lnc-DEGS2-4:1	j	NONHSAG015882.2	NONHSAT039642.2	j	AL157912.1	ENST00000554245.1	j	yes
MN298653	LHRI_LNC1563.1	LHRI_LNC1563	9	127725283	127725559	-	9:127725283-127725559:-	TTC16	NA	NA	NA	TF binding site,	1	277	-	-	u	-	-	u	-	-	u		Yes
MN298239	LHRI_LNC1123.1	LHRI_LNC1123	5	178922649	178922908	-	5:178922649-178922908:-	PIGFP1	NA	M2,M0,	NA	NA	1	260	lnc-ZFP2-1	lnc-ZFP2-1:1	i	NONHSAG042404.2	NONHSAT105544.2	i	-	-	u
MN297371	LHRI_LNC116.1	LHRI_LNC116	16	33695654	33695945	-	16:33695654-33695945:-	BMS1P8	NA	M2,M0,M1,	NA	NA	1	292	lnc-TP53TG3-34	lnc-TP53TG3-34:2	o	NONHSAG019245.2	NONHSAT142101.2	o	-	-	u
MN298265	LHRI_LNC1138.28	LHRI_LNC1138	6	6784391	6801246	-	6:6784391-6801246:-	AL031123.1,BTF3P7	NA	M2,	M0,M1,	Promoter Flanking Region,Enhancer,	4	8387	lnc-F13A1-3	lnc-F13A1-3:16	j	NONHSAG093929.1	NONHSAT208684.1	o	-	-	u
MN297233	LHRI_LNC2056.1	LHRI_LNC2056	14	32268413	32270033	-	14:32268413-32270033:-	AL136298.3	NA	M0,M1,M2,	NA	CTCF Binding Site,Promoter,	1	1621	lnc-GPR33-14	lnc-GPR33-14:1	k	NONHSAG069128.1	NONHSAT169187.1	o	-	-	u
MN296978	LHRI_LNC1731.1	LHRI_LNC1731	10	46004763	46005597	+	10:46004763-46005597:+	NCOA4	NA	M1,M0,M2,	NA	Open chromatin,	1	835	-	-	u	NONHSAG005887.2	NONHSAT156969.1	x	-	-	u
MN298663	LHRI_LNC1572.2	LHRI_LNC1572	9	135907962	135916386	+	9:135907962-135916386:+	AL355574.1	M0,M1,	M2,M1,	NA	Promoter,	2	1558	lnc-KCNT1-1	lnc-KCNT1-1:10	j	NONHSAG053779.2	NONHSAT135476.2	j	AL355574.1	ENST00000423793.1	o	yes
MN297119	LHRI_LNC1902.1	LHRI_LNC1902	12	3846067	3846268	+	12:3846067-3846268:+	PARP11	NA	M1,M0,M2,	NA	NA	1	202	-	-	u	NONHSAG010222.1	NONHSAT025919.1	i	-	-	u
MN296899	LHRI_LNC1118.1	LHRI_LNC1118	1	183591070	183592102	+	1:183591070-183592102:+	SMG7	M1,M0,	M0,	M0,M1,	Promoter,	1	1033	-	-	u	-	-	u	-	-	u		Yes
MN298014	LHRI_LNC838.1	LHRI_LNC838	3	101676439	101688530	+	3:101676439-101688530:+	ZBTB11-AS1	M0,M1,	M1,M0,M2,	M0,M1,	Promoter,	3	3651	lnc-CEP97-8	lnc-CEP97-8:1	o	NONHSAG035615.2	NONHSAT090907.2	o	ZBTB11-AS1	ENST00000609682.1	o	yes
MN298051	LHRI_LNC883.1	LHRI_LNC883	3	157160306	157160575	+	3:157160306-157160575:+	CCNL1	M1,M0,	M2,M0,M1,	M1,M2,M0,	CTCF Binding Site,Enhancer,Promoter,	1	270	lnc-LEKR1-4	lnc-LEKR1-4:13	c	-	-	u	-	-	u
MN298664	LHRI_LNC1573.1	LHRI_LNC1573	9	135910682	135911737	+	9:135910682-135911737:+	AL355574.1	M0,M1,	M2,M1,M0,	NA	Promoter,	1	1056	lnc-KCNT1-1	lnc-KCNT1-1:10	c	NONHSAG053779.2	NONHSAT135474.2	c	AL355574.1	ENST00000423793.1	i	yes
MN296945	LHRI_LNC1611.1	LHRI_LNC1611	1	244845898	244846224	-	1:244845898-244846224:-	HNRNPU	NA	M0,M1,M2,	NA	NA	1	327	lnc-HNRNPU-1	lnc-HNRNPU-1:8	i	NONHSAG004867.2	NONHSAT150880.1	x	-	-	u
MN297985	LHRI_LNC804.1	LHRI_LNC804	3	45215826	45216827	+	3:45215826-45216827:+	NA	NA	M1,M0,M2,	NA	NA	1	1002	-	-	u	NONHSAG084613.1	NONHSAT193832.1	c	-	-	u
MN298450	LHRI_LNC1343.1	LHRI_LNC1343	7	135382667	135384145	-	7:135382667-135384145:-	CNOT4	NA	M2,M1,M0,	NA	TF binding site,	1	1479	lnc-WDR91-3	lnc-WDR91-3:1	p	NONHSAG048876.2	NONHSAT123513.2	p	-	-	u
MK280401	LHRI_LNC777.2	LHRI_LNC777	3	15341577	15364647	+	3:15341577-15364647:+	NA	NA	NA	NA	Open chromatin,Enhancer,	3	3044	lnc-EAF1-3	lnc-EAF1-3:1	j	NONHSAG034522.2	NONHSAT088459.2	j	-	-	u
MN297667	LHRI_LNC477.170	LHRI_LNC477	2	70093897	70095166	-	2:70093897-70095166:-	PCBP1-AS1	NA	M0,M2,	M2,M1,M0,	NA	1	1270	PCBP1-AS1	PCBP1-AS1:209	c	NONHSAG028093.2	NONHSAT184936.1	e	PCBP1-AS1	ENST00000424748.1	e	yes
MN298577	LHRI_LNC1491.1	LHRI_LNC1491	9	35970956	35971156	-	9:35970956-35971156:-	YBX1P10	NA	M0,M2,	NA	TF binding site,	1	201	lnc-RECK-328	lnc-RECK-328:3	i	NONHSAG052138.1	NONHSAT131002.1	p	-	-	u
MN297507	LHRI_LNC265.1	LHRI_LNC265	17	76483553	76593127	-	17:76483553-76593127:-	PRCD	NA	NA	NA	NA	2	518	lnc-PRCD-5	lnc-PRCD-5:1	x	NONHSAG022893.1	NONHSAT056232.1	x	SNHG16	ENST00000448136.5	x	yes
MK280450	LHRI_LNC984.1	LHRI_LNC984	4	128257503	128257749	+	4:128257503-128257749:+	NA	NA	M2,M1,	NA	Open chromatin,	1	247	-	-	u	NONHSAG038838.1	NONHSAT098232.1	i	-	-	u
MN296758	LHRI_LNC1594.1	LHRI_LNC1594	KI270728.1	1543816	1544113	-	KI270728.1:1543816-1544113:-	NA	NA	NA	NA	NA	1	298	-	-	u	-	-	u	-	-	u		Yes
MK280272	LHRI_LNC401.1	LHRI_LNC401	19	54266926	54267198	+	19:54266926-54267198:+	NA	NA	M1,	NA	CTCF Binding Site,Open chromatin,	1	273	-	-	u	NONHSAG026471.1	NONHSAT067826.1	c	-	-	u
MK280217	LHRI_LNC179.21	LHRI_LNC179	17	16439063	16441502	+	17:16439063-16441502:+	LRRC75A-AS1,SNORD49A	M1,M0,	M0,M1,M2,	M1,M0,	Promoter,	5	532	LRRC75A-AS1	LRRC75A-AS1:26	j	NONHSAG020957.2	NONHSAT145937.2	j	LRRC75A-AS1	ENST00000581361.5	j	yes
MN298303	LHRI_LNC1181.1	LHRI_LNC1181	6	43616157	43618065	+	6:43616157-43618065:+	GTPBP2	NA	M1,M0,M2,	NA	NA	1	1909	-	-	u	-	-	u	-	-	u		Yes
MK280545	LHRI_LNC1280.1	LHRI_LNC1280	7	55764797	55779042	+	7:55764797-55779042:+	PSPHP1	NA	M2,M0,M1,	NA	NA	3	943	lnc-ZNF713-3	lnc-ZNF713-3:5	k	NONHSAG047634.2	NONHSAT120701.2	k	-	-	u
MN297205	LHRI_LNC2019.1	LHRI_LNC2019	13	43971373	43971590	+	13:43971373-43971590:+	AL512506.3	NA	M2,M1,M0,	NA	CTCF Binding Site,	1	218	LINC00284	LINC00284:18	i	NONHSAG013371.2	NONHSAT033470.2	i	LINC00284	ENST00000439707.6	i	yes
MN298500	LHRI_LNC1401.1	LHRI_LNC1401	8	58583465	58584623	+	8:58583465-58584623:+	NSMAF	NA	M2,M1,M0,	NA	NA	1	1159	lnc-CYP7A1-6	lnc-CYP7A1-6:7	x	NONHSAG050299.1	NONHSAT126761.1	i	-	-	u
MN298059	LHRI_LNC895.1	LHRI_LNC895	3	172603132	172603382	-	3:172603132-172603382:-	SLC31A1P1	NA	M1,M0,M2,	NA	TF binding site,Open chromatin,	1	251	lnc-NCEH1-2	lnc-NCEH1-2:1	p	NONHSAG036679.2	NONHSAT093255.2	p	-	-	u
MN297145	LHRI_LNC1939.1	LHRI_LNC1939	12	39160166	39160412	-	12:39160166-39160412:-	NA	NA	M1,	NA	Open chromatin,	1	247	-	-	u	NONHSAG010891.1	NONHSAT027690.1	i	-	-	u
MN297890	LHRI_LNC698.1	LHRI_LNC698	21	36051712	36051921	+	21:36051712-36051921:+	SETD4	NA	M0,M1,M2,	NA	NA	1	210	lnc-RUNX1-5	lnc-RUNX1-5:1	i	-	-	u	-	-	u
MN297032	LHRI_LNC1809.1	LHRI_LNC1809	11	10508917	10509776	+	11:10508917-10509776:+	MTRNR2L8	NA	M1,M0,M2,	NA	Enhancer,	1	860	lnc-AMPD3-3	lnc-AMPD3-3:1	i	NONHSAG062652.1	NONHSAT158824.1	i	-	-	u
MK280329	LHRI_LNC590.1	LHRI_LNC590	2	216395032	216401617	+	2:216395032-216401617:+	AC098820.2	NA	M2,	NA	Promoter Flanking Region,	3	3967	lnc-SMARCAL1-1	lnc-SMARCAL1-1:2	j	NONHSAG030474.2	NONHSAT076801.2	j	AC098820.2	ENST00000457694.1	x	yes
MN297047	LHRI_LNC1827.1	LHRI_LNC1827	11	61796685	61797217	-	11:61796685-61797217:-	FADS2	NA	M0,M1,M2,	NA	Enhancer,	1	533	-	-	u	NONHSAG063457.1	NONHSAT160373.1	e	-	-	u
MK280215	LHRI_LNC172.1	LHRI_LNC172	17	8023894	8024297	-	17:8023894-8024297:-	NA	NA	M2,M0,	NA	Promoter Flanking Region,	1	404	lnc-ALOX12B-4	lnc-ALOX12B-4:1	c	-	-	u	-	-	u
MN297412	LHRI_LNC173.1	LHRI_LNC173	17	8187595	8188049	+	17:8187595-8188049:+	MIR4521	M0,M1,	M2,	M0,M1,	Promoter,	1	455	LINC00324	LINC00324:3	i	-	-	u	-	-	u
MK280664	LHRI_LNC1653.1	LHRI_LNC1653	X	80570712	80571170	-	X:80570712-80571170:-	HK2P1	NA	M2,M0,M1,	NA	NA	1	459	-	-	u	-	-	u	-	-	u		Yes
MN297228	LHRI_LNC2046.1	LHRI_LNC2046	14	20785748	20787592	+	14:20785748-20787592:+	AL133371.2	NA	M2,M1,M0,	NA	NA	1	1845	lnc-RNASE1-2	lnc-RNASE1-2:2	i	NONHSAG014360.1	NONHSAT035560.1	x	AL133371.2	ENST00000556624.1	p	yes
MN297053	LHRI_LNC1834.1	LHRI_LNC1834	11	62684283	62750521	-	11:62684283-62750521:-	TTC9C	NA	M1,M0,M2,	NA	NA	2	1833	lnc-TTC9C-1	lnc-TTC9C-1:1	x	NONHSAG008556.1	NONHSAT021865.1	x	-	-	u
MN297215	LHRI_LNC2030.1	LHRI_LNC2030	13	75482442	75482659	-	13:75482442-75482659:-	NA	M1,M0,	NA	M0,	Promoter,	1	218	-	-	u	-	-	u	-	-	u		Yes
MN298021	LHRI_LNC846.1	LHRI_LNC846	3	113002119	113004970	+	3:113002119-113004970:+	NEPRO	NA	M0,M1,M2,	NA	NA	1	2852	lnc-CD200R1-1	lnc-CD200R1-1:5	x	NONHSAG084876.1	NONHSAT194321.1	p	-	-	u
MN298159	LHRI_LNC1020.1	LHRI_LNC1020	5	6773208	6779998	+	5:6773208-6779998:+	AC122710.3,NA	NA	NA	NA	Promoter Flanking Region,Open chromatin,	5	2500	lnc-PAPD7-2	lnc-PAPD7-2:9	c	NONHSAG089987.1	NONHSAT202198.1	k	AC122710.3	ENST00000606566.1	k	yes
MK280241	LHRI_LNC237.1	LHRI_LNC237	17	50151054	50151850	-	17:50151054-50151850:-	NA	M0,M1,	M2,	M0,M1,	Promoter,	1	797	lnc-SGCA-4	lnc-SGCA-4:1	x	NONHSAG022161.2	NONHSAT054593.2	x	-	-	u
MN296881	LHRI_LNC747.1	LHRI_LNC747	1	154558488	154558689	+	1:154558488-154558689:+	UBE2Q1	M0,M1,	M2,M0,M1,	M1,M0,	Promoter,	1	202	-	-	u	-	-	u	-	-	u		Yes
MN297104	LHRI_LNC1881.7	LHRI_LNC1881	11	110375585	110407598	+	11:110375585-110407598:+	AP000924.1	NA	NA	M0,M1,	Promoter Flanking Region,	3	1584	lnc-FDX1-1	lnc-FDX1-1:1	j	NONHSAG009576.2	NONHSAT024073.2	j	AP000924.1	ENST00000526605.5	j	Yes?
MK280251	LHRI_LNC270.1	LHRI_LNC270	17	78925579	78925963	-	17:78925579-78925963:-	NA	M0,M1,	M1,	M1,M0,	Promoter,	1	385	-	-	u	-	-	u	-	-	u		Yes
MK280623	LHRI_LNC1512.1	LHRI_LNC1512	9	63813025	63820191	+	9:63813025-63820191:+	MIR4477B	NA	M0,M1,M2,	NA	CTCF Binding Site,Promoter,Promoter Flanking Region,	2	2706	lnc-ANKRD20A4-5	lnc-ANKRD20A4-5:5	k	NONHSAG052449.2	NONHSAT131618.2	o	CR786580.1	ENST00000417843.2	x	yes
MK280559	LHRI_LNC1321.1	LHRI_LNC1321	7	102493888	102496365	+	7:102493888-102496365:+	RASA4B	NA	M0,M1,M2,	NA	Promoter Flanking Region,Promoter,	2	2284	lnc-UPK3BL2-1	lnc-UPK3BL2-1:6	x	-	-	u	-	-	u
MN296814	LHRI_LNC109.9	LHRI_LNC109	1	58882885	59029995	-	1:58882885-59029995:-	AC105277.1	NA	NA	NA	Enhancer,	6	1532	lnc-JUN-2	lnc-JUN-2:12	j	NONHSAG001627.2	NONHSAT003536.2	j	AC105277.1	ENST00000635492.1	j	yes
MN298109	LHRI_LNC952.1	LHRI_LNC952	4	41910865	41934679	-	4:41910865-41934679:-	AC108210.2	M0,M1,	M1,M0,M2,	M1,M0,	Promoter,	3	838	lnc-TMEM33-1	lnc-TMEM33-1:1	x	NONHSAG088283.1	NONHSAT199910.1	o	-	-	u
MN297632	LHRI_LNC426.1	LHRI_LNC426	2	27078625	27079102	-	2:27078625-27079102:-	EMILIN1	NA	M1,M0,	NA	Enhancer,Promoter,	1	478	-	-	u	-	-	u	-	-	u		Yes
MN296842	LHRI_LNC343.8	LHRI_LNC343	1	110508181	110570766	+	1:110508181-110570766:+	KCNA2,KCNA3	NA	M0,M2,	M1,M0,	Promoter Flanking Region,	3	1165	lnc-PROK1-4	lnc-PROK1-4:3	j	NONHSAG058027.1	NONHSAT152080.1	x	-	-	u
MN297999	LHRI_LNC821.1	LHRI_LNC821	3	52277770	52277975	+	3:52277770-52277975:+	WDR82	M0,M1,	M1,M0,M2,	M1,M0,	Promoter,	1	206	-	-	u	NONHSAG035159.1	NONHSAT089901.1	p	-	-	u
MN297570	LHRI_LNC334.1	LHRI_LNC334	19	16635438	16638454	-	19:16635438-16638454:-	AC024075.3	NA	M1,M0,M2,	NA	Open chromatin,	1	3017	lnc-OR7C2-1	lnc-OR7C2-1:1	x	NONHSAG024979.2	NONHSAT179488.1	x	AC008764.2	ENST00000597226.1	x	yes
MN298654	LHRI_LNC1564.1	LHRI_LNC1564	9	127785136	127785457	+	9:127785136-127785457:+	NA	M1,M0,	M2,M1,M0,	M1,M0,	Promoter,	1	322	lnc-CDK9-1	lnc-CDK9-1:2	o	NONHSAG053495.2	NONHSAT134841.2	o	-	-	u
MN297543	LHRI_LNC300.5	LHRI_LNC300	18	76807930	76822298	-	18:76807930-76822298:-	AC027575.2,ZNF236-DT	M1,M0,	M1,M0,M2,	M0,M1,M2,	Promoter,Promoter Flanking Region,	2	1858	ZNF236-DT	ZNF236-DT:14	j	NONHSAG024210.2	NONHSAT178682.1	j	ZNF236-DT	ENST00000585258.1	j	yes
MK279978	LHRI_LNC733.1	LHRI_LNC733	1	153981651	153982131	+	1:153981651-153982131:+	RAB13	NA	M2,M1,M0,	NA	NA	1	481	lnc-CREB3L4-4	lnc-CREB3L4-4:2	p	NONHSAG002997.2	NONHSAT006569.2	p	-	-	u
MN297915	LHRI_LNC731.1	LHRI_LNC731	22	31277645	31281088	-	22:31277645-31281088:-	LIMK2	NA	M2,M0,M1,	NA	NA	1	3444	-	-	u	NONHSAG033686.1	NONHSAT084812.1	p	-	-	u
MN297296	LHRI_LNC2120.1	LHRI_LNC2120	15	50481676	50481956	-	15:50481676-50481956:-	USP8	NA	M0,M1,M2,	NA	NA	1	281	lnc-TRPM7-1	lnc-TRPM7-1:1	i	NONHSAG070736.1	NONHSAT171581.1	i	-	-	u
MK280625	LHRI_LNC1519.3	LHRI_LNC1519	9	68969419	68975859	-	9:68969419-68975859:-	PIP5K1B	NA	NA	NA	Open chromatin,Promoter Flanking Region,	2	3251	lnc-PRKACG-1	lnc-PRKACG-1:1	j	NONHSAG052505.2	NONHSAT131758.2	j	-	-	u
MN298393	LHRI_LNC1271.10	LHRI_LNC1271	7	38349955	38373822	+	7:38349955-38373822:+	TRG-AS1	NA	M0,M1,	NA	Promoter Flanking Region,CTCF Binding Site,	3	786	TRG-AS1	TRG-AS1:7	j	NONHSAG047376.2	NONHSAT120179.2	j	TRG-AS1	ENST00000629357.1	j	yes
MN297518	LHRI_LNC278.2	LHRI_LNC278	18	1559875	1647163	+	18:1559875-1647163:+	AC008109.1	NA	NA	NA	NA	4	1054	lnc-ADCYAP1-3	lnc-ADCYAP1-3:1	j	NONHSAG023190.2	NONHSAT056906.2	j	AC008109.1	ENST00000583163.1	j	Yes?
MN297186	LHRI_LNC1988.1	LHRI_LNC1988	12	104456947	104457237	-	12:104456947-104457237:-	CHST11	M0,M1,	M2,	M0,	Promoter,Promoter Flanking Region,	1	291	lnc-CHST11-1	lnc-CHST11-1:1	x	NONHSAG012146.2	NONHSAT030427.2	p	-	-	u
MN298702	LHRI_LNC1652.1	LHRI_LNC1652	X	77278910	77279115	+	X:77278910-77279115:+	NA	NA	M2,	NA	CTCF Binding Site,	1	206	-	-	u	-	-	u	-	-	u		Yes
MN298347	LHRI_LNC1220.5	LHRI_LNC1220	6	140846050	140898477	-	6:140846050-140898477:-	AL035446.1	NA	M2,	NA	Promoter Flanking Region,	4	561	lnc-NMBR-2	lnc-NMBR-2:2	j	NONHSAG045005.2	NONHSAT115288.2	j	AL035446.2	ENST00000650553.1	j	yes
MN297139	LHRI_LNC1926.1	LHRI_LNC1926	12	14620750	14624736	+	12:14620750-14624736:+	GUCY2C	NA	M0,	NA	Open chromatin,CTCF Binding Site,	1	3987	-	-	u	NONHSAG010564.1	NONHSAT027067.1	i	PLBD1-AS1	ENST00000542401.1	p	Yes?
MN298549	LHRI_LNC1462.1	LHRI_LNC1462	8	143923420	143923658	+	8:143923420-143923658:+	PLEC	NA	M2,M0,M1,	NA	Promoter Flanking Region,	1	239	-	-	u	NONHSAG051523.2	NONHSAT129674.2	c	-	-	u
MK280317	LHRI_LNC545.1	LHRI_LNC545	2	152717640	152717875	+	2:152717640-152717875:+	PRPF40A	M1,M0,	M1,M0,M2,	M1,M0,	Promoter,	1	236	lnc-PRPF40A-5	lnc-PRPF40A-5:2	x	-	-	u	-	-	u
MK280566	LHRI_LNC1362.1	LHRI_LNC1362	7	149838787	149840142	+	7:149838787-149840142:+	ZNF862	M1,M0,	NA	NA	Promoter,	1	1356	-	-	u	NONHSAG049120.1	NONHSAT124093.1	i	-	-	u
MK280314	LHRI_LNC533.1	LHRI_LNC533	2	131419980	131420238	-	2:131419980-131420238:-	NA	NA	M2,	NA	Open chromatin,	1	259	lnc-MZT2A-19	lnc-MZT2A-19:1	c	-	-	u	-	-	u
MN297949	LHRI_LNC772.9	LHRI_LNC772	3	11202548	11225918	-	3:11202548-11225918:-	HRH1	M0,M1,	M1,M0,M2,	M1,M0,	Promoter,Enhancer,Open chromatin,	3	4681	lnc-VGLL4-9	lnc-VGLL4-9:3	j	NONHSAG085340.1	NONHSAT195410.1	j	AC083855.2	ENST00000648436.1	j	yes
MK280646	LHRI_LNC1620.1	LHRI_LNC1620	X	15647063	15647423	+	X:15647063-15647423:+	CLTRN	NA	M2,	NA	CTCF Binding Site,	1	361	-	-	u	-	-	u	-	-	u		Yes
MN297015	LHRI_LNC1788.1	LHRI_LNC1788	10	124063290	124086646	-	10:124063290-124086646:-	CHST15	NA	M1,M0,	NA	Promoter Flanking Region,	2	12761	lnc-CPXM2-4	lnc-CPXM2-4:1	i	-	-	u	-	-	u
MN298730	LHRI_LNC1688.5	LHRI_LNC1688	Y	3002998	3125970	+	Y:3002998-3125970:+	LINC00278	NA	NA	NA	NA	7	6179	LINC00278	LINC00278:3	j	NONHSAG055665.2	NONHSAT139305.2	j	LINC00278	ENST00000425031.1	j	yes
MN297393	LHRI_LNC149.1	LHRI_LNC149	16	74361386	74363887	-	16:74361386-74363887:-	AC009053.1	NA	M1,M0,M2,	NA	Open chromatin,	1	2502	lnc-CLEC18B-2	lnc-CLEC18B-2:6	i	NONHSAG071823.1	NONHSAT173269.1	x	-	-	u
MN297558	LHRI_LNC322.1	LHRI_LNC322	19	11567910	11568548	-	19:11567910-11568548:-	ZNF627	NA	M1,M2,	M0,	Promoter Flanking Region,	1	639	lnc-ACP5-2	lnc-ACP5-2:1	k	NONHSAG024851.2	NONHSAT061176.2	i	-	-	u
MN296867	LHRI_LNC636.1	LHRI_LNC636	1	149056643	149057316	-	1:149056643-149057316:-	NBPF9	NA	M1,M0,M2,	NA	NA	1	674	-	-	u	-	-	u	-	-	u		Yes
MN297832	LHRI_LNC663.1	LHRI_LNC663	20	50190831	50191260	-	20:50190831-50191260:-	CEBPB	M0,M1,	M1,M0,M2,	M0,M2,M1,	Promoter,	1	430	CEBPB-AS1	CEBPB-AS1:1	i	NONHSAG082017.1	NONHSAT189782.1	i	CEBPB-AS1	ENST00000613921.1	i	yes
MN297600	LHRI_LNC381.1	LHRI_LNC381	19	48926954	48927353	-	19:48926954-48927353:-	NA	NA	M1,M0,M2,	NA	Promoter Flanking Region,Enhancer,	1	400	-	-	u	NONHSAG026200.2	NONHSAT180511.1	i	-	-	u
MN297956	LHRI_LNC775.1	LHRI_LNC775	3	12317702	12328752	-	3:12317702-12328752:-	AC091492.1	NA	M2,M1,M0,	NA	Open chromatin,Promoter Flanking Region,	4	2003	lnc-SYN2-1	lnc-SYN2-1:1	x	NONHSAG034458.2	NONHSAT088007.2	x	-	-	u
MN298037	LHRI_LNC864.1	LHRI_LNC864	3	136330805	136331429	+	3:136330805-136331429:+	PCCB	NA	M1,M0,M2,	NA	Open chromatin,	1	625	-	-	u	NONHSAG084979.1	NONHSAT194508.1	p	-	-	u
MK280074	LHRI_LNC1879.1	LHRI_LNC1879	11	106825287	106826018	+	11:106825287-106826018:+	GUCY1A2	NA	M0,M1,M2,	NA	NA	2	423	-	-	u	-	-	u	-	-	u		Yes
MN297482	LHRI_LNC226.1	LHRI_LNC226	17	45505054	45506515	-	17:45505054-45506515:-	LRRC37A4P	NA	M0,M1,M2,	NA	NA	1	1462	lnc-PLEKHM1-3	lnc-PLEKHM1-3:4	o	NONHSAG021990.2	NONHSAT054126.2	o	-	-	u
MN298727	LHRI_LNC1688.9	LHRI_LNC1688	Y	3002998	3105696	+	Y:3002998-3105696:+	LINC00278	NA	NA	NA	NA	6	2241	LINC00278	LINC00278:3	j	NONHSAG055665.2	NONHSAT139305.2	j	LINC00278	ENST00000425031.1	j	yes
MK280034	LHRI_LNC1807.3	LHRI_LNC1807	11	9758294	9811469	+	11:9758294-9811469:+	SBF2-AS1	M1,M0,	NA	M0,M1,M2,	Promoter,	3	4032	lnc-SBF2-2	lnc-SBF2-2:1	x	NONHSAG007631.2	NONHSAT017941.2	j	SBF2-AS1	ENST00000650092.1	j	yes
MN298049	LHRI_LNC881.1	LHRI_LNC881	3	156713104	156713859	-	3:156713104-156713859:-	METTL15P1	NA	M2,M0,M1,	NA	Open chromatin,	1	756	-	-	u	-	-	u	-	-	u		Yes
MN298556	LHRI_LNC1472.1	LHRI_LNC1472	9	5574093	5576000	+	9:5574093-5576000:+	NA	NA	M0,M1,M2,	NA	CTCF Binding Site,	1	1908	lnc-PLGRKT-5	lnc-PLGRKT-5:1	i	NONHSAG101847.1	NONHSAT220465.1	i	-	-	u
MK279988	LHRI_LNC1063.12	LHRI_LNC1063	1	178006136	178037924	-	1:178006136-178037924:-	CRYZL2P-SEC16B	M1,M0,	NA	NA	Promoter,CTCF Binding Site,	10	4371	lnc-SEC16B-2	lnc-SEC16B-2:16	j	NONHSAG003561.2	NONHSAT007800.2	j	CRYZL2P-SEC16B	ENST00000354921.7	j	yes
MN298077	LHRI_LNC918.1	LHRI_LNC918	4	377469	377697	+	4:377469-377697:+	ZNF141	NA	M2,M0,	NA	NA	1	229	-	-	u	NONHSAG037203.1	NONHSAT094536.1	p	-	-	u
MK280032	LHRI_LNC1802.1	LHRI_LNC1802	11	6710132	6711500	-	11:6710132-6711500:-	NA	NA	M2,M1,	NA	CTCF Binding Site,	1	1369	-	-	u	-	-	u	-	-	u		Yes
MN297712	LHRI_LNC524.1	LHRI_LNC524	2	113966075	113966682	+	2:113966075-113966682:+	NA	NA	M0,M1,M2,	NA	Enhancer,TF binding site,	1	608	lnc-ACTR3-2	lnc-ACTR3-2:1	p	NONHSAG029002.1	NONHSAT073752.1	c	-	-	u
MK280019	LHRI_LNC1750.3	LHRI_LNC1750	10	78943328	78978043	-	10:78943328-78978043:-	ZMIZ1-AS1	M1,	M1,M0,	M0,M1,	Promoter Flanking Region,	6	2106	ZMIZ1-AS1	ZMIZ1-AS1:30	j	NONHSAG006320.2	NONHSAT015089.2	j	ZMIZ1-AS1	ENST00000456353.5	j	yes
MK280391	LHRI_LNC751.1	LHRI_LNC751	22	44178058	44181223	-	22:44178058-44181223:-	PARVG	M1,	M0,M1,M2,	M0,M1,	Promoter,	2	2346	-	-	u	NONHSAG034089.1	NONHSAT087118.1	o	-	-	u
MN296833	LHRI_LNC314.1	LHRI_LNC314	1	108053452	108053971	+	1:108053452-108053971:+	AL390036.1	NA	NA	NA	Promoter Flanking Region,	1	520	VAV3-AS1	VAV3-AS1:13	i	NONHSAG002301.2	NONHSAT004972.2	p	AL390036.1	ENST00000634635.1	i	yes
MN297226	LHRI_LNC2044.1	LHRI_LNC2044	14	20633015	20633430	+	14:20633015-20633430:+	NA	NA	NA	NA	Promoter Flanking Region,	1	416	lnc-RNASE4-1	lnc-RNASE4-1:1	o	-	-	u	-	-	u
MN298694	LHRI_LNC1635.1	LHRI_LNC1635	X	46759263	46780647	-	X:46759263-46780647:-	NA	NA	M2,	NA	Promoter Flanking Region,	4	953	-	-	u	-	-	u	-	-	u		Yes
MN298708	LHRI_LNC1661.1	LHRI_LNC1661	X	100394984	100395186	-	X:100394984-100395186:-	PCDH19	NA	NA	NA	Open chromatin,	1	203	-	-	u	-	-	u	-	-	u		Yes
MN298104	LHRI_LNC949.1	LHRI_LNC949	4	37871977	37872248	+	4:37871977-37872248:+	AC021106.1	NA	M2,M1,M0,	NA	Open chromatin,	1	272	lnc-PGM2-1	lnc-PGM2-1:1	p	NONHSAG037750.2	NONHSAT096018.2	p	-	-	u
MN297180	LHRI_LNC1982.2	LHRI_LNC1982	12	96052597	96053571	+	12:96052597-96053571:+	NA	NA	NA	M1,M0,	Promoter Flanking Region,	2	338	-	-	u	NONHSAG064956.1	NONHSAT162612.1	i	-	-	u
MN298480	LHRI_LNC1377.10	LHRI_LNC1377	8	12437199	12566878	+	8:12437199-12566878:+	AC145124.1,AC068587.4	M0,M1,	NA	NA	Promoter Flanking Region,Promoter,	6	1739	lnc-ZNF705D-2	lnc-ZNF705D-2:39	j	NONHSAG049565.2	NONHSAT215437.1	j	AC068587.4	ENST00000641839.1	x	yes
MN297213	LHRI_LNC2029.1	LHRI_LNC2029	13	56064898	56065132	+	13:56064898-56065132:+	NA	NA	M2,M0,	NA	NA	1	235	-	-	u	-	-	u	-	-	u		Yes
MN298409	LHRI_LNC1290.1	LHRI_LNC1290	7	66746648	66757737	+	7:66746648-66757737:+	AC027644.2	NA	M1,M0,M2,	NA	Enhancer,Open chromatin,	2	4509	lnc-SBDS-14	lnc-SBDS-14:1	x	NONHSAG047869.1	NONHSAT121269.1	o	-	-	u
MK280286	LHRI_LNC479.1	LHRI_LNC479	2	80161961	80162218	-	2:80161961-80162218:-	CTNNA2	NA	M2,M1,M0,	NA	NA	1	258	lnc-LRRTM1-7	lnc-LRRTM1-7:1	p	NONHSAG028310.2	NONHSAT071889.2	p	-	-	u
MN296943	LHRI_LNC1542.1	LHRI_LNC1542	1	235909041	235945216	+	1:235909041-235945216:+	AL139161.2	NA	NA	NA	Promoter Flanking Region,	2	1583	lnc-NID1-2	lnc-NID1-2:1	x	NONHSAG057340.1	NONHSAT150807.1	o	AL139161.2	ENST00000438371.1	x	yes
MN298493	LHRI_LNC1394.1	LHRI_LNC1394	8	51949055	51950075	+	8:51949055-51950075:+	AC064807.1	NA	M2,M0,	NA	NA	1	1021	lnc-NPBWR1-12	lnc-NPBWR1-12:6	c	NONHSAG050210.2	NONHSAT126544.2	c	AC064807.1	ENST00000423716.1	p	yes
MN297358	LHRI_LNC99.1	LHRI_LNC99	16	22494611	22502532	+	16:22494611-22502532:+	NPIPB5	NA	M2,M0,M1,	NA	TF binding site,Open chromatin,	1	7922	-	-	u	NONHSAG018873.1	NONHSAT141075.1	e	-	-	u
MN297046	LHRI_LNC1826.1	LHRI_LNC1826	11	61376144	61377658	+	11:61376144-61377658:+	NA	NA	M2,M1,M0,	NA	Promoter Flanking Region,Open chromatin,	1	1515	lnc-TMEM138-3	lnc-TMEM138-3:1	o	NONHSAG008471.2	NONHSAT021664.2	o	-	-	u
MN298328	LHRI_LNC1211.1	LHRI_LNC1211	6	134370786	134373560	-	6:134370786-134373560:-	NA	NA	M2,	M0,M1,	Promoter Flanking Region,	1	2775	lnc-SGK1-9	lnc-SGK1-9:1	k	-	-	u	-	-	u
MN297149	LHRI_LNC1945.1	LHRI_LNC1945	12	48929223	48931994	-	12:48929223-48931994:-	CCDC65	NA	M2,M1,M0,	NA	NA	1	2772	-	-	u	-	-	u	-	-	u		Yes
MN298451	LHRI_LNC1344.2	LHRI_LNC1344	7	135980911	136058482	+	7:135980911-136058482:+	AC024084.1,AC078845.1	NA	NA	NA	Promoter Flanking Region,	6	642	lnc-STMP1-5	lnc-STMP1-5:3	j	NONHSAG048890.2	NONHSAT123539.2	j	AC024084.1	ENST00000440744.2	j	yes
MK279926	LHRI_LNC1592.12	LHRI_LNC1592	KI270711.1	36987	42177	-	KI270711.1:36987-42177:-	NA	NA	NA	NA	NA	2	3563	-	-	u	-	-	u	-	-	u		Yes
MN298428	LHRI_LNC1322.2	LHRI_LNC1322	7	102592953	102595436	+	7:102592953-102595436:+	RASA4	NA	M1,M0,M2,	NA	Promoter Flanking Region,Promoter,	2	2290	lnc-POLR2J3-1	lnc-POLR2J3-1:1	x	-	-	u	AC105052.4	ENST00000639209.1	i	yes
MN297059	LHRI_LNC1840.1	LHRI_LNC1840	11	65419429	65419939	-	11:65419429-65419939:-	NA	NA	NA	M0,M1,M2,	Promoter,	1	511	lnc-LTBP3-2	lnc-LTBP3-2:14	c	NONHSAG063480.1	NONHSAT160425.1	e	-	-	u
MK280354	LHRI_LNC677.2	LHRI_LNC677	21	5101748	5105479	+	21:5101748-5105479:+	GATD3B	NA	NA	M0,	Promoter Flanking Region,	2	3262	-	-	u	-	-	u	-	-	u		Yes
MK280542	LHRI_LNC1278.1	LHRI_LNC1278	7	47954849	47959709	-	7:47954849-47959709:-	AC069282.1	NA	M2,M0,M1,	NA	NA	1	4861	lnc-PKD1L1-1	lnc-PKD1L1-1:1	k	NONHSAG047547.2	NONHSAT120522.2	k	-	-	u
MK280536	LHRI_LNC1271.3	LHRI_LNC1271	7	38341615	38378761	+	7:38341615-38378761:+	TRG-AS1	NA	M0,M1,	NA	CTCF Binding Site,Promoter Flanking Region,	4	3495	TRG-AS1	TRG-AS1:7	j	NONHSAG047376.2	NONHSAT120179.2	j	TRG-AS1	ENST00000629357.1	j	yes
MN297442	LHRI_LNC204.1	LHRI_LNC204	17	35313502	35325423	+	17:35313502-35325423:+	AC022706.1	NA	NA	NA	CTCF Binding Site,Open chromatin,Promoter,	4	1302	lnc-SLFN5-1	lnc-SLFN5-1:6	j	NONHSAG021539.2	NONHSAT053080.2	j	AC022706.1	ENST00000585387.1	j	Yes?
MK280288	LHRI_LNC486.1	LHRI_LNC486	2	85883302	85914762	+	2:85883302-85914762:+	ST3GAL5-AS1,AC012511.1	NA	M2,M1,M0,	NA	CTCF Binding Site,	3	2975	ST3GAL5-AS1	ST3GAL5-AS1:22	j	NONHSAG028405.2	NONHSAT072065.2	j	ST3GAL5-AS1	ENST00000455121.3	j	yes
MN298461	LHRI_LNC1358.1	LHRI_LNC1358	7	149142621	149147289	-	7:149142621-149147289:-	ZNF398	M1,M0,	NA	M1,	Promoter,Promoter Flanking Region,	2	3919	-	-	u	NONHSAG096761.1	NONHSAT212853.1	i	-	-	u
MN296992	LHRI_LNC1757.1	LHRI_LNC1757	10	87239685	87243121	-	10:87239685-87243121:-	NUTM2A-AS1	NA	M2,M1,M0,	NA	NA	1	3437	NUTM2A-AS1	NUTM2A-AS1:29	c	NONHSAG006407.1	NONHSAT015345.1	x	NUTM2A-AS1	ENST00000433920.5	i	yes
MN297254	LHRI_LNC2067.1	LHRI_LNC2067	14	55085685	55098454	-	14:55085685-55098454:-	NA	NA	NA	M1,M0,	Open chromatin,Promoter Flanking Region,Enhancer,	3	1500	lnc-DLGAP5-3	lnc-DLGAP5-3:6	j	NONHSAG015029.2	NONHSAT036986.2	k	-	-	u
MN298235	LHRI_LNC1117.1	LHRI_LNC1117	5	173888362	173888581	-	5:173888362-173888581:-	CPEB4	M1,M0,	M1,M0,M2,	M1,M0,	Promoter,Promoter Flanking Region,	1	220	-	-	u	NONHSAG042288.1	NONHSAT105237.1	i	-	-	u
MN298113	LHRI_LNC957.1	LHRI_LNC957	4	56466880	56467586	-	4:56466880-56467586:-	SRP72	M0,M1,	M2,M1,M0,	NA	Promoter,	1	707	lnc-PPAT-1	lnc-PPAT-1:1	c	NONHSAG038001.2	NONHSAT096505.2	c	-	-	u
MN297440	LHRI_LNC202.1	LHRI_LNC202	17	32389967	32390269	+	17:32389967-32390269:+	NA	NA	M1,M0,M2,	NA	NA	1	303	-	-	u	-	-	u	-	-	u		Yes
MN297575	LHRI_LNC346.1	LHRI_LNC346	19	20642324	20642996	-	19:20642324-20642996:-	ZNF626	NA	M2,M1,M0,	NA	NA	1	673	lnc-ZNF626-1	lnc-ZNF626-1:1	i	NONHSAG025234.1	NONHSAT063661.1	i	AC010636.2	ENST00000595094.1	i	yes
MK280437	LHRI_LNC923.1	LHRI_LNC923	4	687188	691242	+	4:687188-691242:+	SLC49A3	M1,M0,	M2,M1,M0,	M0,M1,	Promoter,	2	3822	lnc-ATP5ME-4	lnc-ATP5ME-4:1	x	-	-	u	-	-	u
MN298566	LHRI_LNC1481.1	LHRI_LNC1481	9	14645783	14646067	-	9:14645783-14646067:-	ZDHHC21	NA	M2,M0,M1,	NA	NA	1	285	-	-	u	-	-	u	-	-	u		Yes
MK280282	LHRI_LNC466.1	LHRI_LNC466	2	65047746	65056215	-	2:65047746-65056215:-	LINC02576	M0,M1,	M2,	NA	Promoter,Promoter Flanking Region,Enhancer,	3	859	lnc-RAB1A-1	lnc-RAB1A-1:1	j	NONHSAG027985.2	NONHSAT071153.2	j	LINC02576	ENST00000622718.1	x	yes
MN298372	LHRI_LNC1248.1	LHRI_LNC1248	7	262916	263273	-	7:262916-263273:-	NA	NA	M2,M1,M0,	NA	CTCF Binding Site,TF binding site,	1	358	lnc-FAM20C-8	lnc-FAM20C-8:1	x	NONHSAG046726.2	NONHSAT118622.2	x	-	-	u
MN297592	LHRI_LNC372.1	LHRI_LNC372	19	42228240	42231877	+	19:42228240-42231877:+	GSK3A	NA	M2,M1,M0,	NA	Open chromatin,	1	3638	lnc-DEDD2-2	lnc-DEDD2-2:1	x	-	-	u	-	-	u
MK280250	LHRI_LNC266.5	LHRI_LNC266	17	76557769	76565343	+	17:76557769-76565343:+	SNHG16	M0,M1,	M2,M1,M0,	M0,M1,	Promoter,	4	2400	SNHG16	SNHG16:11	c	NONHSAG022825.2	NONHSAT056046.2	c	SNHG16	ENST00000590435.5	j	yes
MK280132	LHRI_LNC2031.1	LHRI_LNC2031	13	76592361	76592688	-	13:76592361-76592688:-	NA	NA	M2,	NA	NA	1	328	-	-	u	-	-	u	AL136441.1	ENST00000648060.1	i	yes
MN297924	LHRI_LNC746.1	LHRI_LNC746	22	42056466	42057847	-	22:42056466-42057847:-	WBP2NL	NA	M2,M0,M1,	NA	CTCF Binding Site,	1	1382	-	-	u	-	-	u	-	-	u		Yes
MN297284	LHRI_LNC2107.1	LHRI_LNC2107	15	32467471	32473121	-	15:32467471-32473121:-	NA	NA	M2,	NA	NA	2	1947	-	-	u	-	-	u	-	-	u		Yes
MN298344	LHRI_LNC1221.1	LHRI_LNC1221	6	139689959	139697466	-	6:139689959-139697466:-	FILNC1	NA	M2,	NA	CTCF Binding Site,Promoter Flanking Region,	2	2501	FILNC1	FILNC1:2	i	-	-	u	FILNC1	ENST00000647189.1	i	yes
MN297563	LHRI_LNC326.1	LHRI_LNC326	19	12143968	12144205	-	19:12143968-12144205:-	ZNF625-ZNF20	NA	M0,M1,M2,	NA	NA	1	238	lnc-ZNF625-ZNF20-1	lnc-ZNF625-ZNF20-1:2	i	NONHSAG024864.1	NONHSAT061210.1	i	-	-	u
MN298358	LHRI_LNC1237.1	LHRI_LNC1237	6	163414673	163414874	-	6:163414673-163414874:-	QKI	M0,M1,	NA	M2,M1,M0,	Promoter,	1	202	lnc-PRKN-23	lnc-PRKN-23:2	i	NONHSAG093796.1	NONHSAT208399.1	x	-	-	u
MN297370	LHRI_LNC115.1	LHRI_LNC115	16	31449535	31497814	-	16:31449535-31497814:-	AC026471.4	NA	M0,M1,M2,	NA	NA	3	1541	lnc-ZNF843-2	lnc-ZNF843-2:5	k	NONHSAG019154.2	NONHSAT141906.2	k	AC026471.4	ENST00000569291.1	k	yes
MN298435	LHRI_LNC1327.1	LHRI_LNC1327	7	113523435	113523688	-	7:113523435-113523688:-	NA	NA	M2,	NA	NA	1	254	-	-	u	-	-	u	-	-	u		Yes
MN297234	LHRI_LNC2057.1	LHRI_LNC2057	14	32270739	32271781	-	14:32270739-32271781:-	AL136298.3	NA	M0,M1,M2,	NA	CTCF Binding Site,Promoter,	1	1043	-	-	u	NONHSAG014651.1	NONHSAT036293.1	i	-	-	u
MN297774	LHRI_LNC605.1	LHRI_LNC605	2	237689833	237691845	-	2:237689833-237691845:-	LRRFIP1	M0,M1,	NA	M1,M2,M0,	Promoter,	2	1512	lnc-RAB17-6	lnc-RAB17-6:5	j	-	-	u	-	-	u
MK280665	LHRI_LNC1659.3	LHRI_LNC1659	X	87703797	87704297	-	X:87703797-87704297:-	RPSAP15	NA	M2,	NA	NA	2	382	-	-	u	-	-	u	-	-	u		Yes
MN297150	LHRI_LNC1946.1	LHRI_LNC1946	12	48932332	48934911	-	12:48932332-48934911:-	AC073610.3	NA	M0,M1,M2,	NA	TF binding site,	1	2580	-	-	u	-	-	u	-	-	u		Yes
MK280408	LHRI_LNC809.2	LHRI_LNC809	3	46361850	46371586	-	3:46361850-46371586:-	AC098613.1	M0,	M1,M0,M2,	M0,	CTCF Binding Site,Promoter Flanking Region,	3	3667	lnc-LTF-1	lnc-LTF-1:4	j	NONHSAG034950.2	NONHSAT089434.2	j	AC098613.1	ENST00000451485.1	j	yes
MN298067	LHRI_LNC906.1	LHRI_LNC906	3	193155166	193155424	-	3:193155166-193155424:-	AC092966.1	NA	M1,M0,M2,	NA	NA	1	259	lnc-ATP13A5-1	lnc-ATP13A5-1:1	i	NONHSAG036993.2	NONHSAT094004.2	i	AC092966.1	ENST00000414895.1	i	yes
MN298068	LHRI_LNC907.1	LHRI_LNC907	3	194584011	194590249	+	3:194584011-194590249:+	TMEM44-AS1	M1,M0,	M1,M2,	M0,M1,	Promoter,Enhancer,	4	1234	TMEM44-AS1	TMEM44-AS1:6	j	NONHSAG037034.2	NONHSAT094103.2	j	TMEM44-AS1	ENST00000453671.5	j	yes
MN297434	LHRI_LNC199.1	LHRI_LNC199	17	30751182	30966278	+	17:30751182-30966278:+	AC138207.5	NA	M1,M0,M2,	NA	NA	3	2261	lnc-TEFM-3	lnc-TEFM-3:1	s	NONHSAG021424.2	NONHSAT052843.2	s	AC138207.5	ENST00000579561.1	s	yes
MN296975	LHRI_LNC1726.1	LHRI_LNC1726	10	44947380	44957451	-	10:44947380-44957451:-	AL353801.1	M1,M0,	M2,M0,M1,	M0,M1,M2,	Promoter Flanking Region,Promoter,	1	10072	TMEM72-AS1	TMEM72-AS1:13	c	NONHSAG005752.2	NONHSAT155446.1	x	AL353801.1	ENST00000425541.2	x	yes
MK280523	LHRI_LNC1255.1	LHRI_LNC1255	7	2721887	2722237	-	7:2721887-2722237:-	AMZ1	NA	M2,M1,M0,	NA	Open chromatin,	1	351	lnc-GNA12-1	lnc-GNA12-1:1	e	NONHSAG046805.2	NONHSAT213099.1	c	-	-	u
MN297423	LHRI_LNC184.1	LHRI_LNC184	17	18665836	18666636	-	17:18665836-18666636:-	ZNF286B	NA	M1,M0,M2,	NA	Open chromatin,	1	801	lnc-TBC1D28-1	lnc-TBC1D28-1:1	p	NONHSAG021072.2	NONHSAT146396.2	p	AC026271.3	ENST00000578214.1	p	Yes?
MN298575	LHRI_LNC1490.1	LHRI_LNC1490	9	35604414	35605146	+	9:35604414-35605146:+	NA	M0,M1,	M2,M0,M1,	NA	Promoter,	1	733	lnc-CD72-1	lnc-CD72-1:1	x	NONHSAG052112.1	NONHSAT130947.1	x	-	-	u
MN298426	LHRI_LNC1312.1	LHRI_LNC1312	7	100408886	100409326	+	7:100408886-100409326:+	ZCWPW1	NA	M0,M1,M2,	NA	Open chromatin,CTCF Binding Site,	1	441	-	-	u	-	-	u	-	-	u		Yes
MK280462	LHRI_LNC1053.1	LHRI_LNC1053	5	74294429	74307231	+	5:74294429-74307231:+	LINC01335	NA	NA	NA	Enhancer,	3	335	lnc-HEXB-4	lnc-HEXB-4:1	j	NONHSAG040721.2	NONHSAT102151.2	j	LINC01335	ENST00000507890.1	x	Yes?
MN296882	LHRI_LNC771.1	LHRI_LNC771	1	155050950	155051158	-	1:155050950-155051158:-	ADAM15	M1,M0,	M2,M1,M0,	M1,	Promoter,	1	209	DCST1-AS1	DCST1-AS1:18	c	NONHSAG003044.2	NONHSAT006668.2	c	-	-	u
MN298704	LHRI_LNC1656.1	LHRI_LNC1656	X	78130658	78130961	+	X:78130658-78130961:+	TAF9B	NA	M1,M0,M2,	NA	NA	1	304	-	-	u	-	-	u	-	-	u		Yes
MK280129	LHRI_LNC2018.2	LHRI_LNC2018	13	44142253	44172845	+	13:44142253-44172845:+	SMIM2-AS1	M0,	NA	M1,M0,	Promoter,	4	846	SMIM2-AS1	SMIM2-AS1:13	j	NONHSAG013375.2	NONHSAT165622.1	j	SMIM2-AS1	ENST00000618753.4	j	yes
MK280443	LHRI_LNC960.1	LHRI_LNC960	4	73258842	73259161	-	4:73258842-73259161:-	NA	M0,M1,	M1,M2,	M0,M1,	Promoter,	1	320	lnc-ALB-1	lnc-ALB-1:2	x	NONHSAG038166.2	NONHSAT096836.2	x	-	-	u
MN298565	LHRI_LNC1480.1	LHRI_LNC1480	9	14640380	14642062	-	9:14640380-14642062:-	ZDHHC21	NA	M1,M0,M2,	NA	NA	1	1683	-	-	u	-	-	u	-	-	u		Yes
MN298169	LHRI_LNC1029.1	LHRI_LNC1029	5	36870202	36877661	-	5:36870202-36877661:-	NIPBL	M0,M1,	NA	M1,M0,	Promoter,	2	7371	NIPBL-DT	NIPBL-DT:12	k	NONHSAG040194.1	NONHSAT101045.1	o	NIPBL-DT	ENST00000649921.1	k	yes
MN297947	LHRI_LNC772.6	LHRI_LNC772	3	11192242	11225917	-	3:11192242-11225917:-	HRH1	M0,M1,	M0,M1,M2,	M1,M0,	Promoter,Enhancer,Open chromatin,	3	2080	lnc-VGLL4-9	lnc-VGLL4-9:4	j	NONHSAG085340.1	NONHSAT195410.1	j	AC083855.2	ENST00000648436.1	j	yes
MN298111	LHRI_LNC955.1	LHRI_LNC955	4	52662002	52664273	+	4:52662002-52664273:+	USP46-AS1	M0,M1,	M1,	NA	Open chromatin,Promoter,CTCF Binding Site,	1	2272	USP46-AS1	USP46-AS1:9	c	NONHSAG037933.2	NONHSAT096366.2	c	USP46-AS1	ENST00000503051.1	p	yes
MN298374	LHRI_LNC1253.1	LHRI_LNC1253	7	964414	965987	-	7:964414-965987:-	COX19	NA	M2,M0,M1,	NA	Promoter Flanking Region,	1	1574	-	-	u	NONHSAG046746.1	NONHSAT118672.1	i	-	-	u
MN296924	LHRI_LNC1325.1	LHRI_LNC1325	1	211600656	211606985	-	1:211600656-211606985:-	NA	M0,M1,	M1,	M1,M0,	Enhancer,Promoter Flanking Region,	1	6330	lnc-TRAF5-11	lnc-TRAF5-11:1	i	NONHSAG058444.1	NONHSAT152856.1	e	-	-	u
MK280013	LHRI_LNC1733.2	LHRI_LNC1733	10	48656373	48660407	+	10:48656373-48660407:+	ARHGAP22,NA	M1,M0,	M0,M1,	M1,M0,	TF binding site,Promoter,CTCF Binding Site,	2	3988	-	-	u	-	-	u	-	-	u		Yes
MN298370	LHRI_LNC1246.6	LHRI_LNC1246	7	137256	165322	+	7:137256-165322:+	AC093627.4	NA	M1,M0,M2,	NA	Promoter Flanking Region,Open chromatin,	4	8567	lnc-FAM20C-3	lnc-FAM20C-3:12	j	NONHSAG046715.2	NONHSAT118603.2	j	AC093627.4	ENST00000648846.1	j	yes
MK279989	LHRI_LNC1068.5	LHRI_LNC1068	1	178126125	178136040	+	1:178126125-178136040:+	RASAL2	NA	M0,M1,M2,	M1,M0,	Promoter Flanking Region,	2	2363	-	-	u	NONHSAG003565.1	NONHSAT007816.1	i	-	-	u
MK280672	LHRI_LNC1673.1	LHRI_LNC1673	X	116104853	116105302	-	X:116104853-116105302:-	API5P1	NA	M0,M1,M2,	NA	NA	1	450	-	-	u	NONHSAG103865.1	NONHSAT223523.1	e	-	-	u
MN297981	LHRI_LNC802.4	LHRI_LNC802	3	45076473	45212804	+	3:45076473-45212804:+	CDCP1	NA	M2,M1,M0,	M1,	CTCF Binding Site,Open chromatin,Promoter Flanking Region,	9	15470	lnc-CLEC3B-4	lnc-CLEC3B-4:1	k	NONHSAG084613.1	NONHSAT193832.1	j	-	-	u
MN296900	LHRI_LNC1159.1	LHRI_LNC1159	1	193257326	193257572	+	1:193257326-193257572:+	NA	NA	M2,M0,M1,	NA	CTCF Binding Site,	1	247	lnc-CDC73-5	lnc-CDC73-5:1	i	NONHSAG003821.2	NONHSAT008565.2	i	-	-	u
MN297374	LHRI_LNC120.7	LHRI_LNC120	16	53077549	53154544	+	16:53077549-53154544:+	CHD9	NA	M1,M0,M2,	NA	Promoter Flanking Region,CTCF Binding Site,	3	250	lnc-RBL2-7	lnc-RBL2-7:2	y	NONHSAG019470.1	NONHSAT142557.1	x	-	-	u
MN298191	LHRI_LNC1051.1	LHRI_LNC1051	5	70480532	70481946	+	5:70480532-70481946:+	AC146944.2	NA	M1,M0,M2,	NA	NA	1	1415	lnc-NAIP-2	lnc-NAIP-2:6	x	NONHSAG040620.2	NONHSAT204282.1	i	-	-	u
MN297422	LHRI_LNC186.1	LHRI_LNC186	17	18259193	18304224	+	17:18259193-18304224:+	TOP3A	M0,M1,	M2,M0,M1,	M1,M0,	Promoter,	2	264	lnc-TOP3A-1	lnc-TOP3A-1:1	i	NONHSAG073562.1	NONHSAT175997.1	i	AC127537.1	ENST00000566532.1	y	yes
MK280082	LHRI_LNC1887.1	LHRI_LNC1887	11	118991005	118997992	-	11:118991005-118997992:-	AP003392.4	M0,M1,	M2,M1,M0,	NA	Promoter,	2	1479	lnc-RPS25-1	lnc-RPS25-1:24	j	NONHSAG009789.2	NONHSAT024534.2	j	AP003392.4	ENST00000526453.1	j	yes
MN296783	LHRI_LNC919.1	LHRI_LNC919	1	9182740	9183074	+	1:9182740-9183074:+	MIR34AHG	M1,M0,	M2,M0,M1,	M0,M1,	Promoter,	1	335	LINC01759	LINC01759:25	c	NONHSAG000311.2	NONHSAT000793.2	c	MIR34AHG	ENST00000635405.2	x	yes
MN297631	LHRI_LNC427.1	LHRI_LNC427	2	27067471	27067943	-	2:27067471-27067943:-	AGBL5	NA	M2,M0,M1,	NA	NA	1	473	-	-	u	NONHSAG077214.1	NONHSAT181465.1	x	-	-	u
MN297076	LHRI_LNC1849.1	LHRI_LNC1849	11	65961747	65962083	-	11:65961747-65962083:-	SART1	M0,M1,	M2,M0,M1,	M1,M0,	Promoter,	1	337	-	-	u	-	-	u	-	-	u		Yes
MK280110	LHRI_LNC1958.7	LHRI_LNC1958	12	55830841	55836244	+	12:55830841-55836244:+	TMEM198B	M0,M1,	M2,M0,	NA	Promoter,	5	1905	lnc-ORMDL2-1	lnc-ORMDL2-1:1	j	NONHSAG011325.2	NONHSAT028687.2	j	-	-	u
MN298472	LHRI_LNC1374.2	LHRI_LNC1374	8	1747626	1755799	-	8:1747626-1755799:-	CLN8	NA	M2,	M1,M0,	Promoter Flanking Region,	4	1558	lnc-ERICH1-20	lnc-ERICH1-20:2	j	NONHSAG099264.1	NONHSAT216709.1	o	-	-	u
MN298668	LHRI_LNC1578.1	LHRI_LNC1578	9	136800592	136803158	-	9:136800592-136803158:-	CCDC183	NA	M0,M1,M2,	NA	TF binding site,	2	2499	CCDC183-AS1	CCDC183-AS1:3	o	NONHSAG053813.2	NONHSAT135603.2	o	AL355987.4	ENST00000415992.5	x	yes
MN297689	LHRI_LNC497.1	LHRI_LNC497	2	96834373	96835222	+	2:96834373-96835222:+	ANKRD23	NA	M2,M1,M0,	NA	Promoter Flanking Region,	1	850	lnc-ANKRD23-1	lnc-ANKRD23-1:1	i	NONHSAG028626.2	NONHSAT182202.1	i	-	-	u
MN297045	LHRI_LNC1824.1	LHRI_LNC1824	11	60951815	60952106	+	11:60951815-60952106:+	SLC15A3	M1,M0,	M1,M0,M2,	M1,M0,	Promoter,	1	292	-	-	u	-	-	u	-	-	u		Yes
MN297246	LHRI_LNC2063.6	LHRI_LNC2063	14	49853621	50202110	-	14:49853621-50202110:-	RN7SL2,RN7SL3	NA	M0,M1,M2,	NA	NA	3	536	lnc-NEMF-2	lnc-NEMF-2:2	o	NONHSAG014889.2	NONHSAT036748.2	o	AL627171.1	ENST00000618845.1	x	yes
MN298187	LHRI_LNC1048.1	LHRI_LNC1048	5	60867693	60868361	-	5:60867693-60868361:-	NA	NA	M1,M2,	NA	NA	1	669	-	-	u	-	-	u	-	-	u		Yes
MN297379	LHRI_LNC133.1	LHRI_LNC133	16	69755514	69755798	-	16:69755514-69755798:-	AC092115.1	M0,M1,	M2,M0,	NA	Promoter,	1	285	lnc-NOB1-1	lnc-NOB1-1:1	p	-	-	u	-	-	u
MN298494	LHRI_LNC1395.1	LHRI_LNC1395	8	53044228	53044430	-	8:53044228-53044430:-	NA	NA	NA	NA	NA	1	203	-	-	u	NONHSAG050213.1	NONHSAT126550.1	p	-	-	u
MN298340	LHRI_LNC1217.1	LHRI_LNC1217	6	134632133	134633293	-	6:134632133-134633293:-	AL078590.3	NA	NA	NA	CTCF Binding Site,Open chromatin,Enhancer,Promoter Flanking Region,	1	1161	lnc-SGK1-3	lnc-SGK1-3:8	i	NONHSAG044894.2	NONHSAT209715.1	i	AL078590.3	ENST00000650393.1	i	yes
MK280590	LHRI_LNC1412.5	LHRI_LNC1412	8	71844103	71967984	+	8:71844103-71967984:+	MSC-AS1	M0,M1,	M1,M0,M2,	M1,	Promoter,	4	1815	MSC-AS1	MSC-AS1:1	j	NONHSAG050493.2	NONHSAT127203.2	j	MSC-AS1	ENST00000518916.5	j	yes
MN297896	LHRI_LNC704.1	LHRI_LNC704	21	42841952	42842215	+	21:42841952-42842215:+	NA	NA	M2,M0,M1,	NA	NA	1	264	-	-	u	-	-	u	-	-	u		Yes
MK280099	LHRI_LNC1930.1	LHRI_LNC1930	12	20553768	20554026	+	12:20553768-20554026:+	PDE3A	NA	M0,M1,M2,	NA	NA	1	259	-	-	u	NONHSAG010644.1	NONHSAT027229.1	i	-	-	u
MK280050	LHRI_LNC1825.1	LHRI_LNC1825	11	61076029	61078326	+	11:61076029-61078326:+	NA	NA	M0,	NA	Promoter Flanking Region,	2	843	lnc-VPS37C-3	lnc-VPS37C-3:1	i	NONHSAG008450.2	NONHSAT021620.2	i	-	-	u
MN296938	LHRI_LNC1464.1	LHRI_LNC1464	1	228398717	228399238	-	1:228398717-228399238:-	TRIM11	NA	M0,M1,M2,	NA	NA	1	522	-	-	u	-	-	u	-	-	u		Yes
MN298348	LHRI_LNC1224.1	LHRI_LNC1224	6	145871851	145873284	+	6:145871851-145873284:+	SHPRH	NA	M0,M2,	NA	NA	1	1434	lnc-GRM1-1	lnc-GRM1-1:31	c	NONHSAG045070.2	NONHSAT208200.1	i	AL356599.1	ENST00000452617.5	i	Yes?
MN298622	LHRI_LNC1525.1	LHRI_LNC1525	9	72317392	72319228	+	9:72317392-72319228:+	LINC01504	NA	M1,M0,M2,	NA	Promoter Flanking Region,	1	1837	LINC01504	LINC01504:4	i	NONHSAG052554.2	NONHSAT131858.2	i	LINC01504	ENST00000436054.1	i	yes
MN298221	LHRI_LNC1094.1	LHRI_LNC1094	5	140582542	140613199	+	5:140582542-140613199:+	AC116353.5	NA	M0,	NA	CTCF Binding Site,	3	649	lnc-APBB3-3	lnc-APBB3-3:1	x	NONHSAG041757.1	NONHSAT104248.1	x	AC116353.4	ENST00000507279.5	x	yes
MN297147	LHRI_LNC1942.10	LHRI_LNC1942	12	47205941	47210737	-	12:47205941-47210737:-	PCED1B-AS1	NA	M2,	NA	Promoter Flanking Region,	4	556	PCED1B-AS1	PCED1B-AS1:24	j	NONHSAG010999.2	NONHSAT027900.2	j	PCED1B-AS1	ENST00000550426.5	j	yes
MN297013	LHRI_LNC1784.1	LHRI_LNC1784	10	117268999	117269282	-	10:117268999-117269282:-	SLC18A2	NA	NA	NA	NA	1	284	lnc-PDZD8-7	lnc-PDZD8-7:1	p	NONHSAG006933.1	NONHSAT016477.1	i	-	-	u
MN298365	LHRI_LNC1241.1	LHRI_LNC1241	6	170308000	170308464	+	6:170308000-170308464:+	FAM120B	M1,M0,	M1,M0,M2,	M0,	Promoter,	1	465	lnc-TBP-9	lnc-TBP-9:1	i	-	-	u	-	-	u
MN297251	LHRI_LNC2063.12	LHRI_LNC2063	14	49860197	50202134	-	14:49860197-50202134:-	RN7SL2,RN7SL3	NA	M2,M0,M1,	NA	NA	3	360	lnc-NEMF-1	lnc-NEMF-1:5	o	NONHSAG014892.2	NONHSAT036752.2	o	AL627171.1	ENST00000618845.1	x	yes
MN297628	LHRI_LNC423.1	LHRI_LNC423	2	25336033	25340865	-	2:25336033-25340865:-	DNMT3A	M1,M0,	M0,M1,M2,	NA	Promoter,	1	4833	lnc-EFR3B-7	lnc-EFR3B-7:1	x	-	-	u	-	-	u
MK280274	LHRI_LNC415.1	LHRI_LNC415	2	10871471	10885150	+	2:10871471-10885150:+	LINC01954	NA	NA	NA	Open chromatin,CTCF Binding Site,	4	662	LINC01954	LINC01954:12	j	NONHSAG026993.2	NONHSAT181264.1	j	LINC01954	ENST00000607419.1	j	yes
MK280009	LHRI_LNC1720.1	LHRI_LNC1720	10	34391029	34391404	-	10:34391029-34391404:-	PARD3	NA	M1,	NA	CTCF Binding Site,	1	376	-	-	u	-	-	u	-	-	u		Yes
MK280527	LHRI_LNC1264.19	LHRI_LNC1264	7	24761136	24785125	-	7:24761136-24785125:-	NA	NA	NA	M0,M1,	Open chromatin,Enhancer,CTCF Binding Site,	3	1207	lnc-GSDME-1	lnc-GSDME-1:1	j	NONHSAG047136.2	NONHSAT213278.1	j	-	-	u
MK280091	LHRI_LNC1910.1	LHRI_LNC1910	12	6927560	6927949	+	12:6927560-6927949:+	ATN1	M0,M1,	NA	NA	Promoter,	1	390	-	-	u	-	-	u	-	-	u		Yes
MN298540	LHRI_LNC1450.1	LHRI_LNC1450	8	132872188	132872388	+	8:132872188-132872388:+	TG	NA	M2,	NA	Open chromatin,	1	201	-	-	u	NONHSAG099144.1	NONHSAT216470.1	i	-	-	u
MN297487	LHRI_LNC238.1	LHRI_LNC238	17	50745731	50745998	-	17:50745731-50745998:-	LUC7L3	NA	M2,M1,M0,	NA	NA	1	268	-	-	u	NONHSAG022201.2	NONHSAT175357.1	x	-	-	u
MN298513	LHRI_LNC1419.2	LHRI_LNC1419	8	81154317	81164582	+	8:81154317-81164582:+	AC079209.1	NA	NA	M0,	Enhancer,Promoter Flanking Region,	4	560	lnc-FABP5-2	lnc-FABP5-2:9	j	NONHSAG050616.2	NONHSAT127440.2	j	AC079209.1	ENST00000519412.1	j	Yes?
MK280563	LHRI_LNC1350.1	LHRI_LNC1350	7	143361653	143364358	+	7:143361653-143364358:+	AC093673.2	M1,	M2,	NA	Promoter,	2	580	lnc-CLCN1-1	lnc-CLCN1-1:2	k	NONHSAG049036.2	NONHSAT212815.1	k	AC093673.2	ENST00000609674.1	k	yes
MN298032	LHRI_LNC857.1	LHRI_LNC857	3	129626888	129627533	+	3:129626888-129627533:+	NA	M0,	NA	M2,M1,M0,	Promoter Flanking Region,	1	646	lnc-H1FOO-2	lnc-H1FOO-2:3	c	NONHSAG036068.1	NONHSAT092080.1	c	-	-	u
MN298580	LHRI_LNC1497.1	LHRI_LNC1497	9	37774029	37776236	-	9:37774029-37776236:-	TRMT10B	NA	M1,M0,M2,	NA	Open chromatin,	1	2208	-	-	u	-	-	u	-	-	u		Yes
MN297216	LHRI_LNC2032.1	LHRI_LNC2032	13	76592911	76593545	+	13:76592911-76593545:+	NA	NA	M2,	NA	NA	1	635	-	-	u	-	-	u	AL136441.1	ENST00000648060.1	i	yes
MN298376	LHRI_LNC1254.1	LHRI_LNC1254	7	2631940	2632327	-	7:2631940-2632327:-	TTYH3	M1,M0,	M2,M1,M0,	M1,M0,	Promoter,	1	388	-	-	u	-	-	u	-	-	u		Yes
MK280656	LHRI_LNC695.1	LHRI_LNC695	21	33593227	33594289	-	21:33593227-33594289:-	CRYZL1	NA	M1,M0,M2,	NA	NA	1	1063	lnc-DONSON-2	lnc-DONSON-2:2	i	-	-	u	-	-	u
MN296822	LHRI_LNC213.2	LHRI_LNC213	1	87203060	87205579	+	1:87203060-87205579:+	AC099062.1,NA	NA	NA	NA	Promoter Flanking Region,	3	1158	lnc-LMO4-2	lnc-LMO4-2:18	j	NONHSAG001985.1	NONHSAT004274.1	y	-	-	u
MN297452	LHRI_LNC217.4	LHRI_LNC217	17	43233434	43273292	-	17:43233434-43273292:-	RF00004	M1,	M2,	M0,M2,M1,	Promoter,	4	545	lnc-LINC00854-1	lnc-LINC00854-1:21	i	NONHSAG021967.1	NONHSAT054022.1	o	-	-	u
MN297128	LHRI_LNC1914.1	LHRI_LNC1914	12	9313565	9314083	+	12:9313565-9314083:+	AC009533.1	NA	M1,M0,M2,	NA	Open chromatin,	1	519	lnc-KLRG1-6	lnc-KLRG1-6:1	c	NONHSAG010438.2	NONHSAT026397.2	p	-	-	u
MN298006	LHRI_LNC829.1	LHRI_LNC829	3	63908216	63908480	+	3:63908216-63908480:+	ATXN7	NA	M1,M0,M2,	NA	Open chromatin,	1	265	-	-	u	-	-	u	-	-	u		Yes
MN298499	LHRI_LNC1399.1	LHRI_LNC1399	8	58420169	58420492	-	8:58420169-58420492:-	UBXN2B	NA	M2,M1,M0,	NA	NA	1	324	lnc-CYP7A1-5	lnc-CYP7A1-5:1	p	NONHSAG050298.1	NONHSAT126757.1	i	-	-	u
MK280302	LHRI_LNC520.2	LHRI_LNC520	2	113230614	113240825	+	2:113230614-113240825:+	PAX8-AS1	NA	NA	NA	Open chromatin,	3	1209	PAX8-AS1	PAX8-AS1:37	j	NONHSAG029003.2	NONHSAT073753.2	j	PAX8-AS1	ENST00000456685.5	j	yes
MN297298	LHRI_LNC2123.1	LHRI_LNC2123	15	56003659	56003962	-	15:56003659-56003962:-	CNOT6LP1	NA	M0,M1,M2,	NA	Open chromatin,	1	304	lnc-TEX9-6	lnc-TEX9-6:3	x	-	-	u	-	-	u
MN297493	LHRI_LNC246.1	LHRI_LNC246	17	59205891	59206761	+	17:59205891-59206761:+	AC099850.2	NA	M2,M0,M1,	NA	NA	1	871	-	-	u	-	-	u	-	-	u		Yes
MN296850	LHRI_LNC386.1	LHRI_LNC386	1	116404737	116405027	-	1:116404737-116405027:-	ATP1A1	NA	M1,M0,M2,	NA	Open chromatin,	1	291	ATP1A1-AS1	ATP1A1-AS1:3	c	NONHSAG002530.2	NONHSAT005431.2	c	ATP1A1-AS1	ENST00000608511.5	i	Yes?
MK280490	LHRI_LNC1138.27	LHRI_LNC1138	6	6772418	6801246	-	6:6772418-6801246:-	AL031123.1,BTF3P7	NA	M2,	M0,M1,	Promoter Flanking Region,Enhancer,	4	18417	lnc-F13A1-3	lnc-F13A1-3:16	j	NONHSAG093929.1	NONHSAT208684.1	o	-	-	u
MN297497	LHRI_LNC251.1	LHRI_LNC251	17	62475858	62478140	-	17:62475858-62478140:-	TLK2	M1,M0,	NA	M0,M1,	Promoter,	1	2283	lnc-MARCH10-8	lnc-MARCH10-8:4	c	NONHSAG022500.1	NONHSAT055280.1	e	-	-	u
MN296809	LHRI_LNC2125.1	LHRI_LNC2125	1	48437453	48437833	+	1:48437453-48437833:+	SPATA6	NA	M0,M2,	NA	TF binding site,CTCF Binding Site,	1	381	lnc-AGBL4-8	lnc-AGBL4-8:1	i	NONHSAG001390.1	NONHSAT003102.1	i	-	-	u
MN296849	LHRI_LNC396.1	LHRI_LNC396	1	114915263	114915474	-	1:114915263-114915474:-	SYCP1	NA	M2,M0,M1,	NA	NA	1	212	-	-	u	-	-	u	-	-	u		Yes
MN298595	LHRI_LNC1510.1	LHRI_LNC1510	9	62806876	62808028	+	9:62806876-62808028:+	LINC01410	NA	M1,M0,M2,	NA	CTCF Binding Site,	1	1153	LINC01410	LINC01410:9	c	NONHSAG052409.2	NONHSAT131524.2	i	LINC01410	ENST00000424345.5	i	yes
MN297264	LHRI_LNC2079.1	LHRI_LNC2079	14	74941882	74945934	+	14:74941882-74945934:+	PGF	NA	M2,	M0,M1,M2,	Promoter Flanking Region,	3	1329	lnc-RPS6KL1-1	lnc-RPS6KL1-1:2	x	NONHSAG068870.1	NONHSAT168646.1	y	-	-	u
MN297079	LHRI_LNC1853.1	LHRI_LNC1853	11	68913062	68913482	+	11:68913062-68913482:+	IGHMBP2	NA	M2,M0,M1,	NA	NA	1	421	-	-	u	-	-	u	-	-	u		Yes
MN298721	LHRI_LNC1681.1	LHRI_LNC1681	X	145438035	145438389	-	X:145438035-145438389:-	NA	NA	M2,M1,	NA	CTCF Binding Site,	1	355	-	-	u	-	-	u	-	-	u		Yes
MN297198	LHRI_LNC2001.1	LHRI_LNC2001	12	121664134	121677296	+	12:121664134-121677296:+	MORN3	NA	M1,M0,M2,	M0,	Promoter Flanking Region,	2	223	lnc-TMEM120B-1	lnc-TMEM120B-1:3	j	NONHSAG012540.2	NONHSAT031417.2	i	-	-	u
MK280258	LHRI_LNC298.1	LHRI_LNC298	18	68278297	68278601	+	18:68278297-68278601:+	NA	NA	M2,M0,M1,	NA	Open chromatin,	1	305	LINC01912	LINC01912:7	i	NONHSAG074880.1	NONHSAT177939.1	i	-	-	u
MK280614	LHRI_LNC1508.7	LHRI_LNC1508	9	40992317	41007547	+	9:40992317-41007547:+	FRG1HP	M0,M1,	M2,M1,M0,	M2,M1,M0,	Promoter,	3	634	lnc-ANKRD20A2-22	lnc-ANKRD20A2-22:2	j	NONHSAG052454.2	NONHSAT131633.2	j	-	-	u
MN297161	LHRI_LNC1963.1	LHRI_LNC1963	12	62557071	62557627	+	12:62557071-62557627:+	MON2	NA	M2,M1,M0,	NA	NA	1	557	-	-	u	NONHSAG011494.1	NONHSAT029069.1	i	-	-	u
MN297777	LHRI_LNC610.1	LHRI_LNC610	2	240558890	240560064	-	2:240558890-240560064:-	DUSP28	M1,M0,	M2,M1,M0,	M0,M1,	Promoter,	1	1175	lnc-DUSP28-1	lnc-DUSP28-1:1	x	NONHSAG030982.2	NONHSAT077830.2	x	-	-	u
MN297932	LHRI_LNC757.1	LHRI_LNC757	22	46537665	46539721	+	22:46537665-46539721:+	NA	M0,M1,	M0,M1,M2,	NA	Promoter,CTCF Binding Site,	1	2057	lnc-GRAMD4-2	lnc-GRAMD4-2:6	c	NONHSAG034160.1	NONHSAT087284.1	e	-	-	u
MN298128	LHRI_LNC982.1	LHRI_LNC982	4	122077120	122077590	-	4:122077120-122077590:-	AC097533.1	NA	M2,M0,M1,	NA	Enhancer,	1	471	lnc-TRPC3-2	lnc-TRPC3-2:3	o	NONHSAG038796.2	NONHSAT098157.2	p	-	-	u
MN298617	LHRI_LNC1523.15	LHRI_LNC1523	9	72273524	72291846	-	9:72273524-72291846:-	GDA,AL135924.1,NA	NA	M2,M0,	M0,	CTCF Binding Site,Promoter Flanking Region,	5	2563	lnc-GDA-3	lnc-GDA-3:1	x	NONHSAG052553.2	NONHSAT131854.2	x	-	-	u
MK280476	LHRI_LNC390.1	LHRI_LNC390	19	51770630	51771391	+	19:51770630-51771391:+	FPR1	NA	M1,	M1,	Promoter Flanking Region,Open chromatin,CTCF Binding Site,	1	762	-	-	u	NONHSAG026355.1	NONHSAT067424.1	e	-	-	u
MN298226	LHRI_LNC1106.1	LHRI_LNC1106	5	151726353	151728959	-	5:151726353-151728959:-	NA	NA	M2,M1,M0,	NA	CTCF Binding Site,Open chromatin,	1	2607	lnc-ATOX1-4	lnc-ATOX1-4:1	p	-	-	u	-	-	u
MN298408	LHRI_LNC1289.1	LHRI_LNC1289	7	66670683	66689710	+	7:66670683-66689710:+	AC027644.4	NA	M2,M1,M0,	M1,M0,	Enhancer,Promoter Flanking Region,	2	1789	lnc-RABGEF1-3	lnc-RABGEF1-3:3	y	NONHSAG047851.2	NONHSAT212200.1	y	-	-	u
MN297477	LHRI_LNC215.1	LHRI_LNC215	17	43345798	43346219	+	17:43345798-43346219:+	NA	NA	M1,M2,	NA	CTCF Binding Site,	1	422	LINC00910	LINC00910:32	i	NONHSAG021978.1	NONHSAT054077.1	o	-	-	u
MN297107	LHRI_LNC1888.1	LHRI_LNC1888	11	123062562	123063198	+	11:123062562-123063198:+	HSPA8	M0,M1,	M2,M1,M0,	M2,M1,M0,	Promoter,	1	637	lnc-JHY-5	lnc-JHY-5:1	e	NONHSAG009898.2	NONHSAT024839.2	e	-	-	u
MN296957	LHRI_LNC1702.1	LHRI_LNC1702	10	17719660	17720409	+	10:17719660-17720409:+	NA	NA	M2,M0,M1,	NA	NA	1	750	-	-	u	-	-	u	-	-	u		Yes
MN298150	LHRI_LNC1010.1	LHRI_LNC1010	4	177659701	177659988	-	4:177659701-177659988:-	AC078881.1	NA	M1,M2,	NA	CTCF Binding Site,	1	288	lnc-NEIL3-6	lnc-NEIL3-6:2	i	NONHSAG039414.2	NONHSAT099386.2	i	AC078881.1	ENST00000507023.1	i	yes
MN298689	LHRI_LNC1629.1	LHRI_LNC1629	X	40097581	40097985	-	X:40097581-40097985:-	BCOR	NA	NA	NA	Promoter,	1	405	lnc-CXorf38-6	lnc-CXorf38-6:1	p	NONHSAG054270.2	NONHSAT136683.2	p	-	-	u
MK280610	LHRI_LNC1498.1	LHRI_LNC1498	9	37847885	37848969	-	9:37847885-37848969:-	DCAF10	NA	M0,M1,M2,	NA	NA	1	1085	lnc-DCAF10-1	lnc-DCAF10-1:1	i	NONHSAG101312.1	NONHSAT219487.1	i	-	-	u
MK280015	LHRI_LNC1738.1	LHRI_LNC1738	10	69924717	69957441	-	10:69924717-69957441:-	COL13A1	NA	NA	M0,	CTCF Binding Site,Promoter Flanking Region,	3	3299	-	-	u	NONHSAG006126.2	NONHSAT155620.1	x	-	-	u
MN298547	LHRI_LNC1460.1	LHRI_LNC1460	8	143550369	143551212	-	8:143550369-143551212:-	NA	M1,	M2,M1,M0,	NA	CTCF Binding Site,Promoter,Promoter Flanking Region,	1	844	lnc-ZC3H3-2	lnc-ZC3H3-2:1	p	NONHSAG051496.2	NONHSAT129583.2	p	-	-	u
MK280620	LHRI_LNC1503.1	LHRI_LNC1503	9	41240553	41240799	+	9:41240553-41240799:+	NA	NA	M1,M0,M2,	NA	Promoter Flanking Region,CTCF Binding Site,	1	247	-	-	u	-	-	u	-	-	u		Yes
MK280326	LHRI_LNC572.1	LHRI_LNC572	2	195549905	195552978	-	2:195549905-195552978:-	NA	NA	NA	NA	Promoter Flanking Region,	1	3074	LINC01827	LINC01827:6	i	NONHSAG030141.2	NONHSAT076174.2	i	-	-	u
MK280640	LHRI_LNC1569.1	LHRI_LNC1569	9	129483451	129512669	+	9:129483451-129512669:+	LINC00963	NA	NA	M0,M1,	Promoter,	5	8579	LINC00963	LINC00963:54	j	NONHSAG053586.2	NONHSAT135075.2	j	LINC00963	ENST00000423918.5	j	yes
MN298592	LHRI_LNC1505.1	LHRI_LNC1505	9	41358771	41374154	+	9:41358771-41374154:+	NA	M1,	NA	NA	Promoter Flanking Region,	2	1218	-	-	u	-	-	u	-	-	u		Yes
MN296769	LHRI_LNC1600.1	LHRI_LNC1600	KI270745.1	39422	39661	+	KI270745.1:39422-39661:+	NA	NA	NA	NA	TF binding site,CTCF Binding Site,	1	240	-	-	u	-	-	u	-	-	u		Yes
MK280152	LHRI_LNC2092.1	LHRI_LNC2092	14	100481280	100481531	+	14:100481280-100481531:+	WDR25	NA	M2,M1,	NA	NA	1	252	lnc-SLC25A47-8	lnc-SLC25A47-8:1	p	NONHSAG015878.1	NONHSAT039634.1	i	-	-	u
MN296820	LHRI_LNC132.1	LHRI_LNC132	1	65058513	65066505	-	1:65058513-65066505:-	AL357078.1	M0,M1,	M1,M2,	M0,M1,	Promoter,	1	7993	lnc-JAK1-2	lnc-JAK1-2:2	o	NONHSAG056517.1	NONHSAT149098.1	i	AL357078.1	ENST00000448344.1	p	Yes?
MN297286	LHRI_LNC2109.1	LHRI_LNC2109	15	32536714	32582509	+	15:32536714-32582509:+	LINC02256	M1,M0,	M2,	M0,	Promoter,	4	3277	lnc-GOLGA8N-1	lnc-GOLGA8N-1:3	j	NONHSAG016448.2	NONHSAT041505.2	j	LINC02256	ENST00000561999.1	k	yes
MN298165	LHRI_LNC1026.1	LHRI_LNC1026	5	32173363	32173702	+	5:32173363-32173702:+	GOLPH3	M1,M0,	M2,M1,M0,	M2,M1,M0,	Promoter,Open chromatin,	1	340	-	-	u	NONHSAG040137.2	NONHSAT100917.2	c	-	-	u
MN297480	LHRI_LNC224.1	LHRI_LNC224	17	45155504	45157755	-	17:45155504-45157755:-	AC138150.1	NA	M1,M0,M2,	NA	Enhancer,Promoter,	1	2252	lnc-PLCD3-1	lnc-PLCD3-1:8	c	NONHSAG021967.2	NONHSAT054022.2	c	AC138150.1	ENST00000589950.1	i	yes
MN298495	LHRI_LNC1396.1	LHRI_LNC1396	8	53342419	53342682	-	8:53342419-53342682:-	NA	NA	NA	NA	Open chromatin,	1	264	-	-	u	NONHSAG050215.1	NONHSAT126569.1	i	-	-	u
MK280343	LHRI_LNC637.1	LHRI_LNC637	20	29457924	29459784	-	20:29457924-29459784:-	NA	NA	M2,M1,M0,	NA	NA	1	1861	lnc-DEFB115-40	lnc-DEFB115-40:1	x	-	-	u	-	-	u
MN296908	LHRI_LNC1180.1	LHRI_LNC1180	1	200401571	200402246	-	1:200401571-200402246:-	AC104461.1	NA	M2,M1,M0,	NA	NA	1	676	lnc-NR5A2-1	lnc-NR5A2-1:8	i	NONHSAG003900.1	NONHSAT008694.1	i	AC104461.1	ENST00000637430.1	i	yes
MN296806	LHRI_LNC2011.1	LHRI_LNC2011	1	36405836	36410598	+	1:36405836-36410598:+	NA	NA	M0,M1,M2,	NA	NA	3	288	-	-	u	-	-	u	-	-	u		Yes
MN297652	LHRI_LNC443.8	LHRI_LNC443	2	39437431	39587017	+	2:39437431-39587017:+	AC007388.1	M0,M1,	M2,M1,M0,	M0,M1,	Promoter,	7	590	lnc-TMEM178A-1	lnc-TMEM178A-1:2	j	NONHSAG027544.2	NONHSAT070231.2	j	AC007388.1	ENST00000426083.5	j	yes
MN296906	LHRI_LNC1176.1	LHRI_LNC1176	1	198936405	198937188	-	1:198936405-198937188:-	MIR181A1HG	M0,M1,	NA	M0,	Promoter,	1	784	lnc-ATP6V1G3-4	lnc-ATP6V1G3-4:14	c	NONHSAG003880.1	NONHSAT008654.1	i	MIR181A1HG	ENST00000432296.1	i	yes
MN297166	LHRI_LNC1968.2	LHRI_LNC1968	12	67354528	67567126	+	12:67354528-67567126:+	LINC02420,LINC02408	NA	NA	NA	Promoter Flanking Region,Enhancer,CTCF Binding Site,	6	3686	LINC02408	LINC02408:7	j	NONHSAG011590.2	NONHSAT029258.2	j	LINC02408	ENST00000650195.1	j	yes
MN298616	LHRI_LNC1523.14	LHRI_LNC1523	9	72271923	72291857	-	9:72271923-72291857:-	GDA,AL135924.1,NA	NA	M0,M2,	M0,	Promoter Flanking Region,CTCF Binding Site,	3	4680	lnc-GDA-3	lnc-GDA-3:1	x	NONHSAG052553.2	NONHSAT131854.2	x	-	-	u
MN297040	LHRI_LNC1815.1	LHRI_LNC1815	11	35049933	35097876	+	11:35049933-35097876:+	NA	NA	NA	NA	Promoter Flanking Region,	3	690	lnc-CD44-7	lnc-CD44-7:2	j	NONHSAG008044.2	NONHSAT018772.2	j	-	-	u
MN298724	LHRI_LNC1688.3	LHRI_LNC1688	Y	3002998	3016974	+	Y:3002998-3016974:+	LINC00278	NA	NA	NA	NA	2	2291	LINC00278	LINC00278:3	j	NONHSAG055665.2	NONHSAT139305.2	j	LINC00278	ENST00000425031.1	j	yes
MN297131	LHRI_LNC1916.1	LHRI_LNC1916	12	10722905	10723187	+	12:10722905-10723187:+	YBX3	M0,M1,	M1,	M1,	Promoter,	1	283	lnc-STYK1-2	lnc-STYK1-2:1	x	-	-	u	-	-	u
MN297192	LHRI_LNC1995.2	LHRI_LNC1995	12	111285230	111315141	-	12:111285230-111315141:-	CUX2	NA	M0,	M0,	CTCF Binding Site,Promoter Flanking Region,	3	1842	lnc-FAM109A-3	lnc-FAM109A-3:1	j	-	-	u	-	-	u
MN296917	LHRI_LNC1272.1	LHRI_LNC1272	1	206500387	206503645	+	1:206500387-206503645:+	NA	NA	M2,M1,M0,	NA	Promoter Flanking Region,Open chromatin,	1	3259	-	-	u	-	-	u	-	-	u		Yes
MN298651	LHRI_LNC1559.1	LHRI_LNC1559	9	122266108	122266449	+	9:122266108-122266449:+	MRRF	M0,M1,	M2,M1,M0,	M0,	Promoter,	1	342	-	-	u	-	-	u	-	-	u		Yes
MN297017	LHRI_LNC1790.1	LHRI_LNC1790	10	132395360	132396739	-	10:132395360-132396739:-	NA	M1,M0,	M2,M1,M0,	NA	Promoter,	1	1380	-	-	u	NONHSAG061680.1	NONHSAT157766.1	e	-	-	u
MN297893	LHRI_LNC700.5	LHRI_LNC700	21	36430321	36481723	+	21:36430321-36481723:+	AP000695.1	NA	M2,M1,M0,	NA	Promoter Flanking Region,Promoter,	3	1965	lnc-CHAF1B-3	lnc-CHAF1B-3:1	j	NONHSAG032780.2	NONHSAT190942.1	j	AP000695.1	ENST00000429588.1	j	yes
MN298290	LHRI_LNC1158.1	LHRI_LNC1158	6	31201309	31201577	+	6:31201309-31201577:+	AL662844.3	NA	M1,M0,M2,	NA	Promoter,	1	269	lnc-HLA-B-2	lnc-HLA-B-2:6	x	NONHSAG043462.2	NONHSAT108741.2	x	AL662844.3	ENST00000606909.1	x	yes
MN298103	LHRI_LNC948.1	LHRI_LNC948	4	37870966	37871625	+	4:37870966-37871625:+	AC021106.1	NA	M2,M0,M1,	NA	Open chromatin,	1	660	lnc-PGM2-1	lnc-PGM2-1:1	p	NONHSAG037750.1	NONHSAT096018.1	e	-	-	u
MN296774	LHRI_LNC1987.1	LHRI_LNC1987	1	1313824	1314263	+	1:1313824-1314263:+	INTS11	NA	M0,M1,M2,	NA	TF binding site,	1	440	lnc-ACAP3-2	lnc-ACAP3-2:4	x	NONHSAG000097.1	NONHSAT000297.1	o	-	-	u
MN298053	LHRI_LNC887.20	LHRI_LNC887	3	158740426	158743336	+	3:158740426-158743336:+	AC080013.1	NA	M2,M0,M1,	NA	Open chromatin,	3	1121	lnc-GFM1-6	lnc-GFM1-6:1	j	NONHSAG036510.2	NONHSAT092939.2	j	AC080013.1	ENST00000468242.5	j	yes
MN298170	LHRI_LNC1030.1	LHRI_LNC1030	5	37079012	37079320	-	5:37079012-37079320:-	NA	NA	M0,M1,M2,	NA	NA	1	309	lnc-NIPBL-4	lnc-NIPBL-4:1	x	NONHSAG040199.2	NONHSAT101050.2	x	-	-	u
MN297998	LHRI_LNC820.2	LHRI_LNC820	3	52241308	52246966	-	3:52241308-52246966:-	NA,PPM1M	M1,M0,	M1,M0,M2,	M1,M0,	Promoter,	2	391	lnc-PPM1M-2	lnc-PPM1M-2:5	x	NONHSAG035159.2	NONHSAT089901.2	x	-	-	u
MN297766	LHRI_LNC590.2	LHRI_LNC590	2	216395085	216400659	+	2:216395085-216400659:+	AC098820.2	NA	M2,	NA	Promoter Flanking Region,	3	1766	lnc-SMARCAL1-1	lnc-SMARCAL1-1:2	j	NONHSAG030474.2	NONHSAT076801.2	j	AC098820.2	ENST00000457694.1	x	yes
MN297163	LHRI_LNC1965.1	LHRI_LNC1965	12	62606066	62606529	+	12:62606066-62606529:+	AC048341.1	M1,M0,	M2,M1,M0,	M1,M0,	Promoter,	1	464	lnc-MON2-2	lnc-MON2-2:9	c	NONHSAG011503.2	NONHSAT029092.2	c	AC048341.1	ENST00000550290.2	i	yes
MK280378	LHRI_LNC717.8	LHRI_LNC717	22	22298117	22310660	+	22:22298117-22310660:+	AC245060.4	NA	M2,	NA	NA	7	2990	lnc-VPREB1-7	lnc-VPREB1-7:15	j	NONHSAG033390.2	NONHSAT192063.1	j	-	-	u
MN298603	LHRI_LNC1520.1	LHRI_LNC1520	9	68393400	68393759	-	9:68393400-68393759:-	PGM5	NA	M2,M1,M0,	NA	NA	1	360	lnc-TMEM252-2	lnc-TMEM252-2:5	p	NONHSAG052448.1	NONHSAT131613.1	p	AL161457.2	ENST00000590767.5	p	yes
MK280234	LHRI_LNC229.6	LHRI_LNC229	17	47047427	47100323	-	17:47047427-47100323:-	AC068152.1	M1,M0,	NA	NA	Promoter,	3	9583	lnc-RPRML-3	lnc-RPRML-3:22	k	NONHSAG022030.2	NONHSAT054259.2	k	AC068152.1	ENST00000571901.5	j	yes
MN296800	LHRI_LNC1883.1	LHRI_LNC1883	1	26695718	26695957	+	1:26695718-26695957:+	ARID1A	M0,M1,	NA	M1,M0,	Promoter,	1	240	lnc-GPN2-2	lnc-GPN2-2:2	x	-	-	u	-	-	u
MN297176	LHRI_LNC1979.1	LHRI_LNC1979	12	89524892	89525159	+	12:89524892-89525159:+	POC1B	M1,M0,	M1,M0,M2,	NA	Promoter,	1	268	lnc-GALNT4-1	lnc-GALNT4-1:1	x	NONHSAG011861.1	NONHSAT029802.1	x	-	-	u
MN297343	LHRI_LNC76.1	LHRI_LNC76	16	2682033	2682395	-	16:2682033-2682395:-	NA	M0,M1,	M1,M0,M2,	M0,	Open chromatin,Promoter,	1	363	lnc-PRSS27-2	lnc-PRSS27-2:20	c	NONHSAG071965.1	NONHSAT173526.1	i	-	-	u
MK280294	LHRI_LNC505.1	LHRI_LNC505	2	97663032	97663637	+	2:97663032-97663637:+	ACTR1B	M1,M0,	M2,M1,M0,	M0,M1,	Promoter,	1	606	-	-	u	-	-	u	-	-	u		Yes
MN297077	LHRI_LNC1850.1	LHRI_LNC1850	11	66837115	66843348	-	11:66837115-66843348:-	RCE1	M0,M1,	M0,M1,M2,	M0,M1,	Promoter,	1	6234	lnc-PC-2	lnc-PC-2:1	c	NONHSAG008776.1	NONHSAT022373.1	x	-	-	u
MN297591	LHRI_LNC370.1	LHRI_LNC370	19	41307067	41310149	-	19:41307067-41310149:-	HNRNPUL1	M1,M0,	M1,M0,M2,	M0,	Promoter,	1	3083	-	-	u	NONHSAG025849.1	NONHSAT066421.1	x	-	-	u
MN298573	LHRI_LNC1487.1	LHRI_LNC1487	9	33289162	33289397	+	9:33289162-33289397:+	NA	M0,M1,	M2,M1,M0,	M1,M0,	Promoter,	1	236	lnc-BAG1-2	lnc-BAG1-2:10	i	NONHSAG052019.1	NONHSAT130712.1	i	-	-	u
MN297808	LHRI_LNC650.1	LHRI_LNC650	20	35264349	35265432	-	20:35264349-35265432:-	MMP24	NA	M0,M1,M2,	NA	Promoter Flanking Region,CTCF Binding Site,	1	1084	lnc-MMP24OS-73	lnc-MMP24OS-73:9	i	NONHSAG031666.2	NONHSAT079476.2	i	-	-	u
MN297388	LHRI_LNC143.1	LHRI_LNC143	16	73059634	73060111	+	16:73059634-73060111:+	ZFHX3	M1,M0,	NA	M1,M0,	Promoter Flanking Region,Promoter,	1	478	lnc-DHX38-40	lnc-DHX38-40:1	o	NONHSAG019950.2	NONHSAT143627.2	o	-	-	u
MN297730	LHRI_LNC549.2	LHRI_LNC549	2	159670712	159712419	-	2:159670712-159712419:-	AC009961.1	M0,M1,	M0,M1,M2,	M1,M0,	Promoter,	3	383	lnc-BAZ2B-1	lnc-BAZ2B-1:7	j	NONHSAG029635.2	NONHSAT185741.1	j	AC009961.1	ENST00000607836.1	j	yes
MN297650	LHRI_LNC443.6	LHRI_LNC443	2	39437431	39485812	+	2:39437431-39485812:+	AC007388.1	M0,M1,	M2,M0,M1,	M1,M0,	Promoter,	5	2904	lnc-TMEM178A-1	lnc-TMEM178A-1:2	j	NONHSAG027544.2	NONHSAT070231.2	j	AC007388.1	ENST00000426083.5	j	yes
MK280382	LHRI_LNC105.1	LHRI_LNC105	16	29512518	29515776	-	16:29512518-29515776:-	NA	NA	M1,M0,M2,	NA	NA	1	3259	lnc-NPIPB12-1	lnc-NPIPB12-1:1	c	NONHSAG072092.1	NONHSAT173747.1	p	-	-	u
MN297529	LHRI_LNC283.9	LHRI_LNC283	18	5238128	5290168	+	18:5238128-5290168:+	LINC00667	M1,M0,	M1,	M0,	Promoter,	2	3768	LINC00667	LINC00667:11	j	NONHSAG023258.2	NONHSAT057067.2	j	LINC00667	ENST00000582008.5	j	Yes?
MN297708	LHRI_LNC520.20	LHRI_LNC520	2	113235693	113240825	+	2:113235693-113240825:+	PAX8-AS1	NA	M0,M1,M2,	M1,	Open chromatin,Promoter,	3	2781	PAX8-AS1	PAX8-AS1:37	j	NONHSAG029003.2	NONHSAT073765.2	j	PAX8-AS1	ENST00000333145.9	j	yes
MK280403	LHRI_LNC787.1	LHRI_LNC787	3	32570224	32578615	+	3:32570224-32578615:+	DYNC1LI1	M1,M0,	M1,M2,	M0,M1,	Promoter,	3	1199	lnc-CMTM7-2	lnc-CMTM7-2:2	o	NONHSAG034706.2	NONHSAT088885.2	j	-	-	u
MN298656	LHRI_LNC1567.1	LHRI_LNC1567	9	128683083	128684958	-	9:128683083-128684958:-	SET	M0,M1,	M2,M1,	M0,M1,	Open chromatin,	1	1876	-	-	u	-	-	u	-	-	u		Yes
MK280331	LHRI_LNC595.1	LHRI_LNC595	2	218215682	218217700	-	2:218215682-218217700:-	ARPC2	M0,M1,	M0,M1,M2,	M1,M2,M0,	Promoter,	1	2019	lnc-AAMP-2	lnc-AAMP-2:1	k	NONHSAG030516.2	NONHSAT076894.2	k	-	-	u
MN297984	LHRI_LNC802.7	LHRI_LNC802	3	45102229	45107947	+	3:45102229-45107947:+	CDCP1	NA	M0,M1,M2,	NA	Enhancer,TF binding site,	2	582	-	-	u	-	-	u	-	-	u		Yes
MN297736	LHRI_LNC556.1	LHRI_LNC556	2	177211307	177212478	-	2:177211307-177212478:-	AC079305.3	M1,M0,	M0,M1,M2,	M0,M2,M1,	Promoter,	1	1172	lnc-NFE2L2-1	lnc-NFE2L2-1:2	c	NONHSAG029926.2	NONHSAT075698.2	c	AC079305.3	ENST00000455416.1	i	yes
MN298075	LHRI_LNC916.1	LHRI_LNC916	4	133267	137631	+	4:133267-137631:+	ZNF718	NA	M2,M1,M0,	NA	NA	1	4365	-	-	u	NONHSAG037195.1	NONHSAT094509.1	i	-	-	u
MN297693	LHRI_LNC502.1	LHRI_LNC502	2	97165122	97165653	+	2:97165122-97165653:+	ANKRD36	NA	M0,M1,M2,	NA	NA	1	532	-	-	u	NONHSAG028612.1	NONHSAT072567.1	x	-	-	u
MN296868	LHRI_LNC639.1	LHRI_LNC639	1	149062947	149063622	-	1:149062947-149063622:-	NBPF9	NA	M0,M1,M2,	NA	NA	1	676	-	-	u	-	-	u	-	-	u		Yes
MN297713	LHRI_LNC525.1	LHRI_LNC525	2	113967784	113969626	+	2:113967784-113969626:+	NA	NA	M2,M0,M1,	NA	TF binding site,Enhancer,	1	1843	lnc-SLC35F5-4	lnc-SLC35F5-4:1	x	NONHSAG029003.1	NONHSAT073753.1	e	-	-	u
MN298381	LHRI_LNC1267.32	LHRI_LNC1267	7	30561562	30594743	-	7:30561562-30594743:-	AC005154.1	M1,M0,	M0,M1,M2,	M0,M1,	Promoter,	10	2075	lnc-GGCT-1	lnc-GGCT-1:31	j	NONHSAG047260.2	NONHSAT119880.2	j	GARS-DT	ENST00000426529.6	j	yes
MN298102	LHRI_LNC947.1	LHRI_LNC947	4	26319540	26320922	-	4:26319540-26320922:-	RBPJ	M1,M0,	NA	M1,M0,	Promoter,	1	1383	lnc-CCKAR-10	lnc-CCKAR-10:1	c	-	-	u	-	-	u
MN296788	LHRI_LNC1743.1	LHRI_LNC1743	1	16463811	16464455	+	1:16463811-16464455:+	LINC01772	NA	M0,M1,M2,	NA	Open chromatin,	1	645	lnc-SPATA21-4	lnc-SPATA21-4:9	x	NONHSAG000473.2	NONHSAT001116.2	i	LINC01772	ENST00000457898.1	i	yes
MN298601	LHRI_LNC1517.1	LHRI_LNC1517	9	66013370	66027719	-	9:66013370-66027719:-	GXYLT1P4	NA	M2,	NA	CTCF Binding Site,	6	3424	lnc-ANKRD20A3-52	lnc-ANKRD20A3-52:1	j	NONHSAG102020.1	NONHSAT220763.1	j	AL136317.2	ENST00000619851.1	j	yes
MN296798	LHRI_LNC1852.1	LHRI_LNC1852	1	25545314	25545552	+	1:25545314-25545552:+	LDLRAP1	M1,M0,	M1,M0,M2,	NA	Promoter,	1	239	-	-	u	-	-	u	-	-	u		Yes
MN298313	LHRI_LNC1194.2	LHRI_LNC1194	6	77259708	77273309	-	6:77259708-77273309:-	NA	NA	NA	NA	CTCF Binding Site,	3	507	lnc-HTR1B-1	lnc-HTR1B-1:3	j	NONHSAG094289.1	NONHSAT209333.1	j	-	-	u
MN297640	LHRI_LNC433.1	LHRI_LNC433	2	32916230	32916551	+	2:32916230-32916551:+	LINC00486	NA	M0,M1,M2,	NA	TF binding site,	2	270	LINC00486	LINC00486:21	i	NONHSAG078589.1	NONHSAT184447.1	x	LINC00486	ENST00000414054.5	i	yes
MN296864	LHRI_LNC544.1	LHRI_LNC544	1	146387217	146388222	+	1:146387217-146388222:+	AC245407.1	NA	NA	NA	Promoter Flanking Region,	1	1006	-	-	u	-	-	u	-	-	u		Yes
MN298133	LHRI_LNC987.1	LHRI_LNC987	4	137645175	137701007	-	4:137645175-137701007:-	AC131956.2	NA	M0,	NA	CTCF Binding Site,	4	695	lnc-PCDH18-1	lnc-PCDH18-1:3	j	NONHSAG038921.2	NONHSAT098403.2	j	AC131956.2	ENST00000510922.1	j	yes
MN297337	LHRI_LNC66.1	LHRI_LNC66	16	808382	808998	+	16:808382-808998:+	PRR25	M1,M0,	M1,M2,	M0,	Promoter Flanking Region,	1	617	-	-	u	-	-	u	-	-	u		Yes
MK280557	LHRI_LNC1311.6	LHRI_LNC1311	7	100336125	100351900	+	7:100336125-100351900:+	STAG3L5P-PVRIG2P-PILRB	M0,M1,	M1,M0,M2,	NA	Promoter,	6	1223	lnc-PILRB-1	lnc-PILRB-1:8	j	NONHSAG048354.2	NONHSAT147590.2	j	STAG3L5P-PVRIG2P-PILRB	ENST00000310771.8	j	yes
MN296926	LHRI_LNC1348.1	LHRI_LNC1348	1	212603968	212608312	-	1:212603968-212608312:-	ATF3	M0,M1,	M2,M1,M0,	M0,M1,M2,	Promoter,	1	4345	lnc-BATF3-8	lnc-BATF3-8:1	e	NONHSAG004230.1	NONHSAT009369.1	e	-	-	u
MN298537	LHRI_LNC1449.1	LHRI_LNC1449	8	131765975	131852647	-	8:131765975-131852647:-	NA	NA	NA	NA	Open chromatin,	2	4755	lnc-OC90-3	lnc-OC90-3:1	y	-	-	u	-	-	u
MN296801	LHRI_LNC1884.1	LHRI_LNC1884	1	26697555	26705178	+	1:26697555-26705178:+	ARID1A	M1,M0,	M0,M1,	M0,M1,	Promoter,	1	7624	-	-	u	NONHSAG056245.1	NONHSAT148574.1	i	-	-	u
MN297054	LHRI_LNC1835.1	LHRI_LNC1835	11	62790457	62791292	+	11:62790457-62791292:+	TMEM223	M0,M1,	M2,M1,M0,	NA	Promoter,	1	836	lnc-TMEM223-1	lnc-TMEM223-1:1	i	NONHSAG008544.2	NONHSAT159186.1	p	-	-	u
MN297089	LHRI_LNC1863.2	LHRI_LNC1863	11	72804041	72814628	-	11:72804041-72814628:-	ATG16L2	M0,M1,	M1,M0,M2,	M0,M1,	Promoter,	2	10268	lnc-STARD10-1	lnc-STARD10-1:5	k	NONHSAG009002.2	NONHSAT022801.2	k	AP002381.2	ENST00000624670.2	o	yes
MN298331	LHRI_LNC1214.2	LHRI_LNC1214	6	134398619	134406974	+	6:134398619-134406974:+	NA	NA	NA	M1,M0,	Enhancer,	3	547	lnc-SGK1-5	lnc-SGK1-5:4	i	NONHSAG093628.1	NONHSAT208060.1	j	-	-	u
MN297428	LHRI_LNC190.1	LHRI_LNC190	17	19685303	19685836	+	17:19685303-19685836:+	SLC47A2	NA	M0,M1,	NA	NA	1	534	-	-	u	-	-	u	-	-	u		Yes
MN298695	LHRI_LNC1639.1	LHRI_LNC1639	X	47925095	47925530	+	X:47925095-47925530:+	ZNF81	NA	NA	NA	NA	1	436	lnc-SPACA5-1	lnc-SPACA5-1:1	c	NONHSAG054399.2	NONHSAT136900.2	c	-	-	u
MN297153	LHRI_LNC1951.1	LHRI_LNC1951	12	49963751	49965861	-	12:49963751-49965861:-	AQP5	NA	NA	NA	Promoter,CTCF Binding Site,	2	1348	lnc-RACGAP1-3	lnc-RACGAP1-3:1	j	NONHSAG011122.2	NONHSAT028166.2	j	-	-	u
MN296823	LHRI_LNC213.4	LHRI_LNC213	1	87212705	87276798	+	1:87212705-87276798:+	AC099062.1,NA	NA	M1,M0,	NA	Open chromatin,	5	1250	lnc-LMO4-2	lnc-LMO4-2:18	j	-	-	u	AC099062.1	ENST00000640362.1	j	yes
MN297916	LHRI_LNC732.1	LHRI_LNC732	22	31489926	31491008	+	22:31489926-31491008:+	EIF4ENIF1	M0,M1,	M0,M1,M2,	M0,M1,	Promoter,	1	1083	lnc-LIMK2-5	lnc-LIMK2-5:2	c	-	-	u	-	-	u
MN296996	LHRI_LNC1762.1	LHRI_LNC1762	10	88582947	88583763	+	10:88582947-88583763:+	RNLS	NA	NA	NA	Promoter,	1	817	lnc-LIPJ-2	lnc-LIPJ-2:1	o	NONHSAG006467.2	NONHSAT015473.2	o	-	-	u
MK280043	LHRI_LNC1812.5	LHRI_LNC1812	11	21912432	21933768	+	11:21912432-21933768:+	NA,AC107882.1	NA	M0,	NA	NA	3	1838	-	-	u	-	-	u	-	-	u		Yes
MN298416	LHRI_LNC1296.4	LHRI_LNC1296	7	77421194	77425443	+	7:77421194-77425443:+	AC004921.1	NA	NA	M0,	Promoter Flanking Region,	5	725	lnc-CCDC146-96	lnc-CCDC146-96:4	j	NONHSAG096453.1	NONHSAT212270.1	j	AC004921.1	ENST00000608884.1	j	Yes?
MN297897	LHRI_LNC705.1	LHRI_LNC705	21	42843694	42847696	-	21:42843694-42847696:-	WDR4	NA	M2,M1,M0,	NA	NA	1	4003	lnc-CBS-2	lnc-CBS-2:1	k	NONHSAG032956.2	NONHSAT082353.2	k	-	-	u
MN297490	LHRI_LNC243.1	LHRI_LNC243	17	58289847	58290561	+	17:58289847-58290561:+	NA	NA	NA	NA	Promoter Flanking Region,	1	715	-	-	u	-	-	u	-	-	u		Yes
MN298161	LHRI_LNC1021.1	LHRI_LNC1021	5	14143273	14143628	+	5:14143273-14143628:+	NA	M0,M1,	NA	NA	Open chromatin,Promoter,CTCF Binding Site,	1	356	-	-	u	-	-	u	-	-	u		Yes
MN297355	LHRI_LNC92.5	LHRI_LNC92	16	21301016	21352138	+	16:21301016-21352138:+	CRYM-AS1	M1,M0,	M1,	NA	Promoter,	9	1242	lnc-ANKS4B-5	lnc-ANKS4B-5:10	j	NONHSAG018836.2	NONHSAT140971.2	j	-	-	u
MN297305	LHRI_LNC2130.1	LHRI_LNC2130	15	66842378	66852874	+	15:66842378-66852874:+	NA	NA	M1,M0,M2,	M1,M0,	Promoter Flanking Region,	2	9225	lnc-SMAD6-2	lnc-SMAD6-2:8	j	NONHSAG070400.1	NONHSAT170929.1	o	-	-	u
MK280252	LHRI_LNC272.2	LHRI_LNC272	17	80200673	80205476	-	17:80200673-80205476:-	AC087741.1	NA	M0,M1,M2,	NA	Promoter Flanking Region,	4	1607	lnc-SGSH-1	lnc-SGSH-1:2	j	NONHSAG022945.2	NONHSAT056356.2	j	AC087741.1	ENST00000576824.5	j	yes
MK280210	LHRI_LNC166.1	LHRI_LNC166	17	4987706	4990690	+	17:4987706-4990690:+	AC004771.3	M0,M1,	M2,M1,M0,	M0,	Promoter,	2	2891	-	-	u	NONHSAG020614.2	NONHSAT145148.2	o	AC004771.3	ENST00000574260.1	o	yes
MK280038	LHRI_LNC1812.3	LHRI_LNC1812	11	21912432	21935227	+	11:21912432-21935227:+	NA,AC107882.1	NA	M0,	NA	NA	2	3104	-	-	u	-	-	u	-	-	u		Yes
MN297125	LHRI_LNC1909.1	LHRI_LNC1909	12	6689821	6690127	+	12:6689821-6690127:+	NA	M1,M0,	M0,M1,M2,	M1,M0,	Open chromatin,Promoter,	1	307	-	-	u	NONHSAG010320.1	NONHSAT026117.1	x	-	-	u
MN297259	LHRI_LNC2073.1	LHRI_LNC2073	14	65056288	65060495	-	14:65056288-65060495:-	FNTB	NA	M0,M1,M2,	NA	NA	1	4208	-	-	u	NONHSAG015221.1	NONHSAT037345.1	i	-	-	u
MN298718	LHRI_LNC1677.5	LHRI_LNC1677	X	132277907	132283032	+	X:132277907-132283032:+	RAP2C-AS1	NA	NA	NA	NA	2	2275	RAP2C-AS1	RAP2C-AS1:12	i	NONHSAG103587.1	NONHSAT223030.1	k	RAP2C-AS1	ENST00000441399.2	i	Yes?
MK280239	LHRI_LNC300.4	LHRI_LNC300	18	76807478	76822298	-	18:76807478-76822298:-	AC027575.2,ZNF236-DT	M1,M0,	M2,M0,M1,	M0,M1,M2,	Promoter Flanking Region,Promoter,	4	2466	ZNF236-DT	ZNF236-DT:14	j	NONHSAG024210.2	NONHSAT178682.1	j	ZNF236-DT	ENST00000585258.1	j	yes
MN298389	LHRI_LNC1271.6	LHRI_LNC1271	7	38341615	38373576	+	7:38341615-38373576:+	TRG-AS1	NA	M1,M0,	NA	Promoter Flanking Region,CTCF Binding Site,	4	906	TRG-AS1	TRG-AS1:7	j	NONHSAG047376.2	NONHSAT120179.2	j	TRG-AS1	ENST00000629357.1	j	yes
MN297837	LHRI_LNC671.1	LHRI_LNC671	20	62594156	62603807	-	20:62594156-62603807:-	BX640514.2	NA	NA	M1,	Promoter Flanking Region,	3	3859	lnc-GATA5-5	lnc-GATA5-5:2	k	NONHSAG032242.2	NONHSAT189956.1	k	BX640514.2	ENST00000617730.1	k	yes
MK280392	LHRI_LNC753.5	LHRI_LNC753	22	45134363	45163659	-	22:45134363-45163659:-	NUP50-DT	M1,M0,	M1,M0,M2,	M0,	Promoter,	4	796	NUP50-DT	NUP50-DT:35	j	NONHSAG034128.2	NONHSAT192976.1	j	NUP50-DT	ENST00000426282.6	j	yes
MN298178	LHRI_LNC1040.1	LHRI_LNC1040	5	44823465	44825337	+	5:44823465-44825337:+	NA	NA	M2,M1,M0,	NA	NA	1	1873	lnc-MRPS30-8	lnc-MRPS30-8:3	c	NONHSAG040329.2	NONHSAT204123.1	i	-	-	u
MK280626	LHRI_LNC1522.1	LHRI_LNC1522	9	71203963	71204218	+	9:71203963-71204218:+	TRPM3	NA	NA	NA	CTCF Binding Site,	1	256	-	-	u	NONHSAG052499.1	NONHSAT131748.1	i	-	-	u
MK280121	LHRI_LNC1995.3	LHRI_LNC1995	12	111285258	111315134	-	12:111285258-111315134:-	CUX2	NA	M0,	M0,	Promoter Flanking Region,CTCF Binding Site,	4	876	lnc-FAM109A-3	lnc-FAM109A-3:1	j	-	-	u	-	-	u
MN298637	LHRI_LNC1543.1	LHRI_LNC1543	9	97575047	97575486	+	9:97575047-97575486:+	TMOD1	NA	M2,	NA	Promoter Flanking Region,	1	440	-	-	u	-	-	u	-	-	u		Yes
MN298141	LHRI_LNC996.1	LHRI_LNC996	4	153801054	153801313	-	4:153801054-153801313:-	NA	NA	M1,M2,	NA	Open chromatin,	1	260	-	-	u	NONHSAG039133.1	NONHSAT098818.1	i	-	-	u
MN298522	LHRI_LNC1430.1	LHRI_LNC1430	8	101120237	101126850	-	8:101120237-101126850:-	AP003469.2	NA	M1,	NA	Promoter,	3	3337	lnc-ZNF706-2	lnc-ZNF706-2:1	j	NONHSAG050909.2	NONHSAT128031.2	j	AP003469.2	ENST00000524369.1	j	yes
MN298308	LHRI_LNC1187.1	LHRI_LNC1187	6	53551927	53554346	+	6:53551927-53554346:+	GCLC	NA	NA	NA	Open chromatin,CTCF Binding Site,	1	2420	-	-	u	-	-	u	-	-	u		Yes
MN297085	LHRI_LNC1861.1	LHRI_LNC1861	11	72094975	72095450	-	11:72094975-72095450:-	LRTOMT	NA	M1,M0,M2,	NA	NA	1	476	-	-	u	-	-	u	-	-	u		Yes
MN297621	LHRI_LNC410.1	LHRI_LNC410	19	58303038	58303516	+	19:58303038-58303516:+	AC020915.5	M1,M0,	M2,M1,M0,	NA	Promoter,	1	479	lnc-ZNF8-2	lnc-ZNF8-2:2	c	NONHSAG076279.1	NONHSAT180001.1	p	-	-	u
MN297081	LHRI_LNC1856.1	LHRI_LNC1856	11	69047109	69049754	-	11:69047109-69049754:-	TPCN2	M1,M0,	M0,M1,M2,	M0,M1,	Promoter,	2	1896	-	-	u	NONHSAG062915.1	NONHSAT159324.1	x	-	-	u
MN297673	LHRI_LNC481.1	LHRI_LNC481	2	84967908	84970788	-	2:84967908-84970788:-	NA	M0,M1,	M1,	M0,M1,	Promoter,	1	2881	lnc-TRABD2A-5	lnc-TRABD2A-5:1	c	NONHSAG028363.2	NONHSAT071967.2	c	-	-	u
MN297765	LHRI_LNC588.1	LHRI_LNC588	2	216215605	216215971	+	2:216215605-216215971:+	NA	NA	M2,M0,M1,	NA	CTCF Binding Site,Promoter Flanking Region,	1	367	LINC01963	LINC01963:9	c	NONHSAG030469.2	NONHSAT076793.2	c	-	-	u
MK280606	LHRI_LNC1461.3	LHRI_LNC1461	8	143556831	143558354	-	8:143556831-143558354:-	GSDMD	M1,M0,	M1,M0,M2,	NA	Promoter,	2	1503	lnc-MROH6-1	lnc-MROH6-1:1	o	NONHSAG051497.2	NONHSAT129584.2	o	-	-	u
MN297975	LHRI_LNC798.1	LHRI_LNC798	3	44492443	44492947	-	3:44492443-44492947:-	NA	NA	M2,M1,M0,	NA	NA	1	505	lnc-ZKSCAN7-4	lnc-ZKSCAN7-4:3	i	-	-	u	-	-	u
MN298552	LHRI_LNC1466.1	LHRI_LNC1466	8	144507109	144508592	-	8:144507109-144508592:-	GPT	M0,M1,	M2,M1,M0,	M1,M0,	Promoter,	1	1484	lnc-RECQL4-3	lnc-RECQL4-3:1	e	NONHSAG051565.2	NONHSAT129779.2	e	-	-	u
MN297016	LHRI_LNC1789.1	LHRI_LNC1789	10	125518855	125519141	-	10:125518855-125519141:-	NA	NA	M2,	NA	CTCF Binding Site,	1	287	-	-	u	-	-	u	-	-	u		Yes
MN297919	LHRI_LNC739.1	LHRI_LNC739	22	37465110	37465811	-	22:37465110-37465811:-	NA	NA	M0,M2,	NA	Open chromatin,	1	702	lnc-MFNG-1	lnc-MFNG-1:1	c	NONHSAG033872.2	NONHSAT086599.2	c	-	-	u
MN297209	LHRI_LNC2027.1	LHRI_LNC2027	13	50715265	50775149	+	13:50715265-50775149:+	DLEU7,DLEU7-AS1	NA	NA	M0,	Promoter Flanking Region,Open chromatin,	4	1796	lnc-RNASEH2B-4	lnc-RNASEH2B-4:1	o	NONHSAG013534.2	NONHSAT165712.1	o	DLEU1	ENST00000470726.6	y	yes
MN297109	LHRI_LNC1890.1	LHRI_LNC1890	11	125624912	125625902	-	11:125624912-125625902:-	CHEK1	M0,M1,	M1,M0,M2,	NA	Promoter,	1	991	lnc-ACRV1-2	lnc-ACRV1-2:1	c	-	-	u	-	-	u
MN296991	LHRI_LNC1751.1	LHRI_LNC1751	10	80141822	80145504	-	10:80141822-80145504:-	PLAC9	NA	M0,M1,M2,	NA	CTCF Binding Site,Promoter Flanking Region,Open chromatin,	1	3683	lnc-ANXA11-1	lnc-ANXA11-1:1	e	NONHSAG006357.2	NONHSAT015230.2	e	-	-	u
MN298666	LHRI_LNC1575.1	LHRI_LNC1575	9	136119017	136120471	+	9:136119017-136120471:+	NA	M1,M0,	M2,M1,M0,	M0,M1,	Promoter,	1	1455	lnc-GPSM1-3	lnc-GPSM1-3:3	e	NONHSAG053787.2	NONHSAT135497.2	e	-	-	u
MN297510	LHRI_LNC267.1	LHRI_LNC267	17	76737595	76737889	-	17:76737595-76737889:-	MFSD11	M1,M0,	M0,M1,M2,	M0,M1,	Promoter,Promoter Flanking Region,	1	295	SNHG16	SNHG16:39	i	NONHSAG022835.2	NONHSAT175636.1	x	-	-	u
MN297720	LHRI_LNC536.1	LHRI_LNC536	2	142660580	142866093	-	2:142660580-142866093:-	AC013444.1,NA	NA	NA	M0,M1,	Promoter Flanking Region,	5	3286	lnc-LRP1B-4	lnc-LRP1B-4:8	j	NONHSAG079106.1	NONHSAT185596.1	k	-	-	u
MN297798	LHRI_LNC633.1	LHRI_LNC633	20	20249429	20250417	-	20:20249429-20250417:-	CFAP61	NA	M2,M1,M0,	NA	Open chromatin,	1	989	lnc-RALGAPA2-2	lnc-RALGAPA2-2:6	e	-	-	u	-	-	u
MN297588	LHRI_LNC363.2	LHRI_LNC363	19	37728779	37733334	-	19:37728779-37733334:-	AC093227.1	NA	M0,M1,M2,	NA	NA	1	4556	lnc-ZNF573-2	lnc-ZNF573-2:2	k	NONHSAG025705.2	NONHSAT066155.2	e	AC093227.1	ENST00000588040.1	e	yes
MN297597	LHRI_LNC377.1	LHRI_LNC377	19	44954602	44954998	-	19:44954602-44954998:-	CLPTM1	M1,M0,	M2,M0,M1,	M0,	Promoter,	1	397	-	-	u	-	-	u	-	-	u		Yes
MN298020	LHRI_LNC843.1	LHRI_LNC843	3	106272825	106274595	+	3:106272825-106274595:+	NA	NA	NA	NA	Open chromatin,	1	1771	lnc-ALCAM-8	lnc-ALCAM-8:7	c	NONHSAG084848.1	NONHSAT194267.1	c	-	-	u
MN297283	LHRI_LNC2106.1	LHRI_LNC2106	15	31321974	31326754	-	15:31321974-31326754:-	NA	M0,M1,	NA	M1,M0,	Promoter,	1	4781	lnc-OTUD7A-3	lnc-OTUD7A-3:1	e	NONHSAG016429.1	NONHSAT041421.1	i	-	-	u
MN298707	LHRI_LNC1660.1	LHRI_LNC1660	X	95971945	95972222	-	X:95971945-95972222:-	AL137845.2	NA	M2,M0,M1,	NA	NA	1	278	-	-	u	-	-	u	-	-	u		Yes
MK280571	LHRI_LNC1370.1	LHRI_LNC1370	8	303207	306873	-	8:303207-306873:-	NA	NA	M2,M1,M0,	NA	CTCF Binding Site,	4	808	lnc-OR4F21-5	lnc-OR4F21-5:1	j	NONHSAG049337.2	NONHSAT124584.2	j	-	-	u
MN296811	LHRI_LNC88.1	LHRI_LNC88	1	54643187	54643402	+	1:54643187-54643402:+	MROH7-TTC4	NA	M0,M1,	NA	CTCF Binding Site,	1	216	-	-	u	-	-	u	-	-	u		Yes
MN297080	LHRI_LNC1854.2	LHRI_LNC1854	11	69012618	69038002	+	11:69012618-69038002:+	MRGPRF	NA	M2,	NA	Promoter,	3	456	lnc-MRGPRF-7	lnc-MRGPRF-7:3	x	NONHSAG008874.2	NONHSAT159322.1	y	MRGPRF-AS1	ENST00000538407.2	y	yes
MN297470	LHRI_LNC217.26	LHRI_LNC217	17	43245621	43252019	-	17:43245621-43252019:-	RF00004	NA	NA	M1,M2,M0,	Promoter,	2	244	lnc-LINC00854-1	lnc-LINC00854-1:21	i	NONHSAG021878.2	NONHSAT053835.2	i	-	-	u
MN296821	LHRI_LNC213.1	LHRI_LNC213	1	87203044	87276981	+	1:87203044-87276981:+	AC099062.1,NA	NA	NA	NA	Promoter Flanking Region,	7	1954	lnc-LMO4-2	lnc-LMO4-2:18	j	NONHSAG001985.1	NONHSAT004274.1	y	AC099062.1	ENST00000640362.1	j	yes
MN298491	LHRI_LNC1390.4	LHRI_LNC1390	8	37326575	37331973	-	8:37326575-37331973:-	AC091182.1	NA	M2,	NA	Promoter Flanking Region,CTCF Binding Site,	3	3844	lnc-BRF2-9	lnc-BRF2-9:4	j	NONHSAG049977.2	NONHSAT126030.2	j	AC091182.1	ENST00000624599.1	j	yes
MN298646	LHRI_LNC1554.1	LHRI_LNC1554	9	112379253	112379849	-	9:112379253-112379849:-	NA	M0,M1,	NA	M0,	Promoter,	1	597	lnc-PTBP3-4	lnc-PTBP3-4:1	c	NONHSAG053216.2	NONHSAT134012.2	c	-	-	u
MN297511	LHRI_LNC268.1	LHRI_LNC268	17	76779655	76780214	+	17:76779655-76780214:+	MFSD11	NA	M1,M0,M2,	NA	NA	1	560	lnc-SRSF2-1	lnc-SRSF2-1:1	x	NONHSAG022836.2	NONHSAT056087.2	x	-	-	u
MN298073	LHRI_LNC914.1	LHRI_LNC914	3	198146585	198147946	+	3:198146585-198147946:+	NA	NA	NA	NA	CTCF Binding Site,TF binding site,Enhancer,Promoter Flanking Region,	1	1362	-	-	u	-	-	u	-	-	u		Yes
MN297438	LHRI_LNC195.1	LHRI_LNC195	17	31559234	31559433	+	17:31559234-31559433:+	NA	M1,M0,	NA	M1,M0,	Promoter,	1	200	-	-	u	NONHSAG021499.1	NONHSAT052979.1	i	-	-	u
MN298457	LHRI_LNC1352.1	LHRI_LNC1352	7	143375881	143381005	+	7:143375881-143381005:+	AC093673.1	NA	M2,	M0,	Promoter Flanking Region,Enhancer,CTCF Binding Site,	1	5125	lnc-EPHA1-1	lnc-EPHA1-1:3	x	NONHSAG049037.2	NONHSAT123868.2	x	AC093673.1	ENST00000429630.1	x	yes
MN297565	LHRI_LNC329.1	LHRI_LNC329	19	13151535	13151890	+	19:13151535-13151890:+	IER2	M0,M1,	M2,M0,	M1,M0,	Promoter,	1	356	-	-	u	-	-	u	-	-	u		Yes
MN298027	LHRI_LNC851.1	LHRI_LNC851	3	120097346	120097763	+	3:120097346-120097763:+	AC092910.3	M1,M0,	M2,M0,M1,	M0,M2,M1,	Promoter,	1	418	lnc-NR1I2-1	lnc-NR1I2-1:16	c	NONHSAG035860.2	NONHSAT091417.2	c	AC092910.3	ENST00000484076.1	i	yes
MN296986	LHRI_LNC1741.1	LHRI_LNC1741	10	73670462	73672217	-	10:73670462-73672217:-	AC073389.2	NA	M2,M1,M0,	NA	Promoter Flanking Region,	1	1756	lnc-AGAP5-1	lnc-AGAP5-1:25	c	NONHSAG006212.2	NONHSAT013995.2	i	AC073389.2	ENST00000607450.1	i	Yes?
MN298098	LHRI_LNC943.1	LHRI_LNC943	4	16229430	16231017	+	4:16229430-16231017:+	TAPT1-AS1	M1,M0,	NA	M0,	Promoter Flanking Region,Promoter,	1	1588	TAPT1-AS1	TAPT1-AS1:13	c	NONHSAG037561.1	NONHSAT095673.1	o	TAPT1-AS1	ENST00000573950.5	i	yes
MK280548	LHRI_LNC1292.1	LHRI_LNC1292	7	73285923	73286437	-	7:73285923-73286437:-	NA	NA	M2,M0,M1,	NA	CTCF Binding Site,	1	515	-	-	u	-	-	u	-	-	u		Yes
MK280347	LHRI_LNC656.12	LHRI_LNC656	20	40696499	40889433	-	20:40696499-40889433:-	AL035665.1,RNA5SP484,NA	NA	NA	NA	Promoter Flanking Region,	5	2272	lnc-MAFB-1	lnc-MAFB-1:1	j	NONHSAG031780.2	NONHSAT079742.2	j	AL035665.1	ENST00000428495.2	j	yes
MN298317	LHRI_LNC1199.1	LHRI_LNC1199	6	81843778	82095269	-	6:81843778-82095269:-	LINC02542	NA	NA	NA	CTCF Binding Site,	3	2259	LINC02542	LINC02542:7	j	NONHSAG044227.2	NONHSAT113750.2	j	LINC02542	ENST00000418567.1	j	Yes?
MN296937	LHRI_LNC1453.1	LHRI_LNC1453	1	228077016	228082535	-	1:228077016-228082535:-	NA	M0,M1,	M2,M0,M1,	M0,M2,M1,	Promoter,	1	5520	lnc-ARF1-2	lnc-ARF1-2:1	x	NONHSAG004516.2	NONHSAT009956.2	x	-	-	u
MN297291	LHRI_LNC2113.1	LHRI_LNC2113	15	40032833	40035470	-	15:40032833-40035470:-	EIF2AK4	NA	M1,M0,M2,	NA	NA	1	2638	lnc-BMF-3	lnc-BMF-3:2	p	NONHSAG016565.1	NONHSAT041767.1	e	-	-	u
MN296795	LHRI_LNC1800.1	LHRI_LNC1800	1	21423145	21425506	-	1:21423145-21425506:-	NBPF2P	NA	M0,M1,M2,	NA	NA	2	1758	lnc-ECE1-2	lnc-ECE1-2:2	o	NONHSAG000601.2	NONHSAT001411.2	o	-	-	u
MN298597	LHRI_LNC1515.1	LHRI_LNC1515	9	64448644	64469263	+	9:64448644-64469263:+	CYP4F25P	NA	M2,	NA	NA	2	476	lnc-ANKRD20A4-2	lnc-ANKRD20A4-2:1	y	NONHSAG052290.2	NONHSAT131335.2	j	-	-	u
MN297676	LHRI_LNC485.1	LHRI_LNC485	2	85546717	85547440	+	2:85546717-85547440:+	GGCX	NA	M2,M0,M1,	NA	Open chromatin,	1	724	-	-	u	NONHSAG028372.1	NONHSAT071983.1	p	-	-	u
MK280206	LHRI_LNC147.13	LHRI_LNC147	16	74359379	74368148	-	16:74359379-74368148:-	AC009053.1	M2,M0,M1,	M2,M1,M0,	M1,M0,	Open chromatin,Promoter,	3	4648	lnc-CLEC18B-2	lnc-CLEC18B-2:6	o	NONHSAG019971.2	NONHSAT143680.2	o	AC009053.2	ENST00000563701.1	x	yes
MN298176	LHRI_LNC1035.1	LHRI_LNC1035	5	42992270	42993449	+	5:42992270-42993449:+	NA	M1,M0,	NA	M0,M1,	Promoter Flanking Region,	1	1180	lnc-ANXA2R-1	lnc-ANXA2R-1:5	x	NONHSAG040295.2	NONHSAT202543.1	e	-	-	u
MK280304	LHRI_LNC289.8	LHRI_LNC289	1	14456	199841	-	1:14456-199841:-	MIR6859-1,MIR6859-2	M2,M1,M0,	M2,M1,M0,	M1,M2,M0,	Promoter,Open chromatin,	9	12659	lnc-OR4F29-11	lnc-OR4F29-11:4	j	NONHSAG000002.2	NONHSAT000009.2	j	MIR1302-2HG	ENST00000473358.1	x	yes
MN298025	LHRI_LNC850.1	LHRI_LNC850	3	119437232	119437840	+	3:119437232-119437840:+	TMEM39A	NA	M0,M1,M2,	NA	NA	1	609	-	-	u	-	-	u	-	-	u		Yes
MN296730	LHRI_LNC1585.1	LHRI_LNC1585	GL000195.1	138001	140477	+	GL000195.1:138001-140477:+	NA	NA	NA	NA	CTCF Binding Site,Promoter Flanking Region,	2	204	-	-	u	-	-	u	-	-	u		Yes
MN296953	LHRI_LNC1696.1	LHRI_LNC1696	10	8367058	8367319	-	10:8367058-8367319:-	NA	NA	NA	NA	Enhancer,Open chromatin,	1	262	-	-	u	-	-	u	-	-	u		Yes
MN297779	LHRI_LNC612.1	LHRI_LNC612	20	1800057	1800871	-	20:1800057-1800871:-	NA	M0,	NA	M0,M1,	Promoter Flanking Region,CTCF Binding Site,	1	815	lnc-PDYN-1	lnc-PDYN-1:13	c	NONHSAG031114.2	NONHSAT189201.1	i	-	-	u
MN298669	LHRI_LNC1579.1	LHRI_LNC1579	9	136807437	136807814	-	9:136807437-136807814:-	CCDC183	M1,M0,	M1,M0,M2,	NA	Promoter,	1	378	CCDC183-AS1	CCDC183-AS1:8	c	NONHSAG053813.2	NONHSAT221496.1	o	AL355987.4	ENST00000415992.5	x	yes
MN297099	LHRI_LNC1877.1	LHRI_LNC1877	11	106003213	106006701	-	11:106003213-106006701:-	MSANTD4	NA	M0,M1,M2,	NA	NA	1	3489	lnc-MSANTD4-1	lnc-MSANTD4-1:1	i	-	-	u	-	-	u
MN298056	LHRI_LNC890.1	LHRI_LNC890	3	160570831	160571065	+	3:160570831-160571065:+	KRT8P12	NA	M2,M0,M1,	NA	NA	1	235	lnc-ARL14-2	lnc-ARL14-2:3	p	-	-	u	-	-	u
MN298503	LHRI_LNC1405.1	LHRI_LNC1405	8	66668755	66675461	+	8:66668755-66675461:+	SGK3	M0,M1,	M0,	M1,M0,	Promoter Flanking Region,Promoter,	1	6707	-	-	u	NONHSAG050401.1	NONHSAT126997.1	x	-	-	u
MN298377	LHRI_LNC1256.1	LHRI_LNC1256	7	4583324	4590898	-	7:4583324-4590898:-	NA	NA	NA	NA	CTCF Binding Site,	2	241	-	-	u	-	-	u	-	-	u		Yes
MN298088	LHRI_LNC932.1	LHRI_LNC932	4	3384400	3385890	-	4:3384400-3385890:-	RGS12	M0,	M2,	M1,M0,	Promoter Flanking Region,	1	1491	-	-	u	-	-	u	-	-	u		Yes
MN298464	LHRI_LNC1363.1	LHRI_LNC1363	7	150572640	150572986	-	7:150572640-150572986:-	GIMAP4	NA	M2,M1,M0,	NA	NA	1	347	-	-	u	-	-	u	-	-	u		Yes
MN297173	LHRI_LNC1976.2	LHRI_LNC1976	12	89012268	89052265	-	12:89012268-89052265:-	AC024909.1	NA	M2,	NA	CTCF Binding Site,Open chromatin,	7	1929	LINC02458	LINC02458:11	j	NONHSAG011861.2	NONHSAT029802.2	j	AC024909.1	ENST00000549278.1	j	Yes?
MN298496	LHRI_LNC1397.3	LHRI_LNC1397	8	54162025	54381677	+	8:54162025-54381677:+	AC060764.1,NA	NA	NA	NA	NA	6	1516	lnc-SOX17-1	lnc-SOX17-1:2	j	NONHSAG050248.2	NONHSAT126632.2	j	-	-	u
MN296819	LHRI_LNC130.1	LHRI_LNC130	1	65054788	65057692	-	1:65054788-65057692:-	MIR3671	NA	M1,M0,M2,	NA	Promoter Flanking Region,Open chromatin,CTCF Binding Site,	1	2905	lnc-AK4-1	lnc-AK4-1:1	i	NONHSAG056517.1	NONHSAT149098.1	i	-	-	u
MN297555	LHRI_LNC318.1	LHRI_LNC318	19	7643347	7644147	+	19:7643347-7644147:+	STXBP2	NA	M2,M0,M1,	NA	Promoter Flanking Region,	2	528	-	-	u	-	-	u	-	-	u		Yes
MN297776	LHRI_LNC609.1	LHRI_LNC609	2	238328946	238329297	-	2:238328946-238329297:-	TRAF3IP1	NA	M1,M0,M2,	NA	Open chromatin,	1	352	-	-	u	-	-	u	-	-	u		Yes
MN297206	LHRI_LNC2020.1	LHRI_LNC2020	13	44917728	44917997	-	13:44917728-44917997:-	NA	M0,	NA	NA	Promoter Flanking Region,	1	270	-	-	u	NONHSAG067507.1	NONHSAT166710.1	e	-	-	u
MN297549	LHRI_LNC309.1	LHRI_LNC309	19	2292624	2293247	+	19:2292624-2293247:+	AC005258.1	M0,M1,	M2,	M0,	Promoter,Promoter Flanking Region,Open chromatin,	1	624	-	-	u	-	-	u	-	-	u		Yes
MN298411	LHRI_LNC1293.1	LHRI_LNC1293	7	74879166	74879590	-	7:74879166-74879590:-	NA	NA	M1,M0,M2,	NA	NA	1	425	lnc-GTF2IRD2-5	lnc-GTF2IRD2-5:1	p	-	-	u	-	-	u
MN297432	LHRI_LNC198.2	LHRI_LNC198	17	30709608	30787754	+	17:30709608-30787754:+	SUZ12P1	M0,M1,	NA	NA	Promoter,	10	1271	lnc-ATAD5-9	lnc-ATAD5-9:8	j	NONHSAG021408.2	NONHSAT052812.2	j	AC127024.3	ENST00000582841.1	x	yes
MN298614	LHRI_LNC1523.11	LHRI_LNC1523	9	72260386	72291846	-	9:72260386-72291846:-	GDA,AL135924.1,NA	NA	M2,M0,	M0,	Promoter Flanking Region,CTCF Binding Site,	3	883	lnc-GDA-3	lnc-GDA-3:1	x	NONHSAG052553.2	NONHSAT131854.2	x	-	-	u
MN297792	LHRI_LNC630.4	LHRI_LNC630	20	17658706	17659949	+	20:17658706-17659949:+	RRBP1	NA	M1,M0,M2,	NA	Open chromatin,Promoter Flanking Region,	3	824	lnc-BFSP1-4	lnc-BFSP1-4:1	x	NONHSAG031342.2	NONHSAT189382.1	x	-	-	u
MN298430	LHRI_LNC1323.2	LHRI_LNC1323	7	102688881	102689626	+	7:102688881-102689626:+	AC105052.1,RASA4DP	NA	M2,M0,M1,	NA	Promoter,	2	552	lnc-POLR2J2-32	lnc-POLR2J2-32:1	x	NONHSAG048431.2	NONHSAT147592.2	x	-	-	u
MN298579	LHRI_LNC1493.1	LHRI_LNC1493	9	37507186	37510404	+	9:37507186-37510404:+	AL513165.1	NA	M0,M1,M2,	NA	TF binding site,	1	3219	lnc-POLR1E-2	lnc-POLR1E-2:3	c	NONHSAG052172.2	NONHSAT131072.2	c	AL513165.1	ENST00000413915.1	e	yes
MN297121	LHRI_LNC1907.1	LHRI_LNC1907	12	6160311	6161659	+	12:6160311-6161659:+	AC005845.1	NA	NA	NA	Enhancer,Open chromatin,	1	1349	lnc-VWF-2	lnc-VWF-2:10	x	NONHSAG010278.2	NONHSAT026024.2	x	AC005845.1	ENST00000539206.1	x	yes
MN298118	LHRI_LNC966.1	LHRI_LNC966	4	78645903	78682392	+	4:78645903-78682392:+	LINC01094	NA	NA	M0,M1,	Promoter Flanking Region,CTCF Binding Site,	5	1775	LINC01094	LINC01094:27	j	NONHSAG038283.2	NONHSAT097072.2	j	LINC01094	ENST00000504675.5	j	Yes?
MN297401	LHRI_LNC157.1	LHRI_LNC157	16	88679621	88682966	+	16:88679621-88682966:+	SNAI3	NA	M0,M1,M2,	M0,	Promoter Flanking Region,CTCF Binding Site,	1	3346	SNAI3-AS1	SNAI3-AS1:1	i	NONHSAG020287.1	NONHSAT144389.1	i	SNAI3-AS1	ENST00000563261.5	i	Yes?
MK280075	LHRI_LNC1880.1	LHRI_LNC1880	11	108008592	108009451	-	11:108008592-108009451:-	CUL5	M0,M1,	M0,	M0,M1,	Promoter,	1	860	-	-	u	NONHSAG009537.2	NONHSAT159621.1	x	-	-	u
MK280179	LHRI_LNC521.1	LHRI_LNC521	2	113599032	113600510	-	2:113599032-113600510:-	DDX11L2	NA	M2,M1,M0,	NA	NA	1	1479	lnc-SLC35F5-16	lnc-SLC35F5-16:1	c	NONHSAG029022.2	NONHSAT073809.2	c	-	-	u
MN297315	LHRI_LNC50.1	LHRI_LNC50	15	77380426	77388750	-	15:77380426-77388750:-	PEAK1	NA	NA	NA	NA	2	214	lnc-PEAK1-1	lnc-PEAK1-1:18	i	NONHSAG017519.2	NONHSAT171802.1	o	-	-	u
MK280389	LHRI_LNC748.2	LHRI_LNC748	22	42438023	42450800	+	22:42438023-42450800:+	AL022316.1	NA	M2,	NA	Promoter,Promoter Flanking Region,	6	1170	lnc-SERHL2-2	lnc-SERHL2-2:2	j	NONHSAG034056.2	NONHSAT087053.2	j	AL022316.1	ENST00000428765.1	k	yes
MN297692	LHRI_LNC501.1	LHRI_LNC501	2	97162352	97162972	+	2:97162352-97162972:+	ANKRD36	NA	M2,M0,M1,	NA	NA	1	621	-	-	u	-	-	u	-	-	u		Yes
MN298665	LHRI_LNC1574.1	LHRI_LNC1574	9	136117771	136118367	+	9:136117771-136118367:+	TMEM250	M0,M1,	M2,M0,M1,	M1,M0,	Promoter,	1	597	lnc-TMEM250-1	lnc-TMEM250-1:5	i	NONHSAG053785.2	NONHSAT135491.2	i	-	-	u
MK280083	LHRI_LNC1893.2	LHRI_LNC1893	11	128691672	128696023	-	11:128691672-128696023:-	SENCR	M0,M1,	M2,M1,M0,	M0,M2,M1,	Promoter,	2	561	SENCR	SENCR:2	j	NONHSAG010021.2	NONHSAT025072.2	j	SENCR	ENST00000526269.2	j	yes
MN297564	LHRI_LNC328.1	LHRI_LNC328	19	12575834	12576803	-	19:12575834-12576803:-	AC010422.6	NA	M0,M1,M2,	NA	NA	1	970	-	-	u	NONHSAG024876.1	NONHSAT061249.1	e	-	-	u
MN298497	LHRI_LNC1397.4	LHRI_LNC1397	8	54162056	54208117	+	8:54162056-54208117:+	AC060764.1,NA	NA	NA	NA	NA	3	492	lnc-LYPLA1-4	lnc-LYPLA1-4:1	x	NONHSAG099451.1	NONHSAT217044.1	x	-	-	u
MK280577	LHRI_LNC1383.2	LHRI_LNC1383	8	23225221	23230926	+	8:23225221-23230926:+	AC100861.1	M0,M1,	M0,M1,	NA	Promoter,Promoter Flanking Region,	4	1791	lnc-CHMP7-1	lnc-CHMP7-1:11	j	NONHSAG049754.2	NONHSAT125546.2	j	AC100861.1	ENST00000500853.1	j	yes
MN297052	LHRI_LNC1832.1	LHRI_LNC1832	11	62574158	62576190	+	11:62574158-62576190:+	TUT1	M0,M1,	M2,M0,M1,	NA	Promoter,	1	2033	lnc-TUT1-1	lnc-TUT1-1:2	x	NONHSAG062841.1	NONHSAT159180.1	e	-	-	u
MN298679	LHRI_LNC1615.1	LHRI_LNC1615	X	1601197	1601576	-	X:1601197-1601576:-	AKAP17A	NA	M2,M0,M1,	NA	NA	1	380	-	-	u	NONHSAG053921.1	NONHSAT136063.1	i	-	-	u
MN296888	LHRI_LNC888.2	LHRI_LNC888	1	160284375	160291307	+	1:160284375-160291307:+	PEX19	M0,M1,	M2,M0,M1,	M0,M1,	Promoter,	3	577	lnc-NCSTN-3	lnc-NCSTN-3:1	j	NONHSAG056907.1	NONHSAT149936.1	y	-	-	u
MN298526	LHRI_LNC1434.6	LHRI_LNC1434	8	103080256	103140606	+	8:103080256-103140606:+	LINC01181	NA	NA	M0,M1,	Promoter Flanking Region,	6	2775	LINC01181	LINC01181:3	j	NONHSAG050978.2	NONHSAT128155.2	j	LINC01181	ENST00000503718.2	j	yes
MK280168	LHRI_LNC51.1	LHRI_LNC51	15	78753952	78754684	+	15:78753952-78754684:+	AC022748.1	NA	M1,M0,M2,	NA	CTCF Binding Site,Promoter Flanking Region,	1	733	lnc-MORF4L1-1	lnc-MORF4L1-1:1	p	NONHSAG017562.1	NONHSAT047565.1	i	-	-	u
MN297280	LHRI_LNC2104.1	LHRI_LNC2104	15	30614414	30625756	-	15:30614414-30625756:-	AC091057.2	M1,M0,	M2,M0,M1,	M1,M0,	Promoter,	2	833	lnc-GOLGA8R-1	lnc-GOLGA8R-1:2	j	NONHSAG016417.2	NONHSAT171399.1	j	AC091057.2	ENST00000501830.2	j	yes
MN298419	LHRI_LNC1304.1	LHRI_LNC1304	7	92495157	92495569	+	7:92495157-92495569:+	PEX1	NA	M2,M0,M1,	NA	NA	1	413	-	-	u	NONHSAG048211.1	NONHSAT121996.1	i	-	-	u
MN297262	LHRI_LNC2075.1	LHRI_LNC2075	14	70798499	70798778	+	14:70798499-70798778:+	MAP3K9	NA	NA	NA	NA	1	280	-	-	u	-	-	u	-	-	u		Yes
MN297839	LHRI_LNC673.1	LHRI_LNC673	20	62879241	62879671	+	20:62879241-62879671:+	DIDO1	NA	M0,M1,M2,	NA	Promoter Flanking Region,TF binding site,	1	431	-	-	u	-	-	u	-	-	u		Yes
MK280460	LHRI_LNC327.1	LHRI_LNC327	19	12192402	12193382	+	19:12192402-12193382:+	NA	NA	M0,M1,M2,	NA	CTCF Binding Site,Promoter,	1	981	lnc-ZNF44-2	lnc-ZNF44-2:1	x	NONHSAG024869.2	NONHSAT061230.2	x	-	-	u
MN297997	LHRI_LNC820.1	LHRI_LNC820	3	52241308	52245675	-	3:52241308-52245675:-	NA,PPM1M	M0,M1,	M2,M1,M0,	M0,M1,	CTCF Binding Site,Promoter,	2	656	lnc-PPM1M-2	lnc-PPM1M-2:5	x	NONHSAG035159.2	NONHSAT089903.2	x	-	-	u
MN297219	LHRI_LNC2037.1	LHRI_LNC2037	13	109731764	109732144	-	13:109731764-109732144:-	NA	NA	NA	NA	CTCF Binding Site,Promoter Flanking Region,	1	381	lnc-IRS2-1	lnc-IRS2-1:5	c	-	-	u	-	-	u
MN297586	LHRI_LNC360.1	LHRI_LNC360	19	35317744	35318343	+	19:35317744-35318343:+	NA	NA	NA	M0,	Promoter Flanking Region,TF binding site,	1	600	-	-	u	NONHSAG025535.1	NONHSAT065045.1	i	-	-	u
MN297282	LHRI_LNC2098.1	LHRI_LNC2098	15	31215706	31219493	+	15:31215706-31219493:+	LINC02352	M0,	NA	M1,M0,	Promoter,Enhancer,	3	679	LINC02352	LINC02352:13	j	NONHSAG016430.2	NONHSAT041425.2	j	LINC02352	ENST00000559292.2	j	yes
MN297503	LHRI_LNC259.1	LHRI_LNC259	17	68534626	68535030	+	17:68534626-68535030:+	PRKAR1A	NA	M2,M0,M1,	NA	Open chromatin,	1	405	lnc-ARSG-2	lnc-ARSG-2:8	p	NONHSAG022598.2	NONHSAT055541.2	p	-	-	u
MN298532	LHRI_LNC1443.1	LHRI_LNC1443	8	124492115	124492663	+	8:124492115-124492663:+	TATDN1	NA	M2,M1,M0,	NA	Open chromatin,	1	549	lnc-MTSS1-5	lnc-MTSS1-5:1	i	NONHSAG051197.2	NONHSAT128590.2	p	AC090198.1	ENST00000518639.1	p	yes
MK280425	LHRI_LNC872.1	LHRI_LNC872	3	143178444	143178817	+	3:143178444-143178817:+	PBX2P1	NA	M2,M1,M0,	NA	Promoter,Promoter Flanking Region,	1	374	-	-	u	NONHSAG085018.1	NONHSAT194585.1	e	-	-	u
MN296921	LHRI_LNC1314.1	LHRI_LNC1314	1	211309464	211310420	+	1:211309464-211310420:+	RCOR3	NA	M1,M0,M2,	NA	NA	1	957	-	-	u	-	-	u	-	-	u		Yes
MN298445	LHRI_LNC1338.1	LHRI_LNC1338	7	130983529	130983937	-	7:130983529-130983937:-	AC016831.7	NA	M1,M0,M2,	NA	Enhancer,	1	409	LINC-PINT	LINC-PINT:39	c	NONHSAG048820.2	NONHSAT213993.1	o	AC016831.6	ENST00000644432.1	i	yes
MN297061	LHRI_LNC1842.1	LHRI_LNC1842	11	65422356	65444557	+	11:65422356-65444557:+	RF01957,RF01956	M1,M0,	M0,M1,M2,	M1,M0,	Promoter,	7	18526	NEAT1	NEAT1:18	k	NONHSAG008695.1	NONHSAT022201.1	k	NEAT1	ENST00000646243.1	j	yes
MN298520	LHRI_LNC1427.1	LHRI_LNC1427	8	96493937	96494149	-	8:96493937-96494149:-	SDC2	M1,M0,	NA	NA	Promoter,	1	213	lnc-CPQ-1	lnc-CPQ-1:1	x	NONHSAG050809.1	NONHSAT127836.1	i	-	-	u
MN298514	LHRI_LNC1420.1	LHRI_LNC1420	8	81288912	81289446	+	8:81288912-81289446:+	NA	NA	M1,M2,	NA	Enhancer,	1	535	-	-	u	-	-	u	-	-	u		Yes
MN298015	LHRI_LNC839.1	LHRI_LNC839	3	101688821	101689657	+	3:101688821-101689657:+	NA	M0,M1,	NA	NA	Open chromatin,Promoter,	1	837	lnc-CEP97-8	lnc-CEP97-8:1	c	NONHSAG035615.2	NONHSAT090907.2	c	-	-	u
MN297090	LHRI_LNC1864.1	LHRI_LNC1864	11	73408920	73409460	+	11:73408920-73409460:+	FAM168A	NA	M0,M1,M2,	NA	NA	1	541	lnc-RELT-1	lnc-RELT-1:1	i	NONHSAG009022.2	NONHSAT022836.2	i	AP000763.3	ENST00000542598.5	i	yes
MK280184	LHRI_LNC77.1	LHRI_LNC77	16	2965347	2967052	-	16:2965347-2967052:-	KREMEN2	M1,M0,	M2,	NA	Promoter,	1	1706	lnc-PKMYT1-2	lnc-PKMYT1-2:1	p	NONHSAG071969.1	NONHSAT173535.1	e	-	-	u
MN298458	LHRI_LNC1354.1	LHRI_LNC1354	7	143392142	143392664	+	7:143392142-143392664:+	EPHA1	NA	M0,M1,M2,	NA	Promoter Flanking Region,TF binding site,Open chromatin,	1	523	-	-	u	-	-	u	-	-	u		Yes
MN297653	LHRI_LNC446.1	LHRI_LNC446	2	42810516	42811262	-	2:42810516-42811262:-	NA	NA	NA	M0,M1,	Promoter Flanking Region,CTCF Binding Site,	1	747	lnc-HAAO-1	lnc-HAAO-1:1	e	NONHSAG027588.2	NONHSAT070352.2	e	-	-	u
MN297098	LHRI_LNC1876.1	LHRI_LNC1876	11	105998730	106002189	-	11:105998730-106002189:-	MSANTD4	NA	M2,M0,M1,	NA	CTCF Binding Site,	1	3460	lnc-MSANTD4-1	lnc-MSANTD4-1:1	i	NONHSAG009522.1	NONHSAT023975.1	i	AP000813.1	ENST00000649670.1	x	yes
MN298684	LHRI_LNC1622.1	LHRI_LNC1622	X	23836644	23837321	-	X:23836644-23837321:-	RPL9P7	NA	M2,M1,M0,	NA	Promoter,	2	583	lnc-ACOT9-3	lnc-ACOT9-3:2	i	-	-	u	-	-	u
MN297550	LHRI_LNC310.1	LHRI_LNC310	19	2293785	2294602	+	19:2293785-2294602:+	AC005258.1	NA	M2,	NA	Open chromatin,Promoter Flanking Region,	1	818	lnc-OAZ1-1	lnc-OAZ1-1:1	o	NONHSAG075923.1	NONHSAT179348.1	o	-	-	u
MN298136	LHRI_LNC991.1	LHRI_LNC991	4	141307398	141332618	-	4:141307398-141332618:-	LINC02432	NA	NA	NA	Promoter,Promoter Flanking Region,	7	1377	LINC02432	LINC02432:13	j	NONHSAG038978.2	NONHSAT200465.1	j	LINC02432	ENST00000511213.1	k	Yes?
MK280586	LHRI_LNC1406.1	LHRI_LNC1406	8	67434764	67435057	+	8:67434764-67435057:+	CPA6	NA	M1,M0,M2,	NA	NA	1	294	lnc-CSPP1-1	lnc-CSPP1-1:3	i	NONHSAG050432.2	NONHSAT215924.1	i	-	-	u
MN297195	LHRI_LNC1998.1	LHRI_LNC1998	12	118027759	118028479	-	12:118027759-118028479:-	RFC5	NA	M1,M0,M2,	NA	NA	1	721	lnc-WSB2-3	lnc-WSB2-3:1	i	NONHSAG065740.1	NONHSAT164065.1	i	-	-	u
MN297416	LHRI_LNC178.1	LHRI_LNC178	17	15976136	15976564	+	17:15976136-15976564:+	ZSWIM7	NA	M1,M0,M2,	NA	NA	1	429	lnc-ZSWIM7-2	lnc-ZSWIM7-2:2	x	NONHSAG020941.2	NONHSAT175978.1	i	-	-	u
MN297665	LHRI_LNC464.5	LHRI_LNC464	2	64757058	64863626	-	2:64757058-64863626:-	LINC01800	NA	NA	M0,M1,	NA	4	1064	lnc-SERTAD2-3	lnc-SERTAD2-3:4	j	NONHSAG027974.2	NONHSAT071132.2	j	LINC01800	ENST00000445865.1	j	yes
MN297049	LHRI_LNC1829.1	LHRI_LNC1829	11	61969972	61970207	-	11:61969972-61970207:-	NA	M0,	NA	M0,M1,	Promoter,	1	236	-	-	u	NONHSAG008506.1	NONHSAT021737.1	i	-	-	u
MN297072	LHRI_LNC1845.1	LHRI_LNC1845	11	65614445	65614647	+	11:65614445-65614647:+	MAP3K11	M1,M0,	M1,M0,M2,	M0,	Promoter,	1	203	-	-	u	NONHSAG008705.1	NONHSAT022223.1	x	-	-	u
MN296860	LHRI_LNC456.1	LHRI_LNC456	1	120844117	120844325	-	1:120844117-120844325:-	NA	NA	M0,M1,M2,	NA	Promoter Flanking Region,	1	209	lnc-FAM72B-16	lnc-FAM72B-16:3	p	NONHSAG002605.1	NONHSAT005592.1	i	-	-	u
MN297574	LHRI_LNC342.1	LHRI_LNC342	19	18769769	18770005	+	19:18769769-18770005:+	CRTC1	NA	M2,M0,M1,	NA	Open chromatin,TF binding site,CTCF Binding Site,	1	237	-	-	u	NONHSAG025145.1	NONHSAT062991.1	c	-	-	u
MN298462	LHRI_LNC1359.1	LHRI_LNC1359	7	149187313	149187530	+	7:149187313-149187530:+	NA	NA	M2,	NA	NA	1	218	-	-	u	NONHSAG096761.1	NONHSAT212853.1	i	-	-	u
MN298383	LHRI_LNC1267.31	LHRI_LNC1267	7	30561562	30594760	-	7:30561562-30594760:-	AC005154.1	M0,M1,	M2,M0,M1,	M1,M0,	Promoter,	9	3748	lnc-GGCT-1	lnc-GGCT-1:31	j	NONHSAG047260.2	NONHSAT119880.2	j	GARS-DT	ENST00000426529.6	j	yes
MN298448	LHRI_LNC1341.1	LHRI_LNC1341	7	131103297	131105855	-	7:131103297-131105855:-	AC016831.7	M1,M0,	M2,M1,M0,	M0,	Promoter,	1	2559	LINC-PINT	LINC-PINT:18	c	NONHSAG048820.2	NONHSAT123398.2	c	AC016831.6	ENST00000644432.1	i	yes
MK280062	LHRI_LNC1844.1	LHRI_LNC1844	11	65575335	65575906	-	11:65575335-65575906:-	NA	M1,M0,	M1,M0,M2,	M0,M1,	Promoter,	1	572	-	-	u	NONHSAG008703.1	NONHSAT022219.1	i	-	-	u
MN297746	LHRI_LNC569.1	LHRI_LNC569	2	191588067	191597890	-	2:191588067-191597890:-	NA	NA	M0,M1,M2,	M1,	TF binding site,Promoter Flanking Region,	1	9824	-	-	u	-	-	u	-	-	u		Yes
MN296870	LHRI_LNC597.1	LHRI_LNC597	1	149621565	149621984	-	1:149621565-149621984:-	LINC00869	NA	M2,M1,	NA	Enhancer,Promoter Flanking Region,	1	420	lnc-PPIAL4C-4	lnc-PPIAL4C-4:16	i	NONHSAG002815.2	NONHSAT006228.2	e	-	-	u
MK280558	LHRI_LNC1311.7	LHRI_LNC1311	7	100336125	100351900	+	7:100336125-100351900:+	STAG3L5P-PVRIG2P-PILRB	M1,M0,	M1,M0,M2,	NA	Promoter,	6	1340	lnc-PILRB-1	lnc-PILRB-1:8	j	NONHSAG048354.2	NONHSAT147590.2	j	STAG3L5P-PVRIG2P-PILRB	ENST00000310771.8	j	yes
MN297771	LHRI_LNC602.1	LHRI_LNC602	2	231666682	231666915	+	2:231666682-231666915:+	NA	NA	M1,	M1,M0,	Promoter Flanking Region,	1	234	lnc-PTMA-5	lnc-PTMA-5:1	c	NONHSAG078250.1	NONHSAT183743.1	c	-	-	u
MN297471	LHRI_LNC218.1	LHRI_LNC218	17	43246595	43247008	+	17:43246595-43247008:+	LINC00854	M1,M0,M2,	M2,	M2,M1,M0,	Promoter,Promoter Flanking Region,	1	414	lnc-LINC00854-1	lnc-LINC00854-1:24	i	NONHSAG021878.2	NONHSAT053833.2	i	-	-	u
MN297257	LHRI_LNC2070.1	LHRI_LNC2070	14	64443614	64444011	-	14:64443614-64444011:-	MTHFD1	NA	M2,M1,M0,	NA	Enhancer,	1	398	lnc-ZBTB25-2	lnc-ZBTB25-2:1	i	NONHSAG015215.2	NONHSAT037335.2	i	AL122035.1	ENST00000556640.1	i	yes
MN297021	LHRI_LNC1794.1	LHRI_LNC1794	11	508932	509537	+	11:508932-509537:+	NA	M1,M0,	M1,M0,M2,	M0,M1,	Promoter,	1	606	lnc-LRRC56-1	lnc-LRRC56-1:7	c	NONHSAG007316.2	NONHSAT017262.2	c	-	-	u
MN296869	LHRI_LNC596.1	LHRI_LNC596	1	149619663	149620048	-	1:149619663-149620048:-	LINC00869	NA	M2,M1,	NA	Enhancer,Promoter Flanking Region,	1	386	lnc-PPIAL4C-4	lnc-PPIAL4C-4:16	i	NONHSAG002812.1	NONHSAT006218.1	i	-	-	u
MN298410	LHRI_LNC1291.1	LHRI_LNC1291	7	67266569	67274639	-	7:67266569-67274639:-	NA	NA	M0,M1,M2,	NA	CTCF Binding Site,	2	582	lnc-SBDS-28	lnc-SBDS-28:1	o	NONHSAG047867.2	NONHSAT121267.2	x	-	-	u
MN297162	LHRI_LNC1964.1	LHRI_LNC1964	12	62561619	62562509	+	12:62561619-62562509:+	MON2	NA	M2,M0,M1,	NA	Open chromatin,	1	891	-	-	u	NONHSAG011494.1	NONHSAT029069.1	i	-	-	u
MN297825	LHRI_LNC656.19	LHRI_LNC656	20	40744595	40889464	-	20:40744595-40889464:-	AL035665.1,RNA5SP484,NA	NA	NA	NA	Promoter Flanking Region,	3	3005	lnc-TOP1-6	lnc-TOP1-6:1	x	NONHSAG081962.1	NONHSAT189678.1	o	-	-	u
MN297540	LHRI_LNC297.1	LHRI_LNC297	18	62610675	62613670	+	18:62610675-62613670:+	NA	NA	NA	NA	Promoter Flanking Region,	1	2996	-	-	u	NONHSAG024068.1	NONHSAT059693.1	i	-	-	u
MK280681	LHRI_LNC1070.1	LHRI_LNC1070	5	95834746	95835274	+	5:95834746-95835274:+	AC008592.3	NA	NA	M0,M1,	Promoter,	1	529	lnc-GLRX-2	lnc-GLRX-2:2	x	NONHSAG041080.1	NONHSAT102893.1	c	-	-	u
MN297516	LHRI_LNC275.1	LHRI_LNC275	17	81828294	81833068	-	17:81828294-81833068:-	MCRIP1	M1,M0,	NA	M0,	Promoter,Enhancer,	1	4775	lnc-PPP1R27-2	lnc-PPP1R27-2:3	i	NONHSAG023026.2	NONHSAT056562.2	i	-	-	u
MN298507	LHRI_LNC1409.1	LHRI_LNC1409	8	70541937	70542725	+	8:70541937-70542725:+	NA	NA	NA	NA	Promoter Flanking Region,	1	789	-	-	u	-	-	u	-	-	u		Yes
MN297672	LHRI_LNC480.1	LHRI_LNC480	2	84963590	84963845	-	2:84963590-84963845:-	NA	NA	M2,M1,M0,	NA	Enhancer,	1	256	lnc-TRABD2A-5	lnc-TRABD2A-5:1	c	NONHSAG028362.2	NONHSAT071966.2	i	-	-	u
MN297088	LHRI_LNC1859.4	LHRI_LNC1859	11	72201884	72209241	-	11:72201884-72209241:-	AP000812.1	NA	M2,M0,M1,	NA	CTCF Binding Site,Promoter Flanking Region,	3	1957	lnc-PHOX2A-3	lnc-PHOX2A-3:1	j	NONHSAG008973.2	NONHSAT022760.2	j	AP000812.1	ENST00000378140.3	j	yes
MK280499	LHRI_LNC1198.1	LHRI_LNC1198	6	81813286	81814773	-	6:81813286-81814773:-	LINC01526	NA	NA	M0,	Enhancer,Promoter Flanking Region,	3	825	LINC01526	LINC01526:2	j	NONHSAG044226.2	NONHSAT113748.2	j	LINC01526	ENST00000441949.1	j	yes
MN297666	LHRI_LNC465.1	LHRI_LNC465	2	64925152	64926606	-	2:64925152-64926606:-	NA	NA	M2,M0,M1,	NA	CTCF Binding Site,Open chromatin,	1	1455	lnc-SERTAD2-3	lnc-SERTAD2-3:4	i	NONHSAG077413.1	NONHSAT181906.1	x	-	-	u
MN297573	LHRI_LNC340.1	LHRI_LNC340	19	18304493	18321917	+	19:18304493-18321917:+	LSM4	NA	M1,M0,M2,	M0,M1,M2,	Promoter Flanking Region,	4	3537	lnc-PGPEP1-6	lnc-PGPEP1-6:3	o	NONHSAG025120.1	NONHSAT062942.1	o	-	-	u
MN297596	LHRI_LNC376.1	LHRI_LNC376	19	44684991	44689003	+	19:44684991-44689003:+	AC243964.2	NA	NA	NA	Promoter Flanking Region,	4	2628	lnc-CEACAM19-2	lnc-CEACAM19-2:1	o	NONHSAG025994.2	NONHSAT066709.2	o	AC243964.2	ENST00000590796.1	i	yes
MK280090	LHRI_LNC1908.9	LHRI_LNC1908	12	6447830	6451512	-	12:6447830-6451512:-	CD27-AS1	M0,M1,	M1,M0,M2,	M0,M1,	Promoter,	3	463	CD27-AS1	CD27-AS1:3	j	NONHSAG010301.2	NONHSAT026072.2	j	CD27-AS1	ENST00000545339.5	j	yes
MN298544	LHRI_LNC1455.1	LHRI_LNC1455	8	143267558	143268814	+	8:143267558-143268814:+	AC138696.1	M0,M1,	M2,	NA	TF binding site,Promoter Flanking Region,Promoter,	1	1257	-	-	u	NONHSAG099836.1	NONHSAT217781.1	i	-	-	u
MN297431	LHRI_LNC198.4	LHRI_LNC198	17	30709608	30776402	+	17:30709608-30776402:+	SUZ12P1	M0,M1,	NA	NA	Promoter,	7	839	lnc-ATAD5-9	lnc-ATAD5-9:8	j	NONHSAG021408.2	NONHSAT052812.2	j	AC127024.3	ENST00000582841.1	x	yes
MN298036	LHRI_LNC862.1	LHRI_LNC862	3	136229783	136230124	+	3:136229783-136230124:+	NA	NA	NA	NA	NA	1	342	lnc-PCCB-1	lnc-PCCB-1:1	i	NONHSAG036167.2	NONHSAT092275.2	i	-	-	u
MN297177	LHRI_LNC1978.2	LHRI_LNC1978	12	92557183	92630227	+	12:92557183-92630227:+	NA	NA	NA	NA	Promoter Flanking Region,Enhancer,	3	1155	lnc-C12orf74-1	lnc-C12orf74-1:2	j	NONHSAG011899.2	NONHSAT029895.2	j	-	-	u
MN298355	LHRI_LNC1233.5	LHRI_LNC1233	6	158999900	159027578	+	6:158999900-159027578:+	AL035530.2	M0,M1,	M2,M0,	M0,	Promoter,	3	1021	lnc-FNDC1-10	lnc-FNDC1-10:5	j	NONHSAG045270.2	NONHSAT208332.1	j	AL035530.2	ENST00000607391.5	j	yes
MN297769	LHRI_LNC598.1	LHRI_LNC598	2	218777018	218783742	-	2:218777018-218783742:-	CYP27A1	M0,M1,	M2,M1,M0,	M1,M0,	Promoter Flanking Region,Promoter,	2	1301	-	-	u	NONHSAG030538.2	NONHSAT183568.1	x	-	-	u
MN296884	LHRI_LNC812.1	LHRI_LNC812	1	155930818	155931053	-	1:155930818-155931053:-	KHDC4	M1,	M1,M0,M2,	NA	Promoter,	1	236	lnc-KHDC4-1	lnc-KHDC4-1:2	p	NONHSAG003094.1	NONHSAT006784.1	i	-	-	u
MN298467	LHRI_LNC1367.1	LHRI_LNC1367	7	155298427	155298969	-	7:155298427-155298969:-	INSIG1	M0,M1,	M1,M0,M2,	M0,M1,	Promoter,	1	543	lnc-CNPY1-10	lnc-CNPY1-10:1	c	NONHSAG049247.2	NONHSAT124366.2	c	-	-	u
MN297352	LHRI_LNC87.1	LHRI_LNC87	16	15028115	15030407	-	16:15028115-15030407:-	PDXDC1	NA	M1,M0,M2,	NA	Open chromatin,	2	1613	-	-	u	-	-	u	-	-	u		Yes
MN297770	LHRI_LNC599.1	LHRI_LNC599	2	219070645	219071581	-	2:219070645-219071581:-	NA	NA	M1,M2,	NA	CTCF Binding Site,TF binding site,	1	937	-	-	u	-	-	u	-	-	u		Yes
MK280122	LHRI_LNC2006.1	LHRI_LNC2006	13	18298807	18299106	+	13:18298807-18299106:+	AL356585.2	NA	M1,M0,M2,	NA	CTCF Binding Site,Open chromatin,	1	300	-	-	u	-	-	u	-	-	u		Yes
MK280641	LHRI_LNC1583.2	LHRI_LNC1583	9	137034395	137037955	+	9:137034395-137037955:+	C9orf139	NA	M1,M0,M2,	NA	CTCF Binding Site,	2	3223	lnc-PAXX-2	lnc-PAXX-2:2	j	NONHSAG053833.2	NONHSAT135654.2	j	C9orf139	ENST00000457302.2	j	yes
MN296832	LHRI_LNC311.1	LHRI_LNC311	1	108051160	108051777	+	1:108051160-108051777:+	AL390036.1	NA	NA	NA	CTCF Binding Site,Promoter Flanking Region,	1	618	VAV3-AS1	VAV3-AS1:13	i	NONHSAG002301.2	NONHSAT004972.2	i	AL390036.1	ENST00000634635.1	i	yes
MN297793	LHRI_LNC630.5	LHRI_LNC630	20	17658824	17659942	+	20:17658824-17659942:+	RRBP1	NA	M2,M1,M0,	NA	Promoter Flanking Region,	3	999	lnc-BFSP1-4	lnc-BFSP1-4:1	x	NONHSAG031342.2	NONHSAT189382.1	x	-	-	u
MN298672	LHRI_LNC1582.1	LHRI_LNC1582	9	136860574	136861274	-	9:136860574-136861274:-	MAMDC4	NA	M1,M0,M2,	NA	NA	1	701	-	-	u	NONHSAG053715.1	NONHSAT135347.1	x	-	-	u
MN297559	LHRI_LNC323.1	LHRI_LNC323	19	11577764	11583669	+	19:11577764-11583669:+	ACP5	M0,M1,	M2,M1,M0,	M2,M0,	Promoter Flanking Region,Promoter,	3	954	-	-	u	NONHSAG024843.1	NONHSAT061164.1	o	-	-	u
MN298586	LHRI_LNC1507.1	LHRI_LNC1507	9	40990619	40992109	-	9:40990619-40992109:-	NA	M0,M1,	M0,M1,M2,	M0,M2,M1,	Promoter,	1	1491	-	-	u	-	-	u	-	-	u		Yes
MN298280	LHRI_LNC1148.1	LHRI_LNC1148	6	27158117	27158372	+	6:27158117-27158372:+	NA	NA	NA	NA	Promoter Flanking Region,	1	256	lnc-HIST1H2AH-5	lnc-HIST1H2AH-5:1	c	-	-	u	-	-	u
MN297606	LHRI_LNC389.1	LHRI_LNC389	19	51138781	51140603	-	19:51138781-51140603:-	NA	NA	M0,	M0,M1,	Promoter Flanking Region,	1	1823	-	-	u	-	-	u	-	-	u		Yes
MN298022	LHRI_LNC847.1	LHRI_LNC847	3	113031710	113031973	-	3:113031710-113031973:-	AC078785.1	NA	NA	NA	CTCF Binding Site,	1	264	-	-	u	NONHSAG035752.2	NONHSAT091210.2	i	AC078785.1	ENST00000496389.5	i	yes
MN297187	LHRI_LNC1991.1	LHRI_LNC1991	12	108623524	108624014	+	12:108623524-108624014:+	SELPLG	NA	M1,M0,M2,	NA	Enhancer,	1	491	-	-	u	-	-	u	-	-	u		Yes
MN298506	LHRI_LNC1407.1	LHRI_LNC1407	8	70403903	70404332	-	8:70403903-70404332:-	NA	M1,M0,	NA	M0,	Promoter,	1	430	lnc-XKR9-3	lnc-XKR9-3:1	x	NONHSAG050474.2	NONHSAT127154.2	x	-	-	u
MN297683	LHRI_LNC492.1	LHRI_LNC492	2	95145029	95146948	-	2:95145029-95146948:-	MRPS5	NA	M1,M0,M2,	NA	NA	1	1920	lnc-MRPS5-3	lnc-MRPS5-3:1	i	-	-	u	-	-	u
MK280629	LHRI_LNC1524.3	LHRI_LNC1524	9	72305517	72347279	+	9:72305517-72347279:+	LINC01504	M0,	M2,	M0,M1,	Promoter,	6	2021	LINC01504	LINC01504:4	j	NONHSAG052554.2	NONHSAT131858.2	j	LINC01504	ENST00000436054.1	j	yes
MN298351	LHRI_LNC1227.1	LHRI_LNC1227	6	151391737	151394594	+	6:151391737-151394594:+	NA	M1,M0,	M2,M0,	M0,M1,	Promoter,	1	2858	lnc-AKAP12-1	lnc-AKAP12-1:1	c	NONHSAG045160.2	NONHSAT115567.2	c	-	-	u
MN298219	LHRI_LNC1090.1	LHRI_LNC1090	5	138543508	138544137	+	5:138543508-138544137:+	NA	M0,M1,	M1,M0,M2,	M1,M0,	Promoter,	1	630	lnc-CTNNA1-4	lnc-CTNNA1-4:2	c	NONHSAG041676.2	NONHSAT104039.2	c	-	-	u
MN297289	LHRI_LNC2111.6	LHRI_LNC2111	15	38025898	38066310	+	15:38025898-38066310:+	LINC02345	NA	M2,	NA	CTCF Binding Site,	5	4954	LINC02345	LINC02345:33	j	NONHSAG016540.2	NONHSAT041703.2	j	LINC02345	ENST00000558897.1	j	yes
MN298080	LHRI_LNC922.1	LHRI_LNC922	4	498266	498722	-	4:498266-498722:-	ZNF721	M0,M1,	M0,M1,M2,	NA	Promoter,	1	457	-	-	u	-	-	u	-	-	u		Yes
MN297714	LHRI_LNC526.1	LHRI_LNC526	2	113971873	113973194	+	2:113971873-113973194:+	NA	NA	M2,M0,M1,	NA	NA	1	1322	lnc-SLC35F5-4	lnc-SLC35F5-4:1	x	NONHSAG029041.2	NONHSAT073853.2	x	-	-	u
MN298709	LHRI_LNC1662.1	LHRI_LNC1662	X	100843164	100843460	+	X:100843164-100843460:+	NOX1	NA	M1,M0,M2,	NA	NA	1	297	-	-	u	-	-	u	-	-	u		Yes
MN297723	LHRI_LNC540.1	LHRI_LNC540	2	148030579	148032574	+	2:148030579-148032574:+	MBD5	NA	M2,	NA	NA	1	1996	lnc-MBD5-1	lnc-MBD5-1:2	i	-	-	u	-	-	u
MN298160	LHRI_LNC1020.2	LHRI_LNC1020	5	6773216	6779208	+	5:6773216-6779208:+	AC122710.3,NA	NA	NA	NA	Open chromatin,Promoter Flanking Region,	5	1687	lnc-PAPD7-2	lnc-PAPD7-2:9	j	NONHSAG039756.2	NONHSAT100219.2	j	AC122710.2	ENST00000648399.1	j	yes
MN296851	LHRI_LNC413.1	LHRI_LNC413	1	117838236	117838456	-	1:117838236-117838456:-	NA	NA	M2,M0,	NA	Open chromatin,	1	221	lnc-GDAP2-2	lnc-GDAP2-2:2	c	NONHSAG002549.1	NONHSAT005475.1	x	-	-	u
MN298534	LHRI_LNC1446.1	LHRI_LNC1446	8	131682131	131683274	-	8:131682131-131683274:-	NA	NA	NA	NA	NA	1	1144	-	-	u	-	-	u	-	-	u		Yes
MN298528	LHRI_LNC1436.1	LHRI_LNC1436	8	115536089	115583224	-	8:115536089-115583224:-	TRPS1	NA	M2,	M0,	Promoter Flanking Region,	2	3444	lnc-UTP23-10	lnc-UTP23-10:2	x	NONHSAG051082.2	NONHSAT128363.2	y	-	-	u
MN297660	LHRI_LNC457.1	LHRI_LNC457	2	54083105	54083597	+	2:54083105-54083597:+	ACYP2	NA	M2,	NA	TF binding site,Open chromatin,CTCF Binding Site,	1	493	lnc-PSME4-2	lnc-PSME4-2:1	x	NONHSAG027769.2	NONHSAT070719.2	x	AC008280.3	ENST00000606436.1	i	yes
MN296775	LHRI_LNC107.1	LHRI_LNC107	1	2516095	2516728	-	1:2516095-2516728:-	PANK4	NA	M2,M0,M1,	NA	Open chromatin,	1	634	-	-	u	-	-	u	-	-	u		Yes
MN296905	LHRI_LNC1175.1	LHRI_LNC1175	1	198930020	198931116	-	1:198930020-198931116:-	MIR181A1HG	NA	NA	M0,	Promoter Flanking Region,Promoter,	1	1097	lnc-ATP6V1G3-4	lnc-ATP6V1G3-4:4	i	NONHSAG003880.1	NONHSAT008654.1	i	MIR181A1HG	ENST00000432296.1	i	yes
MN297578	LHRI_LNC352.1	LHRI_LNC352	19	24038586	24039835	+	19:24038586-24039835:+	AC092279.1	NA	M2,M1,M0,	NA	NA	1	1250	lnc-ZNF726-2	lnc-ZNF726-2:1	c	NONHSAG025370.2	NONHSAT063953.2	c	AC092279.1	ENST00000597683.1	i	yes
MK280478	LHRI_LNC1111.1	LHRI_LNC1111	5	160436849	160437712	+	5:160436849-160437712:+	NA	NA	NA	NA	CTCF Binding Site,Promoter Flanking Region,	2	752	lnc-PTTG1-4	lnc-PTTG1-4:1	o	NONHSAG042101.2	NONHSAT104850.2	o	-	-	u
MN296890	LHRI_LNC929.1	LHRI_LNC929	1	161749403	161750335	-	1:161749403-161750335:-	DUSP12	M0,M1,	M0,M1,M2,	NA	Promoter,	1	933	lnc-FCGR3B-4	lnc-FCGR3B-4:10	c	NONHSAG003278.2	NONHSAT007202.2	o	-	-	u
MN298696	LHRI_LNC1641.1	LHRI_LNC1641	X	54569044	54569408	+	X:54569044-54569408:+	NA	NA	M0,M1,M2,	NA	NA	1	365	-	-	u	NONHSAG054583.1	NONHSAT137226.1	i	-	-	u
MN298201	LHRI_LNC1067.1	LHRI_LNC1067	5	87374511	87374717	-	5:87374511-87374717:-	RASA1	NA	M1,M0,M2,	NA	NA	1	207	lnc-TMEM161B-16	lnc-TMEM161B-16:1	p	NONHSAG091094.1	NONHSAT204415.1	p	-	-	u
MN297207	LHRI_LNC2021.1	LHRI_LNC2021	13	45389560	45389913	-	13:45389560-45389913:-	TPT1-AS1	NA	M1,M0,M2,	NA	Promoter,	1	354	TPT1-AS1	TPT1-AS1:49	x	NONHSAG013413.2	NONHSAT033606.2	x	TPT1-AS1	ENST00000330825.3	x	Yes?
MN298305	LHRI_LNC1184.5	LHRI_LNC1184	6	46775556	46789448	+	6:46775556-46789448:+	NA	NA	NA	M1,M0,	Promoter Flanking Region,	4	934	-	-	u	-	-	u	-	-	u		Yes
MN297419	LHRI_LNC181.1	LHRI_LNC181	17	17210583	17211946	-	17:17210583-17211946:-	MPRIP	NA	M2,M1,M0,	NA	Open chromatin,	1	1364	-	-	u	NONHSAG072999.1	NONHSAT174961.1	i	-	-	u
MN297782	LHRI_LNC616.1	LHRI_LNC616	20	1885259	1885787	-	20:1885259-1885787:-	NA	NA	M0,M2,	NA	Promoter Flanking Region,	1	529	lnc-PDYN-1	lnc-PDYN-1:12	c	-	-	u	-	-	u
MN298016	LHRI_LNC840.1	LHRI_LNC840	3	101695461	101695764	+	3:101695461-101695764:+	NA	NA	NA	NA	CTCF Binding Site,Open chromatin,	1	304	lnc-CEP97-8	lnc-CEP97-8:5	c	NONHSAG035626.1	NONHSAT090919.1	i	-	-	u
MN298478	LHRI_LNC1377.8	LHRI_LNC1377	8	12437140	12566912	+	8:12437140-12566912:+	AC145124.1,AC068587.4	M1,M0,	NA	NA	Promoter,Promoter Flanking Region,	5	2689	lnc-ZNF705D-2	lnc-ZNF705D-2:39	j	NONHSAG049565.2	NONHSAT215437.1	j	AC068587.4	ENST00000641839.1	x	yes
MN297443	LHRI_LNC206.1	LHRI_LNC206	17	36786262	36786544	-	17:36786262-36786544:-	NA	NA	NA	NA	NA	1	283	-	-	u	NONHSAG073104.1	NONHSAT175154.1	x	-	-	u
MN298657	LHRI_LNC1568.1	LHRI_LNC1568	9	129221650	129287269	+	9:129221650-129287269:+	AL161785.2,AL161785.1	NA	NA	NA	NA	2	1504	lnc-PTPA-3	lnc-PTPA-3:6	o	NONHSAG102348.1	NONHSAT221379.1	x	AL161785.2	ENST00000427080.1	y	yes
MN296969	LHRI_LNC1719.1	LHRI_LNC1719	10	33333884	33334660	+	10:33333884-33334660:+	NRP1	M0,M1,	M0,M1,M2,	M0,M1,M2,	Promoter,	2	669	-	-	u	NONHSAG005579.1	NONHSAT012667.1	i	-	-	u
MN297269	LHRI_LNC2087.1	LHRI_LNC2087	14	92750389	92752456	+	14:92750389-92752456:+	NA	M1,M0,	NA	NA	Promoter Flanking Region,Promoter,CTCF Binding Site,	2	1837	-	-	u	-	-	u	-	-	u		Yes
MN297522	LHRI_LNC281.5	LHRI_LNC281	18	3466297	3487048	+	18:3466297-3487048:+	GAPLINC	NA	M0,M1,	M0,	Promoter Flanking Region,	4	506	GAPLINC	GAPLINC:8	j	NONHSAG023235.2	NONHSAT056995.2	j	GAPLINC	ENST00000579007.5	j	yes
MN297418	LHRI_LNC180.1	LHRI_LNC180	17	17209161	17209441	-	17:17209161-17209441:-	MPRIP	NA	M2,M0,M1,	NA	Open chromatin,	1	281	-	-	u	NONHSAG072999.1	NONHSAT174961.1	i	-	-	u
MN297020	LHRI_LNC1793.1	LHRI_LNC1793	11	506985	507245	+	11:506985-507245:+	RNH1	M1,M0,	M2,M1,M0,	M0,M1,	Promoter,	1	261	lnc-LRRC56-1	lnc-LRRC56-1:4	c	NONHSAG007316.2	NONHSAT017261.2	c	-	-	u
MN298008	LHRI_LNC831.1	LHRI_LNC831	3	63981865	63982181	+	3:63981865-63982181:+	ATXN7	NA	M2,M1,M0,	NA	Open chromatin,Promoter Flanking Region,	1	317	-	-	u	NONHSAG035318.2	NONHSAT193972.1	i	-	-	u
MN296918	LHRI_LNC1276.1	LHRI_LNC1276	1	206653265	206653969	+	1:206653265-206653969:+	DYRK3	NA	M0,M1,	NA	TF binding site,	1	705	-	-	u	NONHSAG004091.1	NONHSAT009066.1	e	-	-	u
MK280275	LHRI_LNC421.1	LHRI_LNC421	2	24491230	24491510	+	2:24491230-24491510:+	NA	M1,M0,	NA	M0,	Promoter,	1	281	-	-	u	-	-	u	-	-	u		Yes
MN297504	LHRI_LNC261.1	LHRI_LNC261	17	74209980	74213316	-	17:74209980-74213316:-	AC100786.1	M1,M0,	M2,M0,M1,	M0,	Promoter,	1	3337	lnc-BTBD17-3	lnc-BTBD17-3:2	e	NONHSAG022690.2	NONHSAT055775.2	e	MGC16275	ENST00000499670.2	e	yes
MK280394	LHRI_LNC759.1	LHRI_LNC759	22	49843999	49848655	-	22:49843999-49848655:-	RF00017	M0,M1,	M1,M2,	NA	Promoter Flanking Region,	2	2635	lnc-BRD1-5	lnc-BRD1-5:1	j	NONHSAG034224.2	NONHSAT087425.2	j	-	-	u
MN297542	LHRI_LNC300.2	LHRI_LNC300	18	76805151	76822298	-	18:76805151-76822298:-	AC027575.2,ZNF236-DT	M0,M1,	M0,M1,M2,	M1,M2,M0,	Promoter,Promoter Flanking Region,	3	4725	ZNF236-DT	ZNF236-DT:23	k	NONHSAG024210.2	NONHSAT178683.1	k	AC027575.2	ENST00000622010.1	k	yes
MK280298	LHRI_LNC511.1	LHRI_LNC511	2	106403638	106404609	-	2:106403638-106404609:-	RGPD3	NA	M0,M1,M2,	NA	Open chromatin,	1	972	-	-	u	-	-	u	-	-	u		Yes
MN296784	LHRI_LNC933.1	LHRI_LNC933	1	9184790	9185709	+	1:9184790-9185709:+	MIR34AHG	M0,M1,	M0,M1,M2,	M1,M0,	Promoter,Open chromatin,	1	920	LINC01759	LINC01759:25	c	NONHSAG000311.2	NONHSAT000793.2	e	MIR34AHG	ENST00000635405.2	x	yes
MK280469	LHRI_LNC1080.1	LHRI_LNC1080	5	123226255	123226530	+	5:123226255-123226530:+	NA	NA	NA	NA	Promoter Flanking Region,Open chromatin,	1	276	-	-	u	-	-	u	-	-	u		Yes
MN298139	LHRI_LNC995.1	LHRI_LNC995	4	143336310	143336683	+	4:143336310-143336683:+	NA	M0,M1,	NA	M0,M1,	Promoter,	1	374	lnc-FREM3-6	lnc-FREM3-6:1	x	NONHSAG038986.1	NONHSAT098534.1	i	-	-	u
MN298047	LHRI_LNC877.1	LHRI_LNC877	3	152870110	152873871	+	3:152870110-152873871:+	NA	NA	M2,	M0,	Open chromatin,Promoter Flanking Region,	2	3606	-	-	u	NONHSAG085062.1	NONHSAT194676.1	j	-	-	u
MK280281	LHRI_LNC459.1	LHRI_LNC459	2	55050001	55050256	+	2:55050001-55050256:+	RTN4	M0,M1,	NA	M1,M0,	Promoter,	1	256	-	-	u	NONHSAG027791.2	NONHSAT070759.2	e	-	-	u
MN298554	LHRI_LNC1469.1	LHRI_LNC1469	9	3521746	3522008	-	9:3521746-3522008:-	RFX3	NA	M0,	NA	Promoter,	1	263	-	-	u	-	-	u	-	-	u		Yes
MN297499	LHRI_LNC254.1	LHRI_LNC254	17	64496615	64497265	+	17:64496615-64497265:+	POLG2	M1,M0,	M2,M0,M1,	NA	Promoter,	1	651	-	-	u	-	-	u	-	-	u		Yes
MN296994	LHRI_LNC1759.1	LHRI_LNC1759	10	87315108	87315387	-	10:87315108-87315387:-	NUTM2A-AS1	NA	M0,M1,M2,	NA	Open chromatin,	1	280	NUTM2A-AS1	NUTM2A-AS1:50	i	NONHSAG006409.1	NONHSAT015348.1	o	NUTM2A-AS1	ENST00000446751.5	i	Yes?
MN298631	LHRI_LNC1533.1	LHRI_LNC1533	9	92838271	92838493	-	9:92838271-92838493:-	ANKRD19P	NA	NA	NA	CTCF Binding Site,	1	223	lnc-ZNF484-3	lnc-ZNF484-3:1	c	-	-	u	-	-	u
MK280495	LHRI_LNC1183.1	LHRI_LNC1183	6	45555196	45560417	-	6:45555196-45560417:-	RUNX2	NA	M2,	NA	NA	2	2062	RUNX2-AS1	RUNX2-AS1:22	j	NONHSAG043865.2	NONHSAT112982.2	j	-	-	u
MK279933	LHRI_LNC289.2	LHRI_LNC289	1	14397	29331	-	1:14397-29331:-	MIR6859-1,MIR6859-2	M1,M0,	M1,M0,M2,	M0,M1,M2,	Promoter,	8	7020	lnc-OR4F29-11	lnc-OR4F29-11:4	j	NONHSAG000002.2	NONHSAT000009.2	j	-	-	u
MN298123	LHRI_LNC975.2	LHRI_LNC975	4	105137415	105139077	-	4:105137415-105139077:-	AC004069.1	NA	NA	NA	CTCF Binding Site,Open chromatin,	2	340	lnc-PPA2-4	lnc-PPA2-4:2	j	NONHSAG038559.2	NONHSAT200257.1	j	AC004069.1	ENST00000504082.1	j	yes
MN298487	LHRI_LNC1384.1	LHRI_LNC1384	8	26450960	26452388	+	8:26450960-26452388:+	BNIP3L	M0,M1,	M2,	M0,M1,	Promoter Flanking Region,	1	1429	lnc-DPYSL2-1	lnc-DPYSL2-1:2	c	NONHSAG049807.2	NONHSAT125654.2	c	-	-	u
MN297786	LHRI_LNC622.1	LHRI_LNC622	20	3811138	3811853	-	20:3811138-3811853:-	AL109804.1	NA	M2,	M0,	Promoter,	1	716	lnc-CENPB-1	lnc-CENPB-1:1	c	NONHSAG031164.2	NONHSAT078249.2	c	AL109804.1	ENST00000620777.1	x	yes
MN298542	LHRI_LNC1452.1	LHRI_LNC1452	8	134803087	134803954	-	8:134803087-134803954:-	MIR30D	NA	M2,M0,M1,	NA	TF binding site,Enhancer,	1	868	lnc-ZFAT-1	lnc-ZFAT-1:6	c	NONHSAG051344.1	NONHSAT129244.1	x	-	-	u
MN297608	LHRI_LNC391.1	LHRI_LNC391	19	51833575	51834113	+	19:51833575-51834113:+	ZNF577	NA	M0,M1,M2,	NA	NA	1	539	lnc-FPR1-2	lnc-FPR1-2:3	i	NONHSAG026384.2	NONHSAT067481.2	i	-	-	u
MN297705	LHRI_LNC519.1	LHRI_LNC519	2	112275133	112275385	-	2:112275133-112275385:-	NA	M0,	NA	M0,M1,	TF binding site,Promoter,	1	253	lnc-ZC3H8-7	lnc-ZC3H8-7:1	c	-	-	u	-	-	u
MK280420	LHRI_LNC859.1	LHRI_LNC859	3	129382922	129399655	-	3:129382922-129399655:-	RPL32P3,IFT122	M1,	M2,M1,M0,	M0,	Promoter,	5	11351	lnc-EFCAB12-2	lnc-EFCAB12-2:16	k	NONHSAG036052.2	NONHSAT092040.2	k	-	-	u
MN298518	LHRI_LNC1424.1	LHRI_LNC1424	8	93727547	93727940	-	8:93727547-93727940:-	FAM92A	NA	M0,M1,M2,	NA	NA	1	394	-	-	u	NONHSAG050747.1	NONHSAT127713.1	c	-	-	u
MN297687	LHRI_LNC494.3	LHRI_LNC494	2	96061197	96063800	+	2:96061197-96063800:+	NA	NA	M2,	M2,	CTCF Binding Site,Promoter Flanking Region,	3	1828	-	-	u	-	-	u	-	-	u		Yes
MK280683	LHRI_LNC1691.7	LHRI_LNC1691	Y	7335835	7356223	+	Y:7335835-7356223:+	PRKY	NA	NA	NA	NA	3	4397	lnc-TBL1Y-10	lnc-TBL1Y-10:1	j	NONHSAG055694.2	NONHSAT139355.2	j	-	-	u
MN298012	LHRI_LNC834.1	LHRI_LNC834	3	75734837	75735637	-	3:75734837-75735637:-	ZNF717	NA	M2,M0,	NA	NA	1	801	-	-	u	-	-	u	-	-	u		Yes
MK280020	LHRI_LNC1753.1	LHRI_LNC1753	10	79811854	79812336	-	10:79811854-79812336:-	NUTM2B-AS1	NA	M2,M1,M0,	NA	NA	1	483	NUTM2B-AS1	NUTM2B-AS1:42	i	NONHSAG006340.2	NONHSAT015166.2	i	NUTM2B-AS1	ENST00000601369.5	i	Yes?
MN297964	LHRI_LNC785.1	LHRI_LNC785	3	23069602	23069884	+	3:23069602-23069884:+	NA	NA	NA	M0,M1,	Promoter Flanking Region,	1	283	-	-	u	-	-	u	-	-	u		Yes
MK280063	LHRI_LNC1846.1	LHRI_LNC1846	11	65662990	65671717	+	11:65662990-65671717:+	RELA	M1,M0,	M1,M0,M2,	M1,M0,	Promoter,	4	664	lnc-SIPA1-2	lnc-SIPA1-2:4	j	NONHSAG008695.2	NONHSAT159255.1	j	AP001362.2	ENST00000648185.1	j	yes
MN296841	LHRI_LNC343.9	LHRI_LNC343	1	110508181	110560150	+	1:110508181-110560150:+	KCNA2,KCNA3	NA	M2,M0,	M0,M1,	Promoter Flanking Region,	2	8649	lnc-PROK1-4	lnc-PROK1-4:3	j	NONHSAG002362.1	NONHSAT005078.1	o	-	-	u
MN298569	LHRI_LNC1483.2	LHRI_LNC1483	9	27075429	27081806	+	9:27075429-27081806:+	NA	NA	M0,M2,	NA	NA	3	1279	-	-	u	-	-	u	-	-	u		Yes
MN296794	LHRI_LNC1786.1	LHRI_LNC1786	1	19294198	19294807	-	1:19294198-19294807:-	NA	NA	M0,M2,	NA	CTCF Binding Site,	1	610	lnc-AKR7A3-1	lnc-AKR7A3-1:1	c	NONHSAG000542.2	NONHSAT001292.2	c	-	-	u
MN297357	LHRI_LNC94.1	LHRI_LNC94	16	22298057	22298505	+	16:22298057-22298505:+	POLR3E	M0,M1,	M2,M0,M1,	NA	Promoter,TF binding site,	1	449	-	-	u	NONHSAG018864.1	NONHSAT141052.1	e	-	-	u
MN297396	LHRI_LNC153.2	LHRI_LNC153	16	83794882	83806127	-	16:83794882-83806127:-	AC009119.1	M1,M0,	NA	M0,	Promoter,	4	3141	lnc-SLC38A8-2	lnc-SLC38A8-2:11	j	NONHSAG020131.2	NONHSAT144012.2	j	AC009119.1	ENST00000567342.1	j	yes
MN297996	LHRI_LNC818.1	LHRI_LNC818	3	50659994	50660811	+	3:50659994-50660811:+	NA	NA	M1,	NA	NA	1	818	-	-	u	-	-	u	-	-	u		Yes
MN296779	LHRI_LNC407.1	LHRI_LNC407	1	6612522	6613142	-	1:6612522-6613142:-	KLHL21	M0,M1,	NA	NA	Promoter,	1	621	-	-	u	NONHSAG000247.1	NONHSAT000652.1	i	-	-	u
MN297557	LHRI_LNC321.1	LHRI_LNC321	19	11565071	11566735	-	19:11565071-11566735:-	ZNF627	NA	M2,	M0,	TF binding site,Open chromatin,Promoter Flanking Region,	1	1665	lnc-ACP5-2	lnc-ACP5-2:1	p	NONHSAG024851.2	NONHSAT061176.2	i	-	-	u
MN297108	LHRI_LNC1889.1	LHRI_LNC1889	11	124777081	124777397	-	11:124777081-124777397:-	MSANTD2	NA	M0,M1,M2,	NA	CTCF Binding Site,	1	317	lnc-ESAM-2	lnc-ESAM-2:1	p	NONHSAG009940.2	NONHSAT024899.2	p	-	-	u
MN298286	LHRI_LNC1154.1	LHRI_LNC1154	6	28226311	28226650	+	6:28226311-28226650:+	ZSCAN9	M1,M0,	M1,M0,M2,	NA	Promoter,	1	340	-	-	u	-	-	u	-	-	u		Yes
MN298502	LHRI_LNC1404.5	LHRI_LNC1404	8	65979206	65982938	+	8:65979206-65982938:+	NA	NA	M2,	M1,M0,	Promoter Flanking Region,CTCF Binding Site,	3	1583	-	-	u	-	-	u	-	-	u		Yes
MN298535	LHRI_LNC1447.1	LHRI_LNC1447	8	131694561	131694805	-	8:131694561-131694805:-	NA	NA	NA	NA	NA	1	245	-	-	u	-	-	u	-	-	u		Yes
MN297342	LHRI_LNC72.1	LHRI_LNC72	16	2272069	2272960	+	16:2272069-2272960:+	AC009065.4	NA	M2,M0,M1,	NA	Open chromatin,	1	892	lnc-DNASE1L2-2	lnc-DNASE1L2-2:11	c	NONHSAG018326.2	NONHSAT052091.2	c	AC009065.4	ENST00000562838.1	i	yes
MK280621	LHRI_LNC1513.1	LHRI_LNC1513	9	63689013	63689359	-	9:63689013-63689359:-	NA	NA	M1,M0,M2,	NA	NA	1	347	-	-	u	-	-	u	-	-	u		Yes
MN297747	LHRI_LNC570.1	LHRI_LNC570	2	191600073	191604929	+	2:191600073-191604929:+	NA	NA	M0,M1,M2,	M1,	Promoter Flanking Region,Open chromatin,TF binding site,	3	1058	-	-	u	-	-	u	-	-	u		Yes
MK280649	LHRI_LNC1631.1	LHRI_LNC1631	X	41613288	41613516	-	X:41613288-41613516:-	CASK	NA	M2,M0,M1,	NA	CTCF Binding Site,	1	229	-	-	u	NONHSAG054309.1	NONHSAT136744.1	i	-	-	u
MN297345	LHRI_LNC79.1	LHRI_LNC79	16	3133785	3134201	-	16:3133785-3134201:-	ZNF213	M0,M1,	M0,M1,M2,	NA	TF binding site,Promoter,	1	417	lnc-ZSCAN10-3	lnc-ZSCAN10-3:34	c	NONHSAG018393.2	NONHSAT147965.2	x	ZNF213-AS1	ENST00000572691.2	i	yes
MN298591	LHRI_LNC1504.1	LHRI_LNC1504	9	41241436	41241642	+	9:41241436-41241642:+	NA	NA	M2,M1,M0,	NA	CTCF Binding Site,	1	207	-	-	u	-	-	u	-	-	u		Yes
MK280133	LHRI_LNC2033.1	LHRI_LNC2033	13	80341843	80342467	+	13:80341843-80342467:+	NA	M0,M1,	NA	M0,M1,M2,	Promoter,	1	625	lnc-NDFIP2-32	lnc-NDFIP2-32:1	p	-	-	u	-	-	u
MN297375	LHRI_LNC123.1	LHRI_LNC123	16	56986318	56989209	-	16:56986318-56989209:-	NA	M1,M0,	M1,	NA	Promoter,	1	2892	lnc-FAM192A-4	lnc-FAM192A-4:3	c	-	-	u	-	-	u
MN297553	LHRI_LNC315.1	LHRI_LNC315	19	4724074	4724326	+	19:4724074-4724326:+	DPP9	M1,M0,	M0,M1,M2,	M0,M1,	Promoter,	1	253	-	-	u	NONHSAG076333.1	NONHSAT180108.1	i	-	-	u
MN298417	LHRI_LNC1295.1	LHRI_LNC1295	7	77532935	77533245	-	7:77532935-77533245:-	NA	NA	M2,	NA	CTCF Binding Site,Enhancer,	1	311	APTR	APTR:16	i	NONHSAG048051.2	NONHSAT121657.2	i	-	-	u
MN298158	LHRI_LNC1018.1	LHRI_LNC1018	5	269578	269790	-	5:269578-269790:-	AC021087.1	M1,	M1,M0,M2,	NA	Promoter,	1	213	lnc-CCDC127-1	lnc-CCDC127-1:7	c	NONHSAG039620.2	NONHSAT099849.2	c	HRAT5	ENST00000512642.1	p	yes
MN297546	LHRI_LNC305.1	LHRI_LNC305	19	1855588	1856815	+	19:1855588-1856815:+	KLF16	M0,	M1,M0,M2,	M0,M1,M2,	Promoter,	1	1228	lnc-SCAMP4-4	lnc-SCAMP4-4:2	p	NONHSAG024395.1	NONHSAT060368.1	p	AC012615.3	ENST00000592884.2	p	yes
MN297106	LHRI_LNC1885.1	LHRI_LNC1885	11	117985731	117986003	-	11:117985731-117986003:-	NA	M0,M1,	M1,M0,	M1,M0,	Promoter,	1	273	-	-	u	-	-	u	-	-	u		Yes
MN297299	LHRI_LNC2124.1	LHRI_LNC2124	15	63490589	63491224	-	15:63490589-63491224:-	NA	NA	NA	M0,M1,	Promoter Flanking Region,	1	636	-	-	u	NONHSAG017133.2	NONHSAT170905.1	x	-	-	u
MK280231	LHRI_LNC219.1	LHRI_LNC219	17	43303406	43305201	+	17:43303406-43305201:+	LINC00854	M0,M1,M2,	M0,M1,M2,	M1,M2,M0,	CTCF Binding Site,	1	1796	lnc-TMEM106A-3	lnc-TMEM106A-3:1	k	NONHSAG021879.2	NONHSAT053844.2	k	-	-	u
MN297188	LHRI_LNC1990.1	LHRI_LNC1990	12	109048777	109049546	-	12:109048777-109049546:-	USP30	NA	M2,M1,	NA	Promoter,Open chromatin,	1	770	-	-	u	-	-	u	-	-	u		Yes
MN296876	LHRI_LNC699.1	LHRI_LNC699	1	151428663	151429068	-	1:151428663-151429068:-	POGZ	NA	M2,M1,M0,	NA	NA	1	406	-	-	u	-	-	u	-	-	u		Yes
MN296854	LHRI_LNC452.1	LHRI_LNC452	1	120321455	120322058	+	1:120321455-120322058:+	AC244669.1	NA	M2,M0,M1,	NA	CTCF Binding Site,Open chromatin,	1	604	-	-	u	-	-	u	-	-	u		Yes
MN298177	LHRI_LNC1036.1	LHRI_LNC1036	5	43494806	43495032	-	5:43494806-43495032:-	AC114956.3	NA	M1,M0,M2,	NA	NA	1	227	-	-	u	NONHSAG040315.2	NONHSAT202557.1	i	AC114956.3	ENST00000505645.1	i	yes
MK279991	LHRI_LNC1091.1	LHRI_LNC1091	1	180436538	180436764	+	1:180436538-180436764:+	ACBD6	NA	M1,M0,M2,	NA	NA	1	227	-	-	u	-	-	u	-	-	u		Yes
MN298594	LHRI_LNC1509.3	LHRI_LNC1509	9	62801487	62806333	+	9:62801487-62806333:+	LINC01410	M0,M1,	M2,M0,M1,	M1,M2,M0,	Promoter,CTCF Binding Site,	3	225	LINC01410	LINC01410:9	j	NONHSAG052409.2	NONHSAT131524.2	j	LINC01410	ENST00000424345.5	j	yes
MN298378	LHRI_LNC1257.1	LHRI_LNC1257	7	5427252	5428727	+	7:5427252-5428727:+	AC092171.3	M1,M0,	NA	M0,M2,M1,	Promoter,	1	1476	lnc-SLC29A4-5	lnc-SLC29A4-5:5	c	NONHSAG046848.2	NONHSAT118916.2	c	AC092171.3	ENST00000610122.1	x	yes
MN298546	LHRI_LNC1459.1	LHRI_LNC1459	8	143548066	143548320	-	8:143548066-143548320:-	AC067930.4	NA	M2,M1,M0,	NA	CTCF Binding Site,Promoter Flanking Region,	1	255	lnc-ZC3H3-1	lnc-ZC3H3-1:2	i	NONHSAG051494.2	NONHSAT129579.2	i	AC067930.4	ENST00000530600.1	i	yes
MN296778	LHRI_LNC338.1	LHRI_LNC338	1	6025731	6026150	-	1:6025731-6026150:-	KCNAB2	M0,M1,	M0,M2,	M0,	Promoter,	1	420	-	-	u	-	-	u	-	-	u		Yes
MN298423	LHRI_LNC1307.1	LHRI_LNC1307	7	99485086	99485529	-	7:99485086-99485529:-	ZNF789	NA	M2,M1,M0,	NA	NA	1	444	lnc-ZNF394-1	lnc-ZNF394-1:1	p	-	-	u	-	-	u
MN297783	LHRI_LNC617.2	LHRI_LNC617	20	1890075	1894544	-	20:1890075-1894544:-	AL117335.1	M1,M0,	M2,M0,M1,	M0,M1,M2,	Promoter,	2	1520	lnc-PDYN-1	lnc-PDYN-1:7	k	NONHSAG031117.2	NONHSAT189210.1	k	AL117335.1	ENST00000615777.1	k	yes
MK280065	LHRI_LNC1854.1	LHRI_LNC1854	11	69012611	69048394	+	11:69012611-69048394:+	MRGPRF	NA	M2,	NA	Promoter,	4	1088	lnc-MRGPRF-7	lnc-MRGPRF-7:3	x	NONHSAG008874.2	NONHSAT159322.1	y	MRGPRF-AS1	ENST00000538407.2	y	yes
MN297093	LHRI_LNC1868.1	LHRI_LNC1868	11	77613476	77613690	-	11:77613476-77613690:-	CLNS1A	NA	M2,M1,M0,	NA	Open chromatin,	1	215	lnc-AQP11-4	lnc-AQP11-4:1	x	NONHSAG009155.2	NONHSAT023216.2	x	-	-	u
MN296929	LHRI_LNC1366.1	LHRI_LNC1366	1	217491890	217492300	-	1:217491890-217492300:-	GPATCH2	NA	M0,M1,M2,	NA	NA	1	411	lnc-SPATA17-2	lnc-SPATA17-2:1	x	NONHSAG004292.2	NONHSAT009498.2	x	-	-	u
MN298001	LHRI_LNC824.1	LHRI_LNC824	3	52695714	52696186	+	3:52695714-52696186:+	GLT8D1	NA	M1,M0,M2,	NA	TF binding site,	1	473	lnc-PBRM1-1	lnc-PBRM1-1:1	x	-	-	u	-	-	u
MK279985	LHRI_LNC902.1	LHRI_LNC902	1	161048146	161049041	+	1:161048146-161049041:+	ARHGAP30	M0,M1,	M2,M0,M1,	M0,M1,	Promoter,	1	896	lnc-KLHDC9-5	lnc-KLHDC9-5:5	p	NONHSAG003236.2	NONHSAT007098.2	c	-	-	u
MK280041	LHRI_LNC1812.21	LHRI_LNC1812	11	21912540	22120118	+	11:21912540-22120118:+	NA,AC107882.1	NA	M0,	NA	NA	5	834	lnc-ANO5-2	lnc-ANO5-2:2	j	NONHSAG007845.2	NONHSAT018380.2	j	AC107882.1	ENST00000530837.1	y	yes
MK280095	LHRI_LNC1915.19	LHRI_LNC1915	12	9648167	9657043	+	12:9648167-9657043:+	AC092821.3	M1,M0,	NA	M0,M1,	Promoter,	4	566	lnc-CLEC2D-8	lnc-CLEC2D-8:7	j	NONHSAG010453.2	NONHSAT026838.2	j	AC092821.3	ENST00000641304.1	j	yes
MN298538	LHRI_LNC1449.4	LHRI_LNC1449	8	131791324	131852647	-	8:131791324-131852647:-	NA	NA	NA	NA	Open chromatin,	3	1013	lnc-OC90-3	lnc-OC90-3:1	y	-	-	u	-	-	u
MN298713	LHRI_LNC1675.1	LHRI_LNC1675	X	120618886	120619474	-	X:120618886-120619474:-	MCTS1	NA	M0,M1,M2,	NA	Open chromatin,	1	589	lnc-MCTS1-1	lnc-MCTS1-1:1	x	NONHSAG055221.2	NONHSAT223551.1	o	-	-	u
MN296932	LHRI_LNC1391.1	LHRI_LNC1391	1	222568490	222568827	-	1:222568490-222568827:-	TAF1A	NA	M2,M1,M0,	NA	NA	1	338	TAF1A-AS1	TAF1A-AS1:8	i	NONHSAG057249.1	NONHSAT150608.1	i	-	-	u
MK280642	LHRI_LNC1584.1	LHRI_LNC1584	9	137128340	137129385	-	9:137128340-137129385:-	NA	M0,M1,	NA	NA	Promoter Flanking Region,	1	1046	lnc-DPP7-2	lnc-DPP7-2:1	e	NONHSAG053848.2	NONHSAT221506.1	c	-	-	u
MN298107	LHRI_LNC951.31	LHRI_LNC951	4	40586544	40597252	-	4:40586544-40597252:-	RBM47	NA	M1,M0,M2,	NA	Open chromatin,	3	2277	lnc-APBB2-3	lnc-APBB2-3:1	i	NONHSAG037813.2	NONHSAT199898.1	i	-	-	u
MN297704	LHRI_LNC516.1	LHRI_LNC516	2	112005833	112006174	-	2:112005833-112006174:-	MERTK	NA	M1,M0,M2,	M0,	Promoter Flanking Region,Enhancer,	1	342	-	-	u	NONHSAG028939.1	NONHSAT073618.1	x	-	-	u
MN298555	LHRI_LNC1470.1	LHRI_LNC1470	9	5134495	5135164	+	9:5134495-5135164:+	INSL6	NA	M1,M0,M2,	NA	NA	1	670	lnc-INSL6-1	lnc-INSL6-1:1	i	NONHSAG051708.1	NONHSAT130092.1	i	-	-	u
MN296971	LHRI_LNC1721.1	LHRI_LNC1721	10	35335087	35335408	-	10:35335087-35335408:-	CCNY	M0,M1,	M1,M0,M2,	NA	Promoter,Promoter Flanking Region,	1	322	lnc-CUL2-3	lnc-CUL2-3:6	c	NONHSAG005614.2	NONHSAT012735.2	i	AL117336.3	ENST00000605499.1	i	yes
MN297675	LHRI_LNC484.1	LHRI_LNC484	2	85414761	85416955	+	2:85414761-85416955:+	CAPG	M1,	M0,M2,	M0,M1,	Promoter,Promoter Flanking Region,Open chromatin,	2	1072	-	-	u	-	-	u	-	-	u		Yes
MN297124	LHRI_LNC1908.11	LHRI_LNC1908	12	6447830	6451512	-	12:6447830-6451512:-	CD27-AS1	M0,M1,	M2,M0,M1,	M0,M1,	Promoter,	4	551	CD27-AS1	CD27-AS1:3	j	NONHSAG010301.2	NONHSAT026072.2	j	CD27-AS1	ENST00000545339.5	j	yes
MN298581	LHRI_LNC1499.1	LHRI_LNC1499	9	37905074	37905552	+	9:37905074-37905552:+	AL138752.2	M1,M0,	M0,M2,	NA	Promoter,	1	479	lnc-DCAF10-2	lnc-DCAF10-2:4	c	NONHSAG052187.1	NONHSAT131125.1	c	-	-	u
MN297359	LHRI_LNC96.1	LHRI_LNC96	16	22606771	22607781	+	16:22606771-22607781:+	NA	NA	M2,M0,	M1,M2,M0,	Enhancer,	1	1011	-	-	u	-	-	u	-	-	u		Yes
MN297411	LHRI_LNC171.1	LHRI_LNC171	17	7250783	7251272	+	17:7250783-7251272:+	CTDNEP1	M1,M0,	M2,M1,M0,	M1,M0,	Promoter,	1	490	-	-	u	NONHSAG020704.1	NONHSAT145370.1	c	-	-	u
MK280535	LHRI_LNC1270.9	LHRI_LNC1270	7	38339975	38341268	-	7:38339975-38341268:-	TRGV6	NA	M1,M0,	NA	CTCF Binding Site,Promoter Flanking Region,	2	1175	lnc-AMPH-6	lnc-AMPH-6:2	j	NONHSAG047376.2	NONHSAT211959.1	x	-	-	u
MN297819	LHRI_LNC656.8	LHRI_LNC656	20	40695320	40889439	-	20:40695320-40889439:-	AL035665.1,RNA5SP484,NA	NA	NA	NA	Promoter Flanking Region,	8	3803	lnc-MAFB-1	lnc-MAFB-1:1	j	NONHSAG031780.2	NONHSAT079742.2	j	AL035665.1	ENST00000428495.2	j	yes
MN298427	LHRI_LNC1322.1	LHRI_LNC1322	7	102520528	102595398	+	7:102520528-102595398:+	RASA4	NA	M2,	NA	Promoter,Open chromatin,	2	639	lnc-UPK3BL2-1	lnc-UPK3BL2-1:6	x	NONHSAG097233.1	NONHSAT213779.1	x	AC105052.4	ENST00000639209.1	x	yes
MN298267	LHRI_LNC1135.1	LHRI_LNC1135	6	6871613	6890483	-	6:6871613-6890483:-	NA	NA	M2,	M0,	Promoter Flanking Region,	3	1958	lnc-RREB1-9	lnc-RREB1-9:1	x	NONHSAG093933.1	NONHSAT208692.1	j	-	-	u
MK280552	LHRI_LNC1296.3	LHRI_LNC1296	7	77421194	77425463	+	7:77421194-77425463:+	AC004921.1	NA	NA	M0,	Promoter Flanking Region,	5	700	lnc-CCDC146-96	lnc-CCDC146-96:4	j	NONHSAG096453.1	NONHSAT212270.1	j	AC004921.1	ENST00000608884.1	j	Yes?
MN297685	LHRI_LNC494.2	LHRI_LNC494	2	96058327	96063804	+	2:96058327-96063804:+	NA	NA	NA	NA	CTCF Binding Site,	3	2296	-	-	u	-	-	u	-	-	u		Yes
MN296968	LHRI_LNC1716.1	LHRI_LNC1716	10	32894814	32895317	-	10:32894814-32895317:-	NA	NA	M0,M1,M2,	NA	NA	1	504	-	-	u	-	-	u	-	-	u		Yes
MN298274	LHRI_LNC1143.1	LHRI_LNC1143	6	26055828	26056099	+	6:26055828-26056099:+	HIST1H1C	M0,	NA	NA	Promoter,Enhancer,	1	272	-	-	u	-	-	u	-	-	u		Yes
MN297328	LHRI_LNC59.1	LHRI_LNC59	15	99356917	99357487	+	15:99356917-99357487:+	LRRC28	NA	M2,M0,M1,	NA	NA	1	571	-	-	u	NONHSAG018067.2	NONHSAT171311.1	i	-	-	u
MN298712	LHRI_LNC1668.1	LHRI_LNC1668	X	104119576	104123220	-	X:104119576-104123220:-	SLC25A53	NA	M0,M1,M2,	NA	NA	1	3645	lnc-H2BFWT-18	lnc-H2BFWT-18:2	o	NONHSAG055055.2	NONHSAT138089.2	o	-	-	u
MK280659	LHRI_LNC1648.1	LHRI_LNC1648	X	71419423	71419630	-	X:71419423-71419630:-	TAF1	NA	M2,M1,M0,	NA	NA	1	208	lnc-ZMYM3-4	lnc-ZMYM3-4:1	p	NONHSAG054729.2	NONHSAT137452.2	p	-	-	u
MK280546	LHRI_LNC1283.1	LHRI_LNC1283	7	64313706	64314413	-	7:64313706-64314413:-	ZNF736	M1,M0,	M1,M0,M2,	M1,M0,	Promoter,	1	708	lnc-ZNF736-3	lnc-ZNF736-3:2	x	NONHSAG047792.1	NONHSAT121044.1	i	-	-	u
MK280026	LHRI_LNC1732.1	LHRI_LNC1732	10	46008675	46008927	+	10:46008675-46008927:+	NCOA4	NA	M2,M1,M0,	NA	Open chromatin,	1	253	-	-	u	NONHSAG005887.2	NONHSAT156969.1	i	-	-	u
MK280001	LHRI_LNC1911.1	LHRI_LNC1911	12	7963621	7964309	-	12:7963621-7964309:-	NA	NA	M1,M2,	NA	Promoter Flanking Region,Open chromatin,TF binding site,	1	689	lnc-SLC2A3-4	lnc-SLC2A3-4:1	c	-	-	u	-	-	u
MN298043	LHRI_LNC871.6	LHRI_LNC871	3	139389876	139444726	+	3:139389876-139444726:+	AC097103.2	M1,M0,	M1,	NA	Promoter,	4	1028	lnc-MRPS22-1	lnc-MRPS22-1:24	j	NONHSAG036212.2	NONHSAT092366.2	j	AC097103.2	ENST00000515247.5	j	yes
MN296771	LHRI_LNC289.26	LHRI_LNC289	1	185045	193978	-	1:185045-193978:-	MIR6859-1,MIR6859-2	NA	M2,M0,M1,	NA	Open chromatin,Promoter Flanking Region,	8	6713	LINC00115	LINC00115:24	i	NONHSAG000008.1	NONHSAT000018.1	i	-	-	u
MN297087	LHRI_LNC1859.2	LHRI_LNC1859	11	72162957	72209257	-	11:72162957-72209257:-	AP000812.1	NA	M2,M1,M0,	NA	Promoter Flanking Region,CTCF Binding Site,	4	762	lnc-PHOX2A-3	lnc-PHOX2A-3:1	j	NONHSAG008973.2	NONHSAT022760.2	j	AP000812.1	ENST00000378140.3	j	yes
MN296980	LHRI_LNC1735.1	LHRI_LNC1735	10	50655956	50656169	-	10:50655956-50656169:-	BEND3P1	NA	NA	NA	Enhancer,	1	214	lnc-SGMS1-4	lnc-SGMS1-4:1	c	NONHSAG005866.1	NONHSAT013304.1	i	-	-	u
MN298460	LHRI_LNC1357.1	LHRI_LNC1357	7	149066003	149066223	-	7:149066003-149066223:-	NA	M1,M0,	M2,M0,M1,	M0,M1,	Promoter Flanking Region,	1	221	lnc-ZNF398-6	lnc-ZNF398-6:1	x	-	-	u	-	-	u
MN298010	LHRI_LNC833.3	LHRI_LNC833	3	75421566	75434957	-	3:75421566-75434957:-	FAM86DP	M0,M1,	M2,M0,M1,	NA	Promoter,	6	1934	lnc-ZNF717-4	lnc-ZNF717-4:2	j	NONHSAG035446.2	NONHSAT090525.2	j	-	-	u
MN298525	LHRI_LNC1434.4	LHRI_LNC1434	8	103080238	103140606	+	8:103080238-103140606:+	LINC01181	NA	NA	M1,M0,	Promoter Flanking Region,	7	2351	LINC01181	LINC01181:3	j	NONHSAG050978.2	NONHSAT128155.2	j	LINC01181	ENST00000503718.2	j	yes
MK280254	LHRI_LNC287.1	LHRI_LNC287	18	12305599	12308112	-	18:12305599-12308112:-	TUBB6	M1,M0,	M2,M1,M0,	M1,	Promoter,	1	2514	lnc-AFG3L2-4	lnc-AFG3L2-4:3	k	-	-	u	-	-	u
MN298361	LHRI_LNC1235.5	LHRI_LNC1235	6	163645701	163661462	-	6:163645701-163661462:-	NA	NA	NA	M1,	Promoter Flanking Region,	2	277	lnc-QKI-7	lnc-QKI-7:1	i	NONHSAG093799.1	NONHSAT208406.1	x	-	-	u
MK280235	LHRI_LNC232.1	LHRI_LNC232	17	47397071	47398003	+	17:47397071-47398003:+	EFCAB13	NA	M2,M1,M0,	NA	CTCF Binding Site,	1	933	-	-	u	-	-	u	-	-	u		Yes
MN297100	LHRI_LNC1882.3	LHRI_LNC1882	11	110371785	110375482	-	11:110371785-110375482:-	AP000924.1	NA	NA	M1,M0,	Promoter Flanking Region,	2	520	lnc-FDX1-1	lnc-FDX1-1:1	i	NONHSAG009576.2	NONHSAT024072.2	i	AP000924.1	ENST00000526605.5	i	Yes?
MN298621	LHRI_LNC1524.5	LHRI_LNC1524	9	72305517	72343210	+	9:72305517-72343210:+	LINC01504	M0,	M2,	M1,M0,	Promoter,	5	2267	LINC01504	LINC01504:4	j	NONHSAG052554.2	NONHSAT131858.2	j	LINC01504	ENST00000436054.1	j	yes
MN298551	LHRI_LNC1465.1	LHRI_LNC1465	8	144144405	144144730	+	8:144144405-144144730:+	NA	NA	M2,M1,M0,	NA	NA	1	326	lnc-MROH1-1	lnc-MROH1-1:1	c	-	-	u	-	-	u
MN298322	LHRI_LNC1208.1	LHRI_LNC1208	6	127289922	127290168	+	6:127289922-127290168:+	ECHDC1	NA	M2,M0,M1,	NA	NA	1	247	lnc-KIAA0408-4	lnc-KIAA0408-4:1	x	NONHSAG044781.1	NONHSAT114827.1	i	-	-	u
MN297421	LHRI_LNC183.1	LHRI_LNC183	17	18003989	18004410	-	17:18003989-18004410:-	DRC3	NA	M0,M1,M2,	NA	CTCF Binding Site,Open chromatin,	1	422	lnc-TOM1L2-8	lnc-TOM1L2-8:1	c	NONHSAG021033.2	NONHSAT146130.2	c	-	-	u
MK280136	LHRI_LNC2050.1	LHRI_LNC2050	14	22846833	22847044	-	14:22846833-22847044:-	MMP14	NA	M1,M0,M2,	M1,	NA	1	212	-	-	u	NONHSAG014436.1	NONHSAT035711.1	x	-	-	u
MN296796	LHRI_LNC1808.1	LHRI_LNC1808	1	21466230	21466734	+	1:21466230-21466734:+	NBPF3	NA	M1,M0,M2,	NA	CTCF Binding Site,	1	505	-	-	u	-	-	u	-	-	u		Yes
MN297920	LHRI_LNC740.1	LHRI_LNC740	22	37805847	37806095	-	22:37805847-37806095:-	H1F0	M1,	NA	NA	Promoter,	1	249	lnc-ANKRD54-1	lnc-ANKRD54-1:1	c	NONHSAG083999.1	NONHSAT192908.1	c	-	-	u
MK280269	LHRI_LNC368.1	LHRI_LNC368	19	41768096	41768324	-	19:41768096-41768324:-	CEACAM6	NA	M2,M1,	NA	NA	1	229	lnc-LYPD4-3	lnc-LYPD4-3:1	i	NONHSAG076151.1	NONHSAT179760.1	x	AC243967.2	ENST00000601409.1	i	yes
MN297489	LHRI_LNC242.1	LHRI_LNC242	17	58285508	58292315	+	17:58285508-58292315:+	NA	NA	NA	NA	Promoter Flanking Region,	2	1261	-	-	u	NONHSAG022382.1	NONHSAT055084.1	x	-	-	u
MN298223	LHRI_LNC1097.1	LHRI_LNC1097	5	141997137	141997368	+	5:141997137-141997368:+	GNPDA1	NA	M2,M1,M0,	NA	NA	1	232	-	-	u	NONHSAG041803.1	NONHSAT104317.1	x	-	-	u
MN296964	LHRI_LNC1712.1	LHRI_LNC1712	10	29484804	29485012	+	10:29484804-29485012:+	SVIL	NA	M1,M0,M2,	NA	Promoter Flanking Region,	1	209	lnc-LYZL1-15	lnc-LYZL1-15:15	p	NONHSAG005499.2	NONHSAT012519.2	i	-	-	u
MN297612	LHRI_LNC400.1	LHRI_LNC400	19	54223470	54224023	+	19:54223470-54224023:+	LILRB3	M1,	M0,M1,M2,	M1,M0,	Promoter Flanking Region,	1	554	-	-	u	-	-	u	-	-	u		Yes
MN298293	LHRI_LNC1165.1	LHRI_LNC1165	6	32864090	32864853	+	6:32864090-32864853:+	NA	NA	M0,M1,M2,	NA	Promoter Flanking Region,	1	764	-	-	u	NONHSAG043577.1	NONHSAT108944.1	i	-	-	u
MN296845	LHRI_LNC364.1	LHRI_LNC364	1	111435757	111436384	-	1:111435757-111436384:-	NA	NA	M2,M0,M1,	NA	Open chromatin,	1	628	-	-	u	-	-	u	-	-	u		Yes
MN297835	LHRI_LNC669.1	LHRI_LNC669	20	62506136	62506513	+	20:62506136-62506513:+	NA	NA	M0,M1,M2,	NA	Open chromatin,TF binding site,	1	378	-	-	u	NONHSAG032313.1	NONHSAT080950.1	i	-	-	u
MN297373	LHRI_LNC119.1	LHRI_LNC119	16	50605439	50605809	-	16:50605439-50605809:-	NKD1	NA	M2,M1,M0,	NA	Enhancer,	1	371	lnc-SNX20-8	lnc-SNX20-8:5	c	NONHSAG019418.1	NONHSAT142413.1	x	AC007608.1	ENST00000379963.1	p	yes
MN298396	LHRI_LNC1279.1	LHRI_LNC1279	7	48088007	48088303	-	7:48088007-48088303:-	NA	M1,M0,	M2,M0,M1,	M0,M1,	Promoter,	1	297	lnc-SUN3-1	lnc-SUN3-1:2	c	-	-	u	-	-	u
MN298437	LHRI_LNC1329.1	LHRI_LNC1329	7	115919604	115919821	-	7:115919604-115919821:-	NA	NA	M2,	NA	NA	1	218	-	-	u	NONHSAG048603.1	NONHSAT122863.1	i	-	-	u
MN296910	LHRI_LNC1202.1	LHRI_LNC1202	1	202253828	202254104	+	1:202253828-202254104:+	LGR6	NA	NA	NA	NA	1	277	-	-	u	NONHSAG003956.1	NONHSAT008807.1	i	-	-	u
MN298469	LHRI_LNC1372.1	LHRI_LNC1372	7	158705221	158705568	+	7:158705221-158705568:+	NA	M0,M1,	M0,M1,M2,	M1,M0,	CTCF Binding Site,Promoter,	1	348	lnc-WDR60-14	lnc-WDR60-14:1	e	NONHSAG096861.1	NONHSAT213021.1	i	-	-	u
MK280670	LHRI_LNC1670.1	LHRI_LNC1670	X	109732516	109733358	+	X:109732516-109733358:+	ACSL4	M0,	M1,M0,M2,	M0,M1,	Promoter,	1	843	lnc-KCNE5-3	lnc-KCNE5-3:1	x	NONHSAG055102.1	NONHSAT138171.1	i	-	-	u
MK280248	LHRI_LNC260.1	LHRI_LNC260	17	74532366	74535227	+	17:74532366-74535227:+	NA	M0,	M1,M0,M2,	M0,	Promoter Flanking Region,CTCF Binding Site,	2	829	lnc-CD300C-1	lnc-CD300C-1:1	x	NONHSAG022701.2	NONHSAT055793.2	x	-	-	u
MN298682	LHRI_LNC1618.1	LHRI_LNC1618	X	2211490	2212829	-	X:2211490-2212829:-	NA	NA	M1,M2,	NA	CTCF Binding Site,	1	1340	-	-	u	-	-	u	-	-	u		Yes
MN297966	LHRI_LNC788.1	LHRI_LNC788	3	36939261	36939625	-	3:36939261-36939625:-	TRANK1	NA	M1,M0,M2,	NA	Open chromatin,	1	365	lnc-EPM2AIP1-1	lnc-EPM2AIP1-1:2	i	NONHSAG034758.2	NONHSAT088987.2	i	-	-	u
MN297225	LHRI_LNC2043.1	LHRI_LNC2043	14	20625381	20625684	+	14:20625381-20625684:+	NA	NA	NA	NA	Promoter Flanking Region,	1	304	lnc-RNASE4-2	lnc-RNASE4-2:1	c	-	-	u	-	-	u
MN297587	LHRI_LNC361.2	LHRI_LNC361	19	36573377	36580263	+	19:36573377-36580263:+	ZNF529-AS1	M1,M0,	M1,M0,M2,	NA	Promoter,	4	453	ZNF529-AS1	ZNF529-AS1:21	j	NONHSAG025656.2	NONHSAT066012.2	j	ZNF529-AS1	ENST00000475219.6	j	yes
MN298560	LHRI_LNC1475.1	LHRI_LNC1475	9	5781002	5781948	-	9:5781002-5781948:-	ERMP1	NA	M0,M1,M2,	NA	TF binding site,	1	947	-	-	u	-	-	u	-	-	u		Yes
MN297601	LHRI_LNC382.1	LHRI_LNC382	19	48929729	48930194	-	19:48929729-48930194:-	NA	NA	M2,M0,	NA	Enhancer,Promoter Flanking Region,	1	466	-	-	u	NONHSAG026200.2	NONHSAT180511.1	i	-	-	u
MN297120	LHRI_LNC1904.1	LHRI_LNC1904	12	6142995	6143400	+	12:6142995-6143400:+	NA	NA	M0,M1,M2,	M0,	Promoter Flanking Region,	1	406	lnc-CD9-6	lnc-CD9-6:1	i	NONHSAG010277.2	NONHSAT026023.2	i	-	-	u
MN297094	LHRI_LNC1871.1	LHRI_LNC1871	11	83258427	83258644	-	11:83258427-83258644:-	ANKRD42	NA	M2,M0,M1,	NA	Open chromatin,	1	218	-	-	u	-	-	u	-	-	u		Yes
MN297707	LHRI_LNC520.18	LHRI_LNC520	2	113235692	113273699	+	2:113235692-113273699:+	PAX8-AS1	NA	M2,M1,M0,	M1,	Promoter,Open chromatin,	8	2373	PAX8-AS1	PAX8-AS1:29	j	NONHSAG029003.2	NONHSAT073769.2	j	PAX8-AS1	ENST00000436293.6	j	yes
MN298101	LHRI_LNC946.2	LHRI_LNC946	4	22726422	22727059	-	4:22726422-22727059:-	GBA3	NA	M0,M1,M2,	NA	NA	3	286	lnc-ADGRA3-7	lnc-ADGRA3-7:1	o	NONHSAG087447.1	NONHSAT198386.1	i	-	-	u
MK280446	LHRI_LNC970.1	LHRI_LNC970	4	86922029	86922925	-	4:86922029-86922925:-	AC093827.5	NA	M2,M1,M0,	NA	Enhancer,Open chromatin,	1	897	AFF1-AS1	AFF1-AS1:14	o	NONHSAG038373.2	NONHSAT097289.2	o	AC093827.4	ENST00000508280.6	p	yes
MN297684	LHRI_LNC493.1	LHRI_LNC493	2	95883692	95883982	-	2:95883692-95883982:-	ANKRD36C	NA	M0,M1,M2,	NA	NA	1	291	-	-	u	-	-	u	-	-	u		Yes
MN297772	LHRI_LNC603.1	LHRI_LNC603	2	234496839	234497050	+	2:234496839-234497050:+	ARL4C	M1,M0,	NA	NA	Promoter,	1	212	-	-	u	NONHSAG078267.1	NONHSAT183780.1	e	-	-	u
MN297387	LHRI_LNC142.1	LHRI_LNC142	16	73053234	73053559	-	16:73053234-73053559:-	ZFHX3	NA	M2,	NA	Promoter,	1	326	-	-	u	-	-	u	-	-	u		Yes
MN298700	LHRI_LNC1651.1	LHRI_LNC1651	X	76114333	76152591	-	X:76114333-76152591:-	NA	NA	NA	NA	Promoter Flanking Region,	3	633	lnc-MAGEE2-1	lnc-MAGEE2-1:3	y	NONHSAG054830.1	NONHSAT137681.1	i	-	-	u
MN297914	LHRI_LNC730.1	LHRI_LNC730	22	30629545	30630891	+	22:30629545-30630891:+	NA	NA	M2,M1,	NA	CTCF Binding Site,	1	1347	-	-	u	-	-	u	-	-	u		Yes
MN298412	LHRI_LNC1294.5	LHRI_LNC1294	7	74883795	74890558	-	7:74883795-74890558:-	STAG3L2	M0,M1,	M0,M1,M2,	NA	Promoter,	6	586	-	-	u	NONHSAG047973.2	NONHSAT213617.1	c	-	-	u
MN297556	LHRI_LNC319.1	LHRI_LNC319	19	8514258	8514706	+	19:8514258-8514706:+	NA	NA	M2,M1,M0,	M1,M0,	Promoter,	1	449	lnc-HNRNPM-6	lnc-HNRNPM-6:1	c	NONHSAG024681.1	NONHSAT060873.1	i	-	-	u
MK280053	LHRI_LNC1836.14	LHRI_LNC1836	11	62852297	62855812	-	11:62852297-62855812:-	SNHG1,SNORD25,SNORD27	M0,M1,	M0,M1,M2,	NA	Promoter,	9	1567	SNHG1	SNHG1:3	j	NONHSAG008552.2	NONHSAT021826.2	j	SNHG1	ENST00000541578.5	j	Yes
MN296950	LHRI_LNC1672.1	LHRI_LNC1672	10	4121132	4121371	-	10:4121132-4121371:-	NA	NA	NA	M1,M0,	Enhancer,Promoter Flanking Region,	1	240	lnc-KLF6-23	lnc-KLF6-23:1	c	NONHSAG005058.1	NONHSAT011078.1	i	-	-	u
MN297435	LHRI_LNC200.1	LHRI_LNC200	17	30969811	30971126	-	17:30969811-30971126:-	RNF135	M0,M1,	M1,M0,M2,	M0,M1,	Promoter,	1	1316	lnc-TEFM-11	lnc-TEFM-11:1	k	NONHSAG021404.2	NONHSAT052801.2	i	-	-	u
MN297993	LHRI_LNC815.1	LHRI_LNC815	3	50340918	50347658	+	3:50340918-50347658:+	ZMYND10-AS1	M0,	NA	M0,	Promoter,Open chromatin,	4	764	lnc-ZMYND10-2	lnc-ZMYND10-2:1	x	NONHSAG035124.2	NONHSAT089829.2	o	ZMYND10-AS1	ENST00000440013.1	o	yes
MN297970	LHRI_LNC792.1	LHRI_LNC792	3	40293502	40293808	-	3:40293502-40293808:-	EIF1B-AS1	NA	M1,M2,	NA	NA	1	307	EIF1B-AS1	EIF1B-AS1:18	c	NONHSAG034824.2	NONHSAT195608.1	i	EIF1B-AS1	ENST00000631175.2	i	Yes?
MN296829	LHRI_LNC276.21	LHRI_LNC276	1	93264677	93338534	-	1:93264677-93338534:-	CCDC18-AS1	NA	M2,M1,M0,	NA	Promoter Flanking Region,	8	1875	CCDC18-AS1	CCDC18-AS1:46	j	NONHSAG002086.2	NONHSAT004496.2	j	CCDC18-AS1	ENST00000451302.6	j	yes
MK280388	LHRI_LNC1855.1	LHRI_LNC1855	11	69045986	69046209	-	11:69045986-69046209:-	NA	NA	M1,M2,	NA	CTCF Binding Site,Promoter Flanking Region,Promoter,	1	224	-	-	u	-	-	u	-	-	u		Yes
MN297827	LHRI_LNC656.21	LHRI_LNC656	20	40877259	40889436	-	20:40877259-40889436:-	AL035665.1,RNA5SP484,NA	NA	NA	NA	Promoter Flanking Region,	3	1148	lnc-MAFB-3	lnc-MAFB-3:1	y	NONHSAG081962.1	NONHSAT189677.1	j	-	-	u
MN298620	LHRI_LNC1524.4	LHRI_LNC1524	9	72305517	72333358	+	9:72305517-72333358:+	LINC01504	M0,	M2,	M1,M0,	Promoter,	4	311	LINC01504	LINC01504:4	j	NONHSAG052554.2	NONHSAT131858.2	j	LINC01504	ENST00000436054.1	j	yes
MN298167	LHRI_LNC1028.2	LHRI_LNC1028	5	36699354	36723708	-	5:36699354-36723708:-	AC008957.1	NA	NA	M0,	Promoter Flanking Region,	3	3826	lnc-RANBP3L-4	lnc-RANBP3L-4:5	k	NONHSAG040193.1	NONHSAT101041.1	k	AC008957.1	ENST00000512329.1	j	Yes?
MN297537	LHRI_LNC294.4	LHRI_LNC294	18	57630357	57738640	+	18:57630357-57738640:+	AC027097.2	M1,M0,	M2,M0,	NA	Promoter,Open chromatin,CTCF Binding Site,	6	2658	lnc-ONECUT2-5	lnc-ONECUT2-5:1	j	NONHSAG023939.2	NONHSAT059462.2	j	AC027097.2	ENST00000588925.5	j	yes
MN298498	LHRI_LNC1397.6	LHRI_LNC1397	8	54162095	54173508	+	8:54162095-54173508:+	AC060764.1,NA	NA	NA	NA	NA	2	1331	-	-	u	NONHSAG098825.1	NONHSAT215800.1	o	-	-	u
MN297137	LHRI_LNC1918.1	LHRI_LNC1918	12	12483446	12483893	+	12:12483446-12483893:+	DUSP16	NA	M2,M0,M1,	NA	Promoter Flanking Region,Open chromatin,	1	448	lnc-MANSC1-2	lnc-MANSC1-2:2	i	-	-	u	-	-	u
MN297834	LHRI_LNC666.1	LHRI_LNC666	20	53874615	53875059	-	20:53874615-53875059:-	SUMO1P1	NA	NA	NA	Promoter Flanking Region,	1	445	-	-	u	-	-	u	-	-	u		Yes
MN298719	LHRI_LNC1679.1	LHRI_LNC1679	X	134772445	134773144	-	X:134772445-134773144:-	FAM122B	NA	M2,M0,M1,	NA	NA	1	700	lnc-PLAC1-3	lnc-PLAC1-3:1	i	NONHSAG055357.2	NONHSAT223580.1	i	-	-	u
MN297308	LHRI_LNC2132.1	LHRI_LNC2132	15	68819170	68819855	+	15:68819170-68819855:+	ANP32A	M1,M0,	NA	M1,M2,M0,	Promoter,	1	686	-	-	u	NONHSAG070412.1	NONHSAT170945.1	e	-	-	u
MK280111	LHRI_LNC1958.13	LHRI_LNC1958	12	55830843	55836246	+	12:55830843-55836246:+	TMEM198B	M0,M1,	M0,M2,	NA	Promoter,	4	3412	lnc-ORMDL2-1	lnc-ORMDL2-1:1	j	NONHSAG011325.2	NONHSAT028687.2	j	-	-	u
MN297050	LHRI_LNC1830.1	LHRI_LNC1830	11	62410332	62411506	-	11:62410332-62411506:-	SCGB1A1	NA	NA	NA	NA	2	607	lnc-AHNAK-1	lnc-AHNAK-1:2	j	NONHSAG008513.2	NONHSAT021748.2	o	-	-	u
MN297752	LHRI_LNC579.1	LHRI_LNC579	2	197302541	197302982	-	2:197302541-197302982:-	ANKRD44	NA	M0,M1,M2,	NA	NA	1	442	-	-	u	-	-	u	-	-	u		Yes
MN297895	LHRI_LNC703.2	LHRI_LNC703	21	42530194	42534703	-	21:42530194-42534703:-	SLC37A1	NA	M2,M0,M1,	NA	Promoter Flanking Region,TF binding site,	2	864	lnc-RSPH1-7	lnc-RSPH1-7:3	c	-	-	u	-	-	u
MN297617	LHRI_LNC404.1	LHRI_LNC404	19	55043625	55043916	+	19:55043625-55043916:+	RDH13	NA	M0,M1,M2,	NA	Promoter Flanking Region,	1	292	lnc-RDH13-12	lnc-RDH13-12:1	x	NONHSAG026530.1	NONHSAT067929.1	o	AC011476.2	ENST00000585492.1	x	yes
MN297008	LHRI_LNC1779.1	LHRI_LNC1779	10	104270550	104271118	+	10:104270550-104271118:+	GSTO2	NA	M1,M0,M2,	NA	Promoter,	1	569	-	-	u	-	-	u	-	-	u		Yes
MN297620	LHRI_LNC409.1	LHRI_LNC409	19	58097073	58097568	-	19:58097073-58097568:-	ZSCAN18	M1,	M2,	NA	Promoter,	1	496	-	-	u	NONHSAG026673.1	NONHSAT068253.1	i	-	-	u
MN297501	LHRI_LNC257.2	LHRI_LNC257	17	66454341	66463212	-	17:66454341-66463212:-	PRKCA	NA	M2,	NA	Promoter Flanking Region,	2	1264	lnc-APOH-3	lnc-APOH-3:1	j	NONHSAG022544.2	NONHSAT175498.1	i	-	-	u
MN298172	LHRI_LNC1032.1	LHRI_LNC1032	5	40899884	40900284	+	5:40899884-40900284:+	NA	NA	M2,	NA	NA	1	401	-	-	u	NONHSAG090155.1	NONHSAT202529.1	i	-	-	u
MN296835	LHRI_LNC317.1	LHRI_LNC317	1	108927225	108928748	-	1:108927225-108928748:-	GPSM2	NA	M2,M1,M0,	NA	NA	1	1524	lnc-WDR47-1	lnc-WDR47-1:1	p	NONHSAG002306.1	NONHSAT004985.1	i	-	-	u
MN297584	LHRI_LNC358.1	LHRI_LNC358	19	33373210	33373559	-	19:33373210-33373559:-	CEBPG	M0,M1,	M1,	M0,	Promoter,Open chromatin,	1	350	lnc-PEPD-3	lnc-PEPD-3:1	c	-	-	u	-	-	u
MN297347	LHRI_LNC81.1	LHRI_LNC81	16	3612580	3613239	+	16:3612580-3613239:+	DNASE1	M0,M1,	M2,M0,M1,	NA	Promoter,	1	660	lnc-CLUAP1-8	lnc-CLUAP1-8:2	i	NONHSAG018417.2	NONHSAT148061.2	i	-	-	u
MN297261	LHRI_LNC2076.1	LHRI_LNC2076	14	70578271	70578592	-	14:70578271-70578592:-	NA	NA	M0,M1,M2,	NA	NA	1	322	-	-	u	-	-	u	-	-	u		Yes
MN298559	LHRI_LNC1474.1	LHRI_LNC1474	9	5778592	5779515	-	9:5778592-5779515:-	ERMP1	NA	M2,M1,M0,	NA	TF binding site,	1	924	-	-	u	-	-	u	-	-	u		Yes
MK280045	LHRI_LNC1816.1	LHRI_LNC1816	11	35663244	35663759	-	11:35663244-35663759:-	TRIM44	M0,	M0,	M1,M0,	Promoter,	1	516	-	-	u	-	-	u	-	-	u		Yes
MN297279	LHRI_LNC2103.10	LHRI_LNC2103	15	30484544	30513700	+	15:30484544-30513700:+	AC127502.1,AC127502.3	NA	M1,M0,M2,	NA	Enhancer,Promoter Flanking Region,Open chromatin,	7	1417	lnc-GOLGA8Q-4	lnc-GOLGA8Q-4:3	j	NONHSAG016409.2	NONHSAT041358.2	j	AC127502.2	ENST00000602663.1	y	yes
MN297531	LHRI_LNC285.1	LHRI_LNC285	18	9136738	9137077	-	18:9136738-9137077:-	AP005263.1	M0,M1,	M1,M0,M2,	M0,M1,	Promoter,	1	340	NDUFV2-AS1	NDUFV2-AS1:13	c	-	-	u	AP005263.1	ENST00000579126.5	i	yes
MN298034	LHRI_LNC860.1	LHRI_LNC860	3	131379830	131380044	-	3:131379830-131380044:-	AC010210.1	M1,M0,	M1,M0,M2,	NA	Promoter,	1	215	lnc-MRPL3-2	lnc-MRPL3-2:6	o	NONHSAG036092.2	NONHSAT196268.1	i	AC010210.1	ENST00000502521.1	i	yes
MN298289	LHRI_LNC1157.1	LHRI_LNC1157	6	31198783	31199047	+	6:31198783-31199047:+	HCG27	M1,M0,	M2,M0,M1,	M0,	Promoter,	1	265	lnc-HLA-B-2	lnc-HLA-B-2:6	x	NONHSAG043461.2	NONHSAT207102.1	i	HCG27	ENST00000383331.4	i	yes
MN297967	LHRI_LNC789.1	LHRI_LNC789	3	38137436	38138040	+	3:38137436-38138040:+	NA	M0,M1,	M2,M1,M0,	M0,M1,	Promoter,	1	605	-	-	u	-	-	u	-	-	u		Yes
MN296872	LHRI_LNC657.1	LHRI_LNC657	1	150162380	150163234	-	1:150162380-150163234:-	PLEKHO1	NA	NA	M0,M1,	Promoter Flanking Region,	1	855	lnc-PLEKHO1-1	lnc-PLEKHO1-1:4	i	NONHSAG002841.2	NONHSAT006276.2	x	-	-	u
MN298364	LHRI_LNC1240.1	LHRI_LNC1240	6	166956683	166957096	+	6:166956683-166957096:+	RNASET2	M1,M0,	M2,M0,	M0,M1,	Promoter,	1	414	lnc-RNASET2-2	lnc-RNASET2-2:1	x	NONHSAG045401.2	NONHSAT116063.2	x	-	-	u
MK280634	LHRI_LNC1999.1	LHRI_LNC1999	12	118062018	118065770	+	12:118062018-118065770:+	VSIG10	M0,M1,	NA	M1,M0,	Promoter,	1	3753	lnc-RFC5-5	lnc-RFC5-5:7	k	NONHSAG065740.1	NONHSAT164065.1	i	-	-	u
MN297755	LHRI_LNC582.1	LHRI_LNC582	2	202375744	202376098	-	2:202375744-202376098:-	NA	M0,M1,	NA	M0,	Promoter,Open chromatin,	1	355	lnc-SUMO1-7	lnc-SUMO1-7:1	c	NONHSAG030278.2	NONHSAT076454.2	c	-	-	u
MN298647	LHRI_LNC1555.1	LHRI_LNC1555	9	114650277	114650742	+	9:114650277-114650742:+	NA	NA	M2,M0,M1,	NA	NA	1	466	-	-	u	-	-	u	-	-	u		Yes
MN297159	LHRI_LNC1960.1	LHRI_LNC1960	12	56308704	56309032	-	12:56308704-56309032:-	AC073896.2	NA	M2,M1,M0,	NA	NA	1	329	lnc-IL23A-2	lnc-IL23A-2:8	x	NONHSAG011375.2	NONHSAT028807.2	x	AC073896.3	ENST00000546789.1	x	yes
MN296903	LHRI_LNC1173.1	LHRI_LNC1173	1	198889594	198890879	-	1:198889594-198890879:-	MIR181A1HG	NA	M1,M0,	NA	Open chromatin,Enhancer,	1	1286	lnc-ATP6V1G3-4	lnc-ATP6V1G3-4:16	c	NONHSAG003880.1	NONHSAT008654.1	e	MIR181A1HG	ENST00000432296.1	i	yes
MN298208	LHRI_LNC1078.1	LHRI_LNC1078	5	116083183	116083407	-	5:116083183-116083407:-	AC034236.2	M0,M1,	M0,M1,M2,	M0,	Promoter,	1	225	lnc-ATG12-5	lnc-ATG12-5:1	p	NONHSAG041323.1	NONHSAT103377.1	i	AC034236.2	ENST00000606662.1	p	yes
MN297728	LHRI_LNC543.1	LHRI_LNC543	2	157877246	157877509	+	2:157877246-157877509:+	UPP2	M1,M0,	NA	M0,	Promoter,	1	264	lnc-UPP2-2	lnc-UPP2-2:6	c	NONHSAG029614.2	NONHSAT075073.2	c	-	-	u
MN297160	LHRI_LNC1961.1	LHRI_LNC1961	12	57085345	57085544	-	12:57085345-57085544:-	NEMP1	M0,	NA	M0,M1,	Promoter,	1	200	lnc-STAT6-1	lnc-STAT6-1:3	i	NONHSAG011408.2	NONHSAT162267.1	x	-	-	u
MN297194	LHRI_LNC1997.1	LHRI_LNC1997	12	116443031	116516249	+	12:116443031-116516249:+	NA	NA	M1,	M1,	Open chromatin,Promoter Flanking Region,Enhancer,	2	558	lnc-MAP1LC3B2-13	lnc-MAP1LC3B2-13:1	j	NONHSAG065065.1	NONHSAT162820.1	o	-	-	u
MN298521	LHRI_LNC1428.2	LHRI_LNC1428	8	96774930	96793406	-	8:96774930-96793406:-	CPQ	NA	M2,M0,	M1,	CTCF Binding Site,Enhancer,Open chromatin,	2	325	lnc-TSPYL5-6	lnc-TSPYL5-6:1	j	NONHSAG050825.2	NONHSAT127866.2	j	-	-	u
MN298593	LHRI_LNC1506.1	LHRI_LNC1506	9	42943449	42944572	+	9:42943449-42944572:+	NA	NA	M2,	NA	NA	2	204	-	-	u	-	-	u	-	-	u		Yes
MN298726	LHRI_LNC1688.8	LHRI_LNC1688	Y	3002998	3105106	+	Y:3002998-3105106:+	LINC00278	NA	NA	NA	NA	5	1523	LINC00278	LINC00278:3	j	NONHSAG055665.2	NONHSAT139305.2	j	LINC00278	ENST00000425031.1	j	yes
MN297795	LHRI_LNC629.1	LHRI_LNC629	20	17886049	17891504	-	20:17886049-17891504:-	AL035045.1	NA	M2,M1,M0,	NA	Open chromatin,CTCF Binding Site,	1	5456	lnc-SNX5-1	lnc-SNX5-1:1	e	NONHSAG031348.2	NONHSAT078774.2	e	AL035045.1	ENST00000425405.1	e	yes
MK280249	LHRI_LNC260.2	LHRI_LNC260	17	74532414	74535112	+	17:74532414-74535112:+	NA	M0,	M1,M0,M2,	M0,	CTCF Binding Site,Promoter Flanking Region,	2	646	lnc-CD300C-1	lnc-CD300C-1:1	x	NONHSAG022701.2	NONHSAT055793.2	x	-	-	u
MN298598	LHRI_LNC1516.1	LHRI_LNC1516	9	64495420	64496477	+	9:64495420-64496477:+	NA	NA	M2,M0,	NA	NA	1	1058	-	-	u	-	-	u	-	-	u		Yes
MN297027	LHRI_LNC1799.2	LHRI_LNC1799	11	4393836	4414830	+	11:4393836-4414830:+	NA	M1,M0,	M1,M0,	M0,	Promoter,	2	398	lnc-OR52K2-1	lnc-OR52K2-1:1	j	NONHSAG007491.2	NONHSAT017648.2	j	-	-	u
MN297994	LHRI_LNC816.1	LHRI_LNC816	3	50347964	50348224	+	3:50347964-50348224:+	NPRL2	NA	M2,M0,M1,	NA	Promoter,Promoter Flanking Region,Enhancer,	1	261	lnc-ZMYND10-2	lnc-ZMYND10-2:2	i	-	-	u	-	-	u
MN297363	LHRI_LNC102.1	LHRI_LNC102	16	28538860	28539074	+	16:28538860-28539074:+	NUPR1	NA	NA	NA	Promoter,TF binding site,	1	215	-	-	u	NONHSAG072087.1	NONHSAT173735.1	i	-	-	u
MN297562	LHRI_LNC325.7	LHRI_LNC325	19	12001139	12003595	+	19:12001139-12003595:+	ZNF433-AS1	NA	M2,M0,M1,	NA	TF binding site,	3	371	ZNF433-AS1	ZNF433-AS1:5	j	NONHSAG024864.2	NONHSAT061210.2	j	ZNF433-AS1	ENST00000476474.5	j	yes
MN298324	LHRI_LNC1209.3	LHRI_LNC1209	6	129502605	129558637	-	6:129502605-129558637:-	AL356124.1	NA	M1,M0,M2,	NA	CTCF Binding Site,	8	1527	lnc-ARHGAP18-1	lnc-ARHGAP18-1:3	j	NONHSAG044816.2	NONHSAT114882.2	j	AL356124.1	ENST00000430296.5	j	yes
MK280562	LHRI_LNC1344.3	LHRI_LNC1344	7	135980935	136243840	+	7:135980935-136243840:+	AC024084.1,AC078845.1	NA	NA	NA	Promoter Flanking Region,	7	2454	lnc-STMP1-8	lnc-STMP1-8:2	j	NONHSAG048891.2	NONHSAT123540.2	j	AC078845.1	ENST00000445293.6	j	yes
MK280253	LHRI_LNC282.1	LHRI_LNC282	18	3581372	3581673	+	18:3581372-3581673:+	DLGAP1	NA	M2,M0,M1,	NA	Enhancer,Open chromatin,	1	302	-	-	u	-	-	u	-	-	u		Yes
MN297582	LHRI_LNC349.7	LHRI_LNC349	19	27793523	27806782	+	19:27793523-27806782:+	AC006504.7	M1,M0,	M1,M0,M2,	M0,	Promoter,	3	1169	lnc-VSTM2B-9	lnc-VSTM2B-9:2	j	NONHSAG025378.2	NONHSAT063988.2	j	AC006504.7	ENST00000592806.1	j	yes
MN297823	LHRI_LNC656.16	LHRI_LNC656	20	40696499	40889450	-	20:40696499-40889450:-	AL035665.1,RNA5SP484,NA	NA	NA	NA	Promoter Flanking Region,	8	2698	lnc-MAFB-1	lnc-MAFB-1:1	j	NONHSAG031780.2	NONHSAT079742.2	j	AL035665.1	ENST00000428495.2	j	yes
MN297831	LHRI_LNC660.1	LHRI_LNC660	20	49914718	49915000	-	20:49914718-49915000:-	SPATA2	M1,M0,	M2,M1,M0,	M0,M1,	Promoter,	1	283	-	-	u	NONHSAG032023.1	NONHSAT080339.1	i	-	-	u
MN297148	LHRI_LNC1943.4	LHRI_LNC1943	12	47719158	47729203	+	12:47719158-47729203:+	AC004241.1	NA	M2,M1,M0,	NA	Promoter Flanking Region,	3	527	lnc-SLC48A1-23	lnc-SLC48A1-23:2	c	NONHSAG011015.2	NONHSAT027933.2	j	AC004241.1	ENST00000547799.5	j	yes
MN298042	LHRI_LNC870.1	LHRI_LNC870	3	139353796	139354647	-	3:139353796-139354647:-	MRPS22	NA	M1,M0,M2,	NA	Open chromatin,	1	852	-	-	u	NONHSAG036219.1	NONHSAT092383.1	i	-	-	u
MN296907	LHRI_LNC1179.1	LHRI_LNC1179	1	200398880	200399992	-	1:200398880-200399992:-	AC104461.1	NA	M0,M1,M2,	NA	NA	1	1113	lnc-NR5A2-1	lnc-NR5A2-1:8	x	NONHSAG003900.1	NONHSAT008694.1	i	AC104461.1	ENST00000637430.1	x	yes
MN298207	LHRI_LNC1077.1	LHRI_LNC1077	5	108727912	108728546	+	5:108727912-108728546:+	LINC01023	M0,	NA	M0,M1,	Promoter,	1	635	lnc-FER-1	lnc-FER-1:1	e	NONHSAG041200.2	NONHSAT203015.1	e	LINC01023	ENST00000606054.1	x	yes
MN297051	LHRI_LNC1831.1	LHRI_LNC1831	11	62420069	62420311	-	11:62420069-62420311:-	SCGB1A1	NA	M2,	NA	Open chromatin,Enhancer,	1	243	lnc-AHNAK-1	lnc-AHNAK-1:2	i	NONHSAG008514.2	NONHSAT021749.2	p	AP003064.2	ENST00000528983.1	p	yes
MN297976	LHRI_LNC799.1	LHRI_LNC799	3	44663162	44663465	+	3:44663162-44663465:+	AC099669.1	NA	M0,M1,M2,	NA	NA	1	304	lnc-ZNF852-2	lnc-ZNF852-2:1	i	NONHSAG034916.2	NONHSAT089332.2	i	ZKSCAN7-AS1	ENST00000457331.1	i	yes
MN297179	LHRI_LNC1981.1	LHRI_LNC1981	12	95308672	95308896	+	12:95308672-95308896:+	MIR331	NA	M1,M0,M2,	NA	NA	1	225	lnc-VEZT-2	lnc-VEZT-2:2	c	NONHSAG011964.2	NONHSAT030018.2	c	-	-	u
MN298215	LHRI_LNC1086.1	LHRI_LNC1086	5	133050331	133051930	-	5:133050331-133051930:-	NA	M1,M0,	M2,M0,M1,	M1,M0,	Promoter,	1	1600	lnc-ZCCHC10-3	lnc-ZCCHC10-3:1	k	NONHSAG041551.2	NONHSAT103802.2	k	-	-	u
MK280411	LHRI_LNC819.1	LHRI_LNC819	3	51309400	51309619	-	3:51309400-51309619:-	DOCK3	NA	M2,M1,M0,	NA	CTCF Binding Site,	1	220	-	-	u	-	-	u	-	-	u		Yes
MN297136	LHRI_LNC1917.1	LHRI_LNC1917	12	12479974	12480542	+	12:12479974-12480542:+	DUSP16	NA	M1,M0,M2,	NA	NA	1	569	lnc-MANSC1-2	lnc-MANSC1-2:2	i	NONHSAG010524.2	NONHSAT026982.2	p	-	-	u
MK279998	LHRI_LNC1570.1	LHRI_LNC1570	1	244658629	244666890	-	1:244658629-244666890:-	DESI2	NA	M0,M1,M2,	NA	Promoter Flanking Region,	2	2072	-	-	u	NONHSAG004859.1	NONHSAT010641.1	i	-	-	u
MN298483	LHRI_LNC1379.1	LHRI_LNC1379	8	17806048	17806712	+	8:17806048-17806712:+	AC027117.2	NA	M2,M0,	NA	Promoter Flanking Region,Enhancer,	1	665	lnc-PCM1-4	lnc-PCM1-4:13	c	NONHSAG049649.1	NONHSAT125308.1	i	AC027117.2	ENST00000522768.1	i	yes
MN297648	LHRI_LNC442.1	LHRI_LNC442	2	38140255	38141678	-	2:38140255-38141678:-	CYP1B1-AS1	NA	M0,	NA	NA	2	442	lnc-CYP1B1-1	lnc-CYP1B1-1:3	j	NONHSAG027504.2	NONHSAT181599.1	i	CYP1B1-AS1	ENST00000628135.3	i	yes
MN298400	LHRI_LNC1285.2	LHRI_LNC1285	7	65726779	65750926	-	7:65726779-65750926:-	AC073107.1	M1,M0,	M2,M1,M0,	NA	Promoter,	4	514	lnc-ERV3-1-10	lnc-ERV3-1-10:10	c	NONHSAG047815.2	NONHSAT121101.2	c	-	-	u
MN298714	LHRI_LNC1676.4	LHRI_LNC1676	X	131711661	131794456	-	X:131711661-131794456:-	FIRRE	NA	M2,M1,M0,	NA	Promoter Flanking Region,	9	1146	FIRRE	FIRRE:2	c	NONHSAG055315.2	NONHSAT138541.2	c	FIRRE	ENST00000427391.2	j	yes
MN297164	LHRI_LNC1968.3	LHRI_LNC1968	12	67354528	67456732	+	12:67354528-67456732:+	LINC02420,LINC02408	NA	NA	NA	CTCF Binding Site,Promoter Flanking Region,Enhancer,	6	3025	lnc-CAND1-1	lnc-CAND1-1:1	j	NONHSAG011586.2	NONHSAT029250.2	j	LINC02408	ENST00000650195.1	j	yes
MN297303	LHRI_LNC2128.1	LHRI_LNC2128	15	65837433	65837744	-	15:65837433-65837744:-	RAB11A	NA	M1,	NA	CTCF Binding Site,TF binding site,Enhancer,Promoter Flanking Region,	2	214	lnc-SLC24A1-1	lnc-SLC24A1-1:2	i	NONHSAG017196.1	NONHSAT046745.1	i	-	-	u
MK280377	LHRI_LNC713.1	LHRI_LNC713	22	18360564	18361185	+	22:18360564-18361185:+	NA	NA	M2,	NA	NA	1	622	lnc-FAM230A-5	lnc-FAM230A-5:1	o	NONHSAG083566.1	NONHSAT191966.1	c	-	-	u
MN296928	LHRI_LNC1361.1	LHRI_LNC1361	1	214280373	214281069	-	1:214280373-214281069:-	NA	M0,M1,	M1,M0,M2,	NA	Promoter,	1	697	lnc-PTPN14-2	lnc-PTPN14-2:7	c	-	-	u	-	-	u
MN297547	LHRI_LNC307.1	LHRI_LNC307	19	1983945	1985565	+	19:1983945-1985565:+	BTBD2	NA	M2,M0,M1,	NA	NA	1	1621	lnc-MKNK2-3	lnc-MKNK2-3:2	x	NONHSAG024407.1	NONHSAT060386.1	x	-	-	u
MN298402	LHRI_LNC1286.11	LHRI_LNC1286	7	66553805	66592386	-	7:66553805-66592386:-	AC006001.3,AC006001.4	M1,M0,	M2,M1,M0,	M1,M0,	CTCF Binding Site,Promoter Flanking Region,	4	1503	lnc-SBDS-4	lnc-SBDS-4:5	j	NONHSAG047862.1	NONHSAT121261.1	k	-	-	u
MN296866	LHRI_LNC564.1	LHRI_LNC564	1	148116920	148117137	-	1:148116920-148117137:-	NBPF11	NA	M0,M1,M2,	NA	NA	1	218	lnc-GJA5-4	lnc-GJA5-4:8	i	NONHSAG002766.1	NONHSAT006118.1	i	-	-	u
MN297028	LHRI_LNC1805.1	LHRI_LNC1805	11	6534440	6534641	+	11:6534440-6534641:+	DNHD1	NA	M1,M0,M2,	NA	NA	1	202	-	-	u	-	-	u	-	-	u		Yes
MN298728	LHRI_LNC1688.4	LHRI_LNC1688	Y	3002998	3110940	+	Y:3002998-3110940:+	LINC00278	NA	NA	NA	NA	5	824	LINC00278	LINC00278:3	j	NONHSAG055665.2	NONHSAT139305.2	j	LINC00278	ENST00000425031.1	j	yes
MN298388	LHRI_LNC1271.4	LHRI_LNC1271	7	38341615	38373576	+	7:38341615-38373576:+	TRG-AS1	NA	M0,M1,	NA	Promoter Flanking Region,CTCF Binding Site,	4	502	TRG-AS1	TRG-AS1:7	j	NONHSAG047376.2	NONHSAT120179.2	j	TRG-AS1	ENST00000629357.1	j	yes
MN297583	LHRI_LNC357.2	LHRI_LNC357	19	33301407	33302145	+	19:33301407-33302145:+	AC008738.5	M1,M0,	M0,M1,M2,	M0,M1,	Promoter,	2	461	-	-	u	NONHSAG025483.2	NONHSAT179658.1	o	AC008738.5	ENST00000587312.1	o	yes
MN298233	LHRI_LNC1115.1	LHRI_LNC1115	5	163450120	163450523	+	5:163450120-163450523:+	NUDCD2	NA	M1,M0,M2,	NA	NA	1	404	lnc-GABRB2-7	lnc-GABRB2-7:1	x	NONHSAG042135.2	NONHSAT104904.2	x	-	-	u
MN298587	LHRI_LNC1508.12	LHRI_LNC1508	9	40992317	41014133	+	9:40992317-41014133:+	FRG1HP	M0,M1,	M2,M1,M0,	M0,M2,M1,	Promoter,	8	1600	lnc-ANKRD20A2-22	lnc-ANKRD20A2-22:2	j	NONHSAG052454.2	NONHSAT131633.2	j	AL353763.2	ENST00000623489.1	o	Yes?
MK279982	LHRI_LNC863.1	LHRI_LNC863	1	159790875	159826617	-	1:159790875-159826617:-	FCRL6,NA	M0,M1,	NA	M0,M1,	Promoter Flanking Region,	5	17766	lnc-VSIG8-2	lnc-VSIG8-2:4	j	NONHSAG003191.1	NONHSAT007020.1	o	-	-	u
MN298005	LHRI_LNC827.1	LHRI_LNC827	3	57555688	57556018	-	3:57555688-57556018:-	NA	M1,M0,	M2,M0,M1,	NA	Promoter,	1	331	lnc-DNAH12-1	lnc-DNAH12-1:2	c	NONHSAG035254.2	NONHSAT090085.2	c	-	-	u
MN297033	LHRI_LNC1810.1	LHRI_LNC1810	11	10858259	10909479	+	11:10858259-10909479:+	ZBED5-AS1	M1,M0,	M1,M0,M2,	M0,M1,	Promoter,	3	3200	ZBED5-AS1	ZBED5-AS1:29	j	NONHSAG007652.2	NONHSAT018001.2	j	ZBED5-AS1	ENST00000501079.5	j	Yes?
MN296902	LHRI_LNC1171.1	LHRI_LNC1171	1	198871578	198871954	-	1:198871578-198871954:-	MIR181A1HG	NA	M1,M0,	NA	CTCF Binding Site,	1	377	lnc-ATP6V1G3-4	lnc-ATP6V1G3-4:4	i	NONHSAG003884.1	NONHSAT008665.1	x	MIR181A1HG	ENST00000432296.1	i	yes
MN298655	LHRI_LNC1566.1	LHRI_LNC1566	9	128664206	128664621	-	9:128664206-128664621:-	NA	NA	M1,M0,M2,	NA	NA	1	416	-	-	u	NONHSAG053449.1	NONHSAT134757.1	i	-	-	u
MN298236	LHRI_LNC1119.1	LHRI_LNC1119	5	176546066	176546840	+	5:176546066-176546840:+	CDHR2	M0,M1,	NA	NA	Promoter,Enhancer,TF binding site,	1	775	-	-	u	-	-	u	-	-	u		Yes
MN298439	LHRI_LNC1331.1	LHRI_LNC1331	7	118196754	118197030	+	7:118196754-118197030:+	NA	NA	M2,M1,M0,	NA	Open chromatin,CTCF Binding Site,	1	277	-	-	u	-	-	u	-	-	u		Yes
MN297142	LHRI_LNC1932.2	LHRI_LNC1932	12	24955548	24964122	+	12:24955548-24964122:+	AC026310.2	NA	M1,	NA	NA	5	1291	lnc-LRMP-2	lnc-LRMP-2:1	j	NONHSAG010698.2	NONHSAT027335.2	j	AC026310.2	ENST00000546353.1	j	yes
MN297936	LHRI_LNC763.1	LHRI_LNC763	22	50539912	50540231	+	22:50539912-50540231:+	NA	NA	NA	M1,M0,	Promoter Flanking Region,	1	320	-	-	u	-	-	u	-	-	u		Yes
MN296776	LHRI_LNC124.1	LHRI_LNC124	1	2548939	2549553	+	1:2548939-2549553:+	AL139246.5	M1,M0,	M2,M1,M0,	M0,M1,	Promoter,	1	615	lnc-TNFRSF14-66	lnc-TNFRSF14-66:1	p	NONHSAG056060.1	NONHSAT148241.1	p	AL139246.5	ENST00000644246.1	p	yes
MN296812	LHRI_LNC89.1	LHRI_LNC89	1	54648613	54649240	+	1:54648613-54649240:+	MROH7-TTC4	NA	NA	NA	TF binding site,	1	628	-	-	u	-	-	u	-	-	u		Yes
MN297933	LHRI_LNC760.1	LHRI_LNC760	22	49848682	49849002	+	22:49848682-49849002:+	RF00017	M1,M0,	M2,M1,	NA	Promoter Flanking Region,	1	321	lnc-BRD1-5	lnc-BRD1-5:1	i	NONHSAG034210.1	NONHSAT087394.1	i	-	-	u
MN298100	LHRI_LNC945.1	LHRI_LNC945	4	16237288	16238501	+	4:16237288-16238501:+	TAPT1-AS1	NA	NA	NA	Open chromatin,	1	1214	TAPT1-AS1	TAPT1-AS1:13	c	NONHSAG037561.2	NONHSAT095675.2	i	TAPT1-AS1	ENST00000573950.5	i	yes
MN297973	LHRI_LNC796.1	LHRI_LNC796	3	42582868	42583085	+	3:42582868-42583085:+	SEC22C	M1,M0,	M0,	NA	Promoter,	1	218	-	-	u	-	-	u	-	-	u		Yes
MN298048	LHRI_LNC878.1	LHRI_LNC878	3	152935666	152935970	+	3:152935666-152935970:+	NA	NA	M2,M1,M0,	NA	CTCF Binding Site,	1	305	-	-	u	NONHSAG085062.1	NONHSAT194681.1	c	-	-	u
MN298486	LHRI_LNC1381.2	LHRI_LNC1381	8	22953632	22983001	-	8:22953632-22983001:-	PEBP4,RN7SL303P	NA	NA	NA	Enhancer,Promoter Flanking Region,	2	390	lnc-RHOBTB2-1	lnc-RHOBTB2-1:1	x	NONHSAG049751.1	NONHSAT125539.1	x	-	-	u
MK280645	LHRI_LNC1614.1	LHRI_LNC1614	X	1396427	1399402	+	X:1396427-1399402:+	LINC00106	NA	M0,M1,M2,	NA	NA	4	758	LINC00106	LINC00106:12	j	NONHSAG053919.2	NONHSAT136054.2	k	LINC00106	ENST00000430235.7	k	yes
MN298404	LHRI_LNC1287.1	LHRI_LNC1287	7	66627984	66628662	-	7:66627984-66628662:-	NA	M1,M0,	NA	M0,	Promoter,	1	679	-	-	u	-	-	u	-	-	u		Yes
MN296873	LHRI_LNC620.1	LHRI_LNC620	1	150364381	150364594	+	1:150364381-150364594:+	RPRD2	M0,M1,	NA	M0,M1,	Promoter,	1	214	-	-	u	-	-	u	-	-	u		Yes
MN298156	LHRI_LNC1015.1	LHRI_LNC1015	4	184691129	184691346	+	4:184691129-184691346:+	PRIMPOL	NA	M1,M0,M2,	NA	Enhancer,	1	218	-	-	u	-	-	u	-	-	u		Yes
MN297533	LHRI_LNC288.1	LHRI_LNC288	18	21112037	21112468	+	18:21112037-21112468:+	NA	M0,M1,	NA	M1,M0,	Promoter,	1	432	lnc-GREB1L-2	lnc-GREB1L-2:1	c	NONHSAG023489.2	NONHSAT178254.1	i	-	-	u
MN297313	LHRI_LNC48.3	LHRI_LNC48	15	74461296	74481266	+	15:74461296-74481266:+	UBL7-AS1	M1,M0,	M0,M2,	NA	Promoter Flanking Region,Promoter,	4	1333	UBL7-AS1	UBL7-AS1:4	j	NONHSAG017417.2	NONHSAT047234.2	j	UBL7-AS1	ENST00000564621.1	j	Yes?
MN297953	LHRI_LNC772.14	LHRI_LNC772	3	11202616	11225927	-	3:11202616-11225927:-	HRH1	M1,M0,	M1,M0,M2,	M1,M0,	Open chromatin,Promoter,Enhancer,	4	4749	lnc-VGLL4-9	lnc-VGLL4-9:3	j	NONHSAG085341.1	NONHSAT195411.1	o	AC083855.2	ENST00000648436.1	o	yes
MN297010	LHRI_LNC1781.1	LHRI_LNC1781	10	110004388	110004599	-	10:110004388-110004599:-	ADD3	NA	M2,M1,	NA	Enhancer,Promoter,	1	212	lnc-MXI1-4	lnc-MXI1-4:1	x	NONHSAG006845.2	NONHSAT016328.2	x	ADD3-AS1	ENST00000369655.3	i	yes
MN297918	LHRI_LNC736.1	LHRI_LNC736	22	31944566	31944785	-	22:31944566-31944785:-	YWHAH	M0,M1,	NA	M0,	Promoter,	1	220	lnc-PRR14L-5	lnc-PRR14L-5:2	i	NONHSAG033733.2	NONHSAT084920.2	i	C22orf24	ENST00000623735.1	i	yes
MN297682	LHRI_LNC491.1	LHRI_LNC491	2	91784086	91784336	+	2:91784086-91784336:+	NA	NA	M1,M2,	NA	CTCF Binding Site,	1	251	lnc-RPIA-30	lnc-RPIA-30:1	p	NONHSAG028530.2	NONHSAT072378.2	p	-	-	u
MN297171	LHRI_LNC1974.1	LHRI_LNC1974	12	68973786	68975322	+	12:68973786-68975322:+	NA	NA	M2,M0,M1,	NA	Promoter Flanking Region,	1	1537	-	-	u	-	-	u	-	-	u		Yes
MN297552	LHRI_LNC313.1	LHRI_LNC313	19	3440011	3440425	+	19:3440011-3440425:+	NFIC	NA	M2,M1,M0,	NA	TF binding site,	1	415	-	-	u	NONHSAG024474.2	NONHSAT179359.1	i	-	-	u
MN298662	LHRI_LNC1571.1	LHRI_LNC1571	9	130051945	130053859	-	9:130051945-130053859:-	GPR107	M1,M0,	M2,	M1,M2,M0,	Promoter,	1	1915	lnc-FNBP1-3	lnc-FNBP1-3:1	e	NONHSAG053605.2	NONHSAT135131.2	e	-	-	u
MN296946	LHRI_LNC1644.1	LHRI_LNC1644	1	247126435	247126665	+	1:247126435-247126665:+	ZNF124	M0,M1,	M1,M0,M2,	M0,	Promoter Flanking Region,CTCF Binding Site,	1	231	lnc-NLRP3-11	lnc-NLRP3-11:1	e	NONHSAG004906.1	NONHSAT010746.1	i	-	-	u
MK280637	LHRI_LNC1568.2	LHRI_LNC1568	9	129282458	129289933	+	9:129282458-129289933:+	AL161785.2,AL161785.1	M1,M0,	M2,M1,M0,	NA	Promoter Flanking Region,	4	4768	lnc-PTPA-3	lnc-PTPA-3:6	j	NONHSAG053576.2	NONHSAT135036.2	k	AL161785.1	ENST00000455981.1	k	yes
MN298202	LHRI_LNC1069.3	LHRI_LNC1069	5	91380652	91471033	+	5:91380652-91471033:+	ARRDC3-AS1	M0,M1,	M0,M1,M2,	M0,M1,	Promoter,	3	532	ARRDC3-AS1	ARRDC3-AS1:1	j	NONHSAG041008.2	NONHSAT102762.2	j	ARRDC3-AS1	ENST00000625713.2	j	yes
MN297048	LHRI_LNC1828.1	LHRI_LNC1828	11	61815554	61815922	+	11:61815554-61815922:+	FADS1	M1,M0,	M2,M0,M1,	M1,M0,	Promoter,	1	369	lnc-TMEM258-2	lnc-TMEM258-2:1	x	NONHSAG063458.1	NONHSAT160374.1	i	-	-	u
MK280440	LHRI_LNC950.1	LHRI_LNC950	4	38744100	38753888	+	4:38744100-38753888:+	NA	NA	NA	M0,	Promoter Flanking Region,	5	3383	lnc-KLF3-2	lnc-KLF3-2:1	k	NONHSAG037769.2	NONHSAT096054.2	k	-	-	u
MN296987	LHRI_LNC1746.1	LHRI_LNC1746	10	75589091	75589291	+	10:75589091-75589291:+	LRMDA	NA	M2,	NA	NA	1	201	-	-	u	NONHSAG006233.1	NONHSAT014038.1	i	-	-	u
MN297759	LHRI_LNC585.3	LHRI_LNC585	2	207662375	207679117	+	2:207662375-207679117:+	LINC01857	NA	M2,	NA	Promoter Flanking Region,	5	1387	LINC01857	LINC01857:11	j	NONHSAG030374.2	NONHSAT076616.2	j	LINC01857	ENST00000429730.1	j	yes
MN297934	LHRI_LNC761.1	LHRI_LNC761	22	50305025	50305277	+	22:50305025-50305277:+	PLXNB2	M1,M0,	M2,M0,M1,	M1,M0,	Promoter,	1	253	-	-	u	-	-	u	-	-	u		Yes
MN297239	LHRI_LNC2062.1	LHRI_LNC2062	14	49634059	49634420	+	14:49634059-49634420:+	DNAAF2	M0,M1,	M1,	M0,	Promoter,	1	362	-	-	u	NONHSAG068763.1	NONHSAT168412.1	e	-	-	u
MN297018	LHRI_LNC1791.1	LHRI_LNC1791	10	133235476	133235717	+	10:133235476-133235717:+	NA	NA	NA	NA	Promoter Flanking Region,	1	242	-	-	u	-	-	u	-	-	u		Yes
MN298071	LHRI_LNC912.9	LHRI_LNC912	3	197614027	197627846	-	3:197614027-197627846:-	AC132008.2	M0,M1,	M0,M2,	M2,M1,M0,	Promoter,	7	1348	lnc-BDH1-5	lnc-BDH1-5:3	j	NONHSAG037155.2	NONHSAT094415.2	j	-	-	u
MK280195	LHRI_LNC104.1	LHRI_LNC104	16	29424617	29425511	-	16:29424617-29425511:-	BOLA2-SMG1P6	NA	M0,M1,M2,	NA	NA	1	895	-	-	u	-	-	u	-	-	u		Yes
MN298670	LHRI_LNC1580.1	LHRI_LNC1580	9	136834234	136837503	-	9:136834234-136837503:-	RABL6	NA	M0,M1,M2,	NA	NA	1	3270	CCDC183-AS1	CCDC183-AS1:4	e	NONHSAG053814.2	NONHSAT135605.2	e	-	-	u
MK280430	LHRI_LNC898.2	LHRI_LNC898	3	183447651	183455993	+	3:183447651-183455993:+	LINC00888	M1,	NA	NA	Promoter Flanking Region,Promoter,	4	1266	lnc-B3GNT5-11	lnc-B3GNT5-11:10	j	NONHSAG036820.2	NONHSAT093646.2	j	-	-	u
MN298440	LHRI_LNC1332.3	LHRI_LNC1332	7	128533652	128562461	+	7:128533652-128562461:+	AC090114.3	M1,M0,	M2,M0,M1,	M2,M1,M0,	Promoter,	2	226	lnc-METTL2B-3	lnc-METTL2B-3:6	j	NONHSAG048748.2	NONHSAT123205.2	j	-	-	u
MN298074	LHRI_LNC915.1	LHRI_LNC915	3	198154945	198155365	+	3:198154945-198155365:+	FAM157A	NA	M1,	NA	Promoter Flanking Region,CTCF Binding Site,	1	421	lnc-LMLN-1	lnc-LMLN-1:5	i	NONHSAG037187.2	NONHSAT094493.2	i	-	-	u
MN298585	LHRI_LNC1496.1	LHRI_LNC1496	9	40355365	40358682	+	9:40355365-40358682:+	AL591471.1	NA	M2,	NA	NA	2	1978	lnc-ANKRD20A2-8	lnc-ANKRD20A2-8:1	j	NONHSAG052282.2	NONHSAT131317.2	j	-	-	u
MK280581	LHRI_LNC1392.1	LHRI_LNC1392	8	41828277	41832742	+	8:41828277-41832742:+	ANK1	M0,	M2,	M0,	CTCF Binding Site,Promoter Flanking Region,	1	4466	lnc-KAT6A-1	lnc-KAT6A-1:1	x	NONHSAG050083.2	NONHSAT126253.2	x	AC027702.1	ENST00000563810.1	x	yes
MN297585	LHRI_LNC359.1	LHRI_LNC359	19	34964053	34964271	-	19:34964053-34964271:-	NA	M1,M0,	NA	NA	Promoter,CTCF Binding Site,	1	219	-	-	u	-	-	u	-	-	u		Yes
MN297700	LHRI_LNC517.17	LHRI_LNC517	2	111429309	111495859	-	2:111429309-111495859:-	MIR4435-2HG,AC017002.6	NA	NA	M0,M1,M2,	Promoter,	3	706	MIR4435-2HG	MIR4435-2HG:38	j	NONHSAG056025.2	NONHSAT073622.2	j	AC017002.6	ENST00000644013.1	j	yes
MN298320	LHRI_LNC1204.1	LHRI_LNC1204	6	111306400	111306731	+	6:111306400-111306731:+	REV3L	NA	M2,M1,M0,	NA	NA	1	332	-	-	u	NONHSAG044598.1	NONHSAT114442.1	i	-	-	u
MN298314	LHRI_LNC1195.1	LHRI_LNC1195	6	77368906	77369148	-	6:77368906-77369148:-	NA	NA	NA	NA	Promoter Flanking Region,	1	243	lnc-HTR1B-1	lnc-HTR1B-1:3	c	NONHSAG044180.2	NONHSAT113659.2	o	-	-	u
MN297317	LHRI_LNC54.1	LHRI_LNC54	15	83090415	83092899	-	15:83090415-83092899:-	AC022558.2	NA	M2,	NA	Promoter Flanking Region,	1	2485	lnc-FAM103A1-1	lnc-FAM103A1-1:1	i	NONHSAG070896.1	NONHSAT171850.1	e	AC022558.2	ENST00000566841.1	i	yes
MN297935	LHRI_LNC762.1	LHRI_LNC762	22	50539242	50539688	-	22:50539242-50539688:-	NA	NA	NA	M0,M1,	Promoter Flanking Region,	1	447	-	-	u	-	-	u	-	-	u		Yes
MN298087	LHRI_LNC931.1	LHRI_LNC931	4	2964775	2965039	+	4:2964775-2965039:+	GRK4	M0,M1,	M2,M1,	NA	Promoter,	1	265	-	-	u	NONHSAG037321.2	NONHSAT094838.2	i	-	-	u
MK280212	LHRI_LNC169.6	LHRI_LNC169	17	6994576	7012349	-	17:6994576-7012349:-	ALOX12-AS1	M1,M0,	M2,M0,M1,	M0,M1,	Promoter,	3	2797	lnc-SLC16A11-7	lnc-SLC16A11-7:5	j	NONHSAG020671.2	NONHSAT175889.1	j	ALOX12-AS1	ENST00000574377.5	j	yes
MN298277	LHRI_LNC1153.1	LHRI_LNC1153	6	26474314	26474702	+	6:26474314-26474702:+	BTN2A1	NA	M0,	M0,	Promoter Flanking Region,	1	389	lnc-BTN2A1-1	lnc-BTN2A1-1:2	e	NONHSAG043249.1	NONHSAT108285.1	e	-	-	u
MN297479	LHRI_LNC222.1	LHRI_LNC222	17	44325349	44325767	+	17:44325349-44325767:+	NA	M1,M0,	M2,M1,M0,	NA	Promoter,	1	419	lnc-RUNDC3A-2	lnc-RUNDC3A-2:1	e	NONHSAG021926.2	NONHSAT053939.2	e	-	-	u
MN297738	LHRI_LNC563.4	LHRI_LNC563	2	178523167	178543473	+	2:178523167-178543473:+	TTN-AS1	M0,M1,	M2,M1,	NA	Promoter,CTCF Binding Site,	7	3397	-	-	u	NONHSAG029956.2	NONHSAT075758.2	j	TTN-AS1	ENST00000419746.5	j	yes
MN297030	LHRI_LNC1804.1	LHRI_LNC1804	11	7512837	7513626	-	11:7512837-7513626:-	PPFIBP2	M0,M1,	NA	M0,M1,	Promoter Flanking Region,Promoter,	1	790	lnc-CYB5R2-3	lnc-CYB5R2-3:16	c	NONHSAG007561.2	NONHSAT017787.2	c	-	-	u
MN298144	LHRI_LNC998.1	LHRI_LNC998	4	158279055	158280177	+	4:158279055-158280177:+	AC098679.2	NA	M0,M1,M2,	NA	Open chromatin,	1	1123	lnc-TMEM144-3	lnc-TMEM144-3:1	p	-	-	u	-	-	u
MN298153	LHRI_LNC1013.1	LHRI_LNC1013	4	184334330	184343932	-	4:184334330-184343932:-	LINC02363	NA	NA	M0,M1,	Promoter Flanking Region,	4	656	LINC02363	LINC02363:11	j	NONHSAG039486.2	NONHSAT099520.2	j	LINC02363	ENST00000317596.3	j	yes
MN298561	LHRI_LNC1476.1	LHRI_LNC1476	9	5874830	5875064	-	9:5874830-5875064:-	NA	NA	M2,M1,M0,	NA	NA	1	235	-	-	u	NONHSAG101852.1	NONHSAT220473.1	c	-	-	u
MN297514	LHRI_LNC273.1	LHRI_LNC273	17	80416308	80416595	+	17:80416308-80416595:+	ENDOV	M1,M0,	M0,M1,M2,	NA	Promoter Flanking Region,Promoter,	1	288	lnc-TMEM105-1	lnc-TMEM105-1:1	i	NONHSAG023100.1	NONHSAT056712.1	e	-	-	u
MN298146	LHRI_LNC1002.1	LHRI_LNC1002	4	163523838	163524129	+	4:163523838-163524129:+	NA	NA	M2,M1,M0,	NA	Open chromatin,	1	292	-	-	u	-	-	u	-	-	u		Yes
MN297502	LHRI_LNC258.1	LHRI_LNC258	17	67879750	67879977	+	17:67879750-67879977:+	BPTF	NA	M2,M1,M0,	NA	NA	1	228	lnc-C17orf58-4	lnc-C17orf58-4:1	i	NONHSAG022574.2	NONHSAT055443.2	x	-	-	u
MN297721	LHRI_LNC536.4	LHRI_LNC536	2	142862923	142866061	-	2:142862923-142866061:-	AC013444.1,NA	NA	NA	M0,M1,	Promoter Flanking Region,	2	804	lnc-LRP1B-4	lnc-LRP1B-4:8	j	-	-	u	-	-	u
MN298282	LHRI_LNC1151.1	LHRI_LNC1151	6	27866816	27867200	+	6:27866816-27867200:+	HIST1H1B	M1,	NA	NA	Promoter,	1	385	-	-	u	-	-	u	-	-	u		Yes
MN298687	LHRI_LNC1627.2	LHRI_LNC1627	X	38870501	39019553	+	X:38870501-39019553:+	NA	NA	NA	NA	Promoter Flanking Region,	2	669	lnc-MID1IP1-2	lnc-MID1IP1-2:1	j	NONHSAG103355.1	NONHSAT222623.1	j	-	-	u
MN298009	LHRI_LNC832.1	LHRI_LNC832	3	71575341	71575558	-	3:71575341-71575558:-	FOXP1	NA	M2,	NA	NA	1	218	lnc-EIF4E3-3	lnc-EIF4E3-3:2	i	NONHSAG035399.1	NONHSAT090403.1	i	-	-	u
MK280128	LHRI_LNC2017.1	LHRI_LNC2017	13	42810366	42819842	-	13:42810366-42819842:-	LINC01050	NA	NA	NA	CTCF Binding Site,Open chromatin,	3	3672	LINC01050	LINC01050:2	j	NONHSAG013349.2	NONHSAT033439.2	j	LINC01050	ENST00000604485.1	j	Yes?
MN297367	LHRI_LNC110.1	LHRI_LNC110	16	30379207	30379621	+	16:30379207-30379621:+	2019-09-01	M1,	NA	M0,	Promoter,Promoter Flanking Region,	1	415	-	-	u	-	-	u	-	-	u		Yes
MN296874	LHRI_LNC644.1	LHRI_LNC644	1	150618977	150620409	-	1:150618977-150620409:-	ENSA	NA	M2,M0,M1,	NA	Promoter Flanking Region,Open chromatin,	1	1433	-	-	u	-	-	u	-	-	u		Yes
MN297796	LHRI_LNC631.1	LHRI_LNC631	20	18301913	18302123	+	20:18301913-18302123:+	ZNF133	NA	M2,	NA	Open chromatin,	1	211	lnc-DZANK1-3	lnc-DZANK1-3:3	i	NONHSAG031361.2	NONHSAT189399.1	i	-	-	u
MN297701	LHRI_LNC517.26	LHRI_LNC517	2	111429323	111480261	-	2:111429323-111480261:-	MIR4435-2HG,AC017002.6	NA	M0,M1,M2,	NA	Promoter Flanking Region,	2	442	MIR4435-2HG	MIR4435-2HG:38	j	NONHSAG056025.2	NONHSAT073639.2	j	AC017002.6	ENST00000644013.1	j	yes
MN298612	LHRI_LNC1523.9	LHRI_LNC1523	9	72226592	72291846	-	9:72226592-72291846:-	GDA,AL135924.1,NA	NA	M0,M2,	M0,	CTCF Binding Site,Promoter Flanking Region,	5	2411	lnc-GDA-3	lnc-GDA-3:1	x	NONHSAG052553.2	NONHSAT131854.2	x	AL135924.2	ENST00000427901.1	x	yes
MN298438	LHRI_LNC1330.1	LHRI_LNC1330	7	115926314	115926581	-	7:115926314-115926581:-	NA	NA	M1,M2,	NA	NA	1	268	-	-	u	NONHSAG048603.1	NONHSAT122863.1	i	-	-	u
MN296901	LHRI_LNC1160.1	LHRI_LNC1160	1	193257846	193259703	+	1:193257846-193259703:+	NA	NA	M2,M0,M1,	NA	Open chromatin,	1	1858	lnc-CDC73-5	lnc-CDC73-5:1	e	NONHSAG003821.2	NONHSAT008565.2	e	-	-	u
MN298517	LHRI_LNC1423.1	LHRI_LNC1423	8	86342995	86343449	+	8:86342995-86343449:+	AC103760.1	M1,M0,	M2,	M0,	Promoter,	1	455	lnc-SLC7A13-1	lnc-SLC7A13-1:1	x	NONHSAG050673.2	NONHSAT127550.2	x	AC103760.1	ENST00000521326.1	x	Yes?
MN297263	LHRI_LNC2077.1	LHRI_LNC2077	14	73565958	73566461	-	14:73565958-73566461:-	NA	NA	M1,M0,M2,	NA	Promoter Flanking Region,Promoter,	1	504	lnc-HEATR4-5	lnc-HEATR4-5:1	c	NONHSAG015420.2	NONHSAT037718.2	c	-	-	u
MN297197	LHRI_LNC2002.1	LHRI_LNC2002	12	121426955	121427615	-	12:121426955-121427615:-	RNF34	NA	M0,M1,M2,	NA	Promoter Flanking Region,	1	661	lnc-CAMKK2-1	lnc-CAMKK2-1:1	i	NONHSAG012540.2	NONHSAT031417.2	i	-	-	u
MK280303	LHRI_LNC520.3	LHRI_LNC520	2	113230614	113263409	+	2:113230614-113263409:+	PAX8-AS1	NA	NA	NA	Open chromatin,	5	739	PAX8-AS1	PAX8-AS1:29	j	NONHSAG029003.2	NONHSAT073769.2	j	PAX8-AS1	ENST00000436293.6	j	yes
MN298648	LHRI_LNC1556.1	LHRI_LNC1556	9	114654961	114655365	+	9:114654961-114655365:+	NA	NA	M0,	NA	CTCF Binding Site,Open chromatin,Enhancer,	1	405	-	-	u	-	-	u	-	-	u		Yes
MK280201	LHRI_LNC121.3	LHRI_LNC121	16	55426797	55444759	-	16:55426797-55444759:-	MMP2-AS1	NA	NA	NA	Promoter Flanking Region,	6	816	MMP2-AS1	MMP2-AS1:7	j	NONHSAG019510.2	NONHSAT142632.2	j	MMP2-AS1	ENST00000569037.5	j	yes
MK280684	LHRI_LNC1694.3	LHRI_LNC1694	Y	19567382	19590418	+	Y:19567382-19590418:+	TXLNGY	NA	NA	NA	NA	4	1978	lnc-HSFY1-2	lnc-HSFY1-2:4	j	NONHSAG055861.2	NONHSAT139620.2	j	-	-	u
MN298441	LHRI_LNC1334.1	LHRI_LNC1334	7	129620140	129620377	+	7:129620140-129620377:+	NRF1	NA	M0,M2,	NA	Promoter Flanking Region,	1	238	lnc-SMKR1-3	lnc-SMKR1-3:2	i	NONHSAG048791.1	NONHSAT123320.1	i	-	-	u
MN297826	LHRI_LNC656.20	LHRI_LNC656	20	40875493	40889436	-	20:40875493-40889436:-	AL035665.1,RNA5SP484,NA	NA	NA	NA	Promoter Flanking Region,	3	1177	lnc-MAFB-3	lnc-MAFB-3:1	y	NONHSAG081962.1	NONHSAT189677.1	j	-	-	u
MK280273	LHRI_LNC412.1	LHRI_LNC412	19	58564991	58565269	-	19:58564991-58565269:-	MZF1-AS1	NA	M2,M1,M0,	NA	Promoter Flanking Region,	1	279	lnc-TRIM28-14	lnc-TRIM28-14:2	i	NONHSAG026743.2	NONHSAT068460.2	i	MZF1-AS1	ENST00000593642.5	i	yes
MN297447	LHRI_LNC210.1	LHRI_LNC210	17	38799616	38801920	+	17:38799616-38801920:+	PIP4K2B	M1,M0,	M2,M0,M1,	M0,	Promoter,	3	902	-	-	u	-	-	u	-	-	u		Yes
MN297002	LHRI_LNC1771.1	LHRI_LNC1771	10	95892357	95892658	+	10:95892357-95892658:+	ENTPD1-AS1	NA	M0,M1,M2,	NA	NA	1	302	ENTPD1-AS1	ENTPD1-AS1:34	x	NONHSAG006588.2	NONHSAT015766.2	x	ENTPD1-AS1	ENST00000416301.5	i	yes
MN297963	LHRI_LNC780.1	LHRI_LNC780	3	22442001	22461343	+	3:22442001-22461343:+	NA	NA	NA	NA	NA	2	255	lnc-ZNF385D-2	lnc-ZNF385D-2:1	x	NONHSAG085390.1	NONHSAT195486.1	x	-	-	u
MN297942	LHRI_LNC769.1	LHRI_LNC769	3	9402559	9402790	+	3:9402559-9402790:+	SETD5	NA	M0,M2,	NA	Promoter Flanking Region,Promoter,	1	232	-	-	u	NONHSAG034363.1	NONHSAT087761.1	i	-	-	u
MN297340	LHRI_LNC70.1	LHRI_LNC70	16	1618840	1619051	+	16:1618840-1619051:+	CRAMP1	NA	M2,M0,M1,	NA	NA	1	212	-	-	u	-	-	u	-	-	u		Yes
MN297022	LHRI_LNC1795.1	LHRI_LNC1795	11	587559	588170	+	11:587559-588170:+	PHRF1	NA	M1,M0,M2,	NA	Promoter Flanking Region,TF binding site,	1	612	-	-	u	-	-	u	-	-	u		Yes
MN298640	LHRI_LNC1546.1	LHRI_LNC1546	9	100304139	100304508	+	9:100304139-100304508:+	TEX10	NA	M1,M0,M2,	NA	NA	1	370	lnc-ERP44-6	lnc-ERP44-6:1	x	-	-	u	-	-	u
MN297735	LHRI_LNC555.2	LHRI_LNC555	2	176200967	176201247	-	2:176200967-176201247:-	AC016739.1	NA	M2,	NA	NA	2	227	lnc-EVX2-8	lnc-EVX2-8:1	o	NONHSAG029908.2	NONHSAT075650.2	o	-	-	u
MN297977	LHRI_LNC800.1	LHRI_LNC800	3	44739313	44739584	+	3:44739313-44739584:+	KIAA1143	NA	M2,	NA	NA	1	272	-	-	u	-	-	u	-	-	u		Yes
MN297211	LHRI_LNC2024.1	LHRI_LNC2024	13	51351471	51351716	-	13:51351471-51351716:-	SERPINE3	NA	M2,	NA	NA	1	246	-	-	u	-	-	u	-	-	u		Yes
MN297609	LHRI_LNC395.1	LHRI_LNC395	19	52578253	52653284	-	19:52578253-52653284:-	AC022150.4	NA	M1,M0,M2,	NA	NA	2	4849	lnc-ZNF611-1	lnc-ZNF611-1:1	k	NONHSAG026419.2	NONHSAT067569.2	x	AC022150.4	ENST00000598322.1	k	yes
MK280550	LHRI_LNC1299.1	LHRI_LNC1299	7	77064913	77065114	+	7:77064913-77065114:+	AC007000.3	NA	M1,M0,M2,	NA	NA	1	202	lnc-CCDC146-4	lnc-CCDC146-4:6	p	NONHSAG097169.1	NONHSAT213635.1	x	AC007000.3	ENST00000459742.1	i	yes
MN297060	LHRI_LNC1841.1	LHRI_LNC1841	11	65420793	65421364	-	11:65420793-65421364:-	NA	M0,M1,	M1,M0,	M1,M2,M0,	Promoter,	1	572	lnc-LTBP3-2	lnc-LTBP3-2:10	c	NONHSAG008671.2	NONHSAT160426.1	o	-	-	u
MN297794	LHRI_LNC628.1	LHRI_LNC628	20	17885478	17885797	-	20:17885478-17885797:-	AL035045.1	NA	M1,M0,M2,	NA	CTCF Binding Site,TF binding site,Promoter Flanking Region,	1	320	lnc-SNX5-1	lnc-SNX5-1:2	p	NONHSAG081389.1	NONHSAT188499.1	i	AL035045.1	ENST00000425405.1	p	yes
MN298131	LHRI_LNC986.1	LHRI_LNC986	4	128868570	128868810	+	4:128868570-128868810:+	SCLT1	NA	M2,M0,M1,	NA	NA	1	241	lnc-SCLT1-4	lnc-SCLT1-4:1	i	NONHSAG038849.1	NONHSAT098251.1	i	-	-	u
MN297605	LHRI_LNC388.1	LHRI_LNC388	19	51127052	51127815	-	19:51127052-51127815:-	SIGLEC9	M1,M0,	M2,M1,M0,	M1,M0,	Promoter Flanking Region,	1	764	-	-	u	-	-	u	-	-	u		Yes
MN297519	LHRI_LNC279.1	LHRI_LNC279	18	2566217	2566457	-	18:2566217-2566457:-	METTL4	NA	M0,M1,M2,	NA	NA	1	241	-	-	u	-	-	u	-	-	u		Yes
MN297041	LHRI_LNC1818.1	LHRI_LNC1818	11	43866469	43867118	+	11:43866469-43867118:+	AC087521.2	NA	NA	NA	Promoter Flanking Region,Open chromatin,	1	650	lnc-ALX4-5	lnc-ALX4-5:1	i	NONHSAG008130.2	NONHSAT160278.1	x	AC087521.2	ENST00000530450.1	i	yes
MN298636	LHRI_LNC1541.1	LHRI_LNC1541	9	97199824	97200044	-	9:97199824-97200044:-	ANKRD18CP	NA	M2,M0,M1,	NA	TF binding site,Promoter Flanking Region,CTCF Binding Site,	1	221	lnc-CTSV-3	lnc-CTSV-3:1	c	NONHSAG052985.2	NONHSAT133493.2	p	AL590705.1	ENST00000366109.2	p	yes
MN297500	LHRI_LNC257.1	LHRI_LNC257	17	66451211	66463212	-	17:66451211-66463212:-	PRKCA	NA	M2,	NA	Promoter Flanking Region,	2	1568	lnc-APOH-3	lnc-APOH-3:1	j	NONHSAG022544.2	NONHSAT175498.1	i	-	-	u
MN297003	LHRI_LNC1770.1	LHRI_LNC1770	10	96132040	96132316	+	10:96132040-96132316:+	ZNF518A	M1,M0,	M0,M1,M2,	M0,M1,	Promoter,	1	277	lnc-CCNJ-1	lnc-CCNJ-1:25	c	NONHSAG006598.2	NONHSAT155905.1	i	-	-	u
MN297894	LHRI_LNC702.1	LHRI_LNC702	21	42521735	42523597	-	21:42521735-42523597:-	SLC37A1	NA	M2,M1,M0,	NA	Promoter Flanking Region,Enhancer,CTCF Binding Site,	1	1863	lnc-RSPH1-7	lnc-RSPH1-7:3	c	-	-	u	-	-	u
MN298112	LHRI_LNC956.1	LHRI_LNC956	4	55273835	55311978	-	4:55273835-55311978:-	RNU6-746P	NA	NA	NA	Open chromatin,CTCF Binding Site,	4	482	-	-	u	NONHSAG037961.1	NONHSAT096421.1	y	-	-	u
MN297991	LHRI_LNC814.1	LHRI_LNC814	3	49181802	49182199	-	3:49181802-49182199:-	C3orf84	NA	M1,	NA	CTCF Binding Site,	1	398	lnc-CCDC71-2	lnc-CCDC71-2:1	i	-	-	u	-	-	u
MN298309	LHRI_LNC1188.1	LHRI_LNC1188	6	54209924	54210731	+	6:54209924-54210731:+	MLIP	NA	M2,	NA	NA	1	808	-	-	u	-	-	u	-	-	u		Yes
MN298078	LHRI_LNC920.1	LHRI_LNC920	4	485611	485970	-	4:485611-485970:-	ZNF721	NA	M1,M0,M2,	NA	NA	1	360	-	-	u	-	-	u	-	-	u		Yes
MN297568	LHRI_LNC332.1	LHRI_LNC332	19	15345868	15346559	+	19:15345868-15346559:+	AC005776.2	NA	M1,M0,M2,	NA	NA	1	692	lnc-AKAP8-2	lnc-AKAP8-2:1	x	NONHSAG076399.1	NONHSAT180195.1	x	AC005776.2	ENST00000609708.1	x	yes
MN298079	LHRI_LNC921.1	LHRI_LNC921	4	487207	487739	-	4:487207-487739:-	ZNF721	NA	M2,M0,M1,	NA	NA	1	533	-	-	u	-	-	u	-	-	u		Yes
MN298143	LHRI_LNC1000.1	LHRI_LNC1000	4	158205380	158205858	+	4:158205380-158205858:+	TMEM144	NA	M1,M0,	NA	NA	1	479	-	-	u	NONHSAG039201.1	NONHSAT098966.1	i	-	-	u
MN297580	LHRI_LNC354.1	LHRI_LNC354	19	24057812	24058386	+	19:24057812-24058386:+	AC092279.1	NA	M2,M1,M0,	NA	NA	1	575	lnc-ZNF726-1	lnc-ZNF726-1:5	e	NONHSAG025369.2	NONHSAT063955.2	e	AC092279.1	ENST00000597683.1	i	yes
MN298195	LHRI_LNC1057.1	LHRI_LNC1057	5	78355445	78356918	-	5:78355445-78356918:-	SCAMP1-AS1	NA	M0,M1,M2,	NA	NA	1	1474	SCAMP1-AS1	SCAMP1-AS1:11	c	NONHSAG040804.2	NONHSAT102316.2	o	SCAMP1-AS1	ENST00000513755.1	i	yes
MN297945	LHRI_LNC772.4	LHRI_LNC772	3	11192166	11225942	-	3:11192166-11225942:-	HRH1	M0,M1,	M2,M1,M0,	M0,M1,	Open chromatin,Promoter,Enhancer,	5	5996	lnc-VGLL4-9	lnc-VGLL4-9:3	j	NONHSAG085340.1	NONHSAT195410.1	j	AC083855.2	ENST00000648436.1	j	yes
MK280503	LHRI_LNC2055.2	LHRI_LNC2055	14	24442982	24445097	+	14:24442982-24445097:+	NA	M1,	M1,M0,M2,	M1,M0,	Promoter,	2	945	lnc-KHNYN-1	lnc-KHNYN-1:1	j	NONHSAG014560.2	NONHSAT036062.2	j	-	-	u
MN298142	LHRI_LNC999.1	LHRI_LNC999	4	158203108	158203412	+	4:158203108-158203412:+	TMEM144	NA	M0,M1,	NA	Enhancer,	1	305	FAM198B-AS1	FAM198B-AS1:30	p	NONHSAG039201.1	NONHSAT098966.1	i	FAM198B-AS1	ENST00000503611.5	p	yes
MN297883	LHRI_LNC689.1	LHRI_LNC689	21	29366568	29366889	+	21:29366568-29366889:+	BACH1	NA	M1,M0,M2,	NA	NA	1	322	-	-	u	-	-	u	-	-	u		Yes
MN298634	LHRI_LNC1540.1	LHRI_LNC1540	9	96845370	96845598	-	9:96845370-96845598:-	ZNF782	NA	M2,M0,M1,	NA	NA	1	229	lnc-MFSD14C-4	lnc-MFSD14C-4:3	i	NONHSAG052970.2	NONHSAT221056.1	i	-	-	u
MN296877	LHRI_LNC701.1	LHRI_LNC701	1	151458291	151458622	-	1:151458291-151458622:-	POGZ	M0,M1,	NA	M0,M1,	Promoter,Open chromatin,	1	332	lnc-PSMB4-2	lnc-PSMB4-2:1	x	NONHSAG056839.1	NONHSAT149805.1	x	-	-	u
MN297784	LHRI_LNC619.1	LHRI_LNC619	20	2584164	2584422	+	20:2584164-2584422:+	TMC2	NA	M2,	NA	Open chromatin,	1	259	-	-	u	-	-	u	-	-	u		Yes
MN296966	LHRI_LNC1715.1	LHRI_LNC1715	10	31703911	31704159	-	10:31703911-31704159:-	AL161935.3	NA	M2,	M1,M0,	CTCF Binding Site,Promoter Flanking Region,Open chromatin,	1	249	lnc-ZEB1-9	lnc-ZEB1-9:1	x	NONHSAG005550.1	NONHSAT012617.1	x	AL161935.3	ENST00000433770.1	i	yes
MN297331	LHRI_LNC62.1	LHRI_LNC62	15	99455303	99455724	+	15:99455303-99455724:+	NA	NA	NA	M1,M0,	Promoter Flanking Region,	1	422	-	-	u	NONHSAG070604.1	NONHSAT171318.1	c	-	-	u
MN298174	LHRI_LNC1034.1	LHRI_LNC1034	5	42952869	42954017	+	5:42952869-42954017:+	NA	M0,M1,	NA	M0,	CTCF Binding Site,Promoter Flanking Region,	1	1149	lnc-ZNF131-4	lnc-ZNF131-4:8	c	NONHSAG040291.2	NONHSAT101238.2	c	-	-	u
MN297670	LHRI_LNC475.1	LHRI_LNC475	2	73754686	73755077	-	2:73754686-73755077:-	NA	NA	M2,M0,M1,	NA	Open chromatin,CTCF Binding Site,	1	392	lnc-C2orf78-3	lnc-C2orf78-3:1	x	NONHSAG028184.2	NONHSAT071632.2	x	-	-	u
MN297590	LHRI_LNC369.1	LHRI_LNC369	19	41261475	41262373	-	19:41261475-41262373:-	AXL	M1,M0,	NA	M1,M0,	Promoter,	1	899	lnc-TGFB1-6	lnc-TGFB1-6:2	c	-	-	u	-	-	u
MN298256	LHRI_LNC1138.11	LHRI_LNC1138	6	6697584	6801246	-	6:6697584-6801246:-	AL031123.1,BTF3P7	NA	M2,	M0,M1,	Enhancer,Promoter Flanking Region,	6	8561	lnc-F13A1-3	lnc-F13A1-3:22	j	NONHSAG042935.2	NONHSAT107561.2	j	AL031123.1	ENST00000648205.1	j	yes
MN297199	LHRI_LNC2003.1	LHRI_LNC2003	12	124565620	124566067	-	12:124565620-124566067:-	NCOR2	M0,M1,	M0,M1,M2,	M1,M0,	Promoter,	1	448	lnc-RFLNA-4	lnc-RFLNA-4:2	x	NONHSAG012632.1	NONHSAT031628.1	x	-	-	u
MN297278	LHRI_LNC2103.11	LHRI_LNC2103	15	30484544	30487168	+	15:30484544-30487168:+	AC127502.1,AC127502.3	NA	M2,M0,M1,	NA	Open chromatin,Promoter Flanking Region,Enhancer,	3	1377	lnc-GOLGA8Q-4	lnc-GOLGA8Q-4:3	j	NONHSAG016409.2	NONHSAT041358.2	j	-	-	u
MN297341	LHRI_LNC71.1	LHRI_LNC71	16	2132290	2132517	+	16:2132290-2132517:+	PKD1	M1,	M1,M0,M2,	NA	Enhancer,	1	228	-	-	u	-	-	u	-	-	u		Yes
MK280230	LHRI_LNC216.1	LHRI_LNC216	17	43230694	43235440	+	17:43230694-43235440:+	RNU2-1	NA	M0,M1,M2,	NA	Promoter,	2	1716	lnc-LINC00854-1	lnc-LINC00854-1:24	i	NONHSAG021878.2	NONHSAT053833.2	i	-	-	u
MN296977	LHRI_LNC1729.1	LHRI_LNC1729	10	45727296	45727564	-	10:45727296-45727564:-	WASHC2C	M1,M0,	M1,M0,M2,	M0,	Promoter,	1	269	lnc-ZFAND4-4	lnc-ZFAND4-4:1	i	NONHSAG060471.1	NONHSAT155452.1	x	-	-	u
MN297086	LHRI_LNC1859.1	LHRI_LNC1859	11	72161645	72209241	-	11:72161645-72209241:-	AP000812.1	NA	M1,M0,M2,	NA	CTCF Binding Site,Promoter Flanking Region,	3	2006	lnc-PHOX2A-3	lnc-PHOX2A-3:1	j	NONHSAG008973.2	NONHSAT022760.2	j	AP000812.1	ENST00000378140.3	j	yes
MN296807	LHRI_LNC2084.1	LHRI_LNC2084	1	43368231	43369187	+	1:43368231-43369187:+	NA	M0,M1,	M2,M0,M1,	M1,M0,	Promoter,	1	957	lnc-CDC20-2	lnc-CDC20-2:5	c	NONHSAG056390.1	NONHSAT148831.1	e	-	-	u
MN297301	LHRI_LNC2126.2	LHRI_LNC2126	15	64876255	64882450	-	15:64876255-64882450:-	AC069368.1	NA	M2,M0,M1,	M1,M0,	Promoter Flanking Region,	2	2842	-	-	u	-	-	u	-	-	u		Yes
MN298681	LHRI_LNC1617.1	LHRI_LNC1617	X	2151057	2151538	-	X:2151057-2151538:-	NA	NA	M0,	NA	CTCF Binding Site,	1	482	-	-	u	-	-	u	-	-	u		Yes
MN298698	LHRI_LNC1647.1	LHRI_LNC1647	X	71150196	71198175	-	X:71150196-71198175:-	AL590764.1	NA	M2,	NA	Promoter,	4	673	lnc-ZMYM3-1	lnc-ZMYM3-1:2	j	NONHSAG054718.2	NONHSAT137434.2	j	AL590764.1	ENST00000450860.1	j	yes
MN298349	LHRI_LNC1225.1	LHRI_LNC1225	6	146841369	147204614	-	6:146841369-147204614:-	STXBP5-AS1	M1,M0,	NA	NA	Promoter,	12	3163	STXBP5-AS1	STXBP5-AS1:6	j	NONHSAG045089.2	NONHSAT115441.2	j	STXBP5-AS1	ENST00000367477.7	j	yes
MN296804	LHRI_LNC1996.1	LHRI_LNC1996	1	34977496	34977789	-	1:34977496-34977789:-	AC114490.1	NA	M2,M0,M1,	NA	Open chromatin,	1	294	lnc-TMEM35B-1	lnc-TMEM35B-1:3	i	-	-	u	-	-	u
MN298299	LHRI_LNC1168.2	LHRI_LNC1168	6	33465471	33492910	+	6:33465471-33492910:+	NA	NA	M1,	NA	NA	3	2949	-	-	u	-	-	u	-	-	u		Yes
MN298084	LHRI_LNC927.1	LHRI_LNC927	4	1856370	1856581	+	4:1856370-1856581:+	NA	M0,M1,	M2,	NA	Promoter,	1	212	-	-	u	NONHSAG037281.1	NONHSAT094745.1	i	-	-	u
MN297671	LHRI_LNC478.1	LHRI_LNC478	2	78790990	78791200	+	2:78790990-78791200:+	NA	NA	M2,	NA	NA	1	211	lnc-REG3G-12	lnc-REG3G-12:1	c	NONHSAG077498.1	NONHSAT182076.1	c	-	-	u
MK279999	LHRI_LNC1609.2	LHRI_LNC1609	1	244815771	244835187	+	1:244815771-244835187:+	NA	NA	NA	NA	Promoter Flanking Region,	3	1002	lnc-COX20-1	lnc-COX20-1:1	j	NONHSAG004866.2	NONHSAT010652.2	j	-	-	u
MN297658	LHRI_LNC449.1	LHRI_LNC449	2	47690705	47691210	-	2:47690705-47691210:-	AC079250.1	NA	M2,M0,M1,	NA	NA	2	209	lnc-FBXO11-4	lnc-FBXO11-4:1	y	NONHSAG027699.2	NONHSAT070592.2	y	-	-	u
MK280321	LHRI_LNC558.7	LHRI_LNC558	2	178413999	178434091	+	2:178413999-178434091:+	AC009948.1	M0,M1,	NA	NA	Promoter,	3	5349	lnc-PJVK-2	lnc-PJVK-2:4	j	NONHSAG029952.2	NONHSAT075745.2	j	AC009948.1	ENST00000453026.6	j	Yes?
MN298287	LHRI_LNC1162.1	LHRI_LNC1162	6	30286694	30287010	-	6:30286694-30287010:-	HLA-L	NA	M2,M1,M0,	NA	CTCF Binding Site,	1	317	lnc-TRIM26-2	lnc-TRIM26-2:40	c	NONHSAG043403.2	NONHSAT108610.2	e	HCG17	ENST00000453558.1	i	yes
MN297791	LHRI_LNC627.1	LHRI_LNC627	20	15893537	15894293	-	20:15893537-15894293:-	MACROD2	NA	M2,	NA	Open chromatin,	1	757	lnc-KIF16B-41	lnc-KIF16B-41:1	e	NONHSAG081813.1	NONHSAT189368.1	e	-	-	u
MN297024	LHRI_LNC1797.1	LHRI_LNC1797	11	796718	796943	+	11:796718-796943:+	SLC25A22	M0,M1,	M1,M0,M2,	NA	Promoter,	1	226	-	-	u	-	-	u	-	-	u		Yes
MN298134	LHRI_LNC988.1	LHRI_LNC988	4	139041108	139041340	-	4:139041108-139041340:-	NOCT	NA	M2,M1,M0,	NA	Open chromatin,	1	233	lnc-ELF2-4	lnc-ELF2-4:1	i	NONHSAG038927.1	NONHSAT098416.1	x	-	-	u
MK280433	LHRI_LNC910.1	LHRI_LNC910	3	196321234	196321465	+	3:196321234-196321465:+	TM4SF19	NA	M0,M1,M2,	NA	Open chromatin,Promoter,	1	232	lnc-TM4SF19-TCTEX1D2-4	lnc-TM4SF19-TCTEX1D2-4:1	x	NONHSAG037108.2	NONHSAT094327.2	i	TM4SF19-AS1	ENST00000452051.1	i	yes
MN298611	LHRI_LNC1523.8	LHRI_LNC1523	9	72196304	72291839	-	9:72196304-72291839:-	GDA,AL135924.1,NA	NA	M0,M2,	M0,	CTCF Binding Site,Promoter Flanking Region,	4	526	lnc-GDA-3	lnc-GDA-3:1	x	NONHSAG052553.2	NONHSAT131854.2	x	AL135924.2	ENST00000427901.1	x	yes
MN297699	LHRI_LNC517.6	LHRI_LNC517	2	111207669	111495020	-	2:111207669-111495020:-	MIR4435-2HG,AC017002.6	NA	M1,M2,	M0,M1,M2,	Promoter,	6	1771	MIR4435-2HG	MIR4435-2HG:43	j	NONHSAG056025.2	NONHSAT073620.2	j	MIR4435-2HG	ENST00000643013.1	j	yes
MN297309	LHRI_LNC2133.1	LHRI_LNC2133	15	70099225	70099527	-	15:70099225-70099527:-	NA	M1,M0,	NA	M0,	Promoter,	1	303	-	-	u	-	-	u	-	-	u		Yes
MK280374	LHRI_LNC707.6	LHRI_LNC707	21	44921076	44928596	+	21:44921076-44928596:+	ITGB2-AS1	M1,M0,	M0,M1,M2,	M1,M0,	Promoter,	3	2052	ITGB2-AS1	ITGB2-AS1:5	j	NONHSAG033056.2	NONHSAT082899.2	j	ITGB2-AS1	ENST00000609694.5	j	yes
MK280022	LHRI_LNC1756.1	LHRI_LNC1756	10	87010873	87013212	+	10:87010873-87013212:+	AL136982.2	NA	M0,M1,M2,	NA	NA	1	2340	lnc-GLUD1-1	lnc-GLUD1-1:1	i	NONHSAG061427.1	NONHSAT157288.1	x	AL136982.2	ENST00000451760.1	x	yes
MN297275	LHRI_LNC2102.1	LHRI_LNC2102	15	30470691	30470970	-	15:30470691-30470970:-	AC127502.1	M0,M1,	M2,	NA	Promoter Flanking Region,Promoter,	1	280	-	-	u	NONHSAG016402.1	NONHSAT041336.1	i	-	-	u
MN297391	LHRI_LNC146.1	LHRI_LNC146	16	74295855	74296071	-	16:74295855-74296071:-	AC138627.1	M1,M0,	M2,M1,M0,	M0,M1,	Promoter,	1	217	lnc-ZFHX3-27	lnc-ZFHX3-27:6	c	NONHSAG019962.2	NONHSAT143654.2	i	AC138627.1	ENST00000641560.1	i	yes
MN297960	LHRI_LNC782.1	LHRI_LNC782	3	22158521	22158756	-	3:22158521-22158756:-	ZNF385D	NA	M1,	NA	Open chromatin,	1	236	lnc-ZNF385D-3	lnc-ZNF385D-3:3	i	NONHSAG034593.1	NONHSAT088647.1	i	-	-	u
MN297349	LHRI_LNC83.1	LHRI_LNC83	16	8858807	8859006	+	16:8858807-8859006:+	CARHSP1	NA	M2,M1,M0,	NA	Enhancer,	1	200	lnc-USP7-3	lnc-USP7-3:2	x	NONHSAG018523.2	NONHSAT140417.2	i	AC022167.2	ENST00000565934.1	i	yes
MN298192	LHRI_LNC1058.1	LHRI_LNC1058	5	77155918	77160959	+	5:77155918-77160959:+	AC022414.1	NA	M0,M1,M2,	NA	NA	1	5042	ZBED3-AS1	ZBED3-AS1:18	i	NONHSAG040784.2	NONHSAT202777.1	i	ZBED3-AS1	ENST00000508401.1	i	yes
MK280080	LHRI_LNC1881.5	LHRI_LNC1881	11	110375539	110407665	+	11:110375539-110407665:+	AP000924.1	NA	NA	M0,M1,	Promoter Flanking Region,	3	1722	lnc-FDX1-1	lnc-FDX1-1:1	j	NONHSAG009576.2	NONHSAT024073.2	j	AP000924.1	ENST00000526605.5	j	Yes?
MN298715	LHRI_LNC1676.6	LHRI_LNC1676	X	131736143	131786035	-	X:131736143-131786035:-	FIRRE	NA	M2,	NA	Promoter Flanking Region,	9	1125	FIRRE	FIRRE:12	j	NONHSAG055315.2	NONHSAT138539.2	j	FIRRE	ENST00000427391.2	j	yes
MN298292	LHRI_LNC1164.1	LHRI_LNC1164	6	32862762	32863047	+	6:32862762-32863047:+	NA	NA	M0,M1,M2,	NA	Promoter Flanking Region,	1	286	-	-	u	NONHSAG043577.1	NONHSAT108945.1	e	-	-	u
MN298297	LHRI_LNC1169.1	LHRI_LNC1169	6	33450060	33450322	-	6:33450060-33450322:-	SYNGAP1	NA	M2,M1,M0,	NA	Promoter Flanking Region,	1	263	SYNGAP1-AS1	SYNGAP1-AS1:9	c	NONHSAG043608.2	NONHSAT209012.1	i	SYNGAP1-AS1	ENST00000630418.1	i	yes
MN298083	LHRI_LNC926.1	LHRI_LNC926	4	772761	773195	-	4:772761-773195:-	AC139887.2	NA	M2,M0,M1,	NA	Open chromatin,	1	435	lnc-CPLX1-2	lnc-CPLX1-2:15	c	NONHSAG037225.1	NONHSAT094617.1	c	AC139887.2	ENST00000507446.1	i	yes
MN297366	LHRI_LNC106.1	LHRI_LNC106	16	29930568	29930805	+	16:29930568-29930805:+	AC120114.1	NA	NA	NA	NA	1	238	lnc-ASPHD1-1	lnc-ASPHD1-1:5	c	NONHSAG019061.2	NONHSAT141672.2	p	AC120114.1	ENST00000450909.3	p	yes
MN298315	LHRI_LNC1197.1	LHRI_LNC1197	6	81737488	81737690	-	6:81737488-81737690:-	TENT5A	NA	NA	NA	NA	1	203	-	-	u	-	-	u	-	-	u		Yes
MN296936	LHRI_LNC1442.1	LHRI_LNC1442	1	226627413	226627758	-	1:226627413-226627758:-	NA	NA	M0,M1,M2,	NA	CTCF Binding Site,Promoter Flanking Region,	1	346	-	-	u	-	-	u	-	-	u		Yes
MN297414	LHRI_LNC175.1	LHRI_LNC175	17	8364162	8364716	-	17:8364162-8364716:-	NA	NA	M2,M0,M1,	NA	Enhancer,Open chromatin,	1	555	-	-	u	-	-	u	-	-	u		Yes
MK280479	LHRI_LNC1122.1	LHRI_LNC1122	5	177614216	177617271	-	5:177614216-177617271:-	AC139795.2	NA	M0,M1,M2,	NA	NA	1	3056	lnc-B4GALT7-1	lnc-B4GALT7-1:1	x	NONHSAG042392.1	NONHSAT105522.1	o	AC139795.2	ENST00000499900.2	i	yes
MK280104	LHRI_LNC1941.3	LHRI_LNC1941	12	46384107	46652577	+	12:46384107-46652577:+	AC008014.1	NA	NA	M1,M0,	Promoter,	5	736	lnc-PCED1B-5	lnc-PCED1B-5:31	j	NONHSAG010988.2	NONHSAT162119.1	j	AC008014.1	ENST00000551503.5	j	yes
MN297420	LHRI_LNC182.1	LHRI_LNC182	17	18002968	18003281	-	17:18002968-18003281:-	DRC3	NA	M1,M0,M2,	NA	Open chromatin,CTCF Binding Site,	1	314	lnc-TOM1L2-8	lnc-TOM1L2-8:1	e	NONHSAG021033.2	NONHSAT146130.2	e	-	-	u
MN296985	LHRI_LNC1740.1	LHRI_LNC1740	10	72092215	72092794	-	10:72092215-72092794:-	NA	NA	M0,M1,M2,	NA	NA	1	580	-	-	u	-	-	u	-	-	u		Yes
MN298403	LHRI_LNC1286.14	LHRI_LNC1286	7	66553805	66592386	-	7:66553805-66592386:-	AC006001.3,AC006001.4	M0,M1,	M1,M0,M2,	M0,M1,	Promoter Flanking Region,CTCF Binding Site,	3	1325	lnc-SBDS-4	lnc-SBDS-4:5	j	NONHSAG047862.1	NONHSAT121261.1	k	-	-	u
MN296797	LHRI_LNC1813.1	LHRI_LNC1813	1	22102788	22103024	+	1:22102788-22103024:+	AL031281.2	NA	M2,M1,M0,	NA	Open chromatin,	1	237	lnc-WNT4-3	lnc-WNT4-3:1	i	NONHSAG000630.2	NONHSAT001475.2	i	-	-	u
MK279958	LHRI_LNC350.1	LHRI_LNC350	1	110315472	110315754	-	1:110315472-110315754:-	RBM15-AS1	NA	NA	NA	NA	1	283	RBM15-AS1	RBM15-AS1:25	c	NONHSAG002351.1	NONHSAT005064.1	x	RBM15-AS1	ENST00000449169.1	i	yes
MN297624	LHRI_LNC417.1	LHRI_LNC417	2	16908615	16911902	-	2:16908615-16911902:-	NA	NA	NA	NA	NA	2	989	-	-	u	NONHSAG027097.1	NONHSAT069344.1	x	-	-	u
MN296970	LHRI_LNC1719.2	LHRI_LNC1719	10	33333885	33334666	+	10:33333885-33334666:+	NRP1	M1,M0,	M2,M1,M0,	M0,M1,M2,	Promoter,	2	648	-	-	u	NONHSAG005579.1	NONHSAT012667.1	i	-	-	u
MN298407	LHRI_LNC1288.22	LHRI_LNC1288	7	66654586	66701485	+	7:66654586-66701485:+	AC006001.2	M1,M0,	M2,M1,M0,	M2,M1,M0,	Promoter,	2	758	lnc-KCTD7-2	lnc-KCTD7-2:12	j	NONHSAG047850.2	NONHSAT121214.2	j	AC006001.2	ENST00000439360.5	j	yes
MN297778	LHRI_LNC615.1	LHRI_LNC615	20	1524051	1524515	-	20:1524051-1524515:-	AL049634.1	NA	NA	NA	Promoter Flanking Region,	1	465	-	-	u	-	-	u	-	-	u		Yes
MN297392	LHRI_LNC148.1	LHRI_LNC148	16	74323760	74359910	-	16:74323760-74359910:-	AC009053.1	NA	M2,M1,M0,	NA	NA	2	670	lnc-PSMD7-2	lnc-PSMD7-2:1	x	NONHSAG019968.1	NONHSAT143674.1	o	AC009120.2	ENST00000565313.1	y	yes
MN298089	LHRI_LNC934.1	LHRI_LNC934	4	4550256	4552932	+	4:4550256-4552932:+	STX18-AS1	NA	M2,M0,M1,	NA	NA	1	2677	STX18-AS1	STX18-AS1:13	c	NONHSAG037369.2	NONHSAT094938.2	x	STX18-AS1	ENST00000610009.5	i	yes
MN297884	LHRI_LNC690.1	LHRI_LNC690	21	29367316	29367826	+	21:29367316-29367826:+	BACH1	NA	M1,M0,M2,	NA	NA	1	511	-	-	u	-	-	u	-	-	u		Yes
MN298527	LHRI_LNC1434.7	LHRI_LNC1434	8	103121032	103136265	+	8:103121032-103136265:+	LINC01181	NA	M1,	NA	Open chromatin,	3	2126	LINC01181	LINC01181:3	j	NONHSAG050978.2	NONHSAT128155.2	j	LINC01181	ENST00000503718.2	j	yes
MK280613	LHRI_LNC1500.1	LHRI_LNC1500	9	40665612	40747050	-	9:40665612-40747050:-	NA	NA	NA	NA	Enhancer,	2	1424	lnc-FOXD4L6-22	lnc-FOXD4L6-22:1	j	NONHSAG052418.2	NONHSAT131555.2	j	-	-	u
MN298029	LHRI_LNC853.1	LHRI_LNC853	3	121921498	121921790	+	3:121921498-121921790:+	SLC15A2	NA	M0,M1,M2,	NA	NA	1	293	-	-	u	-	-	u	-	-	u		Yes
MN297607	LHRI_LNC387.1	LHRI_LNC387	19	51582756	51583238	+	19:51582756-51583238:+	ZNF175	NA	M1,M0,M2,	NA	NA	1	483	-	-	u	-	-	u	-	-	u		Yes
MN296931	LHRI_LNC1369.1	LHRI_LNC1369	1	217617186	217617522	-	1:217617186-217617522:-	GPATCH2	NA	M2,M1,M0,	NA	NA	1	337	-	-	u	-	-	u	-	-	u		Yes
MN298680	LHRI_LNC1616.1	LHRI_LNC1616	X	1661847	1730972	+	X:1661847-1730972:+	NA	NA	NA	NA	Promoter Flanking Region,	3	389	lnc-ASMT-1	lnc-ASMT-1:1	j	NONHSAG053924.2	NONHSAT136067.2	j	-	-	u
MK280415	LHRI_LNC844.1	LHRI_LNC844	3	108125043	108138727	+	3:108125043-108138727:+	LINC01215	NA	NA	NA	Promoter Flanking Region,	3	2721	LINC01215	LINC01215:1	j	NONHSAG035685.2	NONHSAT091078.2	j	LINC01215	ENST00000607746.1	j	yes
MN297496	LHRI_LNC249.1	LHRI_LNC249	17	60130444	60131320	-	17:60130444-60131320:-	AC025048.2	NA	M1,M0,M2,	NA	NA	1	877	lnc-USP32-2	lnc-USP32-2:12	c	NONHSAG022378.2	NONHSAT055075.2	i	AC025048.2	ENST00000590744.1	i	yes
MN298571	LHRI_LNC1485.1	LHRI_LNC1485	9	27533306	27539482	-	9:27533306-27539482:-	AL451123.1	NA	M0,M1,M2,	NA	Promoter Flanking Region,	1	6177	lnc-IFNK-1	lnc-IFNK-1:2	x	NONHSAG051964.1	NONHSAT130617.1	x	AL451123.1	ENST00000645861.1	x	yes
MN297544	LHRI_LNC302.1	LHRI_LNC302	18	77131559	77132709	+	18:77131559-77132709:+	MBP	M1,M0,	M2,M1,M0,	M0,M1,M2,	Promoter,	1	1151	lnc-MBP-13	lnc-MBP-13:3	i	-	-	u	-	-	u
MN298278	LHRI_LNC1146.1	LHRI_LNC1146	6	26537509	26537813	+	6:26537509-26537813:+	NA	M0,M1,	M1,M2,	M0,	Promoter,Promoter Flanking Region,	1	305	-	-	u	-	-	u	-	-	u		Yes
MK279960	LHRI_LNC343.5	LHRI_LNC343	1	110508127	110570766	+	1:110508127-110570766:+	KCNA2,KCNA3	NA	M0,M2,	M0,M1,	Promoter Flanking Region,	4	2169	lnc-PROK1-4	lnc-PROK1-4:3	j	NONHSAG058027.1	NONHSAT152080.1	x	-	-	u
MN297561	LHRI_LNC324.1	LHRI_LNC324	19	11583508	11583985	-	19:11583508-11583985:-	ZNF627	NA	M1,M2,	M0,	Promoter Flanking Region,	1	478	-	-	u	-	-	u	-	-	u		Yes
MN298300	LHRI_LNC1170.1	LHRI_LNC1170	6	33789452	33789713	+	6:33789452-33789713:+	NA	M1,M0,	M1,M2,	M1,M2,M0,	Open chromatin,Promoter,	1	262	-	-	u	-	-	u	-	-	u		Yes
MN296913	LHRI_LNC1258.1	LHRI_LNC1258	1	204567810	204573708	+	1:204567810-204573708:+	NA	NA	M1,M0,M2,	NA	Enhancer,	3	208	-	-	u	NONHSAG004034.1	NONHSAT008958.1	y	-	-	u
MN297644	LHRI_LNC436.1	LHRI_LNC436	2	33553182	33556822	-	2:33553182-33556822:-	AC020594.1	NA	M0,M1,M2,	M1,M0,	Open chromatin,Promoter Flanking Region,	2	2334	lnc-FAM98A-1	lnc-FAM98A-1:1	j	NONHSAG027437.2	NONHSAT070018.2	j	AC020594.1	ENST00000437680.1	j	yes
MK280149	LHRI_LNC2089.2	LHRI_LNC2089	14	95185626	95191561	+	14:95185626-95191561:+	CLMN	NA	M0,M2,	M1,M0,	Promoter Flanking Region,	2	1653	lnc-DICER1-5	lnc-DICER1-5:2	x	NONHSAG015789.2	NONHSAT039429.2	x	AL356017.1	ENST00000556796.1	x	yes
MN297594	LHRI_LNC374.1	LHRI_LNC374	19	43670368	43680592	+	19:43670368-43680592:+	PLAUR	M0,M1,	M0,M1,M2,	M0,	Promoter,	2	223	-	-	u	NONHSAG025926.1	NONHSAT066585.1	x	-	-	u
MN297287	LHRI_LNC2111.3	LHRI_LNC2111	15	38004746	38025018	+	15:38004746-38025018:+	LINC02345	NA	NA	NA	CTCF Binding Site,Enhancer,Open chromatin,	2	425	LINC02345	LINC02345:27	j	NONHSAG016540.2	NONHSAT041699.2	j	LINC02345	ENST00000557883.2	j	yes
MN296799	LHRI_LNC1870.1	LHRI_LNC1870	1	25955972	25956485	-	1:25955972-25956485:-	NA	NA	M2,M1,M0,	NA	Open chromatin,CTCF Binding Site,	1	514	-	-	u	-	-	u	-	-	u		Yes
MN297703	LHRI_LNC517.27	LHRI_LNC517	2	111429323	111495046	-	2:111429323-111495046:-	MIR4435-2HG,AC017002.6	NA	M1,M2,	M2,M1,M0,	Promoter,	3	615	MIR4435-2HG	MIR4435-2HG:38	j	NONHSAG056025.2	NONHSAT073622.2	j	AC017002.6	ENST00000644013.1	j	yes
MN298455	LHRI_LNC1347.1	LHRI_LNC1347	7	139290370	139290575	+	7:139290370-139290575:+	UBN2	NA	M2,M0,M1,	NA	NA	1	206	-	-	u	-	-	u	-	-	u		Yes
MN297937	LHRI_LNC764.1	LHRI_LNC764	22	50541044	50543011	+	22:50541044-50543011:+	U62317.5	NA	NA	M1,M0,	Promoter Flanking Region,	2	858	lnc-KLHDC7B-2	lnc-KLHDC7B-2:1	k	NONHSAG083860.1	NONHSAT192583.1	k	U62317.4	ENST00000609268.1	k	Yes
MN296942	LHRI_LNC1538.2	LHRI_LNC1538	1	234957388	234980804	-	1:234957388-234980804:-	AL391832.2	M0,	NA	M0,M1,	NA	5	1161	lnc-TOMM20-2	lnc-TOMM20-2:19	j	NONHSAG004693.2	NONHSAT010318.2	j	AL391832.2	ENST00000418557.1	j	yes
MN297938	LHRI_LNC766.1	LHRI_LNC766	3	4977967	4978368	-	3:4977967-4978368:-	BHLHE40-AS1	M0,M1,	M2,M0,M1,	M0,M1,	Promoter,	1	402	lnc-SUMF1-4	lnc-SUMF1-4:1	c	NONHSAG034318.2	NONHSAT087647.2	c	BHLHE40-AS1	ENST00000620618.4	i	yes
MN298231	LHRI_LNC1114.1	LHRI_LNC1114	5	160458869	160459224	-	5:160458869-160459224:-	MIR3142HG	NA	M0,M2,	NA	Enhancer,TF binding site,CTCF Binding Site,	1	356	MIR3142HG	MIR3142HG:4	i	-	-	u	MIR3142HG	ENST00000642173.1	i	yes
MN297223	LHRI_LNC2041.1	LHRI_LNC2041	14	20343081	20343406	+	14:20343081-20343406:+	AL355075.4	M1,	M0,M1,M2,	NA	Promoter,	1	326	lnc-CCNB1IP1-1	lnc-CCNB1IP1-1:4	x	NONHSAG014362.2	NONHSAT035568.2	x	AL355075.4	ENST00000554988.1	x	yes
MN297446	LHRI_LNC209.1	LHRI_LNC209	17	38701661	38704747	+	17:38701661-38704747:+	AC006449.6	M0,M1,	NA	M1,M0,	Promoter,	2	2213	lnc-MLLT6-1	lnc-MLLT6-1:1	o	NONHSAG021662.2	NONHSAT053349.2	o	AC006449.6	ENST00000612330.1	o	yes
MN297023	LHRI_LNC1796.1	LHRI_LNC1796	11	796051	796253	+	11:796051-796253:+	SLC25A22	M1,M0,	M1,M0,M2,	NA	Promoter,	1	203	lnc-PIDD1-1	lnc-PIDD1-1:2	x	NONHSAG007349.1	NONHSAT017327.1	x	-	-	u
MN298064	LHRI_LNC901.1	LHRI_LNC901	3	186371142	186401718	-	3:186371142-186401718:-	NA	NA	NA	NA	NA	3	2181	-	-	u	NONHSAG036914.1	NONHSAT093836.1	o	-	-	u
MN297768	LHRI_LNC592.1	LHRI_LNC592	2	216498006	216498414	-	2:216498006-216498414:-	RPL37A	M1,M0,	M1,M0,M2,	M0,M1,	Promoter Flanking Region,Promoter,	1	409	lnc-MARCH4-2	lnc-MARCH4-2:10	c	NONHSAG030456.1	NONHSAT076769.1	x	AC098820.1	ENST00000453157.1	i	yes
MN298326	LHRI_LNC1216.1	LHRI_LNC1216	6	134296193	134296771	+	6:134296193-134296771:+	SGK1	NA	NA	M1,M0,	Promoter Flanking Region,TF binding site,	1	579	-	-	u	-	-	u	-	-	u		Yes
MK280554	LHRI_LNC1300.1	LHRI_LNC1300	7	83471220	83471582	-	7:83471220-83471582:-	SEMA3E	NA	M1,M0,M2,	NA	Open chromatin,	1	363	-	-	u	-	-	u	-	-	u		Yes
MN297386	LHRI_LNC141.1	LHRI_LNC141	16	73042425	73043170	-	16:73042425-73043170:-	ZFHX3	NA	M1,M2,	NA	TF binding site,	1	746	-	-	u	-	-	u	-	-	u		Yes
MN296887	LHRI_LNC888.1	LHRI_LNC888	1	160284366	160285885	+	1:160284366-160285885:+	PEX19	M0,M1,	M0,M1,M2,	M1,M0,	Promoter,	2	811	lnc-NCSTN-3	lnc-NCSTN-3:1	j	NONHSAG056907.1	NONHSAT149936.1	y	-	-	u
MN298082	LHRI_LNC925.1	LHRI_LNC925	4	771465	772318	-	4:771465-772318:-	AC139887.2	NA	M2,M0,M1,	NA	Open chromatin,	1	854	lnc-CPLX1-2	lnc-CPLX1-2:8	c	NONHSAG037225.1	NONHSAT094617.1	c	AC139887.2	ENST00000507446.1	i	yes
MN297836	LHRI_LNC670.1	LHRI_LNC670	20	62530664	62531836	+	20:62530664-62531836:+	NA	NA	NA	NA	Open chromatin,	1	1173	-	-	u	NONHSAG032315.1	NONHSAT080955.1	i	-	-	u
MN296837	LHRI_LNC355.1	LHRI_LNC355	1	110409212	110409581	+	1:110409212-110409581:+	LAMTOR5-AS1	M0,M1,	M1,M0,M2,	M0,	Promoter,	1	370	LAMTOR5-AS1	LAMTOR5-AS1:19	c	NONHSAG002378.2	NONHSAT005118.2	c	LAMTOR5-AS1	ENST00000610148.5	i	yes
MN298590	LHRI_LNC1508.11	LHRI_LNC1508	9	40992317	41043947	+	9:40992317-41043947:+	FRG1HP	M0,M1,	M2,M1,M0,	M1,M2,M0,	Promoter,	9	11445	lnc-ANKRD20A2-22	lnc-ANKRD20A2-22:2	j	NONHSAG052454.2	NONHSAT131633.2	j	AL353763.2	ENST00000623489.1	y	Yes?
MN297118	LHRI_LNC1901.1	LHRI_LNC1901	12	3800424	3800900	-	12:3800424-3800900:-	PARP11	NA	M1,M0,M2,	NA	NA	1	477	lnc-CRACR2A-6	lnc-CRACR2A-6:1	e	NONHSAG010226.2	NONHSAT025928.2	e	-	-	u
MN297657	LHRI_LNC451.1	LHRI_LNC451	2	47070941	47071285	-	2:47070941-47071285:-	TTC7A	NA	M2,M1,M0,	M0,M1,	Promoter Flanking Region,	1	345	lnc-EPCAM-6	lnc-EPCAM-6:1	x	NONHSAG027675.1	NONHSAT070529.1	x	AC073283.1	ENST00000421759.1	x	yes
MN296892	LHRI_LNC994.1	LHRI_LNC994	1	169389756	169390094	+	1:169389756-169390094:+	BLZF1	NA	M0,M1,M2,	NA	NA	1	339	-	-	u	-	-	u	-	-	u		Yes
MN297762	LHRI_LNC585.8	LHRI_LNC585	2	207662385	207679117	+	2:207662385-207679117:+	LINC01857	NA	M2,	NA	Promoter Flanking Region,	4	1254	LINC01857	LINC01857:11	j	NONHSAG030374.2	NONHSAT076616.2	j	LINC01857	ENST00000429730.1	j	yes
MN298214	LHRI_LNC1085.1	LHRI_LNC1085	5	132451776	132452028	+	5:132451776-132452028:+	AC116366.3	NA	M1,M0,M2,	NA	Enhancer,	1	253	lnc-SLC22A5-6	lnc-SLC22A5-6:5	i	-	-	u	C5orf56	ENST00000407797.6	i	yes
MN298196	LHRI_LNC1060.1	LHRI_LNC1060	5	80256167	80256462	-	5:80256167-80256462:-	NA	M1,M0,	M1,M2,	M0,M1,	Promoter,	1	296	lnc-SPZ1-1	lnc-SPZ1-1:3	x	NONHSAG040864.1	NONHSAT102423.1	o	-	-	u
MN297686	LHRI_LNC494.1	LHRI_LNC494	2	96058327	96063821	+	2:96058327-96063821:+	NA	NA	NA	NA	CTCF Binding Site,	4	1996	-	-	u	-	-	u	-	-	u		Yes
MK280340	LHRI_LNC630.7	LHRI_LNC630	20	17658880	17659975	+	20:17658880-17659975:+	RRBP1	NA	M1,M0,M2,	NA	Promoter Flanking Region,	3	826	lnc-BFSP1-4	lnc-BFSP1-4:1	x	NONHSAG031342.2	NONHSAT189382.1	x	-	-	u
MN298674	LHRI_LNC1596.1	LHRI_LNC1596	9	137486725	137486941	-	9:137486725-137486941:-	PNPLA7	NA	NA	NA	NA	1	217	lnc-NSMF-2	lnc-NSMF-2:1	p	NONHSAG053871.2	NONHSAT135731.2	p	-	-	u
MN298373	LHRI_LNC1249.2	LHRI_LNC1249	7	602086	608482	+	7:602086-608482:+	AC147651.4	NA	NA	M1,M0,	Promoter Flanking Region,	4	811	lnc-DNAAF5-1	lnc-DNAAF5-1:2	j	NONHSAG046737.2	NONHSAT211528.1	j	AC147651.3	ENST00000429872.1	j	yes
MN297951	LHRI_LNC772.13	LHRI_LNC772	3	11202596	11225919	-	3:11202596-11225919:-	HRH1	M1,M0,	M1,M0,M2,	M0,M1,	Open chromatin,Promoter,Enhancer,	4	4795	lnc-VGLL4-9	lnc-VGLL4-9:3	j	NONHSAG085340.1	NONHSAT195410.1	j	AC083855.2	ENST00000648436.1	j	yes
MN298624	LHRI_LNC1527.1	LHRI_LNC1527	9	85543582	85544268	-	9:85543582-85544268:-	NA	NA	M0,M2,	NA	Open chromatin,	1	687	-	-	u	-	-	u	-	-	u		Yes
MN298090	LHRI_LNC936.1	LHRI_LNC936	4	6908949	6909568	-	4:6908949-6909568:-	TBC1D14	M0,M1,	M2,M0,	M1,M0,	CTCF Binding Site,Promoter,	1	620	lnc-CCDC96-3	lnc-CCDC96-3:1	c	NONHSAG037405.2	NONHSAT095025.2	c	-	-	u
MN297604	LHRI_LNC385.1	LHRI_LNC385	19	49964691	49969600	-	19:49964691-49969600:-	NA	NA	NA	NA	Promoter Flanking Region,Open chromatin,	2	328	-	-	u	-	-	u	-	-	u		Yes
MN297891	LHRI_LNC700.1	LHRI_LNC700	21	36430091	36497893	+	21:36430091-36497893:+	AP000695.1	NA	M2,M0,M1,	NA	Promoter,Promoter Flanking Region,	3	1046	lnc-CHAF1B-3	lnc-CHAF1B-3:1	j	NONHSAG082908.1	NONHSAT190946.1	k	AP000695.1	ENST00000429588.1	j	yes
MN298046	LHRI_LNC876.1	LHRI_LNC876	3	150586460	150586678	+	3:150586460-150586678:+	SERP1	NA	M1,M0,M2,	NA	NA	1	219	lnc-SERP1-1	lnc-SERP1-1:1	i	NONHSAG036394.1	NONHSAT092712.1	i	-	-	u
MN297293	LHRI_LNC2116.1	LHRI_LNC2116	15	42638367	42638678	+	15:42638367-42638678:+	STARD9	NA	M2,M0,M1,	NA	NA	1	312	-	-	u	-	-	u	-	-	u		Yes
MN297102	LHRI_LNC1882.4	LHRI_LNC1882	11	110371786	110377922	-	11:110371786-110377922:-	AP000924.1	NA	NA	M0,M1,	Promoter Flanking Region,	2	457	lnc-FDX1-1	lnc-FDX1-1:1	i	NONHSAG009576.2	NONHSAT024072.2	i	AP000924.1	ENST00000526605.5	i	Yes?
MN297697	LHRI_LNC512.1	LHRI_LNC512	2	108498520	108499072	-	2:108498520-108499072:-	GCC2	NA	M2,M1,M0,	NA	NA	1	553	GCC2-AS1	GCC2-AS1:6	c	NONHSAG028882.2	NONHSAT185316.1	i	-	-	u
MN298115	LHRI_LNC961.1	LHRI_LNC961	4	74041507	74042011	+	4:74041507-74042011:+	NA	M0,	NA	M0,	Promoter,	1	505	lnc-MTHFD2L-4	lnc-MTHFD2L-4:4	c	NONHSAG087616.1	NONHSAT198714.1	c	-	-	u
MN297369	LHRI_LNC112.1	LHRI_LNC112	16	31253793	31257805	+	16:31253793-31257805:+	NA	NA	M2,	NA	Promoter Flanking Region,	3	345	-	-	u	NONHSAG071614.1	NONHSAT172885.1	j	-	-	u
MN296919	LHRI_LNC1301.1	LHRI_LNC1301	1	207860512	207860913	-	1:207860512-207860913:-	MIR29B2CHG	NA	M2,M1,M0,	NA	Open chromatin,	1	402	MIR29B2CHG	MIR29B2CHG:58	c	NONHSAG004138.2	NONHSAT009144.2	i	MIR29B2CHG	ENST00000637970.1	i	yes
MN298608	LHRI_LNC1523.5	LHRI_LNC1523	9	72178509	72291846	-	9:72178509-72291846:-	GDA,AL135924.1,NA	NA	M2,M0,	M0,	Promoter Flanking Region,CTCF Binding Site,	4	2607	lnc-GDA-3	lnc-GDA-3:1	x	NONHSAG052553.2	NONHSAT131854.2	x	AL135924.2	ENST00000427901.1	x	yes
MN297939	LHRI_LNC767.1	LHRI_LNC767	3	5802589	5802792	-	3:5802589-5802792:-	NA	NA	M0,M2,	NA	NA	1	204	-	-	u	-	-	u	-	-	u		Yes
MN296856	LHRI_LNC469.5	LHRI_LNC469	1	120415063	120424732	+	1:120415063-120424732:+	NA	M0,M1,	M1,M2,	NA	Promoter Flanking Region,	5	1084	-	-	u	-	-	u	-	-	u		Yes
MN297589	LHRI_LNC366.1	LHRI_LNC366	19	40003383	40003702	+	19:40003383-40003702:+	ZNF546	NA	M0,M1,M2,	NA	NA	1	320	-	-	u	-	-	u	-	-	u		Yes
MN298148	LHRI_LNC1008.1	LHRI_LNC1008	4	174323505	174363960	-	4:174323505-174363960:-	CEP44	NA	NA	NA	CTCF Binding Site,	2	438	lnc-CEP44-6	lnc-CEP44-6:1	x	NONHSAG088004.1	NONHSAT199418.1	x	AC116616.1	ENST00000508815.1	y	yes
MK280679	LHRI_LNC1688.1	LHRI_LNC1688	Y	3002912	3200449	+	Y:3002912-3200449:+	LINC00278	NA	NA	NA	NA	4	1376	LINC00278	LINC00278:3	j	NONHSAG055665.2	NONHSAT139305.2	j	LINC00278	ENST00000425031.1	j	yes
MN297292	LHRI_LNC2114.1	LHRI_LNC2114	15	40686122	40686603	-	15:40686122-40686603:-	RAD51-AS1	NA	M2,	NA	NA	1	482	RAD51-AS1	RAD51-AS1:11	c	NONHSAG016610.2	NONHSAT041865.2	o	RAD51-AS1	ENST00000650326.1	o	yes
MN296847	LHRI_LNC371.1	LHRI_LNC371	1	112967610	112967945	+	1:112967610-112967945:+	SLC16A1-AS1	NA	M2,M0,M1,	NA	NA	1	336	SLC16A1-AS1	SLC16A1-AS1:22	c	NONHSAG002458.2	NONHSAT005306.2	i	SLC16A1-AS1	ENST00000627431.2	i	yes
MN298244	LHRI_LNC1129.1	LHRI_LNC1129	6	356502	360454	+	6:356502-360454:+	NA	NA	M1,M0,	NA	TF binding site,CTCF Binding Site,	1	3953	-	-	u	-	-	u	-	-	u		Yes
MN297810	LHRI_LNC652.1	LHRI_LNC652	20	36044679	36044901	-	20:36044679-36044901:-	NORAD	NA	M0,M1,M2,	NA	Promoter Flanking Region,	1	223	NORAD	NORAD:1	p	NONHSAG031696.2	NONHSAT079548.2	p	NORAD	ENST00000565493.1	p	Yes
MK280156	LHRI_LNC2099.1	LHRI_LNC2099	15	30148147	30565657	+	15:30148147-30565657:+	CHRFAM7A	NA	M0,M1,M2,	NA	CTCF Binding Site,TF binding site,	2	580	lnc-GOLGA8R-2	lnc-GOLGA8R-2:2	x	NONHSAG016405.2	NONHSAT041347.2	x	AC019322.4	ENST00000623470.1	x	Yes?
MN296772	LHRI_LNC1878.1	LHRI_LNC1878	1	844068	844503	+	1:844068-844503:+	LINC01128	NA	M0,M1,M2,	NA	Promoter Flanking Region,Open chromatin,	1	436	LINC01128	LINC01128:91	o	NONHSAG000047.2	NONHSAT000175.2	o	LINC01128	ENST00000449005.5	i	Yes?
MN297758	LHRI_LNC586.1	LHRI_LNC586	2	207604550	207604807	+	2:207604550-207604807:+	METTL21A	NA	M0,M1,M2,	NA	NA	1	258	lnc-CREB1-2	lnc-CREB1-2:1	c	NONHSAG030371.2	NONHSAT076612.2	c	-	-	u
MN298345	LHRI_LNC1220.1	LHRI_LNC1220	6	140845958	140898477	-	6:140845958-140898477:-	AL035446.1	NA	M2,	NA	Promoter Flanking Region,	3	743	lnc-NMBR-2	lnc-NMBR-2:2	j	NONHSAG045005.2	NONHSAT115288.2	j	AL035446.2	ENST00000650553.1	j	yes
MN297618	LHRI_LNC405.1	LHRI_LNC405	19	56564247	56564475	+	19:56564247-56564475:+	AC005498.3	NA	M1,M2,	NA	Promoter,CTCF Binding Site,	1	229	lnc-ZNF667-2	lnc-ZNF667-2:2	i	NONHSAG026636.2	NONHSAT068173.2	i	AC005498.3	ENST00000596587.1	i	yes
MN297690	LHRI_LNC499.1	LHRI_LNC499	2	97124954	97125163	+	2:97124954-97125163:+	ANKRD36	NA	M0,M1,M2,	NA	NA	1	210	-	-	u	-	-	u	-	-	u		Yes
MK280260	LHRI_LNC301.3	LHRI_LNC301	18	77112640	77117635	+	18:77112640-77117635:+	AC018529.2	NA	M2,M1,M0,	M0,	Promoter Flanking Region,	2	2745	lnc-GALR1-5	lnc-GALR1-5:1	j	NONHSAG074938.1	NONHSAT178062.1	j	AC018529.2	ENST00000612024.1	j	yes
MK280040	LHRI_LNC1812.4	LHRI_LNC1812	11	21912432	22123669	+	11:21912432-22123669:+	NA,AC107882.1	NA	M0,	NA	NA	5	2792	lnc-ANO5-2	lnc-ANO5-2:2	j	NONHSAG007845.2	NONHSAT018380.2	j	AC107882.1	ENST00000530837.1	y	yes
MN296789	LHRI_LNC1745.1	LHRI_LNC1745	1	16496039	16496294	-	1:16496039-16496294:-	CROCCP3	M1,M0,	M2,	NA	Promoter,	1	256	lnc-SPATA21-6	lnc-SPATA21-6:3	o	NONHSAG000474.2	NONHSAT001128.2	o	-	-	u
MN298155	LHRI_LNC1014.1	LHRI_LNC1014	4	184536612	184536876	-	4:184536612-184536876:-	LINC02427	M0,	NA	M1,M0,	Promoter,	1	265	lnc-IRF2-1	lnc-IRF2-1:8	c	NONHSAG039495.2	NONHSAT099550.2	c	LINC02427	ENST00000605270.5	i	Yes?
MN298227	LHRI_LNC1107.1	LHRI_LNC1107	5	151739834	151740157	-	5:151739834-151740157:-	NA	NA	M0,M1,M2,	NA	Open chromatin,Promoter Flanking Region,	1	324	-	-	u	-	-	u	-	-	u		Yes
MN297229	LHRI_LNC2047.1	LHRI_LNC2047	14	21456496	21456859	+	14:21456496-21456859:+	NA	M0,M1,	M2,M1,M0,	M0,	Promoter,	1	364	lnc-TOX4-4	lnc-TOX4-4:1	c	NONHSAG014425.2	NONHSAT169051.1	x	-	-	u
MN297154	LHRI_LNC1952.1	LHRI_LNC1952	12	50283673	50283922	+	12:50283673-50283922:+	NA	M0,M1,	NA	NA	Promoter,	1	250	lnc-LARP4-6	lnc-LARP4-6:1	c	NONHSAG011135.2	NONHSAT028190.2	c	-	-	u
MN298185	LHRI_LNC1046.1	LHRI_LNC1046	5	55984032	55984302	-	5:55984032-55984302:-	AC008892.1	NA	M1,M0,M2,	NA	Promoter Flanking Region,	1	271	lnc-ANKRD55-3	lnc-ANKRD55-3:1	i	-	-	u	AC008892.1	ENST00000645512.1	i	yes
MN297512	LHRI_LNC269.1	LHRI_LNC269	17	77312623	77312825	+	17:77312623-77312825:+	2019-09-09	NA	M0,M1,M2,	NA	Enhancer,	1	203	-	-	u	NONHSAG022915.1	NONHSAT056292.1	i	-	-	u
MK280236	LHRI_LNC233.5	LHRI_LNC233	17	47488636	47492459	-	17:47488636-47492459:-	MRPL45P2	M0,M1,	M0,M1,M2,	NA	Promoter,	4	694	lnc-CDC27-9	lnc-CDC27-9:3	j	NONHSAG022043.2	NONHSAT054307.2	j	-	-	u
MN297230	LHRI_LNC2048.1	LHRI_LNC2048	14	21501027	21501247	+	14:21501027-21501247:+	METTL3	NA	M0,M1,M2,	NA	Open chromatin,	1	221	lnc-SALL2-2	lnc-SALL2-2:1	i	NONHSAG014425.2	NONHSAT169051.1	x	-	-	u
MN297926	LHRI_LNC749.1	LHRI_LNC749	22	42871232	42871446	+	22:42871232-42871446:+	PACSIN2	NA	M2,M0,M1,	NA	Open chromatin,Enhancer,	1	215	lnc-ARFGAP3-1	lnc-ARFGAP3-1:1	i	NONHSAG034068.2	NONHSAT087085.2	i	-	-	u
MN296998	LHRI_LNC1767.1	LHRI_LNC1767	10	89342433	89342745	+	10:89342433-89342745:+	LIPA	NA	M2,M0,M1,	NA	Promoter Flanking Region,	1	313	lnc-CH25H-2	lnc-CH25H-2:2	x	NONHSAG006481.2	NONHSAT157306.1	x	-	-	u
MN297297	LHRI_LNC2121.1	LHRI_LNC2121	15	51629479	51629692	-	15:51629479-51629692:-	NA	NA	NA	M0,	Promoter Flanking Region,	1	214	-	-	u	NONHSAG016892.1	NONHSAT043858.1	i	-	-	u
MN298456	LHRI_LNC1351.1	LHRI_LNC1351	7	143374961	143375234	-	7:143374961-143375234:-	NA	NA	NA	M0,	Promoter Flanking Region,Enhancer,CTCF Binding Site,	1	274	-	-	u	-	-	u	-	-	u		Yes
MN297037	LHRI_LNC1812.11	LHRI_LNC1812	11	21912442	21934183	+	11:21912442-21934183:+	NA,AC107882.1	NA	M0,	NA	NA	3	2005	-	-	u	-	-	u	-	-	u		Yes
MN298002	LHRI_LNC825.1	LHRI_LNC825	3	53239165	53296237	+	3:53239165-53296237:+	TKT,DCP1A	NA	M0,M1,M2,	NA	Open chromatin,Promoter Flanking Region,	5	1021	lnc-CACNA1D-3	lnc-CACNA1D-3:2	j	NONHSAG035204.1	NONHSAT089989.1	x	-	-	u
MN297626	LHRI_LNC419.1	LHRI_LNC419	2	20611069	20611506	-	2:20611069-20611506:-	HS1BP3	NA	M2,M1,M0,	NA	Enhancer,Promoter Flanking Region,	1	438	lnc-LDAH-4	lnc-LDAH-4:1	p	NONHSAG027169.2	NONHSAT069462.2	p	-	-	u
MN297674	LHRI_LNC483.1	LHRI_LNC483	2	85413719	85414041	+	2:85413719-85414041:+	CAPG	M1,	M0,M1,M2,	M0,M1,	Open chromatin,Promoter,Promoter Flanking Region,	1	323	lnc-RETSAT-1	lnc-RETSAT-1:2	x	NONHSAG028368.1	NONHSAT071974.1	e	-	-	u
MN298701	LHRI_LNC1651.2	LHRI_LNC1651	X	76147251	76152602	-	X:76147251-76152602:-	NA	NA	NA	NA	Promoter Flanking Region,	3	610	lnc-MAGEE2-1	lnc-MAGEE2-1:2	k	NONHSAG054825.2	NONHSAT137673.2	k	-	-	u
MN297969	LHRI_LNC791.1	LHRI_LNC791	3	38538237	38538546	+	3:38538237-38538546:+	EXOG	NA	M1,M0,M2,	NA	Open chromatin,	1	310	-	-	u	NONHSAG034799.1	NONHSAT089077.1	i	-	-	u
MN298397	LHRI_LNC1280.2	LHRI_LNC1280	7	55764797	55773686	+	7:55764797-55773686:+	PSPHP1	NA	M0,M1,M2,	NA	NA	2	654	lnc-ZNF713-3	lnc-ZNF713-3:2	c	NONHSAG047634.2	NONHSAT120697.2	c	-	-	u
MN297182	LHRI_LNC1984.2	LHRI_LNC1984	12	98450568	98463620	-	12:98450568-98463620:-	SLC9A7P1	NA	M2,	NA	Promoter Flanking Region,	2	2212	-	-	u	-	-	u	-	-	u		Yes
MK280519	LHRI_LNC1246.5	LHRI_LNC1246	7	137256	155465	+	7:137256-155465:+	AC093627.4	NA	M2,M0,M1,	NA	Promoter Flanking Region,Open chromatin,	4	9191	lnc-FAM20C-3	lnc-FAM20C-3:12	j	NONHSAG046715.2	NONHSAT118603.2	j	AC093627.4	ENST00000648846.1	j	yes
MN297285	LHRI_LNC2108.3	LHRI_LNC2108	15	32494018	32507370	-	15:32494018-32507370:-	AC135983.3	NA	M2,	NA	Open chromatin,	6	1112	-	-	u	NONHSAG016439.1	NONHSAT041480.1	o	-	-	u
MN298246	LHRI_LNC1131.1	LHRI_LNC1131	6	2851174	2853333	-	6:2851174-2853333:-	MIR4645	NA	NA	M0,M1,	Promoter,	1	2160	lnc-SERPINB1-5	lnc-SERPINB1-5:2	e	NONHSAG042688.1	NONHSAT106787.1	e	SERPINB9P1	ENST00000545177.4	p	Pseudogene
MN298096	LHRI_LNC941.2	LHRI_LNC941	4	11429074	11438580	+	4:11429074-11438580:+	HS3ST1	M0,M1,	NA	M0,	Promoter Flanking Region,Promoter,	3	4758	lnc-DRD5-29	lnc-DRD5-29:10	j	NONHSAG087396.1	NONHSAT198298.1	o	-	-	u
MN297492	LHRI_LNC245.1	LHRI_LNC245	17	58658833	58659290	-	17:58658833-58659290:-	TEX14	NA	NA	NA	Promoter Flanking Region,	1	458	-	-	u	-	-	u	-	-	u		Yes
MN297338	LHRI_LNC68.1	LHRI_LNC68	16	1595787	1596060	+	16:1595787-1596060:+	IFT140	NA	M2,M0,	NA	NA	1	274	lnc-CRAMP1-1	lnc-CRAMP1-1:1	i	NONHSAG018266.2	NONHSAT051984.2	i	AL133297.2	ENST00000563162.1	i	yes
MN297481	LHRI_LNC225.2	LHRI_LNC225	17	45214404	45220425	-	17:45214404-45220425:-	AC008105.3	M0,M1,	M1,M0,M2,	M1,M0,	Promoter,	3	3385	lnc-SPATA32-2	lnc-SPATA32-2:12	j	NONHSAG021970.2	NONHSAT176264.1	j	AC008105.3	ENST00000586376.5	j	yes
MN297732	LHRI_LNC552.1	LHRI_LNC552	2	162365940	162366173	+	2:162365940-162366173:+	GCA	NA	M2,M1,M0,	NA	NA	1	234	-	-	u	NONHSAG029676.1	NONHSAT075183.1	i	-	-	u
MK280101	LHRI_LNC1932.3	LHRI_LNC1932	12	24955577	24963959	+	12:24955577-24963959:+	AC026310.2	NA	M1,	NA	NA	3	644	lnc-LRMP-2	lnc-LRMP-2:1	j	NONHSAG010698.2	NONHSAT027335.2	j	AC026310.2	ENST00000546353.1	j	yes
MN298194	LHRI_LNC1056.1	LHRI_LNC1056	5	77996704	77996969	-	5:77996704-77996969:-	NA	NA	M1,M0,M2,	NA	Open chromatin,	1	266	lnc-AP3B1-3	lnc-AP3B1-3:1	i	NONHSAG040807.1	NONHSAT102335.1	i	-	-	u
MK280662	LHRI_LNC2036.1	LHRI_LNC2036	13	99491873	99492083	+	13:99491873-99492083:+	LINC01232	NA	M0,	NA	NA	1	211	lnc-GPR183-47	lnc-GPR183-47:5	i	NONHSAG014057.2	NONHSAT034919.2	i	LINC01232	ENST00000630421.2	i	yes
MK280579	LHRI_LNC1389.1	LHRI_LNC1389	8	35524731	35525761	-	8:35524731-35525761:-	LSM12P1	NA	M2,M1,M0,	NA	Promoter,	2	921	lnc-DUSP26-14	lnc-DUSP26-14:1	o	-	-	u	-	-	u
MK279965	LHRI_LNC422.1	LHRI_LNC422	1	116486515	116499467	-	1:116486515-116499467:-	AL390066.1	NA	M0,M1,M2,	M0,M1,	Enhancer,	1	12953	LINC01762	LINC01762:28	e	NONHSAG002535.2	NONHSAT005448.2	e	AL390066.1	ENST00000456414.2	e	yes
MN296875	LHRI_LNC668.1	LHRI_LNC668	1	150977561	150977854	+	1:150977561-150977854:+	NA	M1,	NA	NA	Promoter,	1	294	-	-	u	NONHSAG002885.1	NONHSAT006346.1	i	-	-	u
MN297655	LHRI_LNC447.1	LHRI_LNC447	2	44476931	44477247	+	2:44476931-44477247:+	CAMKMT	NA	M2,	NA	CTCF Binding Site,TF binding site,	1	317	-	-	u	NONHSAG027625.2	NONHSAT181695.1	i	-	-	u
MN298627	LHRI_LNC1529.1	LHRI_LNC1529	9	89361364	89362222	+	9:89361364-89362222:+	SEMA4D	NA	M2,M1,M0,	NA	Open chromatin,	1	859	lnc-SHC3-6	lnc-SHC3-6:1	x	-	-	u	-	-	u
MN297184	LHRI_LNC1985.2	LHRI_LNC1985	12	104265330	104265891	+	12:104265330-104265891:+	RPL18AP3	NA	M2,M0,M1,	NA	Promoter,Enhancer,	2	341	lnc-NFYB-1	lnc-NFYB-1:2	i	NONHSAG012140.2	NONHSAT030414.2	i	AC089983.1	ENST00000549807.1	i	yes
MK280400	LHRI_LNC772.15	LHRI_LNC772	3	11202622	11225932	-	3:11202622-11225932:-	HRH1	M0,M1,	M1,M0,M2,	M0,M1,	Enhancer,Promoter,Open chromatin,	4	4705	lnc-VGLL4-9	lnc-VGLL4-9:3	j	NONHSAG085340.1	NONHSAT195410.1	j	AC083855.2	ENST00000648436.1	j	yes
MN298288	LHRI_LNC1156.1	LHRI_LNC1156	6	30686774	30687194	+	6:30686774-30687194:+	PPP1R18	M0,M1,	M0,M1,M2,	M1,M0,	Promoter,	1	421	lnc-PPP1R18-1	lnc-PPP1R18-1:1	x	-	-	u	-	-	u
MN298512	LHRI_LNC1418.1	LHRI_LNC1418	8	78804482	78807802	+	8:78804482-78807802:+	IL7	M0,M1,	NA	NA	Promoter,	2	1804	lnc-HEY1-2	lnc-HEY1-2:1	x	NONHSAG099559.1	NONHSAT217254.1	i	AC083837.2	ENST00000649603.1	j	yes
MN297378	LHRI_LNC131.1	LHRI_LNC131	16	69579885	69580149	+	16:69579885-69580149:+	NFAT5	NA	M0,M1,M2,	NA	NA	1	265	-	-	u	-	-	u	-	-	u		Yes
MN297165	LHRI_LNC1968.1	LHRI_LNC1968	12	67354528	67547949	+	12:67354528-67547949:+	LINC02420,LINC02408	NA	NA	NA	CTCF Binding Site,Enhancer,Promoter Flanking Region,	6	2262	lnc-CAND1-1	lnc-CAND1-1:1	j	NONHSAG011586.2	NONHSAT029250.2	j	LINC02408	ENST00000650195.1	j	yes
MN297898	LHRI_LNC706.1	LHRI_LNC706	21	44148930	44149740	-	21:44148930-44149740:-	GATD3A	NA	NA	NA	Enhancer,CTCF Binding Site,	1	811	-	-	u	-	-	u	-	-	u		Yes
MN298272	LHRI_LNC1142.1	LHRI_LNC1142	6	15656140	15656365	-	6:15656140-15656365:-	DTNBP1	NA	M0,M1,M2,	NA	NA	1	226	-	-	u	-	-	u	-	-	u		Yes
MN297382	LHRI_LNC137.1	LHRI_LNC137	16	72210180	72210379	+	16:72210180-72210379:+	NA	NA	M2,M1,	M1,	NA	1	200	-	-	u	-	-	u	-	-	u		Yes
MN297390	LHRI_LNC145.2	LHRI_LNC145	16	73124981	73137571	+	16:73124981-73137571:+	AC116667.2	NA	NA	NA	Enhancer,Promoter Flanking Region,	4	544	lnc-DHX38-41	lnc-DHX38-41:1	j	NONHSAG019951.1	NONHSAT143629.1	y	AC116667.2	ENST00000641075.1	j	yes
MK280520	LHRI_LNC1246.7	LHRI_LNC1246	7	137256	153823	+	7:137256-153823:+	AC093627.4	NA	M2,M1,M0,	NA	Promoter Flanking Region,Open chromatin,	4	4405	lnc-FAM20C-3	lnc-FAM20C-3:12	j	NONHSAG046715.2	NONHSAT118603.2	j	AC093627.4	ENST00000648846.1	j	yes
MK280198	LHRI_LNC114.1	LHRI_LNC114	16	31334865	31338426	-	16:31334865-31338426:-	NA	NA	M2,M0,M1,	NA	CTCF Binding Site,	1	3562	-	-	u	NONHSAG019146.1	NONHSAT141893.1	p	-	-	u
MN297353	LHRI_LNC90.1	LHRI_LNC90	16	16354847	16355863	-	16:16354847-16355863:-	NA	NA	M0,M1,M2,	NA	TF binding site,	1	1017	-	-	u	NONHSAG018718.1	NONHSAT140780.1	o	-	-	u
MN297654	LHRI_LNC444.1	LHRI_LNC444	2	43106208	43106454	+	2:43106208-43106454:+	NA	NA	NA	M0,M1,	Promoter Flanking Region,	1	247	LINC02580	LINC02580:10	x	NONHSAG027603.2	NONHSAT184545.1	x	-	-	u
MK280227	LHRI_LNC214.1	LHRI_LNC214	17	43014646	43014894	+	17:43014646-43014894:+	VAT1	NA	M0,M1,M2,	NA	Open chromatin,	1	249	lnc-VAT1-1	lnc-VAT1-1:1	i	NONHSAG073684.1	NONHSAT176227.1	i	-	-	u
MN298329	LHRI_LNC1212.1	LHRI_LNC1212	6	134378762	134379072	-	6:134378762-134379072:-	NA	NA	NA	M1,	Promoter Flanking Region,Enhancer,	1	311	-	-	u	-	-	u	-	-	u		Yes
MN297265	LHRI_LNC2082.1	LHRI_LNC2082	14	77334580	77334797	+	14:77334580-77334797:+	NA	NA	M2,M0,M1,	NA	NA	1	218	-	-	u	-	-	u	-	-	u		Yes
MN298120	LHRI_LNC969.1	LHRI_LNC969	4	78917045	78918108	+	4:78917045-78918108:+	PAQR3	NA	M1,M0,M2,	NA	NA	1	1064	lnc-NAA11-1	lnc-NAA11-1:4	x	NONHSAG038290.2	NONHSAT097093.2	p	-	-	u
MN297495	LHRI_LNC248.1	LHRI_LNC248	17	59837265	59837492	-	17:59837265-59837492:-	VMP1	M0,M1,	M1,M0,M2,	M1,M0,	Promoter,	1	228	-	-	u	-	-	u	-	-	u		Yes
MN296981	LHRI_LNC1736.1	LHRI_LNC1736	10	62637330	62637712	-	10:62637330-62637712:-	ZNF365	NA	NA	M0,	CTCF Binding Site,Promoter Flanking Region,	1	383	-	-	u	-	-	u	AC024598.1	ENST00000647733.1	i	yes
MN298330	LHRI_LNC1213.1	LHRI_LNC1213	6	134379246	134379952	+	6:134379246-134379952:+	NA	NA	NA	M1,	Enhancer,Promoter Flanking Region,	1	707	-	-	u	-	-	u	-	-	u		Yes
MN298688	LHRI_LNC1628.2	LHRI_LNC1628	X	39376344	39434821	-	X:39376344-39434821:-	LINC01282	NA	NA	NA	CTCF Binding Site,	4	711	LINC01282	LINC01282:1	j	NONHSAG054259.2	NONHSAT136669.2	j	LINC01282	ENST00000431646.1	j	yes
MN297368	LHRI_LNC111.1	LHRI_LNC111	16	31070167	31124064	+	16:31070167-31124064:+	AC135050.6	M0,M1,	M2,M0,M1,	NA	Promoter,	2	607	lnc-BCKDK-4	lnc-BCKDK-4:2	k	NONHSAG071611.1	NONHSAT172876.1	k	AC135050.6	ENST00000613584.1	k	yes
MN298623	LHRI_LNC1526.2	LHRI_LNC1526	9	83219335	83270819	+	9:83219335-83270819:+	AL137847.1	M0,M1,	NA	NA	Open chromatin,Promoter,	2	868	lnc-IDNK-3	lnc-IDNK-3:2	c	NONHSAG052678.2	NONHSAT132733.2	j	AL137847.1	ENST00000416473.1	j	Yes?
MN297335	LHRI_LNC65.1	LHRI_LNC65	16	687678	687950	+	16:687678-687950:+	WDR24	M1,M0,	M1,M0,M2,	NA	Promoter,	1	273	-	-	u	NONHSAG018191.1	NONHSAT051799.1	i	-	-	u
MN297625	LHRI_LNC418.1	LHRI_LNC418	2	19347654	19348011	-	2:19347654-19348011:-	NA	M1,	M1,M0,M2,	M0,	Promoter,CTCF Binding Site,	1	358	LINC01376	LINC01376:8	c	NONHSAG027124.2	NONHSAT069391.2	c	LINC01376	ENST00000650025.1	e	yes
MN297193	LHRI_LNC1995.4	LHRI_LNC1995	12	111285258	111315113	-	12:111285258-111315113:-	CUX2	NA	M0,	M0,	CTCF Binding Site,Promoter Flanking Region,	3	2328	lnc-FAM109A-3	lnc-FAM109A-3:1	j	-	-	u	-	-	u
MN298447	LHRI_LNC1340.1	LHRI_LNC1340	7	131091113	131091672	-	7:131091113-131091672:-	AC016831.7	NA	M1,M0,M2,	NA	NA	1	560	LINC-PINT	LINC-PINT:18	c	NONHSAG048820.2	NONHSAT123398.2	c	AC016831.6	ENST00000644432.1	i	yes
MN297407	LHRI_LNC165.1	LHRI_LNC165	17	4210408	4214030	-	17:4210408-4214030:-	ANKFY1	NA	M0,M1,M2,	NA	Promoter Flanking Region,	2	249	lnc-HASPIN-2	lnc-HASPIN-2:1	i	NONHSAG072896.1	NONHSAT174777.1	i	-	-	u
MN296802	LHRI_LNC1936.1	LHRI_LNC1936	1	28591726	28592026	-	1:28591726-28592026:-	TAF12	M0,M1,	M1,M0,M2,	M1,M0,	Promoter,Enhancer,Promoter Flanking Region,	1	301	-	-	u	-	-	u	-	-	u		Yes
MN297954	LHRI_LNC774.1	LHRI_LNC774	3	11273736	11274023	-	3:11273736-11274023:-	ATG7	M1,M0,	M2,M1,M0,	M0,M1,	Promoter,	1	288	lnc-VGLL4-8	lnc-VGLL4-8:1	c	-	-	u	-	-	u
MN298405	LHRI_LNC1288.17	LHRI_LNC1288	7	66654538	66669562	+	7:66654538-66669562:+	AC006001.2	M0,M1,	M2,M0,M1,	M1,M2,M0,	Promoter,	6	992	lnc-KCTD7-2	lnc-KCTD7-2:12	j	NONHSAG047850.2	NONHSAT121214.2	j	AC006001.2	ENST00000439360.5	j	yes
MN298045	LHRI_LNC875.1	LHRI_LNC875	3	150429208	150429503	+	3:150429208-150429503:+	TSC22D2	NA	M1,M0,M2,	NA	NA	1	296	lnc-TSC22D2-3	lnc-TSC22D2-3:1	i	NONHSAG036390.1	NONHSAT092701.1	i	-	-	u
MN298276	LHRI_LNC1152.1	LHRI_LNC1152	6	26470512	26470757	+	6:26470512-26470757:+	BTN2A1	NA	M2,M1,M0,	NA	Open chromatin,Promoter Flanking Region,	1	246	-	-	u	-	-	u	-	-	u		Yes
MN298126	LHRI_LNC980.2	LHRI_LNC980	4	119454820	119552017	+	4:119454820-119552017:+	AC093752.1	M1,	M2,M1,M0,	NA	Promoter Flanking Region,Promoter,	14	1772	lnc-USP53-8	lnc-USP53-8:6	j	NONHSAG038756.2	NONHSAT098070.2	j	AC093752.2	ENST00000506942.1	y	yes
MN297548	LHRI_LNC308.1	LHRI_LNC308	19	2162684	2162963	-	19:2162684-2162963:-	AP3D1	M1,M0,	M0,	M0,M1,	Promoter,	1	280	-	-	u	-	-	u	-	-	u		Yes
MN298452	LHRI_LNC1344.4	LHRI_LNC1344	7	135980969	136058471	+	7:135980969-136058471:+	AC024084.1,AC078845.1	NA	NA	NA	Promoter Flanking Region,	4	348	lnc-STMP1-5	lnc-STMP1-5:3	j	NONHSAG048890.2	NONHSAT123539.2	j	AC024084.1	ENST00000440744.2	j	yes
MN297484	LHRI_LNC228.1	LHRI_LNC228	17	46260619	46261181	+	17:46260619-46261181:+	NA	NA	M0,M1,M2,	NA	Promoter,	1	563	-	-	u	-	-	u	-	-	u		Yes
MN296871	LHRI_LNC600.1	LHRI_LNC600	1	149708460	149708702	-	1:149708460-149708702:-	AC243772.3	NA	NA	NA	Promoter Flanking Region,	1	243	lnc-HIST2H2BF-3	lnc-HIST2H2BF-3:3	i	-	-	u	-	-	u
MK280584	LHRI_LNC1400.1	LHRI_LNC1400	8	59969988	59970269	+	8:59969988-59970269:+	NA	NA	NA	NA	TF binding site,	1	282	-	-	u	NONHSAG098854.1	NONHSAT215863.1	e	-	-	u
MN298652	LHRI_LNC1561.1	LHRI_LNC1561	9	124376884	124377137	+	9:124376884-124377137:+	PSMB7	NA	M2,M1,M0,	NA	Open chromatin,	1	254	-	-	u	-	-	u	-	-	u		Yes
MN297273	LHRI_LNC2095.1	LHRI_LNC2095	14	105442990	105443262	+	14:105442990-105443262:+	MTA1	NA	M1,M0,M2,	NA	Open chromatin,	1	273	-	-	u	-	-	u	-	-	u		Yes
MN297753	LHRI_LNC580.1	LHRI_LNC580	2	197477472	197477733	+	2:197477472-197477733:+	NA	NA	M0,M1,M2,	NA	Open chromatin,	1	262	-	-	u	-	-	u	-	-	u		Yes
MN298543	LHRI_LNC1454.1	LHRI_LNC1454	8	143027083	143027412	+	8:143027083-143027412:+	NA	NA	M2,	NA	CTCF Binding Site,Open chromatin,Enhancer,Promoter Flanking Region,	1	330	-	-	u	-	-	u	-	-	u		Yes
MK280668	LHRI_LNC1666.1	LHRI_LNC1666	X	103609052	103609397	-	X:103609052-103609397:-	TCEAL3	NA	M2,M0,	NA	Promoter,	1	346	lnc-TCEAL3-1	lnc-TCEAL3-1:3	i	-	-	u	-	-	u
MN298013	LHRI_LNC835.1	LHRI_LNC835	3	87890121	88033205	-	3:87890121-88033205:-	HTR1F	NA	NA	NA	Promoter Flanking Region,	4	1103	-	-	u	NONHSAG084799.1	NONHSAT194177.1	x	-	-	u
MN298193	LHRI_LNC1055.1	LHRI_LNC1055	5	77865174	77865990	+	5:77865174-77865990:+	TBCA	NA	NA	NA	Promoter Flanking Region,Open chromatin,CTCF Binding Site,	2	370	lnc-PDE8B-1	lnc-PDE8B-1:1	o	NONHSAG040794.2	NONHSAT102299.2	o	-	-	u
MK280222	LHRI_LNC197.6	LHRI_LNC197	17	30600400	31021164	+	17:30600400-31021164:+	SMURF2P1	M1,M0,	NA	M0,	Promoter,	2	729	lnc-RNF135-1	lnc-RNF135-1:34	j	NONHSAG021404.2	NONHSAT052795.2	j	AC130324.1	ENST00000584157.1	x	yes
MN298259	LHRI_LNC1138.15	LHRI_LNC1138	6	6697624	6801180	-	6:6697624-6801180:-	AL031123.1,BTF3P7	NA	M2,	M1,M0,	Promoter Flanking Region,Enhancer,	5	4168	lnc-F13A1-3	lnc-F13A1-3:22	j	NONHSAG042935.2	NONHSAT107561.2	j	AL031123.1	ENST00000648205.1	j	yes
MK280167	LHRI_LNC49.1	LHRI_LNC49	15	77043280	77048435	+	15:77043280-77048435:+	AC090181.1	NA	M0,M1,M2,	NA	NA	1	5156	lnc-PSTPIP1-1	lnc-PSTPIP1-1:1	e	NONHSAG017515.2	NONHSAT047420.2	e	AC090181.1	ENST00000560446.1	e	yes
MN297887	LHRI_LNC693.1	LHRI_LNC693	21	32787970	32788171	+	21:32787970-32788171:+	C21orf62-AS1	NA	M2,	NA	Open chromatin,	1	202	C21orf62-AS1	C21orf62-AS1:3	i	NONHSAG032683.2	NONHSAT190869.1	i	C21orf62-AS1	ENST00000382375.8	i	yes
MN297551	LHRI_LNC312.1	LHRI_LNC312	19	3389777	3390146	+	19:3389777-3390146:+	NFIC	NA	M1,M0,M2,	NA	Enhancer,	1	370	-	-	u	NONHSAG024474.2	NONHSAT179359.1	i	-	-	u
MN297043	LHRI_LNC1820.1	LHRI_LNC1820	11	58493817	58495071	-	11:58493817-58495071:-	NA	NA	M1,M0,M2,	NA	CTCF Binding Site,Open chromatin,	1	1255	-	-	u	NONHSAG008379.1	NONHSAT021481.1	i	-	-	u
MK280481	LHRI_LNC1126.1	LHRI_LNC1126	5	180829954	180831605	-	5:180829954-180831605:-	HEIH	M1,M0,	M1,M0,M2,	M0,M2,M1,	Promoter,Promoter Flanking Region,CTCF Binding Site,	2	1552	lnc-MGAT1-4	lnc-MGAT1-4:3	j	NONHSAG042475.2	NONHSAT105822.2	j	HEIH	ENST00000623091.1	o	yes
MN296846	LHRI_LNC406.1	LHRI_LNC406	1	112699646	112699852	-	1:112699646-112699852:-	MOV10	NA	M0,M1,M2,	NA	Promoter Flanking Region,TF binding site,	1	207	-	-	u	-	-	u	-	-	u		Yes
MN296984	LHRI_LNC1739.1	LHRI_LNC1739	10	71875179	71875468	-	10:71875179-71875468:-	NA	NA	M2,	NA	CTCF Binding Site,Enhancer,	1	290	lnc-PSAP-1	lnc-PSAP-1:2	p	-	-	u	-	-	u
MN297268	LHRI_LNC2086.1	LHRI_LNC2086	14	92395697	92402701	-	14:92395697-92402701:-	SLC24A4	NA	M2,	NA	CTCF Binding Site,Promoter Flanking Region,Enhancer,Open chromatin,	3	905	-	-	u	-	-	u	-	-	u		Yes
MN298734	LHRI_LNC1692.1	LHRI_LNC1692	Y	13917575	13918065	+	Y:13917575-13918065:+	ANOS2P	NA	NA	NA	NA	1	491	-	-	u	-	-	u	-	-	u		Yes
MN297274	LHRI_LNC2093.1	LHRI_LNC2093	15	21293245	21293626	-	15:21293245-21293626:-	AC068446.1	NA	M1,M2,	NA	CTCF Binding Site,	1	382	lnc-POTEB3-1	lnc-POTEB3-1:3	c	NONHSAG016232.2	NONHSAT040693.2	i	-	-	u
MN298357	LHRI_LNC1232.1	LHRI_LNC1232	6	159245758	159246050	+	6:159245758-159246050:+	FNDC1	NA	NA	NA	CTCF Binding Site,	1	293	-	-	u	-	-	u	-	-	u		Yes
MN298536	LHRI_LNC1448.1	LHRI_LNC1448	8	131701870	131702091	-	8:131701870-131702091:-	NA	NA	NA	NA	NA	1	222	-	-	u	-	-	u	-	-	u		Yes
MN296983	LHRI_LNC1738.3	LHRI_LNC1738	10	69925011	69956977	-	10:69925011-69956977:-	COL13A1	NA	NA	NA	CTCF Binding Site,Promoter Flanking Region,	3	2829	-	-	u	NONHSAG006126.2	NONHSAT155620.1	x	-	-	u
MN297505	LHRI_LNC262.1	LHRI_LNC262	17	75295789	75296855	+	17:75295789-75296855:+	NA	NA	M2,M1,	M0,M1,	Promoter Flanking Region,	1	1067	-	-	u	NONHSAG022853.1	NONHSAT056140.1	i	-	-	u
MN298229	LHRI_LNC1110.1	LHRI_LNC1110	5	154823921	154824288	+	5:154823921-154824288:+	FAXDC2	NA	M1,M0,M2,	NA	NA	1	368	lnc-GEMIN5-1	lnc-GEMIN5-1:1	i	NONHSAG042014.2	NONHSAT104713.2	i	-	-	u
MN297962	LHRI_LNC784.1	LHRI_LNC784	3	22368972	22369383	-	3:22368972-22369383:-	ZNF385D	NA	NA	NA	Open chromatin,	1	412	lnc-ZNF385D-3	lnc-ZNF385D-3:3	i	NONHSAG034593.1	NONHSAT088647.1	i	-	-	u
MK280428	LHRI_LNC880.1	LHRI_LNC880	3	156711956	156712399	-	3:156711956-156712399:-	METTL15P1	NA	M2,M0,M1,	NA	Open chromatin,	1	444	-	-	u	-	-	u	-	-	u		Yes
MN297181	LHRI_LNC1983.1	LHRI_LNC1983	12	96957803	96958024	+	12:96957803-96958024:+	NA	NA	M1,M0,M2,	NA	NA	1	222	-	-	u	-	-	u	-	-	u		Yes
MK279963	LHRI_LNC362.1	LHRI_LNC362	1	111615704	111619741	-	1:111615704-111619741:-	RAP1A	M1,M0,	M2,M0,M1,	M0,M1,	Promoter,	1	4038	-	-	u	-	-	u	-	-	u		Yes
MK279927	LHRI_LNC1593.1	LHRI_LNC1593	KI270728.1	369543	369751	+	KI270728.1:369543-369751:+	NA	NA	NA	NA	NA	1	209	-	-	u	-	-	u	-	-	u		Yes
MN297134	LHRI_LNC1922.1	LHRI_LNC1922	12	11148080	11148349	-	12:11148080-11148349:-	AC018630.2	NA	M2,M1,M0,	NA	NA	1	270	lnc-PRR4-1	lnc-PRR4-1:1	i	NONHSAG010496.1	NONHSAT026912.1	i	-	-	u
MN298353	LHRI_LNC1229.1	LHRI_LNC1229	6	157375665	157376624	-	6:157375665-157376624:-	NA	NA	NA	NA	Open chromatin,	1	960	-	-	u	NONHSAG045234.1	NONHSAT115701.1	i	-	-	u
MK280037	LHRI_LNC886.1	LHRI_LNC886	3	158833460	158845029	+	3:158833460-158845029:+	GPR79	NA	M2,M0,M1,	NA	NA	1	11570	lnc-MFSD1-2	lnc-MFSD1-2:1	k	NONHSAG036515.2	NONHSAT092952.2	k	-	-	u
MN297167	LHRI_LNC1968.4	LHRI_LNC1968	12	67450689	67568691	+	12:67450689-67568691:+	LINC02420,LINC02408	NA	NA	NA	TF binding site,	4	3414	LINC02408	LINC02408:7	j	NONHSAG011590.2	NONHSAT029258.2	j	LINC02408	ENST00000650195.1	j	yes
MN298061	LHRI_LNC899.1	LHRI_LNC899	3	181146551	181146844	+	3:181146551-181146844:+	SOX2-OT	NA	NA	NA	NA	1	294	SOX2-OT	SOX2-OT:76	i	NONHSAG036785.1	NONHSAT093477.1	x	SOX2-OT	ENST00000645423.1	i	Yes?
MN296861	LHRI_LNC518.1	LHRI_LNC518	1	145425254	145425581	-	1:145425254-145425581:-	NA	M1,	M2,M1,	NA	Promoter Flanking Region,	1	328	-	-	u	-	-	u	-	-	u		Yes
MN297634	LHRI_LNC430.1	LHRI_LNC430	2	29211643	29212250	+	2:29211643-29212250:+	ALK	NA	M1,M0,M2,	NA	CTCF Binding Site,Open chromatin,	1	608	-	-	u	-	-	u	-	-	u		Yes
MN297751	LHRI_LNC578.1	LHRI_LNC578	2	197113836	197114096	-	2:197113836-197114096:-	ANKRD44	NA	M2,M1,M0,	NA	Open chromatin,CTCF Binding Site,	1	261	-	-	u	-	-	u	-	-	u		Yes
MN297528	LHRI_LNC283.7	LHRI_LNC283	18	5238128	5246504	+	18:5238128-5246504:+	LINC00667	M0,M1,	M1,	M0,	Promoter,	3	5075	LINC00667	LINC00667:3	j	NONHSAG023258.2	NONHSAT057058.2	j	LINC00667	ENST00000577439.2	j	yes
MN296885	LHRI_LNC823.1	LHRI_LNC823	1	156193534	156193757	-	1:156193534-156193757:-	NA	M0,M1,	M0,M1,M2,	M1,M0,	CTCF Binding Site,Promoter,	1	224	lnc-PAQR6-6	lnc-PAQR6-6:1	c	NONHSAG003110.1	NONHSAT006823.1	x	-	-	u
MN296948	LHRI_LNC1645.1	LHRI_LNC1645	1	248874257	248874493	+	1:248874257-248874493:+	NA	M0,M1,	M2,	NA	Promoter Flanking Region,	1	237	-	-	u	NONHSAG057395.1	NONHSAT150909.1	c	-	-	u
MN297306	LHRI_LNC2131.5	LHRI_LNC2131	15	67514955	67521632	-	15:67514955-67521632:-	IQCH-AS1	M0,M1,	M2,	M1,M0,	Promoter,	3	354	IQCH-AS1	IQCH-AS1:16	j	NONHSAG017245.2	NONHSAT046853.2	j	IQCH-AS1	ENST00000561232.5	j	yes
MN298645	LHRI_LNC1552.8	LHRI_LNC1552	9	111780147	111787947	+	9:111780147-111787947:+	C9orf84	NA	M0,M2,	NA	NA	2	1393	lnc-PTGR1-3	lnc-PTGR1-3:1	x	NONHSAG053165.1	NONHSAT133928.1	x	-	-	u
MK280069	LHRI_LNC1860.1	LHRI_LNC1860	11	72165530	72178705	-	11:72165530-72178705:-	AP000812.2	NA	M1,M0,M2,	NA	Enhancer,	2	1539	lnc-FOLR1-1	lnc-FOLR1-1:1	x	NONHSAG008974.2	NONHSAT022761.2	x	AP000812.1	ENST00000378140.3	i	yes
MN298489	LHRI_LNC1386.1	LHRI_LNC1386	8	26460212	26460588	+	8:26460212-26460588:+	BNIP3L	NA	NA	NA	Enhancer,	1	377	-	-	u	-	-	u	-	-	u		Yes
MN297113	LHRI_LNC1897.1	LHRI_LNC1897	11	130871950	130872406	-	11:130871950-130872406:-	NA	NA	M2,M1,M0,	NA	Enhancer,	1	457	LINC02551	LINC02551:9	i	NONHSAG010061.2	NONHSAT025148.2	i	-	-	u
MN298116	LHRI_LNC962.1	LHRI_LNC962	4	74162863	74163124	+	4:74162863-74163124:+	MTHFD2L	NA	M2,M1,M0,	NA	Open chromatin,	1	262	-	-	u	NONHSAG038166.1	NONHSAT096837.1	i	-	-	u
MN296914	LHRI_LNC1259.1	LHRI_LNC1259	1	204572845	204573077	+	1:204572845-204573077:+	NA	NA	M2,M1,M0,	NA	Open chromatin,	1	233	-	-	u	NONHSAG004034.1	NONHSAT008958.1	i	-	-	u
MN297990	LHRI_LNC810.1	LHRI_LNC810	3	48213109	48213501	+	3:48213109-48213501:+	NA	NA	M1,M2,	NA	CTCF Binding Site,Enhancer,	1	393	lnc-CDC25A-1	lnc-CDC25A-1:1	i	NONHSAG035010.2	NONHSAT089545.2	i	-	-	u
MN297643	LHRI_LNC435.1	LHRI_LNC435	2	33477268	33477658	-	2:33477268-33477658:-	RASGRP3	M1,M0,	M2,	M0,	Promoter,	1	391	lnc-LTBP1-1	lnc-LTBP1-1:1	i	-	-	u	-	-	u
MN297314	LHRI_LNC47.1	LHRI_LNC47	15	74540406	74540721	-	15:74540406-74540721:-	NA	M0,M1,	NA	NA	Promoter Flanking Region,Promoter,	1	316	-	-	u	-	-	u	-	-	u		Yes
MN297097	LHRI_LNC1875.1	LHRI_LNC1875	11	104685843	104694615	-	11:104685843-104694615:-	NA	NA	NA	NA	Enhancer,	3	362	lnc-CASP4-4	lnc-CASP4-4:1	j	-	-	u	-	-	u
MN298035	LHRI_LNC861.1	LHRI_LNC861	3	133572773	133573269	-	3:133572773-133573269:-	NA	M1,M0,	M2,M0,M1,	M1,M0,	Promoter,	1	497	-	-	u	-	-	u	-	-	u		Yes
MN298086	LHRI_LNC930.4	LHRI_LNC930	4	2935012	2938298	+	4:2935012-2938298:+	NOP14-AS1	M0,M1,	M2,M0,M1,	NA	Promoter,	2	3139	NOP14-AS1	NOP14-AS1:18	j	NONHSAG037320.2	NONHSAT094826.2	j	NOP14-AS1	ENST00000505731.5	j	yes
MK280311	LHRI_LNC529.1	LHRI_LNC529	2	127387517	127400580	+	2:127387517-127400580:+	AC068282.1	M0,M1,	M2,	M0,M2,M1,	Promoter,	4	3622	lnc-PROC-1	lnc-PROC-1:13	j	NONHSAG029187.2	NONHSAT074149.2	j	AC068282.1	ENST00000433673.1	k	yes
MK280223	LHRI_LNC198.7	LHRI_LNC198	17	30731625	30790908	+	17:30731625-30790908:+	SUZ12P1	M0,M1,	M1,M0,M2,	NA	Promoter,Promoter Flanking Region,	11	2195	lnc-ATAD5-9	lnc-ATAD5-9:8	j	NONHSAG021408.2	NONHSAT052812.2	j	AC127024.4	ENST00000585212.1	x	yes
MN298557	LHRI_LNC1473.1	LHRI_LNC1473	9	5576726	5609087	-	9:5576726-5609087:-	AL162253.1,RIC1	NA	NA	NA	Promoter Flanking Region,Open chromatin,	4	1129	lnc-ERMP1-5	lnc-ERMP1-5:1	j	NONHSAG051718.2	NONHSAT130105.2	j	AL162253.1	ENST00000443792.1	x	yes
MN296999	LHRI_LNC1768.1	LHRI_LNC1768	10	89720233	89720468	+	10:89720233-89720468:+	KIF20B	NA	M0,M1,M2,	NA	NA	1	236	-	-	u	NONHSAG006490.2	NONHSAT015531.2	i	-	-	u
MN297258	LHRI_LNC2071.1	LHRI_LNC2071	14	64444921	64445236	-	14:64444921-64445236:-	MTHFD1	NA	M2,M0,M1,	NA	Enhancer,	1	316	lnc-ZBTB25-2	lnc-ZBTB25-2:1	i	NONHSAG015215.2	NONHSAT037335.2	i	AL122035.1	ENST00000556640.1	i	yes
MN297170	LHRI_LNC1973.1	LHRI_LNC1973	12	68972111	68973154	+	12:68972111-68973154:+	NA	NA	M0,M1,M2,	NA	Promoter Flanking Region,	1	1044	-	-	u	-	-	u	-	-	u		Yes
MN298390	LHRI_LNC1271.8	LHRI_LNC1271	7	38341615	38373578	+	7:38341615-38373578:+	TRG-AS1	NA	M1,M0,	NA	CTCF Binding Site,Promoter Flanking Region,	4	611	TRG-AS1	TRG-AS1:7	j	NONHSAG047376.2	NONHSAT120179.2	j	TRG-AS1	ENST00000629357.1	j	yes
MN297138	LHRI_LNC1924.1	LHRI_LNC1924	12	12726976	12727228	+	12:12726976-12727228:+	APOLD1	M0,M1,	M1,	M0,M1,	Promoter Flanking Region,Promoter,	1	253	-	-	u	-	-	u	-	-	u		Yes
MN297785	LHRI_LNC621.1	LHRI_LNC621	20	3175291	3175501	-	20:3175291-3175501:-	NA	M1,	M2,	NA	Promoter,	1	211	lnc-ITPA-2	lnc-ITPA-2:1	x	NONHSAG031147.1	NONHSAT078223.1	e	-	-	u
MN297158	LHRI_LNC1959.1	LHRI_LNC1959	12	56300047	56314795	+	12:56300047-56314795:+	AC073896.2	M1,M0,	M2,M0,M1,	M0,	Promoter,CTCF Binding Site,	2	408	lnc-IL23A-6	lnc-IL23A-6:2	j	NONHSAG011374.2	NONHSAT162261.1	j	AC073896.2	ENST00000549565.1	j	Yes?
MN297399	LHRI_LNC155.1	LHRI_LNC155	16	85135037	85137635	-	16:85135037-85137635:-	LINC02139	NA	NA	M1,M0,	Promoter Flanking Region,TF binding site,	1	2599	lnc-FAM92B-9	lnc-FAM92B-9:2	k	NONHSAG020182.2	NONHSAT173387.1	x	LINC02139	ENST00000612023.1	x	yes
MN298070	LHRI_LNC911.1	LHRI_LNC911	3	196968158	196968385	-	3:196968158-196968385:-	PIGZ	M0,M1,	M0,M1,M2,	NA	Promoter,CTCF Binding Site,	1	228	lnc-PIGZ-1	lnc-PIGZ-1:1	i	-	-	u	-	-	u
MN298099	LHRI_LNC944.1	LHRI_LNC944	4	16234969	16235410	+	4:16234969-16235410:+	TAPT1-AS1	NA	NA	NA	Promoter Flanking Region,	1	442	TAPT1-AS1	TAPT1-AS1:13	c	NONHSAG037561.2	NONHSAT095675.2	i	TAPT1-AS1	ENST00000573950.5	i	yes
MN297879	LHRI_LNC685.1	LHRI_LNC685	21	25560471	25575539	+	21:25560471-25575539:+	MIR155	M1,	NA	M1,	Open chromatin,Promoter,Promoter Flanking Region,	5	2283	MIR155HG	MIR155HG:5	j	NONHSAG032560.2	NONHSAT081498.2	j	MIR155HG	ENST00000456917.1	j	yes
MN297445	LHRI_LNC208.1	LHRI_LNC208	17	38681443	38681774	-	17:38681443-38681774:-	NA	NA	NA	NA	NA	1	332	-	-	u	NONHSAG021663.2	NONHSAT176160.1	c	-	-	u
MN298736	LHRI_LNC1695.1	LHRI_LNC1695	Y	19695534	19695746	-	Y:19695534-19695746:-	NA	NA	NA	NA	NA	1	213	-	-	u	-	-	u	-	-	u		Yes
MN297961	LHRI_LNC783.1	LHRI_LNC783	3	22162876	22163701	-	3:22162876-22163701:-	ZNF385D	NA	M2,	NA	NA	1	826	lnc-ZNF385D-3	lnc-ZNF385D-3:3	i	NONHSAG034593.1	NONHSAT088647.1	i	-	-	u
MN296844	LHRI_LNC344.1	LHRI_LNC344	1	110657829	110658368	-	1:110657829-110658368:-	NA	NA	M2,M0,M1,	NA	NA	1	540	lnc-KCNA3-3	lnc-KCNA3-3:4	c	NONHSAG002387.2	NONHSAT152081.1	c	-	-	u
MN297316	LHRI_LNC53.1	LHRI_LNC53	15	83087836	83088943	-	15:83087836-83088943:-	AC022558.2	NA	M2,	NA	NA	1	1108	lnc-FAM103A1-1	lnc-FAM103A1-1:1	i	NONHSAG017679.2	NONHSAT047875.2	i	AC022558.2	ENST00000566841.1	i	yes
MN298424	LHRI_LNC1308.1	LHRI_LNC1308	7	100210519	100210718	-	7:100210519-100210718:-	STAG3	NA	M1,M0,M2,	NA	Promoter Flanking Region,	1	200	lnc-GPC2-2	lnc-GPC2-2:5	c	NONHSAG048350.2	NONHSAT122347.2	c	-	-	u
MN297101	LHRI_LNC1882.2	LHRI_LNC1882	11	110371785	110377916	-	11:110371785-110377916:-	AP000924.1	NA	NA	M0,M1,	Promoter Flanking Region,	3	578	lnc-FDX1-1	lnc-FDX1-1:1	i	NONHSAG009576.2	NONHSAT024072.2	i	AP000924.1	ENST00000526605.5	i	Yes?
MN298108	LHRI_LNC951.33	LHRI_LNC951	4	40590422	40596830	-	4:40590422-40596830:-	RBM47	NA	M1,M0,M2,	NA	Open chromatin,	3	1875	lnc-APBB2-3	lnc-APBB2-3:1	i	NONHSAG037813.2	NONHSAT199898.1	i	-	-	u
MN297739	LHRI_LNC563.12	LHRI_LNC563	2	178523292	178598878	+	2:178523292-178598878:+	TTN-AS1	M1,M0,	M1,M2,	NA	CTCF Binding Site,Promoter,	6	3313	-	-	u	NONHSAG029956.2	NONHSAT075758.2	j	TTN-AS1	ENST00000419746.5	j	yes
MN298444	LHRI_LNC1335.18	LHRI_LNC1335	7	130944168	131107928	-	7:130944168-131107928:-	AC016831.7	M1,M0,	M0,	M0,	Promoter,	5	1235	LINC-PINT	LINC-PINT:30	c	NONHSAG048820.2	NONHSAT213990.1	c	AC016831.6	ENST00000644432.1	j	yes
MK280484	LHRI_LNC1138.9	LHRI_LNC1138	6	6697564	6801246	-	6:6697564-6801246:-	AL031123.1,BTF3P7	NA	M2,	M1,M0,	Promoter Flanking Region,Enhancer,	6	4450	lnc-F13A1-3	lnc-F13A1-3:22	j	NONHSAG042935.2	NONHSAT107561.2	j	AL031123.1	ENST00000648205.1	j	yes
MN298673	LHRI_LNC1577.1	LHRI_LNC1577	9	136928946	136929192	+	9:136928946-136929192:+	NA	NA	M0,M1,M2,	NA	Enhancer,	1	247	-	-	u	-	-	u	-	-	u		Yes
MN297252	LHRI_LNC2065.1	LHRI_LNC2065	14	50838982	50840116	-	14:50838982-50840116:-	NA	NA	M2,	NA	Open chromatin,	1	1135	lnc-ABHD12B-2	lnc-ABHD12B-2:1	i	NONHSAG068767.1	NONHSAT168418.1	i	-	-	u
MK280541	LHRI_LNC1274.1	LHRI_LNC1274	7	44031540	44032313	-	7:44031540-44032313:-	RASA4CP	NA	M1,M0,M2,	NA	NA	1	774	lnc-PGAM2-3	lnc-PGAM2-3:2	i	NONHSAG047468.2	NONHSAT120333.2	i	AC017116.2	ENST00000648264.1	i	yes
MN296879	LHRI_LNC718.1	LHRI_LNC718	1	153671259	153671498	+	1:153671259-153671498:+	NA	M0,M1,	M2,M1,M0,	NA	Promoter,	1	240	-	-	u	-	-	u	-	-	u		Yes
MN297931	LHRI_LNC755.1	LHRI_LNC755	22	46069672	46070792	+	22:46069672-46070792:+	AL121672.2	M0,M1,	NA	M0,M1,	Promoter,	1	1121	lnc-PRR34-3	lnc-PRR34-3:2	x	NONHSAG034159.2	NONHSAT192992.1	x	AL121672.2	ENST00000412643.1	x	yes
MN297185	LHRI_LNC1986.1	LHRI_LNC1986	12	104357117	104357413	+	12:104357117-104357413:+	NA	NA	M0,M1,M2,	NA	CTCF Binding Site,Open chromatin,Enhancer,	1	297	-	-	u	NONHSAG012131.1	NONHSAT030400.1	c	-	-	u
MN296803	LHRI_LNC1940.1	LHRI_LNC1940	1	30129513	30129905	-	1:30129513-30129905:-	NA	NA	M0,	NA	Promoter Flanking Region,TF binding site,	1	393	-	-	u	-	-	u	-	-	u		Yes
MN297882	LHRI_LNC688.1	LHRI_LNC688	21	29056418	29056706	+	21:29056418-29056706:+	CCT8	NA	M1,M0,M2,	NA	Open chromatin,	1	289	-	-	u	NONHSAG032612.2	NONHSAT190829.1	p	-	-	u
MK280538	LHRI_LNC1273.1	LHRI_LNC1273	7	43991651	43992633	-	7:43991651-43992633:-	POLR2J4	NA	M2,M0,M1,	NA	TF binding site,Open chromatin,	2	734	lnc-URGCP-2	lnc-URGCP-2:10	i	-	-	u	POLR2J4	ENST00000427076.5	i	yes
MN297012	LHRI_LNC1783.1	LHRI_LNC1783	10	111022059	111022298	+	10:111022059-111022298:+	NA	NA	M1,M0,M2,	NA	NA	1	240	lnc-SHOC2-1	lnc-SHOC2-1:2	c	NONHSAG006873.2	NONHSAT016379.2	c	-	-	u
MN297902	LHRI_LNC714.1	LHRI_LNC714	22	19977660	19977892	-	22:19977660-19977892:-	ARVCF	NA	M0,M1,M2,	NA	NA	1	233	-	-	u	NONHSAG083889.1	NONHSAT192643.1	c	-	-	u
MN297757	LHRI_LNC584.1	LHRI_LNC584	2	203309495	203309717	+	2:203309495-203309717:+	NA	NA	M2,M0,M1,	NA	NA	1	223	-	-	u	NONHSAG030279.1	NONHSAT076456.1	i	-	-	u
MN297797	LHRI_LNC632.1	LHRI_LNC632	20	20016256	20016545	+	20:20016256-20016545:+	NA	M0,M1,	M2,	NA	Promoter,	1	290	-	-	u	-	-	u	-	-	u		Yes
MN298200	LHRI_LNC1066.1	LHRI_LNC1066	5	87369061	87369352	-	5:87369061-87369352:-	RASA1	NA	M1,M0,M2,	NA	NA	1	292	-	-	u	-	-	u	-	-	u		Yes
MN296897	LHRI_LNC1099.1	LHRI_LNC1099	1	181095979	181096291	+	1:181095979-181096291:+	NA	NA	M1,M0,M2,	NA	Promoter Flanking Region,	1	313	lnc-STX6-6	lnc-STX6-6:7	x	NONHSAG003643.2	NONHSAT152615.1	x	-	-	u
MN297169	LHRI_LNC1972.1	LHRI_LNC1972	12	68966818	68971792	+	12:68966818-68971792:+	CPM	NA	M2,	NA	Promoter Flanking Region,Enhancer,	2	1855	lnc-CPM-4	lnc-CPM-4:2	x	-	-	u	-	-	u
MN297478	LHRI_LNC221.1	LHRI_LNC221	17	44183423	44183785	-	17:44183423-44183785:-	ASB16-AS1	M0,M1,	M1,M0,M2,	NA	Promoter,	1	363	ASB16-AS1	ASB16-AS1:9	i	NONHSAG021911.2	NONHSAT053905.2	i	ASB16-AS1	ENST00000585457.5	i	Yes?
MN298063	LHRI_LNC900.1	LHRI_LNC900	3	183824361	183825040	-	3:183824361-183825040:-	AC131160.1	M1,M0,	M2,M1,M0,	NA	Promoter,	1	680	lnc-PARL-2	lnc-PARL-2:1	i	-	-	u	-	-	u
MN298385	LHRI_LNC1268.1	LHRI_LNC1268	7	37745104	37746461	+	7:37745104-37746461:+	EPDR1	NA	M2,M1,	NA	NA	1	1358	lnc-GPR141-3	lnc-GPR141-3:1	i	NONHSAG096286.1	NONHSAT211955.1	i	-	-	u
MN297029	LHRI_LNC1803.1	LHRI_LNC1803	11	7511563	7511808	-	11:7511563-7511808:-	AC107884.1	M1,M0,	NA	M1,M0,	Promoter Flanking Region,Promoter,	1	246	lnc-CYB5R2-3	lnc-CYB5R2-3:16	i	NONHSAG007561.1	NONHSAT017773.1	i	AC107884.1	ENST00000530201.1	i	Yes?
MN296960	LHRI_LNC1708.1	LHRI_LNC1708	10	27549322	27549704	+	10:27549322-27549704:+	NA	NA	M1,M0,M2,	NA	NA	1	383	-	-	u	NONHSAG005462.1	NONHSAT011897.1	i	-	-	u
MN297116	LHRI_LNC1903.1	LHRI_LNC1903	12	1939948	1940284	-	12:1939948-1940284:-	NA	NA	M0,M1,M2,	NA	TF binding site,	1	337	-	-	u	NONHSAG010177.1	NONHSAT025430.1	x	-	-	u
MN296883	LHRI_LNC806.1	LHRI_LNC806	1	155850227	155850766	-	1:155850227-155850766:-	GON4L	NA	M1,M0,M2,	NA	NA	1	540	lnc-RIT1-3	lnc-RIT1-3:1	i	NONHSAG003085.2	NONHSAT006764.2	i	-	-	u
MN296990	LHRI_LNC1754.1	LHRI_LNC1754	10	79832299	79832513	+	10:79832299-79832513:+	NA	NA	M2,M0,M1,	NA	NA	1	215	lnc-NUTM2E-1	lnc-NUTM2E-1:5	c	NONHSAG006343.2	NONHSAT155763.1	i	-	-	u
MN297668	LHRI_LNC472.1	LHRI_LNC472	2	71000397	71002196	-	2:71000397-71002196:-	AC007040.1	NA	NA	NA	CTCF Binding Site,Promoter Flanking Region,	1	1800	lnc-TEX261-2	lnc-TEX261-2:1	p	NONHSAG028135.2	NONHSAT071530.2	i	AC007040.1	ENST00000416229.1	i	yes
MN297659	LHRI_LNC455.1	LHRI_LNC455	2	53669555	53669874	-	2:53669555-53669874:-	ASB3	NA	M2,M0,M1,	NA	TF binding site,	1	320	lnc-GPR75-3	lnc-GPR75-3:1	p	-	-	u	-	-	u
MN297214	LHRI_LNC2028.1	LHRI_LNC2028	13	60164084	60164361	+	13:60164084-60164361:+	NA	M1,M0,	NA	NA	Promoter,Promoter Flanking Region,Open chromatin,	1	278	lnc-TDRD3-14	lnc-TDRD3-14:1	c	-	-	u	-	-	u
MN298198	LHRI_LNC1064.1	LHRI_LNC1064	5	86999324	87002629	-	5:86999324-87002629:-	AC109492.1	NA	NA	NA	Open chromatin,	2	1726	lnc-RASA1-2	lnc-RASA1-2:1	i	NONHSAG091091.1	NONHSAT204409.1	o	AC109492.1	ENST00000503349.1	i	yes
MN297781	LHRI_LNC614.1	LHRI_LNC614	20	1808618	1808843	-	20:1808618-1808843:-	AL121760.1	NA	M2,M0,M1,	M0,	Promoter Flanking Region,	1	226	lnc-SIRPG-5	lnc-SIRPG-5:1	i	NONHSAG031114.2	NONHSAT189201.1	i	AL121760.1	ENST00000447206.1	i	yes
MN297295	LHRI_LNC2119.1	LHRI_LNC2119	15	49850777	49851062	-	15:49850777-49851062:-	NA	NA	M2,M1,M0,	NA	Open chromatin,Promoter Flanking Region,	1	286	-	-	u	-	-	u	-	-	u		Yes
MN297809	LHRI_LNC651.1	LHRI_LNC651	20	35472918	35473120	-	20:35472918-35473120:-	CEP250	NA	M2,M1,M0,	NA	NA	1	203	-	-	u	-	-	u	-	-	u		Yes
MN297694	LHRI_LNC504.1	LHRI_LNC504	2	97490096	97490564	-	2:97490096-97490564:-	NA	NA	M2,M1,M0,	NA	NA	1	469	lnc-ANKRD36B-8	lnc-ANKRD36B-8:1	p	NONHSAG028655.2	NONHSAT072649.2	e	-	-	u
MN298425	LHRI_LNC1309.1	LHRI_LNC1309	7	100219174	100219466	-	7:100219174-100219466:-	STAG3	NA	M1,M0,M2,	NA	CTCF Binding Site,Promoter Flanking Region,	1	293	lnc-PVRIG-1	lnc-PVRIG-1:1	x	-	-	u	-	-	u
MN298446	LHRI_LNC1339.1	LHRI_LNC1339	7	131045641	131045886	-	7:131045641-131045886:-	AC016831.7	NA	M2,M0,M1,	NA	NA	1	246	LINC00513	LINC00513:13	x	NONHSAG048817.2	NONHSAT123371.2	x	AC016831.6	ENST00000644432.1	i	yes
MN297304	LHRI_LNC2129.1	LHRI_LNC2129	15	65895854	65896207	+	15:65895854-65896207:+	MEGF11	NA	M1,M0,M2,	NA	NA	1	354	-	-	u	-	-	u	-	-	u		Yes
MK280180	LHRI_LNC73.1	LHRI_LNC73	16	2606710	2607738	+	16:2606710-2607738:+	AC141586.1	M0,M1,	M2,M0,M1,	NA	Promoter,Open chromatin,	1	1029	lnc-CEMP1-10	lnc-CEMP1-10:1	x	NONHSAG018340.1	NONHSAT052139.1	x	-	-	u
MN297571	LHRI_LNC335.1	LHRI_LNC335	19	17195156	17195371	-	19:17195156-17195371:-	MYO9B	NA	M2,M0,M1,	NA	NA	1	216	-	-	u	-	-	u	-	-	u		Yes
MK280655	LHRI_LNC1642.1	LHRI_LNC1642	X	53967629	53968073	+	X:53967629-53968073:+	PHF8	NA	M0,M1,M2,	NA	CTCF Binding Site,	1	445	-	-	u	-	-	u	-	-	u		Yes
MN297811	LHRI_LNC654.1	LHRI_LNC654	20	36890295	36890551	+	20:36890295-36890551:+	SAMHD1	NA	M2,M1,M0,	NA	Promoter Flanking Region,	1	257	-	-	u	NONHSAG081493.1	NONHSAT188694.1	o	-	-	u
MK280138	LHRI_LNC2053.1	LHRI_LNC2053	14	24239693	24240080	+	14:24239693-24240080:+	TINF2	M1,M0,	M0,M1,M2,	NA	Open chromatin,Promoter,	1	388	lnc-TINF2-1	lnc-TINF2-1:5	x	NONHSAG014510.1	NONHSAT035945.1	p	-	-	u
MN297677	LHRI_LNC486.2	LHRI_LNC486	2	85883312	85904694	+	2:85883312-85904694:+	ST3GAL5-AS1,AC012511.1	NA	M1,M0,M2,	NA	CTCF Binding Site,	3	1027	ST3GAL5-AS1	ST3GAL5-AS1:4	j	NONHSAG028405.2	NONHSAT072064.2	j	AC012511.1	ENST00000608140.1	o	yes
MN298667	LHRI_LNC1576.1	LHRI_LNC1576	9	136374374	136374698	+	9:136374374-136374698:+	NA	M1,M0,	M1,M0,M2,	M0,	Promoter Flanking Region,	1	325	-	-	u	-	-	u	-	-	u		Yes
MN297385	LHRI_LNC140.1	LHRI_LNC140	16	72818012	72818285	-	16:72818012-72818285:-	ZFHX3	NA	M0,M1,M2,	NA	CTCF Binding Site,Open chromatin,	1	274	lnc-DHX38-27	lnc-DHX38-27:3	i	NONHSAG019942.1	NONHSAT143596.1	i	-	-	u
MN296949	LHRI_LNC1664.1	LHRI_LNC1664	10	911742	924885	-	10:911742-924885:-	LARP4B	NA	M0,M1,M2,	NA	NA	2	389	lnc-GTPBP4-3	lnc-GTPBP4-3:2	x	NONHSAG004969.2	NONHSAT156470.1	j	-	-	u
MN298237	LHRI_LNC1120.1	LHRI_LNC1120	5	177050213	177050535	+	5:177050213-177050535:+	ZNF346	NA	M0,M1,M2,	NA	NA	1	323	-	-	u	NONHSAG042370.1	NONHSAT105448.1	i	-	-	u
MN298387	LHRI_LNC1271.1	LHRI_LNC1271	7	38341577	38373915	+	7:38341577-38373915:+	TRG-AS1	NA	M1,M0,	NA	Promoter Flanking Region,CTCF Binding Site,	5	1388	TRG-AS1	TRG-AS1:7	j	NONHSAG047376.2	NONHSAT120179.2	j	TRG-AS1	ENST00000629357.1	j	yes
MN298449	LHRI_LNC1342.1	LHRI_LNC1342	7	134986718	134987097	+	7:134986718-134987097:+	AGBL3	M1,M0,	M2,	NA	Promoter,	1	380	-	-	u	-	-	u	-	-	u		Yes
MN297908	LHRI_LNC723.1	LHRI_LNC723	22	25347001	25347223	-	22:25347001-25347223:-	NA	NA	M2,M1,M0,	NA	Open chromatin,	1	223	lnc-LRP5L-14	lnc-LRP5L-14:1	c	-	-	u	-	-	u
MN298213	LHRI_LNC1084.1	LHRI_LNC1084	5	130030113	130033924	-	5:130030113-130033924:-	CHSY3	NA	NA	NA	Open chromatin,	1	3812	-	-	u	-	-	u	-	-	u		Yes
MK280595	LHRI_LNC1434.5	LHRI_LNC1434	8	103080256	103140605	+	8:103080256-103140605:+	LINC01181	NA	NA	M1,M0,	Promoter Flanking Region,	6	2084	LINC01181	LINC01181:3	j	NONHSAG050978.2	NONHSAT128155.2	j	LINC01181	ENST00000503718.2	j	yes
MN297790	LHRI_LNC626.1	LHRI_LNC626	20	11892740	11893072	+	20:11892740-11893072:+	BTBD3	M1,M0,	NA	NA	Promoter,Promoter Flanking Region,	1	333	-	-	u	NONHSAG031282.1	NONHSAT078648.1	i	-	-	u
MN298057	LHRI_LNC891.1	LHRI_LNC891	3	160572801	160573987	+	3:160572801-160573987:+	NA	NA	M1,M0,M2,	NA	CTCF Binding Site,	1	1187	-	-	u	-	-	u	-	-	u		Yes
MN297948	LHRI_LNC772.7	LHRI_LNC772	3	11192254	11225922	-	3:11192254-11225922:-	HRH1	M0,M1,	M2,M1,M0,	M0,M1,	Enhancer,Promoter,Open chromatin,	5	5892	lnc-VGLL4-9	lnc-VGLL4-9:4	j	NONHSAG085340.1	NONHSAT195410.1	j	AC083855.2	ENST00000648436.1	j	yes
MN297716	LHRI_LNC528.4	LHRI_LNC528	2	122761013	122887512	+	2:122761013-122887512:+	NA	NA	NA	NA	NA	9	2344	lnc-TSN-18	lnc-TSN-18:1	j	NONHSAG029152.2	NONHSAT074089.2	j	-	-	u
MN298375	LHRI_LNC1251.1	LHRI_LNC1251	7	1051445	1051673	+	7:1051445-1051673:+	C7orf50	NA	M0,M2,	M2,	Enhancer,Promoter Flanking Region,	1	229	-	-	u	-	-	u	-	-	u		Yes
MN296920	LHRI_LNC1313.1	LHRI_LNC1313	1	211306967	211307477	+	1:211306967-211307477:+	RCOR3	NA	M2,M0,M1,	NA	Open chromatin,	1	511	lnc-TRAF5-8	lnc-TRAF5-8:1	p	NONHSAG004193.2	NONHSAT009285.2	p	-	-	u
MK280265	LHRI_LNC337.2	LHRI_LNC337	19	17489801	17511686	-	19:17489801-17511686:-	AC010618.3	M0,M1,	M2,M1,M0,	M1,M2,M0,	Enhancer,Promoter,	4	823	lnc-NXNL1-3	lnc-NXNL1-3:9	j	NONHSAG025094.2	NONHSAT062893.2	j	AC010618.3	ENST00000596643.5	j	yes
MN298541	LHRI_LNC1451.1	LHRI_LNC1451	8	133898943	133899237	-	8:133898943-133899237:-	AC110741.1	NA	NA	M0,M1,	Promoter Flanking Region,	1	295	lnc-WISP1-4	lnc-WISP1-4:2	i	NONHSAG051346.2	NONHSAT129247.2	i	AC110741.1	ENST00000520149.2	i	yes
MN298306	LHRI_LNC1185.1	LHRI_LNC1185	6	52302217	52308281	-	6:52302217-52308281:-	NA	NA	M2,	M0,	CTCF Binding Site,Promoter Flanking Region,	2	386	-	-	u	-	-	u	-	-	u		Yes
MN297410	LHRI_LNC169.9	LHRI_LNC169	17	6996269	7012331	-	17:6996269-7012331:-	ALOX12-AS1	M1,M0,	M0,M1,M2,	M1,M0,	Promoter,	4	1180	lnc-SLC16A11-7	lnc-SLC16A11-7:5	j	NONHSAG020671.2	NONHSAT175889.1	j	ALOX12-AS1	ENST00000574377.5	j	yes
MN298474	LHRI_LNC1376.1	LHRI_LNC1376	8	11888066	11889752	+	8:11888066-11889752:+	NA	NA	NA	M1,M0,	Enhancer,Promoter Flanking Region,	2	741	-	-	u	-	-	u	-	-	u		Yes
MN297336	LHRI_LNC67.1	LHRI_LNC67	16	724090	724351	+	16:724090-724351:+	CCDC78	M0,M1,	M1,M0,M2,	NA	Promoter,	1	262	lnc-CCDC78-1	lnc-CCDC78-1:2	x	NONHSAG018199.1	NONHSAT051826.1	o	-	-	u
MN297788	LHRI_LNC624.1	LHRI_LNC624	20	5541631	5542004	-	20:5541631-5542004:-	NA	NA	M0,M1,M2,	NA	Open chromatin,	1	374	-	-	u	-	-	u	-	-	u		Yes
MN297344	LHRI_LNC78.5	LHRI_LNC78	16	3078320	3087087	-	16:3078320-3087087:-	AC108134.3	M1,	M2,	NA	Promoter,CTCF Binding Site,	3	548	lnc-ZSCAN10-1	lnc-ZSCAN10-1:6	j	NONHSAG018390.2	NONHSAT147954.2	j	AC108134.3	ENST00000571404.5	j	yes
MN298316	LHRI_LNC1196.1	LHRI_LNC1196	6	81753510	81753979	+	6:81753510-81753979:+	NA	M1,M0,	NA	M0,	Promoter,	1	470	lnc-TPBG-10	lnc-TPBG-10:4	c	-	-	u	-	-	u
MN298363	LHRI_LNC1239.1	LHRI_LNC1239	6	166646192	166649088	+	6:166646192-166649088:+	RPS6KA2	NA	NA	NA	CTCF Binding Site,	2	545	-	-	u	-	-	u	-	-	u		Yes
MN298553	LHRI_LNC1467.1	LHRI_LNC1467	8	145048414	145048676	-	8:145048414-145048676:-	AC139103.1	NA	NA	NA	Promoter,	1	263	lnc-C8orf33-1	lnc-C8orf33-1:1	x	NONHSAG051590.2	NONHSAT129870.2	x	-	-	u
MN298482	LHRI_LNC1378.1	LHRI_LNC1378	8	12547488	12547830	-	8:12547488-12547830:-	AC068587.4	NA	M2,M1,M0,	NA	NA	1	343	lnc-ZNF705D-2	lnc-ZNF705D-2:36	x	NONHSAG049565.2	NONHSAT125148.2	x	AC068587.4	ENST00000635775.1	i	yes
MK280259	LHRI_LNC301.2	LHRI_LNC301	18	77112640	77115726	+	18:77112640-77115726:+	AC018529.2	NA	M0,M1,M2,	M0,	Promoter Flanking Region,	2	2597	lnc-GALR1-5	lnc-GALR1-5:1	j	NONHSAG074938.1	NONHSAT178062.1	j	AC018529.2	ENST00000612024.1	j	yes
MN297494	LHRI_LNC247.1	LHRI_LNC247	17	59694799	59695022	-	17:59694799-59695022:-	CLTC	NA	M2,M1,M0,	NA	NA	1	224	lnc-PTRH2-2	lnc-PTRH2-2:1	i	-	-	u	-	-	u
MN297741	LHRI_LNC561.1	LHRI_LNC561	2	184663003	184663242	+	2:184663003-184663242:+	ZNF804A	NA	M2,M1,M0,	NA	NA	1	240	-	-	u	-	-	u	-	-	u		Yes
MN298368	LHRI_LNC1245.1	LHRI_LNC1245	7	130368	130735	+	7:130368-130735:+	NA	NA	NA	M0,	Promoter Flanking Region,Enhancer,	1	368	lnc-PDGFA-11	lnc-PDGFA-11:1	x	NONHSAG096869.1	NONHSAT213034.1	x	-	-	u
MN296989	LHRI_LNC1752.1	LHRI_LNC1752	10	79732906	79733221	-	10:79732906-79733221:-	NUTM2B-AS1	NA	M2,M0,	NA	NA	1	316	NUTM2B-AS1	NUTM2B-AS1:42	i	NONHSAG006340.2	NONHSAT015166.2	i	NUTM2B-AS1	ENST00000601369.5	i	Yes?
MN296988	LHRI_LNC1747.1	LHRI_LNC1747	10	75700877	75701125	+	10:75700877-75701125:+	LRMDA	NA	M0,	NA	NA	1	249	-	-	u	-	-	u	-	-	u		Yes
MK280191	LHRI_LNC100.5	LHRI_LNC100	16	27247263	27257647	+	16:27247263-27257647:+	AC106739.1,NSMCE1	NA	M2,M1,	NA	Promoter Flanking Region,	2	565	lnc-GTF3C1-4	lnc-GTF3C1-4:2	x	NONHSAG018961.1	NONHSAT141435.1	x	-	-	u
MN296773	LHRI_LNC1848.1	LHRI_LNC1848	1	1019569	1019840	+	1:1019569-1019840:+	NA	M1,M0,	M1,	NA	Promoter,	1	272	-	-	u	NONHSAG000072.1	NONHSAT000240.1	x	-	-	u
MN298671	LHRI_LNC1581.1	LHRI_LNC1581	9	136838610	136838961	-	9:136838610-136838961:-	RABL6	NA	M0,M1,M2,	NA	NA	1	352	CCDC183-AS1	CCDC183-AS1:4	i	NONHSAG053814.2	NONHSAT135605.2	i	-	-	u
MN297680	LHRI_LNC488.31	LHRI_LNC488	2	87469950	87521413	+	2:87469950-87521413:+	AC133644.3,CYTOR	NA	M2,M1,M0,	NA	Promoter Flanking Region,	2	351	CYTOR	CYTOR:110	j	NONHSAG028438.2	NONHSAT072150.2	j	CYTOR	ENST00000414584.1	j	yes
MN296979	LHRI_LNC1730.1	LHRI_LNC1730	10	46597095	46597364	-	10:46597095-46597364:-	AL356056.2	M1,	M1,	NA	Enhancer,Promoter,	1	270	lnc-GPRIN2-1	lnc-GPRIN2-1:2	i	NONHSAG005784.1	NONHSAT013123.1	i	AL356056.2	ENST00000506914.1	i	yes
MN297457	LHRI_LNC217.11	LHRI_LNC217	17	43239584	43245864	-	17:43239584-43245864:-	RF00004	M2,M1,M0,	M2,	M0,M1,M2,	Promoter Flanking Region,Promoter,	3	528	lnc-LINC00854-1	lnc-LINC00854-1:21	i	NONHSAG021878.2	NONHSAT053835.2	i	-	-	u
MK280351	LHRI_LNC665.1	LHRI_LNC665	20	50324818	50328393	-	20:50324818-50328393:-	NA	NA	M2,	NA	Open chromatin,	2	751	-	-	u	-	-	u	-	-	u		Yes
MN298386	LHRI_LNC1269.1	LHRI_LNC1269	7	37755036	37762932	+	7:37755036-37762932:+	EPDR1	NA	NA	NA	NA	1	7897	lnc-SFRP4-3	lnc-SFRP4-3:1	x	NONHSAG096286.1	NONHSAT211955.1	i	-	-	u
MN298367	LHRI_LNC1244.1	LHRI_LNC1244	7	119659	120349	+	7:119659-120349:+	NA	NA	NA	M0,M1,	Promoter Flanking Region,TF binding site,	1	691	lnc-PDGFA-11	lnc-PDGFA-11:1	i	NONHSAG096067.1	NONHSAT211515.1	c	-	-	u
MK279974	LHRI_LNC593.6	LHRI_LNC593	1	149607467	149647619	+	1:149607467-149647619:+	LINC00869	M0,M1,	NA	NA	Promoter,CTCF Binding Site,	3	793	lnc-PPIAL4C-4	lnc-PPIAL4C-4:14	j	NONHSAG002812.2	NONHSAT149765.1	j	AC242842.1	ENST00000617712.1	y	yes
MN298454	LHRI_LNC1346.1	LHRI_LNC1346	7	139022315	139022611	-	7:139022315-139022611:-	NA	NA	M2,M0,M1,	NA	NA	1	297	-	-	u	NONHSAG096710.1	NONHSAT212774.1	x	-	-	u
MN297430	LHRI_LNC193.1	LHRI_LNC193	17	30118800	30119033	+	17:30118800-30119033:+	NSRP1	M0,M1,	M0,M1,M2,	M0,	Promoter,	1	234	-	-	u	NONHSAG021385.2	NONHSAT175067.1	p	-	-	u
MK280312	LHRI_LNC530.1	LHRI_LNC530	2	130211184	130212515	-	2:130211184-130212515:-	AC018804.1	NA	M2,M1,M0,	NA	Promoter Flanking Region,	1	1332	-	-	u	-	-	u	-	-	u		Yes
MN297627	LHRI_LNC420.1	LHRI_LNC420	2	24088135	24088395	+	2:24088135-24088395:+	FAM228B	NA	M2,M0,M1,	NA	NA	1	261	-	-	u	NONHSAG027227.2	NONHSAT181438.1	i	-	-	u
MN296886	LHRI_LNC828.1	LHRI_LNC828	1	156502563	156502834	-	1:156502563-156502834:-	NA	M0,M1,	NA	M1,M0,	Promoter,	1	272	lnc-MEF2D-1	lnc-MEF2D-1:1	i	NONHSAG003122.2	NONHSAT006882.2	i	-	-	u
MN297191	LHRI_LNC1994.1	LHRI_LNC1994	12	110449935	110456284	+	12:110449935-110456284:+	ARPC3	M1,M0,	M2,M0,M1,	M0,M1,M2,	Promoter,	2	844	lnc-ARPC3-2	lnc-ARPC3-2:1	x	NONHSAG065028.1	NONHSAT162755.1	j	-	-	u
MN297427	LHRI_LNC189.1	LHRI_LNC189	17	19678807	19679020	+	17:19678807-19679020:+	SLC47A2	NA	M2,M0,M1,	NA	Open chromatin,	1	214	-	-	u	-	-	u	-	-	u		Yes
MK280393	LHRI_LNC758.1	LHRI_LNC758	22	46596992	46602232	-	22:46596992-46602232:-	GRAMD4	NA	M1,M2,	M0,	Promoter Flanking Region,Enhancer,	2	3417	lnc-CDPF1-1	lnc-CDPF1-1:2	i	NONHSAG084038.1	NONHSAT192994.1	i	-	-	u
MN297260	LHRI_LNC2074.1	LHRI_LNC2074	14	68810852	68811106	-	14:68810852-68811106:-	NA	NA	M2,	NA	Enhancer,Promoter Flanking Region,	1	255	-	-	u	NONHSAG015292.1	NONHSAT037476.1	x	-	-	u
MN298415	LHRI_LNC1298.3	LHRI_LNC1298	7	76549411	76621388	+	7:76549411-76621388:+	AC004980.1	M1,M0,	M0,M1,M2,	M1,M0,	Promoter,	4	1001	lnc-UPK3B-5	lnc-UPK3B-5:4	j	NONHSAG048029.2	NONHSAT121617.2	j	-	-	u
MK280213	LHRI_LNC169.7	LHRI_LNC169	17	6994642	7012331	-	17:6994642-7012331:-	ALOX12-AS1	M0,M1,	M1,M0,M2,	M1,M0,	Promoter,	5	4013	lnc-SLC16A11-7	lnc-SLC16A11-7:5	j	NONHSAG020671.2	NONHSAT175889.1	j	ALOX12-AS1	ENST00000574377.5	j	yes
MN297812	LHRI_LNC653.1	LHRI_LNC653	20	37073053	37077623	+	20:37073053-37077623:+	RBL1	NA	M2,M0,M1,	NA	Enhancer,	2	241	-	-	u	NONHSAG031750.1	NONHSAT079686.1	o	-	-	u
MK280454	LHRI_LNC1019.6	LHRI_LNC1019	5	1598028	1633906	-	5:1598028-1633906:-	AC026412.1	M1,	M2,M1,M0,	NA	TF binding site,Promoter,	5	1649	lnc-LPCAT1-4	lnc-LPCAT1-4:14	c	NONHSAG039676.2	NONHSAT100037.2	c	AC026412.3	ENST00000605200.1	x	yes
MN297841	LHRI_LNC675.1	LHRI_LNC675	20	64316714	64318370	-	20:64316714-64318370:-	NA	NA	NA	NA	Open chromatin,	1	1657	-	-	u	-	-	u	-	-	u		Yes
MN297520	LHRI_LNC280.1	LHRI_LNC280	18	2843435	2844059	+	18:2843435-2844059:+	NA	NA	NA	M0,	TF binding site,Open chromatin,	1	625	-	-	u	-	-	u	-	-	u		Yes
MN296915	LHRI_LNC1250.1	LHRI_LNC1250	1	204621144	204621511	+	1:204621144-204621511:+	LRRN2	NA	NA	NA	CTCF Binding Site,TF binding site,	2	225	lnc-PIK3C2B-1	lnc-PIK3C2B-1:1	i	NONHSAG004035.1	NONHSAT008959.1	i	-	-	u
MN297642	LHRI_LNC432.26	LHRI_LNC432	2	32916230	32916605	-	2:32916230-32916605:-	LINC00486	NA	M2,M1,M0,	NA	TF binding site,	2	325	LINC00486	LINC00486:4	i	NONHSAG027432.2	NONHSAT069993.2	x	LINC00486	ENST00000414054.5	i	yes
MK280161	LHRI_LNC2115.15	LHRI_LNC2115	15	41283990	41306534	+	15:41283990-41306534:+	OIP5-AS1	M1,M0,	M2,M0,M1,	M0,	Promoter,Open chromatin,	5	9027	OIP5-AS1	OIP5-AS1:25	k	NONHSAG016639.2	NONHSAT041921.2	j	OIP5-AS1	ENST00000501665.2	j	yes
MK280386	LHRI_LNC738.1	LHRI_LNC738	22	36226698	36226929	+	22:36226698-36226929:+	APOL2	NA	M2,M1,M0,	NA	Open chromatin,	1	232	-	-	u	NONHSAG033827.2	NONHSAT192869.1	x	-	-	u
MK280207	LHRI_LNC154.1	LHRI_LNC154	16	84566695	84566927	+	16:84566695-84566927:+	COTL1	NA	M1,M0,M2,	NA	NA	1	233	lnc-TLDC1-2	lnc-TLDC1-2:1	x	NONHSAG020166.2	NONHSAT173379.1	c	-	-	u
MN297078	LHRI_LNC1851.1	LHRI_LNC1851	11	67288616	67288959	-	11:67288616-67288959:-	ANKRD13D	M1,	M0,M1,M2,	M0,M1,	Promoter,	1	344	-	-	u	-	-	u	-	-	u		Yes
MN297073	LHRI_LNC1847.1	LHRI_LNC1847	11	65806239	65818227	-	11:65806239-65818227:-	NA	M0,M1,	M2,M1,M0,	M1,M0,	CTCF Binding Site,Promoter Flanking Region,	2	10623	lnc-CFL1-1	lnc-CFL1-1:8	k	NONHSAG008704.2	NONHSAT022221.2	k	-	-	u
MN297300	LHRI_LNC2126.1	LHRI_LNC2126	15	64866740	64882441	-	15:64866740-64882441:-	AC069368.1	NA	M0,M1,M2,	M1,M0,	Promoter Flanking Region,	3	633	-	-	u	-	-	u	-	-	u		Yes
MN297302	LHRI_LNC2127.1	LHRI_LNC2127	15	64882514	64882868	+	15:64882514-64882868:+	AC069368.1	NA	M0,M1,	M0,M1,	Promoter Flanking Region,	1	355	-	-	u	-	-	u	-	-	u		Yes
MK279935	LHRI_LNC1706.1	LHRI_LNC1706	1	527613	527860	-	1:527613-527860:-	NA	NA	M0,M1,M2,	NA	NA	1	248	LINC00115	LINC00115:24	i	NONHSAG000027.1	NONHSAT000080.1	i	-	-	u
MN298117	LHRI_LNC963.1	LHRI_LNC963	4	75494606	75494806	-	4:75494606-75494806:-	RCHY1	NA	M2,M0,M1,	NA	Promoter Flanking Region,	1	201	lnc-RCHY1-5	lnc-RCHY1-5:7	i	NONHSAG038222.2	NONHSAT096922.2	i	-	-	u
MN297946	LHRI_LNC772.5	LHRI_LNC772	3	11192167	11225927	-	3:11192167-11225927:-	HRH1	M0,M1,	M2,M0,M1,	M1,M0,	Open chromatin,Enhancer,Promoter,	5	5977	lnc-VGLL4-9	lnc-VGLL4-9:3	j	NONHSAG085340.1	NONHSAT195410.1	j	AC083855.2	ENST00000648436.1	j	yes
MN297515	LHRI_LNC274.1	LHRI_LNC274	17	81343626	81343854	-	17:81343626-81343854:-	AC110285.6	M0,M1,	M2,	NA	Promoter,	1	229	lnc-TMEM105-1	lnc-TMEM105-1:1	i	NONHSAG073438.1	NONHSAT175740.1	x	AC110285.6	ENST00000617652.1	p	Yes?
MN298039	LHRI_LNC867.1	LHRI_LNC867	3	138069823	138070040	-	3:138069823-138070040:-	DZIP1L	NA	M2,M0,M1,	NA	CTCF Binding Site,Open chromatin,TF binding site,	1	218	-	-	u	-	-	u	-	-	u		Yes
MN298065	LHRI_LNC905.1	LHRI_LNC905	3	188656538	188656750	-	3:188656538-188656750:-	LPP	NA	M2,	M1,	Enhancer,	1	213	-	-	u	-	-	u	-	-	u		Yes
MN298171	LHRI_LNC1031.1	LHRI_LNC1031	5	40694350	40694662	+	5:40694350-40694662:+	TTC33	NA	M1,M0,M2,	NA	NA	1	313	-	-	u	-	-	u	-	-	u		Yes
MN297987	LHRI_LNC807.1	LHRI_LNC807	3	46098694	46099520	+	3:46098694-46099520:+	NA	NA	NA	M1,M0,	Promoter Flanking Region,	1	827	lnc-CCR3-1	lnc-CCR3-1:1	e	-	-	u	-	-	u
MN298327	LHRI_LNC1210.1	LHRI_LNC1210	6	134365242	134365467	-	6:134365242-134365467:-	NA	NA	M2,	NA	Open chromatin,	1	226	lnc-SGK1-9	lnc-SGK1-9:2	i	-	-	u	-	-	u
MN298710	LHRI_LNC1665.2	LHRI_LNC1665	X	102769174	102829911	+	X:102769174-102829911:+	LINC00630	NA	NA	NA	Promoter,	6	705	LINC00630	LINC00630:47	j	NONHSAG055008.2	NONHSAT137990.2	j	LINC00630	ENST00000440496.5	j	yes
MN296824	LHRI_LNC240.1	LHRI_LNC240	1	89274095	89274399	-	1:89274095-89274399:-	NA	NA	NA	NA	CTCF Binding Site,Promoter Flanking Region,Promoter,	1	305	-	-	u	-	-	u	-	-	u		Yes
MK280157	LHRI_LNC2100.1	LHRI_LNC2100	15	30148373	30148750	+	15:30148373-30148750:+	NA	NA	M2,M0,M1,	NA	TF binding site,CTCF Binding Site,	1	378	-	-	u	NONHSAG016392.1	NONHSAT041307.1	i	-	-	u
MN298471	LHRI_LNC1374.1	LHRI_LNC1374	8	1740595	1755817	-	8:1740595-1755817:-	CLN8	NA	M2,	M0,M1,	Promoter Flanking Region,	3	812	lnc-ERICH1-20	lnc-ERICH1-20:2	j	NONHSAG049364.2	NONHSAT124674.2	x	-	-	u
MN297322	LHRI_LNC57.1	LHRI_LNC57	15	92007934	92008197	+	15:92007934-92008197:+	SLCO3A1	NA	M1,M2,	NA	NA	1	264	-	-	u	NONHSAG017921.1	NONHSAT048501.1	i	-	-	u
MN297929	LHRI_LNC753.6	LHRI_LNC753	22	45134363	45163781	-	22:45134363-45163781:-	NUP50-DT	M1,M0,	M2,M0,M1,	M0,	Promoter,	5	963	NUP50-DT	NUP50-DT:35	j	NONHSAG034128.2	NONHSAT192976.1	j	NUP50-DT	ENST00000426282.6	j	yes
MN298291	LHRI_LNC1161.3	LHRI_LNC1161	6	31394314	31400606	-	6:31394314-31400606:-	AL645933.2	M1,M0,	M2,	M0,	Promoter,	3	1707	lnc-HLA-B-2	lnc-HLA-B-2:4	j	NONHSAG043476.2	NONHSAT208981.1	j	AL645933.2	ENST00000606743.1	o	yes
MK279961	LHRI_LNC343.3	LHRI_LNC343	1	110508110	110569670	+	1:110508110-110569670:+	KCNA2,KCNA3	NA	M2,M0,	M0,M1,	Promoter Flanking Region,	3	995	lnc-PROK1-4	lnc-PROK1-4:3	j	NONHSAG058027.1	NONHSAT152080.1	x	-	-	u
MN297294	LHRI_LNC2117.1	LHRI_LNC2117	15	43197741	43197948	+	15:43197741-43197948:+	EPB42	NA	M2,M0,M1,	NA	CTCF Binding Site,	1	208	lnc-EPB42-1	lnc-EPB42-1:8	i	NONHSAG016688.1	NONHSAT042050.1	i	AC068724.4	ENST00000563128.5	i	yes
MN297406	LHRI_LNC164.1	LHRI_LNC164	17	3727422	3728077	+	17:3727422-3728077:+	ITGAE	NA	M1,M0,M2,	NA	NA	1	656	lnc-P2RX5-5	lnc-P2RX5-5:1	x	NONHSAG073478.1	NONHSAT175842.1	x	-	-	u
MN298095	LHRI_LNC941.1	LHRI_LNC941	4	11429060	11438506	+	4:11429060-11438506:+	HS3ST1	M0,M1,	NA	M0,	Promoter Flanking Region,Promoter,	3	759	lnc-DRD5-29	lnc-DRD5-29:10	j	NONHSAG087396.1	NONHSAT198298.1	o	-	-	u
MN298659	LHRI_LNC1569.3	LHRI_LNC1569	9	129483474	129504274	+	9:129483474-129504274:+	LINC00963	NA	NA	M0,M1,	Promoter,	4	1383	LINC00963	LINC00963:54	j	NONHSAG053586.2	NONHSAT135075.2	j	LINC00963	ENST00000423918.5	j	yes
MN297485	LHRI_LNC230.1	LHRI_LNC230	17	47034400	47034611	+	17:47034400-47034611:+	AC068152.1	NA	M1,M0,M2,	NA	NA	1	212	lnc-RPRML-3	lnc-RPRML-3:20	i	NONHSAG022030.2	NONHSAT054232.2	x	AC068152.1	ENST00000575173.1	i	Yes?
MN297506	LHRI_LNC263.1	LHRI_LNC263	17	75855718	75856525	+	17:75855718-75856525:+	WBP2	M1,M0,	M2,M1,M0,	M0,M1,	Promoter,Promoter Flanking Region,	1	808	lnc-UNK-1	lnc-UNK-1:3	c	NONHSAG073374.1	NONHSAT175617.1	e	-	-	u
MN297200	LHRI_LNC2004.1	LHRI_LNC2004	12	128824126	128824518	+	12:128824126-128824518:+	NA	M1,M0,	M2,	NA	Promoter,	1	393	-	-	u	NONHSAG065188.1	NONHSAT163056.1	i	-	-	u
MN297208	LHRI_LNC2023.1	LHRI_LNC2023	13	48541880	48543093	-	13:48541880-48543093:-	RB1	NA	NA	M0,	Promoter Flanking Region,	1	1214	-	-	u	NONHSAG013471.1	NONHSAT033696.1	e	-	-	u
MN296944	LHRI_LNC1565.1	LHRI_LNC1565	1	241533135	241533456	-	1:241533135-241533456:-	KMO	M0,	M2,M1,	M1,M0,	Promoter Flanking Region,Promoter,	1	322	lnc-FH-8	lnc-FH-8:1	c	-	-	u	-	-	u
MN297899	LHRI_LNC708.3	LHRI_LNC708	21	45288058	45297458	+	21:45288058-45297458:+	LINC00205	M1,	M0,M1,M2,	NA	Promoter,CTCF Binding Site,	2	8233	LINC00205	LINC00205:1	j	NONHSAG033071.2	NONHSAT082932.2	j	LINC00205	ENST00000647108.1	j	yes
MN297649	LHRI_LNC438.1	LHRI_LNC438	2	38557064	38557469	-	2:38557064-38557469:-	NA	NA	M1,M0,M2,	NA	CTCF Binding Site,	1	406	-	-	u	NONHSAG027512.1	NONHSAT070173.1	i	-	-	u
MN297364	LHRI_LNC101.1	LHRI_LNC101	16	28822737	28822940	+	16:28822737-28822940:+	AC145285.6	M0,M1,	M2,M0,M1,	M0,M1,M2,	Open chromatin,Promoter,	1	204	lnc-TUFM-3	lnc-TUFM-3:4	i	NONHSAG018997.2	NONHSAT141528.2	x	AC145285.6	ENST00000614819.1	x	yes
MN297912	LHRI_LNC727.1	LHRI_LNC727	22	26775965	26776268	+	22:26775965-26776268:+	MIATNB	NA	M1,M0,M2,	NA	Open chromatin,	1	304	lnc-CRYBA4-52	lnc-CRYBA4-52:68	c	NONHSAG033588.2	NONHSAT084534.2	x	MIATNB	ENST00000437071.5	i	yes
MN297243	LHRI_LNC2063.9	LHRI_LNC2063	14	49853621	49876010	-	14:49853621-49876010:-	RN7SL2,RN7SL3	NA	NA	NA	NA	3	553	lnc-NEMF-1	lnc-NEMF-1:5	o	NONHSAG014892.2	NONHSAT036752.2	o	AL627171.1	ENST00000618845.1	x	yes
MN297127	LHRI_LNC1913.1	LHRI_LNC1913	12	8788257	8796047	+	12:8788257-8796047:+	AC092490.1	NA	NA	NA	CTCF Binding Site,Promoter Flanking Region,	3	2247	lnc-RIMKLB-6	lnc-RIMKLB-6:1	j	NONHSAG010421.2	NONHSAT026367.2	j	AC092490.1	ENST00000540299.1	j	yes
MN297172	LHRI_LNC1975.1	LHRI_LNC1975	12	82688029	82688269	+	12:82688029-82688269:+	TMTC2	M0,M1,	M2,	M0,	Promoter,	1	241	-	-	u	-	-	u	-	-	u		Yes
MN298040	LHRI_LNC868.1	LHRI_LNC868	3	138115212	138125093	+	3:138115212-138125093:+	DZIP1L	M0,M1,	M2,	NA	Promoter,	3	1589	-	-	u	NONHSAG036193.1	NONHSAT092328.1	y	-	-	u
MN297734	LHRI_LNC554.1	LHRI_LNC554	2	175173279	175173533	-	2:175173279-175173533:-	NA	NA	M2,M1,M0,	NA	NA	1	255	-	-	u	-	-	u	-	-	u		Yes
MN297921	LHRI_LNC742.1	LHRI_LNC742	22	39486920	39487708	-	22:39486920-39487708:-	MGAT3	NA	M2,	NA	Promoter Flanking Region,	1	789	-	-	u	NONHSAG033951.1	NONHSAT086750.1	x	-	-	u
MK279950	LHRI_LNC109.6	LHRI_LNC109	1	58882874	59029995	-	1:58882874-59029995:-	AC105277.1	NA	NA	NA	Enhancer,	4	1386	lnc-JUN-2	lnc-JUN-2:12	j	NONHSAG001627.2	NONHSAT003536.2	j	AC105277.1	ENST00000635492.1	j	yes
MN297346	LHRI_LNC80.1	LHRI_LNC80	16	3502854	3503124	+	16:3502854-3503124:+	CLUAP1	M1,M0,	M2,M1,M0,	NA	Promoter,	1	271	-	-	u	NONHSAG018409.1	NONHSAT148047.1	i	AC004224.2	ENST00000574423.2	i	yes
MK279949	LHRI_LNC109.5	LHRI_LNC109	1	58882874	59029995	-	1:58882874-59029995:-	AC105277.1	NA	NA	NA	Enhancer,	5	1458	lnc-JUN-2	lnc-JUN-2:12	j	NONHSAG001627.2	NONHSAT003536.2	j	AC105277.1	ENST00000635492.1	j	yes
MN297143	LHRI_LNC1934.1	LHRI_LNC1934	12	26273329	26275944	-	12:26273329-26275944:-	AC022509.4	NA	NA	M0,M1,	Open chromatin,Promoter Flanking Region,Enhancer,	2	250	lnc-ITPR2-5	lnc-ITPR2-5:1	o	NONHSAG065358.1	NONHSAT163387.1	o	AC022509.4	ENST00000621404.1	o	yes
MN298626	LHRI_LNC1528.1	LHRI_LNC1528	9	89111624	89111924	-	9:89111624-89111924:-	SHC3	NA	NA	NA	NA	1	301	-	-	u	-	-	u	-	-	u		Yes
MN297688	LHRI_LNC496.1	LHRI_LNC496	2	96485798	96486040	-	2:96485798-96486040:-	NA	NA	M0,M2,	M1,M0,	Promoter Flanking Region,	1	243	-	-	u	NONHSAG028595.1	NONHSAT072513.1	c	-	-	u
MN298206	LHRI_LNC1072.1	LHRI_LNC1072	5	97050523	97050754	+	5:97050523-97050754:+	NA	NA	NA	NA	Promoter Flanking Region,	1	232	-	-	u	-	-	u	-	-	u		Yes
MN298568	LHRI_LNC1483.1	LHRI_LNC1483	9	27075411	27082059	+	9:27075411-27082059:+	NA	NA	M0,M2,	NA	NA	3	1553	-	-	u	-	-	u	-	-	u		Yes
MN298531	LHRI_LNC1440.1	LHRI_LNC1440	8	122785105	122785441	+	8:122785105-122785441:+	ZHX2	M1,	M1,M0,M2,	NA	Promoter,Promoter Flanking Region,	1	337	lnc-DERL1-6	lnc-DERL1-6:1	x	NONHSAG099719.1	NONHSAT217548.1	x	-	-	u
MN297645	LHRI_LNC437.1	LHRI_LNC437	2	37251244	37251469	+	2:37251244-37251469:+	PRKD3	NA	M2,M1,M0,	NA	NA	1	226	-	-	u	-	-	u	-	-	u		Yes
MN297232	LHRI_LNC2052.37	LHRI_LNC2052	14	24007035	24051237	+	14:24007035-24051237:+	AL136419.1,DHRS4L1	NA	M2,	NA	Promoter Flanking Region,	5	1263	lnc-DHRS4L2-2	lnc-DHRS4L2-2:6	j	NONHSAG014518.2	NONHSAT035962.2	j	AL136419.1	ENST00000558293.7	j	yes
MN297152	LHRI_LNC1950.1	LHRI_LNC1950	12	49411712	49412112	+	12:49411712-49412112:+	SPATS2	NA	M0,M1,M2,	NA	Open chromatin,	1	401	-	-	u	NONHSAG011071.1	NONHSAT028058.1	c	-	-	u
MK280088	LHRI_LNC1908.5	LHRI_LNC1908	12	6439239	6451512	-	12:6439239-6451512:-	CD27-AS1	M0,M1,	M1,M0,M2,	M1,M0,	Promoter,	6	1461	CD27-AS1	CD27-AS1:3	j	NONHSAG010301.2	NONHSAT026072.2	j	CD27-AS1	ENST00000545339.5	j	yes
MN297157	LHRI_LNC1957.1	LHRI_LNC1957	12	55731402	55731755	+	12:55731402-55731755:+	RF00017	M0,M1,	M0,M1,M2,	M0,M1,	Promoter Flanking Region,Promoter,	1	354	lnc-GDF11-1	lnc-GDF11-1:7	c	NONHSAG011319.2	NONHSAT028680.2	p	AC009779.2	ENST00000552576.2	p	yes
MN298137	LHRI_LNC992.1	LHRI_LNC992	4	141336159	141336597	+	4:141336159-141336597:+	NA	NA	M2,	NA	Promoter,	1	439	-	-	u	-	-	u	-	-	u		Yes
MN297696	LHRI_LNC509.1	LHRI_LNC509	2	102033127	102033449	-	2:102033127-102033449:-	NA	NA	NA	M0,	Promoter Flanking Region,	1	323	lnc-IL1R2-3	lnc-IL1R2-3:1	i	NONHSAG028746.2	NONHSAT072843.2	i	-	-	u
MN297255	LHRI_LNC2068.1	LHRI_LNC2068	14	55364135	55364343	+	14:55364135-55364343:+	NA	NA	M1,M0,M2,	NA	Open chromatin,	1	209	-	-	u	NONHSAG015019.1	NONHSAT036974.1	i	-	-	u
MN298188	LHRI_LNC1049.1	LHRI_LNC1049	5	61165383	61165862	+	5:61165383-61165862:+	SMIM15-AS1	M1,	M2,	NA	Promoter,Open chromatin,CTCF Binding Site,	1	480	SMIM15-AS1	SMIM15-AS1:22	i	NONHSAG040482.2	NONHSAT202644.1	i	SMIM15-AS1	ENST00000506902.1	i	yes
MN297595	LHRI_LNC375.1	LHRI_LNC375	19	43841896	43842212	+	19:43841896-43842212:+	ZNF283	NA	M0,M1,M2,	NA	NA	1	317	-	-	u	NONHSAG025957.2	NONHSAT066634.2	i	-	-	u
MN297802	LHRI_LNC640.1	LHRI_LNC640	20	31546959	31547180	-	20:31546959-31547180:-	HM13	NA	M1,M0,M2,	NA	Promoter,Open chromatin,	1	222	lnc-DEFB124-3	lnc-DEFB124-3:1	o	NONHSAG081892.1	NONHSAT189564.1	o	-	-	u
MN297339	LHRI_LNC69.1	LHRI_LNC69	16	1613684	1613967	+	16:1613684-1613967:+	CRAMP1	M0,M1,	M0,M1,M2,	NA	Promoter,	1	284	-	-	u	-	-	u	-	-	u		Yes
MN298270	LHRI_LNC1140.1	LHRI_LNC1140	6	14431435	14431796	-	6:14431435-14431796:-	NA	NA	NA	NA	NA	1	362	lnc-DTNBP1-16	lnc-DTNBP1-16:27	c	NONHSAG043059.2	NONHSAT107829.2	i	-	-	u
MN297572	LHRI_LNC341.1	LHRI_LNC341	19	18032310	18032724	+	19:18032310-18032724:+	AC020904.2	NA	M2,M0,M1,	NA	Promoter,Enhancer,	1	415	lnc-ARRDC2-3	lnc-ARRDC2-3:1	c	-	-	u	-	-	u
MN298720	LHRI_LNC1678.1	LHRI_LNC1678	X	135023454	135023687	+	X:135023454-135023687:+	NA	NA	NA	NA	Promoter,	1	234	-	-	u	NONHSAG055369.2	NONHSAT138668.2	p	-	-	u
MN298152	LHRI_LNC1012.1	LHRI_LNC1012	4	184265681	184274226	+	4:184265681-184274226:+	NA	NA	NA	NA	CTCF Binding Site,Open chromatin,Promoter Flanking Region,	2	328	lnc-STOX2-11	lnc-STOX2-11:1	j	NONHSAG039479.2	NONHSAT099514.2	j	-	-	u
MK280205	LHRI_LNC128.1	LHRI_LNC128	16	67108240	67109892	-	16:67108240-67109892:-	NA	M1,M0,	M2,M0,M1,	M1,M0,	Promoter Flanking Region,Promoter,	1	1653	-	-	u	-	-	u	-	-	u		Yes
MN297253	LHRI_LNC2066.2	LHRI_LNC2066	14	53153520	53189936	+	14:53153520-53189936:+	AL356020.1	M0,M1,	M1,	NA	Promoter,	7	997	lnc-STYX-4	lnc-STYX-4:1	j	NONHSAG014992.2	NONHSAT036923.2	j	AL356020.1	ENST00000554235.1	j	yes
MN297351	LHRI_LNC86.1	LHRI_LNC86	16	14914832	14915109	-	16:14914832-14915109:-	AC138932.1	M1,	M1,M0,M2,	NA	TF binding site,	1	278	lnc-NTAN1-5	lnc-NTAN1-5:1	c	NONHSAG018683.1	NONHSAT140709.1	e	-	-	u
MN297780	LHRI_LNC613.1	LHRI_LNC613	20	1805455	1805675	-	20:1805455-1805675:-	AL121760.1	M0,	M1,M0,M2,	M0,M1,	Promoter Flanking Region,	1	221	lnc-PDYN-1	lnc-PDYN-1:8	c	NONHSAG031114.2	NONHSAT189201.1	i	AL121760.1	ENST00000447206.1	i	yes
MN297135	LHRI_LNC1923.1	LHRI_LNC1923	12	11166810	11167054	-	12:11166810-11167054:-	AC018630.2	NA	M2,M0,M1,	NA	NA	1	245	lnc-PRR4-1	lnc-PRR4-1:1	i	NONHSAG010496.1	NONHSAT026912.1	i	AC134349.1	ENST00000543969.1	i	yes
MN297965	LHRI_LNC786.1	LHRI_LNC786	3	31640576	31640845	+	3:31640576-31640845:+	NA	NA	M1,M0,M2,	NA	NA	1	270	-	-	u	NONHSAG034690.1	NONHSAT088843.1	i	-	-	u
MN298017	LHRI_LNC841.1	LHRI_LNC841	3	105364846	105365052	-	3:105364846-105365052:-	NA	M0,M1,	NA	M1,M0,	Promoter,Enhancer,	1	207	-	-	u	-	-	u	-	-	u		Yes
MN297201	LHRI_LNC2007.1	LHRI_LNC2007	13	19411034	19411284	-	13:19411034-19411284:-	SLC25A15P2	NA	M2,	NA	NA	1	251	lnc-MPHOSPH8-6	lnc-MPHOSPH8-6:1	x	NONHSAG012869.1	NONHSAT032215.1	c	-	-	u
MN298523	LHRI_LNC1433.1	LHRI_LNC1433	8	102981050	102981983	+	8:102981050-102981983:+	AP003354.2	NA	M1,	M0,M1,	Promoter Flanking Region,	1	934	lnc-AZIN1-2	lnc-AZIN1-2:1	x	NONHSAG050935.1	NONHSAT128070.1	x	AZIN1-AS1	ENST00000520750.6	i	yes
MN296786	LHRI_LNC1697.1	LHRI_LNC1697	1	12624208	12624630	+	1:12624208-12624630:+	NA	NA	M2,M0,	NA	Open chromatin,Enhancer,	1	423	-	-	u	-	-	u	-	-	u		Yes
MK280370	LHRI_LNC685.2	LHRI_LNC685	21	25560475	25575881	+	21:25560475-25575881:+	MIR155	M1,	NA	M1,	Open chromatin,Promoter,Promoter Flanking Region,	4	2422	MIR155HG	MIR155HG:5	j	NONHSAG032560.2	NONHSAT081498.2	j	MIR155HG	ENST00000456917.1	j	yes
MN297724	LHRI_LNC541.1	LHRI_LNC541	2	150485591	150485791	-	2:150485591-150485791:-	RND3	NA	NA	NA	Promoter,	1	201	-	-	u	NONHSAG029514.1	NONHSAT074904.1	i	-	-	u
MN298690	LHRI_LNC1630.1	LHRI_LNC1630	X	40105768	40106128	-	X:40105768-40106128:-	BCOR	NA	NA	NA	Promoter Flanking Region,	1	361	-	-	u	-	-	u	-	-	u		Yes
MN298511	LHRI_LNC1417.1	LHRI_LNC1417	8	77005868	77006108	+	8:77005868-77006108:+	NA	NA	M0,	NA	NA	1	241	lnc-ZFHX4-6	lnc-ZFHX4-6:12	c	NONHSAG050565.2	NONHSAT127350.2	c	-	-	u
MN298453	LHRI_LNC1345.1	LHRI_LNC1345	7	138216625	138277042	-	7:138216625-138277042:-	NA	NA	NA	NA	NA	2	245	-	-	u	NONHSAG096702.1	NONHSAT212763.1	x	-	-	u
MN297748	LHRI_LNC571.1	LHRI_LNC571	2	191611994	191612212	+	2:191611994-191612212:+	NA	NA	M2,	NA	Promoter Flanking Region,Open chromatin,	1	219	-	-	u	-	-	u	-	-	u		Yes
MN297927	LHRI_LNC752.1	LHRI_LNC752	22	44182187	44182775	-	22:44182187-44182775:-	PARVG	M1,	M2,M0,M1,	M1,M0,	Promoter,	1	589	lnc-SHISAL1-1	lnc-SHISAL1-1:1	p	NONHSAG034101.2	NONHSAT087141.2	x	AL031595.1	ENST00000623969.1	p	Yes?
MN297415	LHRI_LNC176.1	LHRI_LNC176	17	8965780	8966063	-	17:8965780-8966063:-	AC002091.2	M1,M0,	M1,M0,M2,	M1,M0,	Promoter,	1	284	lnc-NTN1-2	lnc-NTN1-2:7	x	NONHSAG020791.2	NONHSAT145573.2	x	AC002091.2	ENST00000585297.1	x	yes
MN297664	LHRI_LNC460.1	LHRI_LNC460	2	62275859	62276135	+	2:62275859-62276135:+	NA	NA	M2,M0,	NA	CTCF Binding Site,	1	277	lnc-CCT4-2	lnc-CCT4-2:1	i	NONHSAG078737.1	NONHSAT184724.1	x	-	-	u
MN298245	LHRI_LNC1130.12	LHRI_LNC1130	6	2271545	2318952	+	6:2271545-2318952:+	GMDS-DT	NA	M2,M1,M0,	NA	NA	2	1918	GMDS-DT	GMDS-DT:80	j	NONHSAG042638.2	NONHSAT106625.2	j	GMDS-DT	ENST00000456943.6	j	yes
MN297334	LHRI_LNC64.6	LHRI_LNC64	15	101961618	101976552	+	15:101961618-101976552:+	MIR6859-3	M0,M1,	M1,M0,M2,	M2,M1,M0,	Open chromatin,Promoter,	10	1931	lnc-OR4F15-4	lnc-OR4F15-4:5	j	NONHSAG018142.2	NONHSAT051712.2	j	-	-	u
MN298151	LHRI_LNC1011.1	LHRI_LNC1011	4	183467913	183468184	+	4:183467913-183468184:+	NA	NA	M0,M2,	NA	Enhancer,	1	272	lnc-RWDD4-2	lnc-RWDD4-2:6	i	NONHSAG039461.2	NONHSAT099483.2	i	-	-	u
MN297535	LHRI_LNC292.1	LHRI_LNC292	18	35473145	35473362	-	18:35473145-35473362:-	INO80C	NA	M2,M1,M0,	NA	Open chromatin,	1	218	-	-	u	NONHSAG075103.1	NONHSAT178362.1	i	-	-	u
MK280402	LHRI_LNC778.1	LHRI_LNC778	3	15650986	15652138	+	3:15650986-15652138:+	NA	NA	NA	NA	Promoter Flanking Region,	1	1153	-	-	u	NONHSAG034533.1	NONHSAT088483.1	i	-	-	u
MN297968	LHRI_LNC790.1	LHRI_LNC790	3	38535992	38536215	+	3:38535992-38536215:+	EXOG	NA	M1,M0,M2,	NA	NA	1	224	-	-	u	NONHSAG034797.1	NONHSAT089075.1	p	-	-	u
MN296787	LHRI_LNC1707.1	LHRI_LNC1707	1	15153131	15153568	-	1:15153131-15153568:-	TMEM51	M1,M0,	M2,M0,M1,	M0,	Promoter,	1	438	TMEM51-AS1	TMEM51-AS1:6	c	-	-	u	TMEM51-AS1	ENST00000650369.1	o	yes
MN297813	LHRI_LNC656.2	LHRI_LNC656	20	40693395	40889436	-	20:40693395-40889436:-	AL035665.1,RNA5SP484,NA	NA	NA	NA	Promoter Flanking Region,	7	2260	lnc-MAFB-1	lnc-MAFB-1:1	j	NONHSAG031780.2	NONHSAT079742.2	j	AL035665.1	ENST00000428495.2	y	yes
MN297630	LHRI_LNC425.1	LHRI_LNC425	2	26000431	26000678	-	2:26000431-26000678:-	NA	NA	NA	M1,M0,	Promoter Flanking Region,Enhancer,	1	248	-	-	u	-	-	u	-	-	u		Yes
MN298038	LHRI_LNC866.1	LHRI_LNC866	3	136951762	136952243	+	3:136951762-136952243:+	IL20RB	NA	M2,M0,M1,	NA	Open chromatin,	1	482	IL20RB-AS1	IL20RB-AS1:2	i	NONHSAG036177.2	NONHSAT092295.2	i	-	-	u
MN297913	LHRI_LNC729.1	LHRI_LNC729	22	30423607	30423931	-	22:30423607-30423931:-	AC004832.3	M1,M0,	M2,	M1,M0,	Promoter,	1	325	-	-	u	NONHSAG033653.1	NONHSAT084745.1	i	-	-	u
MN298081	LHRI_LNC924.1	LHRI_LNC924	4	765946	766157	-	4:765946-766157:-	PCGF3	NA	M2,M1,M0,	NA	Open chromatin,	1	212	lnc-CPLX1-2	lnc-CPLX1-2:9	i	NONHSAG037225.1	NONHSAT094616.1	c	AC139887.2	ENST00000503571.5	i	yes
MN298203	LHRI_LNC1073.1	LHRI_LNC1073	5	96150423	96150681	+	5:96150423-96150681:+	AC104123.1	NA	NA	M0,	Open chromatin,	1	259	MIR583HG	MIR583HG:36	i	NONHSAG041089.1	NONHSAT102912.1	x	AC104123.1	ENST00000502645.2	i	yes
MN298550	LHRI_LNC1463.1	LHRI_LNC1463	8	144078002	144082514	-	8:144078002-144082514:-	AC109322.1	M1,M0,	M2,M1,M0,	NA	Promoter,	2	1626	lnc-OPLAH-1	lnc-OPLAH-1:6	k	NONHSAG051532.2	NONHSAT129692.2	o	AC109322.1	ENST00000524499.1	o	yes
MN297417	LHRI_LNC177.1	LHRI_LNC177	17	16535871	16536152	+	17:16535871-16536152:+	NA	M1,	NA	M0,	Promoter Flanking Region,CTCF Binding Site,	1	282	lnc-TRPV2-4	lnc-TRPV2-4:6	o	NONHSAG020960.2	NONHSAT145977.2	x	-	-	u
MK280085	LHRI_LNC1898.1	LHRI_LNC1898	12	630840	645415	+	12:630840-645415:+	AC021054.1	NA	NA	M0,	Promoter,	4	1837	lnc-B4GALNT3-2	lnc-B4GALNT3-2:7	j	NONHSAG010146.2	NONHSAT025356.2	j	AC021054.1	ENST00000537514.1	j	yes
MN297569	LHRI_LNC333.1	LHRI_LNC333	19	16622160	16622647	-	19:16622160-16622647:-	AC008764.2	NA	M2,M0,M1,	NA	Open chromatin,	1	488	lnc-OR7C2-1	lnc-OR7C2-1:1	x	NONHSAG024979.2	NONHSAT179488.1	i	AC008764.2	ENST00000597226.1	i	yes
MN298366	LHRI_LNC1242.1	LHRI_LNC1242	6	170376753	170377411	+	6:170376753-170377411:+	FAM120B	NA	M1,M0,M2,	NA	NA	2	415	-	-	u	NONHSAG045514.2	NONHSAT116273.2	i	-	-	u
MN296976	LHRI_LNC1728.2	LHRI_LNC1728	10	45717470	45727161	-	10:45717470-45727161:-	FAM21FP	M0,M1,	M0,M2,	M0,	Promoter,	7	893	lnc-ZFAND4-2	lnc-ZFAND4-2:1	j	NONHSAG005775.2	NONHSAT013112.2	j	-	-	u
MN298725	LHRI_LNC1688.6	LHRI_LNC1688	Y	3002998	3034211	+	Y:3002998-3034211:+	LINC00278	NA	NA	NA	NA	2	257	LINC00278	LINC00278:3	j	NONHSAG055665.2	NONHSAT139305.2	j	LINC00278	ENST00000425031.1	j	yes
MK279951	LHRI_LNC109.7	LHRI_LNC109	1	58882874	59029995	-	1:58882874-59029995:-	AC105277.1	NA	NA	NA	Enhancer,	8	1708	lnc-JUN-2	lnc-JUN-2:12	j	NONHSAG001627.2	NONHSAT003536.2	j	AC105277.1	ENST00000635492.1	j	yes
MN296982	LHRI_LNC1738.2	LHRI_LNC1738	10	69924876	69957243	-	10:69924876-69957243:-	COL13A1	NA	NA	M0,	Promoter Flanking Region,CTCF Binding Site,	2	3106	-	-	u	NONHSAG006126.2	NONHSAT155620.1	x	-	-	u
MN298279	LHRI_LNC1147.1	LHRI_LNC1147	6	26956687	26956905	-	6:26956687-26956905:-	NA	M1,	NA	NA	Promoter,	1	219	-	-	u	NONHSAG043262.1	NONHSAT108319.1	i	-	-	u
MN298106	LHRI_LNC950.3	LHRI_LNC950	4	38744140	38752870	+	4:38744140-38752870:+	NA	NA	NA	M0,	CTCF Binding Site,Promoter Flanking Region,	6	1997	lnc-KLF3-2	lnc-KLF3-2:1	j	NONHSAG037769.2	NONHSAT096054.2	j	-	-	u
MN298572	LHRI_LNC1486.1	LHRI_LNC1486	9	32446477	32446688	-	9:32446477-32446688:-	ACO1	NA	M1,M0,M2,	NA	NA	1	212	-	-	u	-	-	u	-	-	u		Yes
MN297711	LHRI_LNC522.9	LHRI_LNC522	2	113621767	113627090	-	2:113621767-113627090:-	AL078621.3,RPL23AP7	M0,M1,	M1,M0,M2,	NA	Promoter,	3	777	lnc-SLC35F5-14	lnc-SLC35F5-14:5	j	NONHSAG029024.2	NONHSAT073816.2	j	-	-	u
MN298354	LHRI_LNC1231.1	LHRI_LNC1231	6	158766326	158768319	+	6:158766326-158768319:+	EZR	NA	M0,M1,M2,	NA	NA	1	1994	-	-	u	NONHSAG093761.1	NONHSAT208321.1	p	-	-	u
MN297900	LHRI_LNC711.1	LHRI_LNC711	22	12628294	12628540	+	22:12628294-12628540:+	FRG1GP	NA	M2,M0,M1,	NA	CTCF Binding Site,	1	247	-	-	u	-	-	u	-	-	u		Yes
MN297722	LHRI_LNC537.1	LHRI_LNC537	2	144660698	144661120	-	2:144660698-144661120:-	NA	NA	NA	M1,M0,	Promoter Flanking Region,Enhancer,	1	423	lnc-ZEB2-23	lnc-ZEB2-23:1	o	-	-	u	-	-	u
MN298216	LHRI_LNC1088.1	LHRI_LNC1088	5	135331282	135331489	-	5:135331282-135331489:-	C5orf66	NA	M2,M1,M0,	NA	Open chromatin,	1	208	lnc-CATSPER3-2	lnc-CATSPER3-2:7	i	NONHSAG041600.2	NONHSAT203247.1	i	C5orf66	ENST00000624272.3	i	yes
MN297615	LHRI_LNC398.1	LHRI_LNC398	19	54374230	54376066	-	19:54374230-54376066:-	NA	NA	M0,	M0,	Promoter Flanking Region,	1	1837	-	-	u	NONHSAG076248.1	NONHSAT179946.1	x	-	-	u
MN297889	LHRI_LNC697.1	LHRI_LNC697	21	33977951	33978334	+	21:33977951-33978334:+	LINC00649	NA	NA	M1,M0,	Promoter Flanking Region,Open chromatin,	1	384	LINC00649	LINC00649:13	c	NONHSAG032726.2	NONHSAT081844.2	c	LINC00649	ENST00000427447.5	p	yes
MN297726	LHRI_LNC547.1	LHRI_LNC547	2	151793349	151793830	-	2:151793349-151793830:-	ARL5A	NA	M2,M0,M1,	NA	NA	1	482	lnc-RIF1-2	lnc-RIF1-2:1	i	NONHSAG029550.2	NONHSAT074963.2	i	-	-	u
MN297903	LHRI_LNC715.1	LHRI_LNC715	22	20322956	20323251	+	22:20322956-20323251:+	AC007663.3	M0,M1,	M0,	NA	Enhancer,Promoter,CTCF Binding Site,	1	296	lnc-ZNF74-7	lnc-ZNF74-7:2	i	NONHSAG083589.1	NONHSAT192029.1	p	AC007663.3	ENST00000609632.1	p	yes
MN297917	LHRI_LNC735.1	LHRI_LNC735	22	31777450	31777731	+	22:31777450-31777731:+	DEPDC5	NA	M0,M1,M2,	NA	NA	1	282	-	-	u	-	-	u	-	-	u		Yes
MN297133	LHRI_LNC1921.1	LHRI_LNC1921	12	11013757	11014042	-	12:11013757-11014042:-	AC018630.2	NA	M0,M1,M2,	NA	NA	1	286	lnc-PRR4-1	lnc-PRR4-1:1	i	-	-	u	-	-	u
MN296916	LHRI_LNC1252.1	LHRI_LNC1252	1	204624089	204624403	+	1:204624089-204624403:+	LRRN2	NA	NA	NA	CTCF Binding Site,TF binding site,	1	315	lnc-PIK3C2B-1	lnc-PIK3C2B-1:1	i	NONHSAG004035.1	NONHSAT008959.1	x	-	-	u
MN297083	LHRI_LNC1856.3	LHRI_LNC1856	11	69047367	69049737	-	11:69047367-69049737:-	TPCN2	M0,M1,	M2,M0,M1,	M1,M0,	Promoter,	2	1418	-	-	u	NONHSAG062915.1	NONHSAT159324.1	x	-	-	u
MN297469	LHRI_LNC217.25	LHRI_LNC217	17	43245374	43252005	-	17:43245374-43252005:-	RF00004	NA	NA	M2,M1,M0,	Promoter,	2	477	lnc-LINC00854-1	lnc-LINC00854-1:21	i	NONHSAG021878.2	NONHSAT053835.2	i	-	-	u
MN297789	LHRI_LNC625.1	LHRI_LNC625	20	10621857	10622146	+	20:10621857-10622146:+	SLX4IP	NA	M2,M0,M1,	NA	Promoter Flanking Region,	1	290	-	-	u	-	-	u	-	-	u		Yes
MN298563	LHRI_LNC1471.1	LHRI_LNC1471	9	6681874	6682278	+	9:6681874-6682278:+	NA	M0,M1,	M1,	M1,M0,	Promoter Flanking Region,	1	405	lnc-KDM4C-5	lnc-KDM4C-5:5	c	-	-	u	-	-	u
MN298023	LHRI_LNC848.1	LHRI_LNC848	3	114795402	114795674	-	3:114795402-114795674:-	ZBTB20	NA	NA	NA	NA	1	273	lnc-ZNF80-4	lnc-ZNF80-4:3	i	NONHSAG035787.1	NONHSAT091282.1	i	-	-	u
MN297025	LHRI_LNC1798.1	LHRI_LNC1798	11	2898328	2898591	-	11:2898328-2898591:-	SLC22A18AS	NA	NA	M0,	Promoter Flanking Region,	1	264	-	-	u	-	-	u	-	-	u		Yes
MN298379	LHRI_LNC1261.1	LHRI_LNC1261	7	6412488	6412799	+	7:6412488-6412799:+	DAGLB	NA	M2,M0,M1,	NA	NA	1	312	-	-	u	-	-	u	-	-	u		Yes
MN297554	LHRI_LNC316.1	LHRI_LNC316	19	4975094	4975368	+	19:4975094-4975368:+	KDM4B	NA	M2,M0,M1,	NA	Promoter Flanking Region,	1	275	-	-	u	-	-	u	-	-	u		Yes
MN298615	LHRI_LNC1523.13	LHRI_LNC1523	9	72269916	72291846	-	9:72269916-72291846:-	GDA,AL135924.1,NA	NA	M2,M0,	M0,	Promoter Flanking Region,CTCF Binding Site,	3	6361	lnc-GDA-3	lnc-GDA-3:1	x	NONHSAG052553.2	NONHSAT131854.2	x	-	-	u
MN297581	LHRI_LNC348.2	LHRI_LNC348	19	27715367	27793916	-	19:27715367-27793916:-	LINC00662	M1,M0,	M1,M0,M2,	M0,	Promoter,	5	1525	LINC00662	LINC00662:47	j	NONHSAG025376.2	NONHSAT063969.2	j	LINC00662	ENST00000590677.5	j	Yes?
MN297006	LHRI_LNC1777.1	LHRI_LNC1777	10	102449817	102456292	+	10:102449817-102456292:+	RPARP-AS1	M1,M0,	M2,	M0,	Promoter,	5	1561	RPARP-AS1	RPARP-AS1:5	j	NONHSAG006756.2	NONHSAT016119.2	j	RPARP-AS1	ENST00000492465.2	j	yes
MN296958	LHRI_LNC1703.1	LHRI_LNC1703	10	20298742	20299029	+	10:20298742-20299029:+	NA	NA	M2,	NA	CTCF Binding Site,Open chromatin,	1	288	-	-	u	-	-	u	-	-	u		Yes
MK280012	LHRI_LNC1733.1	LHRI_LNC1733	10	48651906	48660698	+	10:48651906-48660698:+	ARHGAP22,NA	NA	M2,M1,M0,	NA	Promoter Flanking Region,Open chromatin,CTCF Binding Site,	3	2947	lnc-WDFY4-8	lnc-WDFY4-8:1	j	NONHSAG005830.1	NONHSAT013230.1	x	-	-	u
MN298050	LHRI_LNC882.1	LHRI_LNC882	3	156715585	156715799	+	3:156715585-156715799:+	NA	NA	M2,M0,M1,	NA	NA	1	215	-	-	u	-	-	u	-	-	u		Yes
MN296934	LHRI_LNC1398.1	LHRI_LNC1398	1	223705973	223706174	-	1:223705973-223706174:-	CAPN2	NA	NA	NA	Promoter Flanking Region,	1	202	-	-	u	-	-	u	-	-	u		Yes
MN297332	LHRI_LNC63.1	LHRI_LNC63	15	99726538	99726782	-	15:99726538-99726782:-	LYSMD4	NA	M2,M0,M1,	NA	NA	1	245	lnc-LYSMD4-1	lnc-LYSMD4-1:3	i	-	-	u	-	-	u
MN298508	LHRI_LNC1413.1	LHRI_LNC1413	8	72104089	72104427	+	8:72104089-72104427:+	MSC-AS1	NA	M2,	NA	Open chromatin,	1	339	lnc-KCNB2-5	lnc-KCNB2-5:2	i	NONHSAG050493.2	NONHSAT127203.2	i	MSC-AS1	ENST00000518916.5	i	yes
MN298545	LHRI_LNC1456.1	LHRI_LNC1456	8	143302113	143303023	-	8:143302113-143303023:-	NA	NA	M2,	NA	NA	2	316	-	-	u	-	-	u	-	-	u		Yes
MN298124	LHRI_LNC977.1	LHRI_LNC977	4	118617104	118617334	+	4:118617104-118617334:+	AC110079.1	NA	M2,M0,M1,	NA	NA	1	231	lnc-METTL14-3	lnc-METTL14-3:1	i	NONHSAG038732.2	NONHSAT198995.1	i	-	-	u
MN297524	LHRI_LNC283.5	LHRI_LNC283	18	5238100	5290256	+	18:5238100-5290256:+	LINC00667	M1,M0,	M1,	M0,	Promoter,	3	1312	LINC00667	LINC00667:3	j	NONHSAG023258.2	NONHSAT057058.2	j	LINC00667	ENST00000577439.2	j	yes
MN298501	LHRI_LNC1403.1	LHRI_LNC1403	8	65732065	65732293	+	8:65732065-65732293:+	PDE7A	NA	M0,M1,M2,	NA	Open chromatin,	1	229	lnc-PDE7A-4	lnc-PDE7A-4:5	i	NONHSAG050388.1	NONHSAT126972.1	p	-	-	u
MN297126	LHRI_LNC1912.2	LHRI_LNC1912	12	8232228	8235736	-	12:8232228-8235736:-	FAM86FP	NA	M0,M1,M2,	NA	Enhancer,Open chromatin,	3	666	lnc-FAM90A1-1	lnc-FAM90A1-1:1	j	NONHSAG010402.2	NONHSAT026310.2	j	LINC02449	ENST00000304751.9	x	yes
MN297380	LHRI_LNC135.1	LHRI_LNC135	16	70804154	70804369	-	16:70804154-70804369:-	NA	NA	NA	M0,M1,	CTCF Binding Site,Promoter Flanking Region,	1	216	lnc-VAC14-1	lnc-VAC14-1:2	e	NONHSAG019874.2	NONHSAT143450.2	e	-	-	u
MN298510	LHRI_LNC1415.1	LHRI_LNC1415	8	72128668	72128965	+	8:72128668-72128965:+	NA	NA	NA	NA	NA	1	298	lnc-KCNB2-5	lnc-KCNB2-5:2	i	NONHSAG098902.1	NONHSAT215956.1	i	-	-	u
MN297830	LHRI_LNC661.1	LHRI_LNC661	20	49769288	49775381	-	20:49769288-49775381:-	NA	NA	M2,M1,	NA	Promoter Flanking Region,	4	435	lnc-B4GALT5-2	lnc-B4GALT5-2:3	j	-	-	u	-	-	u
MN297838	LHRI_LNC672.1	LHRI_LNC672	20	62812559	62812765	-	20:62812559-62812765:-	OGFR	NA	M1,M0,M2,	NA	Promoter Flanking Region,	1	207	lnc-TCFL5-6	lnc-TCFL5-6:1	c	NONHSAG032255.2	NONHSAT080793.2	c	-	-	u
MK280072	LHRI_LNC1869.1	LHRI_LNC1869	11	78805307	78844847	+	11:78805307-78844847:+	TENM4	NA	NA	M0,	Open chromatin,	2	363	-	-	u	NONHSAG009191.1	NONHSAT023305.1	y	-	-	u
MN297389	LHRI_LNC144.1	LHRI_LNC144	16	73069059	73069299	+	16:73069059-73069299:+	ZFHX3	NA	NA	M1,M0,	Promoter Flanking Region,	1	241	-	-	u	-	-	u	-	-	u		Yes
MN297545	LHRI_LNC303.1	LHRI_LNC303	18	79398719	79399247	-	18:79398719-79399247:-	NFATC1	M0,M1,	M2,M0,M1,	NA	Promoter Flanking Region,Promoter,	1	529	lnc-PQLC1-16	lnc-PQLC1-16:3	i	-	-	u	-	-	u
MN297491	LHRI_LNC244.1	LHRI_LNC244	17	58337548	58338136	-	17:58337548-58338136:-	TSPOAP1-AS1	M0,	NA	M0,M1,	NA	1	589	TSPOAP1-AS1	TSPOAP1-AS1:39	x	NONHSAG022327.2	NONHSAT054942.2	i	TSPOAP1-AS1	ENST00000579527.5	x	yes
MN298574	LHRI_LNC1488.1	LHRI_LNC1488	9	34921357	34921643	-	9:34921357-34921643:-	YWHAZP6	NA	M2,M1,M0,	NA	NA	1	287	-	-	u	-	-	u	-	-	u		Yes
MK280439	LHRI_LNC937.1	LHRI_LNC937	4	7650783	7654144	-	4:7650783-7654144:-	SORCS2	NA	NA	M0,	Promoter Flanking Region,	2	1437	-	-	u	NONHSAG037417.2	NONHSAT095053.2	x	-	-	u
MK280650	LHRI_LNC1633.1	LHRI_LNC1633	X	45743395	45770269	-	X:45743395-45770269:-	MIR222HG,MIR221	NA	M2,	NA	Promoter,	3	3020	lnc-CXorf36-46	lnc-CXorf36-46:4	j	NONHSAG054345.2	NONHSAT136803.2	j	MIR222HG	ENST00000602507.1	j	yes
MN296933	LHRI_LNC1393.1	LHRI_LNC1393	1	223105479	223106277	-	1:223105479-223106277:-	NA	NA	NA	NA	NA	1	799	-	-	u	NONHSAG004393.1	NONHSAT009711.1	i	-	-	u
MN297513	LHRI_LNC271.1	LHRI_LNC271	17	80196390	80196589	-	17:80196390-80196589:-	CARD14	NA	M1,M0,M2,	NA	CTCF Binding Site,TF binding site,Open chromatin,	1	200	-	-	u	NONHSAG023079.1	NONHSAT056660.1	p	-	-	u
MK279972	LHRI_LNC587.10	LHRI_LNC587	1	149273988	149285820	-	1:149273988-149285820:-	AC245297.1	M1,M0,	M2,M0,	M0,	Promoter Flanking Region,	2	1302	-	-	u	NONHSAG002804.1	NONHSAT006185.1	x	-	-	u
MN297361	LHRI_LNC100.8	LHRI_LNC100	16	27247280	27253968	+	16:27247280-27253968:+	AC106739.1,NSMCE1	NA	M1,M2,	NA	Promoter Flanking Region,	3	702	lnc-GTF3C1-4	lnc-GTF3C1-4:3	i	NONHSAG018961.1	NONHSAT141435.1	x	-	-	u
MK280006	LHRI_LNC1710.13	LHRI_LNC1710	10	29409618	29427706	+	10:29409618-29427706:+	SVIL-AS1	M0,M1,	NA	NA	CTCF Binding Site,Promoter,	5	5569	lnc-LYZL1-15	lnc-LYZL1-15:15	j	NONHSAG005499.2	NONHSAT012523.2	j	-	-	u
MN296810	LHRI_LNC84.1	LHRI_LNC84	1	54176617	54177089	-	1:54176617-54177089:-	AL357673.1	NA	M2,M0,M1,	NA	NA	1	473	-	-	u	-	-	u	-	-	u		Yes
MK280492	LHRI_LNC1163.1	LHRI_LNC1163	6	31588051	31588274	-	6:31588051-31588274:-	LST1	M0,M1,	M1,M0,M2,	M1,M0,	Promoter Flanking Region,CTCF Binding Site,	1	224	-	-	u	NONHSAG043495.2	NONHSAT207108.1	i	-	-	u
MK280602	LHRI_LNC1444.2	LHRI_LNC1444	8	128799894	128966001	-	8:128799894-128966001:-	CCDC26	NA	M2,	NA	NA	6	576	lnc-GSDMC-34	lnc-GSDMC-34:35	j	NONHSAG051268.2	NONHSAT217642.1	j	CCDC26	ENST00000630386.2	j	yes
MN298488	LHRI_LNC1385.1	LHRI_LNC1385	8	26453031	26453302	+	8:26453031-26453302:+	BNIP3L	NA	M2,	NA	Promoter Flanking Region,	1	272	lnc-DPYSL2-1	lnc-DPYSL2-1:2	p	NONHSAG049807.2	NONHSAT125654.2	p	-	-	u
MN297082	LHRI_LNC1856.2	LHRI_LNC1856	11	69047191	69049702	-	11:69047191-69049702:-	TPCN2	M0,M1,	M1,M0,M2,	M0,M1,	Promoter,	2	1707	-	-	u	NONHSAG062915.1	NONHSAT159324.1	x	-	-	u
MN297710	LHRI_LNC522.8	LHRI_LNC522	2	113621767	113627090	-	2:113621767-113627090:-	AL078621.3,RPL23AP7	M1,M0,	M2,M1,M0,	NA	Promoter,	3	726	lnc-SLC35F5-14	lnc-SLC35F5-14:5	j	NONHSAG029024.2	NONHSAT073816.2	j	-	-	u
MN298060	LHRI_LNC897.1	LHRI_LNC897	3	178955559	178956298	-	3:178955559-178956298:-	NA	NA	NA	NA	NA	1	740	lnc-KCNMB2-9	lnc-KCNMB2-9:1	x	NONHSAG036738.2	NONHSAT196610.1	c	-	-	u
MN298163	LHRI_LNC1023.1	LHRI_LNC1023	5	14184765	14184976	+	5:14184765-14184976:+	TRIO	NA	M2,	NA	Promoter Flanking Region,	1	212	-	-	u	-	-	u	-	-	u		Yes
MN297729	LHRI_LNC546.1	LHRI_LNC546	2	158848248	158848475	+	2:158848248-158848475:+	DAPL1	NA	NA	NA	CTCF Binding Site,Open chromatin,	1	228	-	-	u	-	-	u	-	-	u		Yes
MK280639	LHRI_LNC1569.8	LHRI_LNC1569	9	129489107	129513683	+	9:129489107-129513683:+	LINC00963	M0,M1,	M2,M1,M0,	M0,M1,	Promoter,	6	1422	LINC00963	LINC00963:54	j	NONHSAG053586.2	NONHSAT135075.2	j	LINC00963	ENST00000423918.5	j	yes
MN297775	LHRI_LNC608.1	LHRI_LNC608	2	237783256	237783484	+	2:237783256-237783484:+	LRRFIP1	NA	M0,M1,M2,	NA	NA	1	229	-	-	u	-	-	u	-	-	u		Yes
MK280214	LHRI_LNC169.12	LHRI_LNC169	17	6999399	7012342	-	17:6999399-7012342:-	ALOX12-AS1	M0,M1,	M2,M0,M1,	M1,M0,	Promoter,	4	571	lnc-SLC16A11-7	lnc-SLC16A11-7:2	c	NONHSAG020671.2	NONHSAT175889.1	j	ALOX12-AS1	ENST00000574377.5	j	yes
MN297877	LHRI_LNC683.4	LHRI_LNC683	21	14728344	14744594	-	21:14728344-14744594:-	NA	NA	M2,	NA	NA	3	1279	lnc-SAMSN1-1	lnc-SAMSN1-1:3	j	NONHSAG032395.2	NONHSAT081169.2	j	-	-	u
MN297635	LHRI_LNC431.1	LHRI_LNC431	2	31829206	31829608	-	2:31829206-31829608:-	NA	NA	NA	NA	Open chromatin,CTCF Binding Site,	1	403	-	-	u	NONHSAG027404.1	NONHSAT069943.1	i	-	-	u
MN297348	LHRI_LNC82.1	LHRI_LNC82	16	4618394	4618637	+	16:4618394-4618637:+	MGRN1	NA	M0,M2,	M0,M1,	Promoter,	1	244	lnc-MGRN1-1	lnc-MGRN1-1:1	p	-	-	u	-	-	u
MN297821	LHRI_LNC656.14	LHRI_LNC656	20	40696499	40889432	-	20:40696499-40889432:-	AL035665.1,RNA5SP484,NA	NA	NA	NA	Promoter Flanking Region,	7	2477	lnc-MAFB-1	lnc-MAFB-1:1	j	NONHSAG031780.2	NONHSAT079742.2	j	AL035665.1	ENST00000428495.2	j	yes
MN298189	LHRI_LNC1050.2	LHRI_LNC1050	5	66350115	66440479	-	5:66350115-66440479:-	NA	NA	M1,	NA	Open chromatin,Promoter Flanking Region,	3	1615	lnc-SGTB-4	lnc-SGTB-4:7	j	NONHSAG040547.2	NONHSAT101789.2	j	-	-	u
MN298030	LHRI_LNC855.2	LHRI_LNC855	3	129361105	129365453	-	3:129361105-129365453:-	NA	NA	M1,M0,M2,	NA	CTCF Binding Site,Open chromatin,	2	3669	-	-	u	-	-	u	-	-	u		Yes
MN297175	LHRI_LNC1977.1	LHRI_LNC1977	12	89353778	89354005	-	12:89353778-89354005:-	NA	M0,M1,	NA	M0,M1,	Promoter,	1	228	lnc-TMTC3-13	lnc-TMTC3-13:7	x	NONHSAG011864.2	NONHSAT029808.2	x	-	-	u
MN298255	LHRI_LNC1138.12	LHRI_LNC1138	6	6697584	6801197	-	6:6697584-6801197:-	AL031123.1,BTF3P7	NA	M2,	M1,M0,	Enhancer,Promoter Flanking Region,	5	4225	lnc-F13A1-3	lnc-F13A1-3:22	j	NONHSAG042935.2	NONHSAT107561.2	j	AL031123.1	ENST00000648205.1	j	yes
MN296818	LHRI_LNC134.1	LHRI_LNC134	1	65024295	65024646	-	1:65024295-65024646:-	NA	NA	M2,	NA	TF binding site,	1	352	lnc-AK4-1	lnc-AK4-1:1	i	NONHSAG056517.1	NONHSAT149098.1	i	-	-	u
MN298319	LHRI_LNC1203.1	LHRI_LNC1203	6	108687364	108687698	+	6:108687364-108687698:+	NA	NA	M1,M0,M2,	NA	Enhancer,Open chromatin,	1	335	lnc-SESN1-3	lnc-SESN1-3:1	x	NONHSAG044554.2	NONHSAT114358.2	x	-	-	u
MN298166	LHRI_LNC1027.1	LHRI_LNC1027	5	36665553	36665790	-	5:36665553-36665790:-	SLC1A3	NA	M1,M0,M2,	NA	TF binding site,	1	238	lnc-RANBP3L-4	lnc-RANBP3L-4:2	p	NONHSAG040192.1	NONHSAT101038.1	i	AC008957.1	ENST00000512329.1	p	Yes?
MN297745	LHRI_LNC568.1	LHRI_LNC568	2	191020548	191021052	+	2:191020548-191021052:+	STAT1	NA	NA	M1,M0,	Promoter,Promoter Flanking Region,	1	505	lnc-GLS-2	lnc-GLS-2:4	c	NONHSAG030109.2	NONHSAT183312.1	e	AC067945.2	ENST00000431351.1	p	yes
MN297922	LHRI_LNC743.1	LHRI_LNC743	22	39489115	39490153	-	22:39489115-39490153:-	MGAT3	NA	M2,	NA	Promoter Flanking Region,	1	1039	-	-	u	-	-	u	-	-	u		Yes
MN298699	LHRI_LNC1650.3	LHRI_LNC1650	X	73944324	74010092	+	X:73944324-74010092:+	RF02124	M0,	M2,M0,	NA	Promoter Flanking Region,Promoter,	6	7786	JPX	JPX:11	j	NONHSAG054784.2	NONHSAT137571.2	j	JPX	ENST00000639185.1	j	yes
MN297001	LHRI_LNC1764.1	LHRI_LNC1764	10	92131706	92131952	-	10:92131706-92131952:-	CPEB3	NA	NA	NA	NA	1	247	-	-	u	-	-	u	-	-	u		Yes
MN297112	LHRI_LNC1895.1	LHRI_LNC1895	11	129859745	129860314	-	11:129859745-129860314:-	TMEM45B	NA	M2,M0,M1,	NA	Promoter Flanking Region,	1	570	lnc-NFRKB-4	lnc-NFRKB-4:1	e	-	-	u	-	-	u
MN298466	LHRI_LNC1364.8	LHRI_LNC1364	7	150778569	150781122	-	7:150778569-150781122:-	NA	NA	NA	M0,M1,	CTCF Binding Site,Promoter Flanking Region,Enhancer,	3	705	lnc-TMEM176B-1	lnc-TMEM176B-1:1	j	NONHSAG049146.2	NONHSAT124156.2	j	-	-	u
MN298186	LHRI_LNC1047.1	LHRI_LNC1047	5	59985726	59985927	-	5:59985726-59985927:-	PDE4D	NA	M0,	NA	NA	1	202	lnc-DEPDC1B-5	lnc-DEPDC1B-5:1	i	-	-	u	-	-	u
MN297455	LHRI_LNC217.7	LHRI_LNC217	17	43233693	43241370	-	17:43233693-43241370:-	RF00004	M0,M1,M2,	NA	M0,M2,M1,	Promoter,	2	285	lnc-LINC00854-1	lnc-LINC00854-1:21	i	NONHSAG021967.1	NONHSAT054022.1	o	-	-	u
MN296839	LHRI_LNC343.1	LHRI_LNC343	1	110508100	110570759	+	1:110508100-110570759:+	KCNA2,KCNA3	NA	M0,M2,	M0,M1,	Promoter Flanking Region,	4	1319	lnc-PROK1-4	lnc-PROK1-4:3	j	NONHSAG058027.1	NONHSAT152080.1	x	-	-	u
MN297486	LHRI_LNC231.1	LHRI_LNC231	17	47044918	47045167	-	17:47044918-47045167:-	LRRC37A17P	NA	M0,M1,M2,	NA	NA	1	250	lnc-RPRML-3	lnc-RPRML-3:20	i	NONHSAG022029.2	NONHSAT054231.2	x	AC068152.1	ENST00000571901.5	i	yes
MN296878	LHRI_LNC710.1	LHRI_LNC710	1	152472264	152472529	-	1:152472264-152472529:-	NA	NA	M1,M2,	NA	CTCF Binding Site,	1	266	-	-	u	-	-	u	-	-	u		Yes
MN297212	LHRI_LNC2025.1	LHRI_LNC2025	13	51451973	51452264	+	13:51451973-51452264:+	INTS6	M1,M0,	M2,M1,M0,	M0,M1,M2,	Promoter,	1	292	lnc-C13orf42-4	lnc-C13orf42-4:2	x	NONHSAG013535.1	NONHSAT033869.1	i	-	-	u
MN297307	LHRI_LNC2131.6	LHRI_LNC2131	15	67514962	67521632	-	15:67514962-67521632:-	IQCH-AS1	M1,M0,	M2,	M0,M1,	Promoter,	3	295	IQCH-AS1	IQCH-AS1:16	j	NONHSAG017245.2	NONHSAT046853.2	j	IQCH-AS1	ENST00000559298.5	j	yes
MN296904	LHRI_LNC1174.1	LHRI_LNC1174	1	198917843	198918157	-	1:198917843-198918157:-	MIR181A1HG	NA	M2,M1,	NA	Promoter Flanking Region,	1	315	lnc-ATP6V1G3-4	lnc-ATP6V1G3-4:4	i	NONHSAG003880.1	NONHSAT008654.1	i	MIR181A1HG	ENST00000432296.1	i	yes
MN297444	LHRI_LNC207.1	LHRI_LNC207	17	37971891	37972129	-	17:37971891-37972129:-	NA	NA	NA	NA	NA	1	239	-	-	u	-	-	u	-	-	u		Yes
MN297663	LHRI_LNC461.39	LHRI_LNC461	2	61185526	61191203	+	2:61185526-61191203:+	AHSA2P	NA	M1,M0,M2,	NA	NA	3	3440	lnc-C2orf74-1	lnc-C2orf74-1:2	j	NONHSAG027876.2	NONHSAT070941.2	c	-	-	u
MN298639	LHRI_LNC1545.1	LHRI_LNC1545	9	98256041	98256304	-	9:98256041-98256304:-	NA	M0,M1,	M0,M2,	M0,M1,	Promoter,	1	264	lnc-NANS-4	lnc-NANS-4:1	x	NONHSAG052931.1	NONHSAT133374.1	i	-	-	u
MN297943	LHRI_LNC772.2	LHRI_LNC772	3	11192096	11225937	-	3:11192096-11225937:-	HRH1	M1,M0,	M2,M1,M0,	M0,M1,	Enhancer,Promoter,Open chromatin,	6	4915	lnc-VGLL4-9	lnc-VGLL4-9:3	j	NONHSAG085340.1	NONHSAT195410.1	j	AC083855.2	ENST00000648436.1	j	yes
MN298558	LHRI_LNC1473.2	LHRI_LNC1473	9	5577033	5604937	-	9:5577033-5604937:-	AL162253.1,RIC1	NA	M2,	NA	NA	3	545	lnc-ERMP1-5	lnc-ERMP1-5:1	j	NONHSAG051718.2	NONHSAT130105.2	j	AL162253.1	ENST00000443792.1	x	yes
MK280193	LHRI_LNC100.2	LHRI_LNC100	16	27247263	27290492	+	16:27247263-27290492:+	AC106739.1,NSMCE1	NA	M1,M2,	NA	Promoter Flanking Region,	4	583	lnc-IL4R-2	lnc-IL4R-2:10	j	NONHSAG018962.2	NONHSAT172810.1	j	FLJ21408	ENST00000566854.5	j	yes
MK280316	LHRI_LNC538.1	LHRI_LNC538	2	144389196	144389721	+	2:144389196-144389721:+	ZEB2	NA	M0,M1,M2,	NA	Open chromatin,	1	526	lnc-ARHGAP15-17	lnc-ARHGAP15-17:1	i	-	-	u	-	-	u
MK279936	LHRI_LNC1744.1	LHRI_LNC1744	1	629099	630058	-	1:629099-630058:-	MTND2P28	NA	M1,M0,	NA	Open chromatin,TF binding site,	1	960	lnc-OR4F16-8	lnc-OR4F16-8:1	e	NONHSAG000032.2	NONHSAT000089.2	e	-	-	u
MK280064	LHRI_LNC1847.4	LHRI_LNC1847	11	65806950	65818189	-	11:65806950-65818189:-	NA	M1,M0,	M0,M1,M2,	M0,M1,	Promoter Flanking Region,CTCF Binding Site,	3	9387	lnc-CFL1-1	lnc-CFL1-1:8	k	NONHSAG008704.2	NONHSAT022221.2	k	-	-	u
MN297132	LHRI_LNC1920.1	LHRI_LNC1920	12	10852335	10852596	-	12:10852335-10852596:-	AC018630.2	NA	M2,	NA	NA	1	262	lnc-PRR4-1	lnc-PRR4-1:1	i	NONHSAG010490.1	NONHSAT026893.1	i	-	-	u
MN297880	LHRI_LNC685.3	LHRI_LNC685	21	25560520	25575881	+	21:25560520-25575881:+	MIR155	M1,	NA	M1,	Promoter Flanking Region,Promoter,Open chromatin,	5	2746	MIR155HG	MIR155HG:5	j	NONHSAG032560.2	NONHSAT081498.2	k	MIR155HG	ENST00000456917.1	k	yes
MN297906	LHRI_LNC721.1	LHRI_LNC721	22	24651233	24651494	+	22:24651233-24651494:+	AP000356.2	NA	NA	NA	CTCF Binding Site,Promoter Flanking Region,	1	262	lnc-LRRC75B-73	lnc-LRRC75B-73:1	i	NONHSAG033530.2	NONHSAT084368.2	i	AP000356.2	ENST00000639904.1	x	yes
MN298420	LHRI_LNC1305.1	LHRI_LNC1305	7	93585239	93585483	-	7:93585239-93585483:-	NA	NA	M2,M1,	NA	CTCF Binding Site,	1	245	-	-	u	NONHSAG048222.1	NONHSAT122017.1	c	-	-	u
MN297599	LHRI_LNC380.1	LHRI_LNC380	19	48392576	48392833	-	19:48392576-48392833:-	NA	M0,M1,	NA	NA	Promoter,Promoter Flanking Region,	1	258	lnc-KDELR1-2	lnc-KDELR1-2:1	c	-	-	u	-	-	u
MN297174	LHRI_LNC1976.3	LHRI_LNC1976	12	89012285	89052031	-	12:89012285-89052031:-	AC024909.1	NA	M2,	NA	Open chromatin,CTCF Binding Site,	6	1538	LINC02458	LINC02458:11	j	NONHSAG011861.2	NONHSAT029802.2	j	AC024909.1	ENST00000549278.1	j	Yes?
MN297281	LHRI_LNC2105.1	LHRI_LNC2105	15	30933321	30933609	+	15:30933321-30933609:+	FAN1	NA	M2,M0,M1,	NA	NA	1	289	-	-	u	NONHSAG016418.1	NONHSAT041377.1	i	-	-	u
MN297907	LHRI_LNC720.1	LHRI_LNC720	22	24783433	24783685	+	22:24783433-24783685:+	NA	NA	M2,M0,M1,	NA	NA	1	253	-	-	u	-	-	u	-	-	u		Yes
MN297925	LHRI_LNC748.1	LHRI_LNC748	22	42437930	42453302	+	22:42437930-42453302:+	AL022316.1	NA	M2,	NA	Promoter Flanking Region,Promoter,	8	1535	lnc-SERHL2-2	lnc-SERHL2-2:2	j	NONHSAG034056.2	NONHSAT087053.2	j	AL022316.1	ENST00000428765.1	j	yes
MN297814	LHRI_LNC656.3	LHRI_LNC656	20	40693395	40889436	-	20:40693395-40889436:-	AL035665.1,RNA5SP484,NA	NA	NA	NA	Promoter Flanking Region,	7	2257	lnc-MAFB-1	lnc-MAFB-1:1	j	NONHSAG031780.2	NONHSAT079742.2	j	AL035665.1	ENST00000428495.2	y	yes
MN296753	LHRI_LNC1588.1	LHRI_LNC1588	GL000221.1	79733	80012	-	GL000221.1:79733-80012:-	NA	NA	NA	NA	TF binding site,Promoter Flanking Region,CTCF Binding Site,	1	280	-	-	u	-	-	u	-	-	u		Yes
MN298476	LHRI_LNC1377.4	LHRI_LNC1377	8	12194963	12480930	+	8:12194963-12480930:+	AC145124.1,AC068587.4	M1,	M0,	NA	Promoter,	5	1259	lnc-ZNF705D-2	lnc-ZNF705D-2:39	j	NONHSAG049565.2	NONHSAT125127.2	j	AC145124.1	ENST00000528514.1	j	yes
MN297498	LHRI_LNC252.1	LHRI_LNC252	17	63613877	63614111	+	17:63613877-63614111:+	NA	NA	M2,M0,M1,	NA	Enhancer,CTCF Binding Site,	1	235	-	-	u	-	-	u	-	-	u		Yes
MN297579	LHRI_LNC353.1	LHRI_LNC353	19	24046411	24046764	+	19:24046411-24046764:+	AC092279.1	NA	M2,M1,M0,	NA	NA	1	354	lnc-ZNF726-1	lnc-ZNF726-1:4	i	NONHSAG025364.1	NONHSAT063938.1	x	AC092279.1	ENST00000597683.1	i	yes
MN298433	LHRI_LNC1324.1	LHRI_LNC1324	7	105712522	105712756	-	7:105712522-105712756:-	ATXN7L1	NA	M2,M1,	NA	CTCF Binding Site,Open chromatin,	1	235	-	-	u	-	-	u	-	-	u		Yes
MN298263	LHRI_LNC1138.20	LHRI_LNC1138	6	6697628	6801246	-	6:6697628-6801246:-	AL031123.1,BTF3P7	NA	M2,	M0,M1,	Enhancer,Promoter Flanking Region,	5	4308	lnc-F13A1-3	lnc-F13A1-3:22	j	NONHSAG042935.2	NONHSAT107561.2	j	AL031123.1	ENST00000648205.1	j	yes
MK280189	LHRI_LNC100.3	LHRI_LNC100	16	27247263	27258425	+	16:27247263-27258425:+	AC106739.1,NSMCE1	NA	M2,M1,	NA	Promoter Flanking Region,	2	1429	lnc-GTF3C1-4	lnc-GTF3C1-4:2	x	NONHSAG018961.1	NONHSAT141435.1	x	-	-	u
MN296813	LHRI_LNC109.10	LHRI_LNC109	1	58882885	59029977	-	1:58882885-59029977:-	AC105277.1	NA	NA	NA	Enhancer,	6	1522	lnc-JUN-2	lnc-JUN-2:12	j	NONHSAG001627.2	NONHSAT003536.2	j	AC105277.1	ENST00000635492.1	j	yes
MN298007	LHRI_LNC830.1	LHRI_LNC830	3	63917523	63917983	+	3:63917523-63917983:+	ATXN7	NA	M1,M0,M2,	NA	Open chromatin,	1	461	-	-	u	NONHSAG035318.2	NONHSAT193972.1	i	-	-	u
MK280459	LHRI_LNC1050.4	LHRI_LNC1050	5	66350156	66440440	-	5:66350156-66440440:-	NA	NA	M1,	NA	Promoter Flanking Region,Open chromatin,	3	1579	lnc-SGTB-4	lnc-SGTB-4:7	j	NONHSAG040547.2	NONHSAT101789.2	j	-	-	u
MN297764	LHRI_LNC589.1	LHRI_LNC589	2	215830889	215831206	-	2:215830889-215831206:-	LINC00607	NA	NA	NA	CTCF Binding Site,Enhancer,Promoter Flanking Region,	1	318	LINC00607	LINC00607:1	i	NONHSAG030459.2	NONHSAT076768.2	i	LINC00607	ENST00000445174.5	i	yes
MN296865	LHRI_LNC544.2	LHRI_LNC544	1	146387259	146388029	+	1:146387259-146388029:+	AC245407.1	NA	NA	NA	Promoter Flanking Region,	2	548	-	-	u	-	-	u	-	-	u		Yes
MK280208	LHRI_LNC159.2	LHRI_LNC159	16	90106461	90138322	+	16:90106461-90138322:+	FAM157C	NA	M1,	NA	Promoter,Promoter Flanking Region,CTCF Binding Site,	9	1775	FAM157C	FAM157C:10	j	NONHSAG020390.2	NONHSAT144643.2	j	FAM157C	ENST00000563357.1	j	yes
MN297885	LHRI_LNC691.1	LHRI_LNC691	21	29435739	29436027	+	21:29435739-29436027:+	BACH1	NA	M2,M1,M0,	NA	Promoter Flanking Region,	1	289	lnc-GRIK1-3	lnc-GRIK1-3:1	i	NONHSAG032627.2	NONHSAT081644.2	x	-	-	u
MN297940	LHRI_LNC768.24	LHRI_LNC768	3	9385836	9396624	-	3:9385836-9396624:-	THUMPD3-AS1	M1,M0,	M0,M1,M2,	M1,M0,	Promoter,	5	802	THUMPD3-AS1	THUMPD3-AS1:41	j	NONHSAG034363.2	NONHSAT087766.2	j	THUMPD3-AS1	ENST00000519043.5	j	yes
MK280328	LHRI_LNC585.2	LHRI_LNC585	2	207662375	207679381	+	2:207662375-207679381:+	LINC01857	NA	M2,	NA	Promoter Flanking Region,	5	1297	LINC01857	LINC01857:11	j	NONHSAG030374.2	NONHSAT076616.2	j	LINC01857	ENST00000429730.1	j	yes
MN298266	LHRI_LNC1134.1	LHRI_LNC1134	6	6856782	6857443	+	6:6856782-6857443:+	NA	NA	NA	M0,M1,	Promoter Flanking Region,	1	662	lnc-LY86-12	lnc-LY86-12:1	c	NONHSAG093932.1	NONHSAT208687.1	x	-	-	u
[truncated: 614 more rows]

## Sheet: class code
Priority	Code	Description
1	=	Complete match of intron chain
2	c	Contained
3	j	Potentially novel isoform (fragment): at least one splice junction is shared with a reference transcript
4	e	Single exon transfrag overlapping a reference exon and at least 10 bp of a reference intron, indicating a possible pre-mRNA fragment.
5	i	A transfrag falling entirely within a reference intron
6	o	Generic exonic overlap with a reference transcript
7	p	Possible polymerase run-on fragment (within 2Kbases of a reference transcript)
8	r	Repeat. Currently determined by looking at the soft-masked reference sequence and applied to transcripts where at least 50% of the bases are lower case
9	u	Unknown, intergenic transcript
10	x	Exonic overlap with reference on the opposite strand
11	s	An intron of the transfrag overlaps a reference intron on the opposite strand (likely due to read mapping errors)
12	.	(.tracking file only, indicates multiple classifications)
