# Supplementary material for: Profiles of Long Non-Coding RNAs and mRNA Expression in Human Macrophages Regulated by Interleukin-27
Source: MDPI journal article supplement (doi:10.3390/ijms20246207), 2019-12-09
Supplement: s1 [file s1 › Table S3.xlsx]

## Sheet: Sheet1
Table S3. Significant differentially expressed known lncRNA genes in IL-27 regulated Macrophages
Ensemble Name	Gene Name	IMAC			ABI
		log2FC	Average log2CPM	FDR	log2FC	Average log2CPM	FDR
ENSG00000223839.7	FAM95B1	-2.72683	5.82566	0.000568476	-3.85006	7.43198	4.27982e-46
ENSG00000174403.15	MIR1-1HG-AS1	-3.68587	2.32881	7.0503e-09	-4.42731	5.95863	7.1576e-36
ENSG00000250378.3	AC114296.1	-6.55152	3.00007	2.26299e-15	-5.04278	5.38561	1.48035e-35
ENSG00000223949.6	ROR1-AS1	-2.96099	7.02036	3.48606e-09	-2.68923	7.21799	4.52147e-31
ENSG00000269821.1	KCNQ1OT1	-1.01903	8.757	0.00802825	-1.17166	10.3431	6.54434e-19
ENSG00000205414.1	AC007608.1	-2.21095	2.98743	5.83762e-05	-3.89863	4.89733	9.73477e-19
ENSG00000093100.13	AC016026.1	-1.73168	4.66855	1.09327e-06	-2.05437	7.36668	1.95015e-18
ENSG00000274628.4	AL669942.1	-3.11375	4.29967	0.00052162	-3.4491	5.28425	6.74829e-18
ENSG00000226091.7	LINC00937	1.71593	5.80471	1.64297e-05	1.8089	7.17602	1.10371e-16
ENSG00000259590.1	LINC02244	-2.02121	7.35558	0.0097782	-1.32342	8.63962	1.25284e-13
ENSG00000239219.2	AC008040.1	-2.40912	7.16819	8.3487e-08	-2.23414	8.60683	3.70985e-13
ENSG00000206337.10	HCP5	1.21375	8.74611	0.000663133	1.23169	10.0788	2.52244e-12
ENSG00000278989.1	AP001148.1	-2.5484	1.15055	0.00829142	-3.15595	4.10831	2.63595e-12
ENSG00000271880.1	AGAP11	-2.13825	5.09678	2.983e-05	-1.731	7.34852	4.05563e-12
ENSG00000256508.2	MRGPRF-AS1	-2.95436	3.30145	7.74811e-06	-2.77703	4.89984	1.88147e-11
ENSG00000260188.1	AC002464.1	-2.00679	2.93596	0.00135137	-2.25794	5.08944	1.92051e-11
ENSG00000253154.2	AC100801.1	-3.52364	1.96733	0.00019741	-5.00144	3.15384	2.56962e-11
ENSG00000224945.1	AL353150.1	-3.43123	1.83668	2.75207e-06	-4.23805	3.39835	3.8018e-11
ENSG00000259760.1	AC015660.2	-1.83554	6.80046	0.00878268	-1.34822	8.31954	8.8215e-11
ENSG00000284624.1	AC092902.5	-1.23817	5.66308	0.00959497	-1.31905	7.8302	1.54618e-09
ENSG00000245080.7	MIR3150BHG	-2.42344	3.4521	0.00020607	-3.04109	3.97661	6.0651e-09
ENSG00000254254.5	AC012349.1	-1.92238	4.91016	5.29913e-06	-1.41672	7.33701	3.37112e-08
ENSG00000240240.8	BX664727.3	-2.13826	3.26996	0.00344211	-2.39237	4.04176	3.80048e-08
ENSG00000245248.7	USP2-AS1	-2.796	4.29108	8.44875e-11	-1.89922	5.41497	8.00918e-08
ENSG00000258919.1	AL049836.1	-3.02968	1.34362	0.000542177	-3.59971	3.2141	9.80195e-08
ENSG00000226026.5	AC092802.1	-1.08498	4.42308	0.0424527	-1.4286	6.11901	1.60291e-07
ENSG00000261625.1	AP003071.4	-5.6298	1.3762	2.22425e-08	-3.11697	2.94211	4.50606e-06
ENSG00000225342.2	AC079630.1	1.98929	3.95429	1.85211e-06	1.64486	4.58266	4.60753e-06
ENSG00000274893.1	AL136317.2	-3.10849	1.64458	0.0393165	-4.20706	2.42542	5.55851e-06
ENSG00000205885.7	C1RL-AS1	2.03062	1.92979	0.00330223	2.35962	3.23115	5.65272e-06
ENSG00000254438.1	AC022240.1	-2.60856	2.15302	0.000137249	-1.96238	4.48365	7.89514e-06
ENSG00000234807.6	LINC01135	-2.31975	4.21478	0.00146873	-1.8008	4.96947	1.71133e-05
ENSG00000258791.8	LINC00520	-1.96463	5.0724	5.10038e-07	-1.63549	5.14899	3.99373e-05
ENSG00000242258.1	LINC00996	2.995	1.87157	0.000294712	2.05513	3.39667	4.2064e-05
ENSG00000235493.2	LINC01967	-1.46008	3.50409	0.00651637	-1.27126	5.59176	5.10095e-05
ENSG00000246640.1	PICART1	-2.07902	2.16921	0.000663133	-2.07275	3.45087	7.68062e-05
ENSG00000269446.2	AC006967.3	-2.44064	4.59917	2.3472e-06	-2.22538	3.6094	0.000150207
ENSG00000260943.1	LINC02555	6.7283	0.736261	1.89643e-05	2.51823	2.79054	0.000162218
ENSG00000253103.1	LINC01609	-1.38475	3.86253	0.00413492	-1.08969	5.91656	0.000192596
ENSG00000272405.1	AL365181.3	-2.82303	2.36714	0.00119456	-1.65209	4.79415	0.000205998
ENSG00000258512.1	LINC00239	-1.82955	2.00108	0.00776378	-2.09325	3.25679	0.000288837
ENSG00000254586.1	AC124301.1	-3.5911	0.260367	0.0430481	-3.23143	2.37383	0.000365438
ENSG00000285744.1	AC083837.2	3.30631	2.27588	1.72194e-08	1.37983	4.73116	0.000370291
ENSG00000251301.6	LINC02384	2.62067	1.95799	6.85718e-05	1.76484	4.70384	0.000546501
ENSG00000242861.1	AL591895.1	-1.07448	3.45161	0.0255395	-1.09099	5.60584	0.000814386
ENSG00000249628.3	LINC00942	2.431	1.45869	0.0316361	1.73376	3.27238	0.000996649
ENSG00000229646.2	AL109914.1	-2.38991	1.18611	0.026452	-2.34853	2.59278	0.00124389
ENSG00000227017.1	AC007036.1	3.73609	2.27031	3.40075e-09	2.27876	2.92577	0.00142217
ENSG00000233559.1	LINC00513	-2.30097	1.8662	0.000460445	-1.27734	4.17025	0.00397995
ENSG00000242611.2	AC093627.6	1.97677	1.47481	0.015238	1.70645	3.65034	0.00499757
ENSG00000280152.1	AC009078.3	-1.86029	2.70138	0.00802825	-1.52739	3.23532	0.00578168
ENSG00000249042.5	AC008771.1	-1.63747	2.6704	0.0209915	-1.20975	4.11879	0.00676661
ENSG00000278107.1	AC027575.2	-6.2676	0.356332	0.00052162	5.49722	0.851884	0.0107653
ENSG00000256116.1	AP001453.1	-1.4394	2.61355	0.0499421	-1.12642	4.23373	0.0131066
ENSG00000283646.1	LINC02009	-3.63697	1.34225	0.00179792	-1.47186	3.4751	0.0145693
ENSG00000279805.1	Z95114.3	2.51192	1.98005	0.00214085	1.51622	2.88973	0.0164063
ENSG00000254740.2	AP003396.3	-1.6386	1.83329	0.0248907	-1.77831	2.5342	0.0178652
ENSG00000235513.1	AL035681.1	2.37348	2.91094	0.000461166	1.05014	3.56689	0.0393264
