# Supplementary material for: Profiles of Long Non-Coding RNAs and mRNA Expression in Human Macrophages Regulated by Interleukin-27
Source: MDPI journal article supplement (doi:10.3390/ijms20246207), 2019-12-09
Supplement: s1 [file s1 › Table S4.xlsx]

## Sheet: Sheet1
Table S4. Significant differentially expressed novel lncRNA genes in IL-27 regulated Macrophages
Novel lncRNA Name	Locus	Nearset Gene	IMAC			ABI
			log2FC	Average log2CPM	FDR	log2FC	Average log2CPM	FDR
LHRI_LNC54	15:83090415-83092899:-	AC022558.2	-1.47464	3.65966	0.00540026	-1.14056	4.01494	0.0170871
LHRI_LNC37	15:83093998-83110660:-	AC022558.2	-2.48118	5.80108	7.44763e-05	-1.68987	6.92088	3.21522e-12
LHRI_LNC38	15:99292466-99401315:-	AC015660.2	-1.76573	10.1202	0.000283904	-1.02703	11.3418	1.1336e-18
LHRI_LNC60	15:99417817-99418220:-	NA	-1.55063	4.33685	1.64297e-05	-1.43461	6.85265	3.85764e-09
LHRI_LNC1	15:99419766-99420013:-	NA	-1.69838	5.23392	4.02982e-06	-1.40142	7.39815	3.07952e-09
LHRI_LNC93	16:21794095-21799094:-	AC092375.2	-1.14165	6.69417	0.00457712	-1.3816	8.0484	7.44326e-12
LHRI_LNC100	16:27247239-27290492:+	AC106739.1,NSMCE1	-1.42166	4.53964	0.0015552	-1.48705	8.24304	1.05013e-08
LHRI_LNC109	1:58882874-59029995:-	AC105277.1	-1.88659	5.30206	1.22278e-07	-2.8288	7.66492	6.76527e-38
LHRI_LNC150	1:64093872-64171288:-	ROR1-AS1	-3.22708	4.52797	9.63157e-09	-2.68397	4.97205	3.1264e-11
LHRI_LNC201	17:31347039-31348650:+	NF1	-1.25642	5.62799	0.0152096	-1.23029	6.78444	8.00918e-08
LHRI_LNC257	17:66451211-66463212:-	PRKCA	-2.06271	3.4715	1.64297e-05	-6.29085	3.47254	1.76026e-16
LHRI_LNC278	18:1559875-1647163:+	AC008109.1	-1.66946	3.28942	0.0044718	-2.00966	3.79443	0.0464435
LHRI_LNC281	18:3466297-3487048:+	GAPLINC	-1.56909	4.96793	0.00315109	-1.26907	7.00338	0.000108193
LHRI_LNC2	18:45800523-45826194:-	SIGLEC15	-1.75361	2.27892	0.0107811	-1.98576	4.80597	1.93591e-06
LHRI_LNC297	18:62610675-62613670:+	NA	-2.23576	3.8856	1.43977e-07	-2.67111	5.21351	3.21061e-15
LHRI_LNC367	19:41526591-41531558:-	AC243960.3	1.41875	3.2034	0.010113	1.09395	6.91274	1.24772e-06
LHRI_LNC376	19:44684991-44689003:+	AC243964.2	1.1625	3.92225	0.010429	1.04111	5.84741	0.000814424
LHRI_LNC390	19:51770630-51771391:+	FPR1	2.70796	2.6734	8.58022e-08	2.03698	2.79863	0.00160623
LHRI_LNC399	19:54269821-54271666:-	NA	3.04139	1.35246	0.00713382	1.35175	3.41826	0.0141435
LHRI_LNC414	2:9773132-9779779:-	NA	-1.33037	2.88307	0.0223621	-1.39165	4.86595	0.000207758
LHRI_LNC464	2:64757058-64863626:-	LINC01800	-2.47093	3.30997	0.011094	-1.67534	4.184	0.000288837
LHRI_LNC494	2:96058327-96063821:+	NA	-1.97323	4.85834	0.00419217	-1.87073	6.18347	8.60414e-12
LHRI_LNC498	2:97081100-97083414:+	GPAT2P2	-1.28892	7.19025	0.0251923	-1.82172	7.67451	6.84121e-20
LHRI_LNC513	2:109128251-109129241:+	SH3RF3-AS1	-1.2801	4.14789	0.0498547	-1.17444	4.9726	0.0201728
LHRI_LNC528	2:122761003-122887677:+	NA	-2.84922	3.13298	1.28453e-06	-3.31704	8.02887	8.80236e-39
LHRI_LNC570	2:191600073-191604929:+	NA	-1.86576	2.27769	0.0255395	-1.71071	5.83394	3.85185e-10
LHRI_LNC572	2:195549905-195552978:-	NA	-1.37683	4.41816	0.00893785	-1.15136	5.39974	0.00142043
LHRI_LNC573	2:195569628-195574512:-	LINC01827	-1.13073	5.0952	0.00567949	-1.31015	5.95821	1.84254e-06
LHRI_LNC627	20:15893537-15894293:-	MACROD2	-3.03528	1.59213	0.00684525	-2.2817	2.95333	0.000464883
LHRI_LNC656	20:40693395-40889464:-	AL035665.1,RNA5SP484	-2.40639	7.84664	1.67492e-10	-2.2789	7.71953	1.58023e-25
LHRI_LNC671	20:62594156-62605710:-	BX640514.2	-1.59255	6.46737	0.00403194	-2.38078	6.99734	1.05722e-24
LHRI_LNC700	21:36430091-36532408:+	AP000695.1	-1.48292	4.28244	0.0172015	-1.69107	6.21493	1.74453e-11
LHRI_LNC734	22:32743193-32753741:+	SYN3	-1.71399	6.51482	5.5593e-06	-1.58192	9.01875	6.3599e-13
LHRI_LNC765	22:50542305-50544866:-	U62317.2	4.45383	1.97462	4.21624e-08	2.51895	2.92966	7.86024e-06
LHRI_LNC775	3:12317702-12328752:-	AC091492.1	-1.58289	4.0653	4.31656e-05	-1.5338	4.89059	2.08427e-05
LHRI_LNC39	3:119516350-119517514:-	TIMMDC1	2.86652	2.25644	1.22278e-07	1.55041	2.92233	0.0117788
LHRI_LNC877	3:152870110-152873871:+	NA	-1.56928	4.14961	0.00429679	-2.34757	2.58489	0.00166231
LHRI_LNC901	3:186371142-186401718:-	NA	-4.36894	2.89359	4.56864e-10	-2.93369	3.73973	5.40635e-07
LHRI_LNC40	4:184843309-184853644:-	MIR3945HG	2.79684	5.81816	4.7609e-10	1.28308	5.61272	0.000584746
LHRI_LNC8	5:122628756-122697397:-	LINC02201	-1.27815	3.41902	0.011094	-1.14545	5.80311	0.000517761
LHRI_LNC1111	5:160436849-160437712:+	NA	-2.55448	2.01916	0.00160993	-3.29332	3.63207	9.95897e-10
LHRI_LNC41	6:33017245-33018093:-	NA	4.88269	2.44128	5.25654e-13	3.20029	3.06983	8.77206e-09
LHRI_LNC42	6:110475430-110479436:+	AC002464.1	-2.02839	2.35628	0.000461166	-1.90713	3.51102	0.000133136
LHRI_LNC1217	6:134632133-134633293:-	AL078590.3	1.04968	3.06254	0.0397777	1.37908	4.11518	0.00278184
LHRI_LNC43	6:137940927-137957711:-	AL591468.1	5.20472	6.31156	6.20887e-40	2.05558	5.85652	1.99547e-11
LHRI_LNC1235	6:163616410-163661522:-	NA	-2.1586	5.34086	5.74948e-06	-2.32437	6.16752	6.58532e-18
LHRI_LNC35	7:97927122-97927344:-	AC079781.5	1.24486	2.51598	0.0417028	1.95202	2.70127	0.00372889
LHRI_LNC3	7:157105639-157123563:+	AC006967.3	-2.44633	4.98425	1.28764e-13	-2.17789	5.44239	3.07952e-09
LHRI_LNC1377	8:12194886-12567017:+	AC145124.1,AC068587.4	-1.03735	6.02512	0.0097782	-1.49952	6.42151	4.76291e-10
LHRI_LNC44	8:19848613-19876735:-	INTS10	-2.97848	0.915758	0.0449575	-2.43957	2.33471	0.00300817
LHRI_LNC1381	8:22953632-22983001:-	PEBP4,RN7SL303P	-3.39841	2.40139	3.66702e-07	-2.56507	2.13572	0.0139622
LHRI_LNC1390	8:37326575-37331980:-	AC091182.1	-2.96717	3.80862	0.00114296	-2.2417	6.5275	8.80454e-18
LHRI_LNC1395	8:53044228-53044430:-	NA	-2.5136	2.71595	0.0275326	-1.32456	5.32626	7.62736e-05
LHRI_LNC6	8:85839705-85908613:+	AC100801.1	-3.41366	2.69066	5.21289e-06	-3.43392	3.64713	6.35133e-10
LHRI_LNC1425	1:224611399-224617241:-	AC096537.1	-1.07138	3.90799	0.0478625	-1.02333	5.61716	0.00134683
LHRI_LNC1428	8:96774907-96793406:-	CPQ	-2.55317	3.372	2.91066e-09	-3.0977	2.53231	0.000154172
LHRI_LNC1444	8:128799894-128966001:-	CCDC26	-6.36441	0.521347	0.000568251	-4.9716	3.48688	1.2374e-13
LHRI_LNC1501	9:40321299-40329027:+	BX664727.3	-2.8363	3.63251	3.36954e-05	-3.12343	5.75351	7.94958e-17
LHRI_LNC1502	9:40318733-40319203:+	BX664727.3	-2.854	3.58332	0.00279855	-3.50319	4.14692	1.19665e-09
LHRI_LNC1516	9:64495420-64496477:+	NA	-3.22509	2.23513	0.00114296	-3.71417	2.5415	2.00113e-05
LHRI_LNC45	9:64789716-64870654:-	AL359955.1,NA	-9.20209	2.80586	6.37292e-23	-5.34336	3.08875	2.8639e-11
LHRI_LNC1522	9:71203963-71204218:+	TRPM3	-1.37814	4.02104	0.000808352	-1.29213	6.27201	6.70756e-07
LHRI_LNC1523	9:72163278-72291857:-	GDA,AL135924.1	-2.69744	8.38584	4.21089e-05	-2.11954	8.91732	9.09088e-29
LHRI_LNC46	9:89110657-89110979:-	SHC3	-4.05172	0.673119	0.00183893	-2.94912	1.95544	0.00518553
LHRI_LNC1551	9:111272499-111284836:-	AL162414.1	6.189	2.09001	2.91066e-09	2.67015	1.5318	0.0131474
LHRI_LNC1635	X:46759263-46780647:-	NA	3.96061	3.04228	8.34901e-12	3.23313	2.73577	7.3434e-07
LHRI_LNC1690	Y:11473481-11473707:-	AC134879.2	-3.89586	0.488638	0.00849493	-5.02261	2.31886	3.41732e-06
LHRI_LNC1738	10:69924717-69957441:-	COL13A1	-3.18288	5.46952	5.86113e-09	-3.26317	6.61107	4.28371e-34
LHRI_LNC4	10:96751826-96755077:+	RPL13AP5	-2.76966	4.02639	1.72194e-08	-3.90169	5.28008	1.16001e-25
LHRI_LNC36	11:3583436-3583764:-	NA	2.21211	2.53786	2.63189e-05	2.02027	4.14159	5.81265e-07
LHRI_LNC1801	1:21429753-21432065:+	HS6ST1P1	-1.30355	8.48462	0.00126643	-1.01897	10.5371	4.05563e-12
LHRI_LNC1854	11:69012611-69048394:+	MRGPRF	-3.73995	3.02781	1.01668e-06	-3.73156	4.61502	6.47147e-17
LHRI_LNC1859	11:72161645-72209257:-	AP000812.1	-2.61346	4.72476	2.27762e-05	-3.04165	5.95309	2.8412e-25
LHRI_LNC1873	11:102034539-102034750:-	NA	-1.8613	4.5503	0.00010589	-1.69364	6.89976	8.00918e-08
LHRI_LNC1881	11:110375514-110407665:+	AP000924.1	-2.50255	5.93488	0.000689156	-3.05202	7.22695	8.14643e-23
LHRI_LNC1882	11:110371784-110377922:-	AP000924.1	-2.37809	5.56032	1.47688e-05	-2.56495	6.83281	1.31053e-13
LHRI_LNC33	11:117833893-117842144:+	AP000757.1	1.32718	4.94285	0.000938712	2.46038	3.1199	0.0148133
LHRI_LNC1896	11:132386523-132386728:+	NA	-1.10657	4.33436	0.0164773	-1.16042	6.18249	9.99936e-06
LHRI_LNC34	12:8356966-8453204:-	AC092865.3,LINC00937,OR7E149P	2.16338	5.41488	2.93818e-10	2.06533	7.48306	3.40488e-23
LHRI_LNC1928	12:16321528-16352748:-	MGST1	-1.65456	4.34284	0.0407011	-1.1112	5.45196	0.000788221
LHRI_LNC1941	12:46383712-46652577:+	AC008014.1	-2.28273	1.89753	0.000285192	-2.44327	4.10842	2.80074e-07
LHRI_LNC1956	12:55729135-55730852:+	AC009779.2	7.49238	1.28444	1.22278e-07	-2.64713	3.26797	3.9094e-05
LHRI_LNC1976	12:89012268-89052265:-	AC024909.1	-1.6766	3.88146	3.36954e-05	-1.00294	5.43268	0.0042781
LHRI_LNC5	12:101646720-101650537:-	AC117505.1	-3.37588	2.40044	1.28644e-07	-4.53869	5.34323	6.75066e-21
LHRI_LNC1995	12:111284071-111315174:-	CUX2	-1.1189	5.58764	0.015238	-1.20686	6.83713	0.000601313
LHRI_LNC2087	14:92750389-92752456:+	NA	1.569	3.21299	0.00437496	1.31271	3.17343	0.0331806
LHRI_LNC2110	15:34496070-34496291:+	FSCN1P1	-1.3163	5.92987	0.00153694	-1.0027	8.30283	4.89974e-07
LHRI_LNC7	15:70129563-70364229:-	AC048383.1	-2.00768	5.69167	5.44136e-05	-2.64432	6.43653	7.07086e-27
