# Supplementary material for: Profiles of Long Non-Coding RNAs and mRNA Expression in Human Macrophages Regulated by Interleukin-27
Source: MDPI journal article supplement (doi:10.3390/ijms20246207), 2019-12-09
Supplement: s1 [file s1 › Table S5.xlsx]

## Sheet: Sheet1
Table S5. Significant differentially expressed coding genes in IL-27 regulated Macrophages
Ensemble Name	Gene Name	IMAC			ABI
		log2FC	Average log2CPM	FDR	log2FC	Average log2CPM	FDR
ENSG00000196735.11	HLA-DQA1	4.6799	7.41832	7.00905e-20	4.65985	6.87192	3.74258e-139
ENSG00000170323.8	FABP4	-2.89491	7.82854	4.52624e-18	-3.08425	6.27872	9.97961e-124
ENSG00000206306.10	HLA-DRB1	2.55919	7.59565	0.00088485	3.21773	8.28253	6.35619e-113
ENSG00000157510.13	AFAP1L1	-1.71585	7.39835	2.84325e-12	-2.59752	6.96413	1.56192e-102
ENSG00000173369.15	C1QB	4.87091	7.54068	1.9769e-08	2.77409	5.92402	1.90727e-101
ENSG00000224103.7	HLA-DPA1	4.10466	8.46124	5.33614e-17	2.68032	8.4856	1.65773e-97
ENSG00000019582.14	CD74	3.06808	11.545	2.37135e-14	2.49044	11.413	3.76801e-95
ENSG00000158517.13	NCF1	3.74733	6.57069	5.88148e-64	2.51182	6.50844	1.82751e-89
ENSG00000088367.21	EPB41L1	-2.39396	5.39347	4.65121e-12	-2.5657	6.55115	1.41343e-86
ENSG00000237710.10	HLA-DPB1	3.74802	8.0285	7.31528e-25	2.77192	5.60224	2.18344e-85
ENSG00000236884.8	HLA-DRB1	3.76854	7.01015	2.47439e-26	3.54093	6.85839	2.76758e-85
ENSG00000230708.10	HLA-DPB1	3.88862	8.0785	2.45004e-18	2.71372	7.87579	6.63705e-82
ENSG00000198502.5	HLA-DRB5	2.73811	8.57647	5.21573e-05	3.46876	7.75196	7.28837e-80
ENSG00000204287.13	HLA-DRA	3.62467	7.61529	1.69421e-39	3.47356	9.20344	2.02834e-79
ENSG00000118113.11	MMP8	-3.73029	4.27577	9.92616e-25	-4.16467	4.33222	4.40325e-76
ENSG00000234794.9	HLA-DRA	2.68482	9.24465	3.91132e-09	3.20069	8.76246	3.85598e-74
ENSG00000168384.11	HLA-DPA1	4.49587	5.28924	0.000353789	2.53172	5.40162	2.0376e-73
ENSG00000147614.3	ATP6V0D2	-1.63992	7.1303	8.91832e-05	-2.11823	6.48076	2.08847e-72
ENSG00000206291.10	HLA-DPA1	3.38157	5.91751	6.24772e-19	2.43022	5.60646	1.97891e-71
ENSG00000155265.10	GOLGA7B	-2.21354	4.86628	1.49863e-21	-2.83081	5.35382	1.60459e-70
ENSG00000149131.15	SERPING1	3.19069	4.92879	5.65427e-26	3.06309	6.21894	1.62549e-70
ENSG00000151376.16	ME3	-2.26959	4.05799	2.78884e-14	-3.07873	4.50062	2.73193e-65
ENSG00000274286.1	ADRA2B	-2.45699	7.63457	1.0754e-06	-2.26771	6.30927	5.42716e-64
ENSG00000005884.17	ITGA3	-1.92378	9.56712	1.14761e-07	-2.31674	8.72036	4.29367e-61
ENSG00000120885.21	CLU	-2.14094	5.44708	6.99973e-13	-3.65509	6.50312	1.82838e-60
ENSG00000137976.7	DNASE2B	-1.6059	5.6507	1.02687e-06	-3.13021	5.02163	1.68605e-53
ENSG00000108679.12	LGALS3BP	3.37997	7.31106	2.00247e-26	2.20137	6.73545	2.10947e-53
ENSG00000165178.9	NCF1C	4.72733	5.29355	1.95398e-70	3.10245	4.2318	6.3917e-52
ENSG00000236177.9	HLA-DPA1	3.37015	8.66274	8.42581e-16	1.97896	6.13178	2.04721e-50
ENSG00000235696.8	C2	2.77923	6.67116	2.58364e-18	2.07794	6.1851	4.61606e-49
ENSG00000196126.11	HLA-DRB1	2.34008	8.47466	1.2867e-13	2.46785	8.09716	3.14746e-47
ENSG00000196549.10	MME	-2.81518	5.39644	7.78256e-07	-2.52691	5.00861	7.64373e-45
ENSG00000069482.6	GAL	-2.57458	4.50636	7.32006e-26	-1.80249	7.4038	1.6582e-44
ENSG00000183856.10	IQGAP3	-1.42528	5.78367	1.61915e-09	-2.14853	5.21708	6.62484e-44
ENSG00000231286.7	HLA-DQB1	2.60531	5.05938	3.102e-10	3.2515	4.78946	3.84437e-43
ENSG00000173372.16	C1QA	4.09995	8.08717	2.82742e-08	1.99389	6.57191	1.32393e-40
ENSG00000265107.2	GJA5	-4.05766	1.87054	2.3416e-07	-5.55448	2.88354	1.346e-40
ENSG00000054793.13	ATP9A	-3.48408	5.21891	1.75394e-21	-3.01204	4.12595	3.95639e-39
ENSG00000156414.18	TDRD9	-2.37419	6.39788	3.70207e-06	-3.26367	5.24598	9.58339e-39
ENSG00000179344.16	HLA-DQB1	3.14134	7.97886	8.36424e-21	2.26751	8.12906	2.40461e-38
ENSG00000196101.9	HLA-DRB3	2.75004	4.84316	2.00054e-13	2.85316	7.4345	5.73855e-38
ENSG00000083457.11	ITGAE	-1.79395	5.42407	7.35175e-08	-1.6473	6.08341	2.04972e-37
ENSG00000169442.8	CD52	-1.48955	9.99741	0.0075319	-1.57983	9.06288	4.73291e-37
ENSG00000273331.1	TM4SF19-TCTEX1D2	-1.08362	5.37344	0.000148432	-1.50254	6.2661	5.24459e-37
ENSG00000162894.11	FCMR	-2.30689	6.44357	2.92873e-10	-2.36788	6.02343	7.33859e-37
ENSG00000127951.6	FGL2	2.58916	8.04186	2.12549e-25	1.44161	6.55816	1.48493e-35
ENSG00000135253.13	KCP	-1.02692	4.2795	0.00136216	-1.63568	5.6608	9.19862e-35
ENSG00000163106.10	HPGDS	-2.35595	3.77552	2.72375e-08	-4.0852	3.19338	9.27033e-35
ENSG00000151491.13	EPS8	-1.74872	5.64106	3.23618e-16	-1.88047	4.95254	1.86889e-34
ENSG00000121152.9	NCAPH	-1.97512	7.66967	2.23862e-06	-3.05084	6.55304	2.21515e-34
ENSG00000173898.12	SPTBN2	-2.9996	4.10583	4.93359e-06	-3.91651	3.78539	7.64097e-34
ENSG00000164120.13	HPGD	-1.55847	6.82069	0.000973403	-1.81435	5.31159	9.62982e-34
ENSG00000188906.15	LRRK2	2.20728	7.16645	5.27116e-13	1.51817	6.0575	5.64957e-33
ENSG00000166523.7	CLEC4E	1.97201	5.13248	6.4631e-09	1.6952	5.4018	7.01288e-33
ENSG00000197046.11	SIGLEC15	-1.76804	5.31987	1.46222e-05	-1.3912	6.17069	1.77159e-32
ENSG00000077009.13	NMRK2	-5.50081	2.80115	2.65703e-25	-5.23549	2.74503	1.90835e-32
ENSG00000146072.6	TNFRSF21	-1.36294	6.7614	0.000614122	-1.66406	5.86657	1.95629e-32
ENSG00000186281.12	GPAT2	-1.53396	6.57604	0.000325223	-1.56936	5.64622	3.47596e-32
ENSG00000197249.13	SERPINA1	3.17284	7.39821	3.77291e-26	1.36421	7.16262	5.57449e-32
ENSG00000172935.8	MRGPRF	-3.25537	3.43795	2.58504e-09	-3.5551	3.87408	1.31689e-31
ENSG00000154451.14	GBP5	4.91132	8.16398	1.00454e-35	2.18777	5.03819	2.99973e-31
ENSG00000179583.19	CIITA	3.32782	6.45431	9.2676e-21	1.52091	5.55792	3.37042e-31
ENSG00000139725.7	RHOF	-1.74889	6.40242	1.54628e-05	-1.38632	6.19533	4.58871e-31
ENSG00000236418.8	HLA-DQA1	4.32976	6.69542	1.05233e-06	2.66874	5.65725	4.78003e-30
ENSG00000134668.12	SPOCD1	-1.41608	6.64882	4.37087e-06	-1.95829	6.52858	8.7967e-30
ENSG00000182487.12	NCF1B	4.90795	4.53442	1.94042e-24	3.36051	3.32651	1.33734e-29
ENSG00000063601.16	MTMR1	-1.08029	6.76903	0.000275975	-1.32562	6.36534	1.9545e-29
ENSG00000169429.10	CXCL8	2.98281	7.1349	3.85361e-05	1.78068	5.02139	3.82178e-29
ENSG00000196586.13	MYO6	-1.7984	3.74244	6.34034e-09	-1.80339	4.9975	5.48743e-29
ENSG00000166278.14	C2	2.47226	4.66542	3.49748e-09	1.92164	4.95252	1.16909e-28
ENSG00000085265.10	FCN1	2.23665	7.05604	2.43517e-14	1.82845	4.85943	4.88897e-28
ENSG00000128284.19	APOL3	3.14651	6.50962	2.22407e-26	1.53241	5.76561	3.55115e-27
ENSG00000159189.11	C1QC	4.35377	5.86986	2.74456e-06	1.80584	4.89584	6.7623e-27
ENSG00000171659.13	GPR34	-1.73966	3.8566	0.00024562	-3.15507	4.02721	8.2386e-27
ENSG00000143320.8	CRABP2	-1.55263	8.20736	7.79602e-05	-1.46682	7.97452	9.40737e-27
ENSG00000105854.12	PON2	-1.14079	4.97561	7.21927e-08	-1.66265	4.65768	1.60625e-25
ENSG00000163975.11	MELTF	-1.69407	5.28257	5.9235e-10	-1.66189	5.03873	3.41275e-24
ENSG00000258227.6	CLEC5A	3.26665	6.19307	4.96854e-14	3.43971	4.12622	3.45195e-24
ENSG00000106178.6	CCL24	3.43556	-0.0120657	0.0040587	4.92724	2.44016	3.67019e-24
ENSG00000039560.13	RAI14	-1.26338	5.3001	6.15606e-06	-1.89403	6.11181	4.68678e-24
ENSG00000162654.8	GBP4	4.72744	6.51698	2.79869e-76	1.66544	4.58751	8.11944e-24
ENSG00000126822.16	PLEKHG3	3.06223	4.40839	9.99568e-25	3.13032	3.86807	1.43307e-23
ENSG00000036672.15	USP2	-1.30965	4.91296	5.1943e-06	-1.44169	5.49174	2.28079e-23
ENSG00000156011.16	PSD3	-1.66214	6.68048	0.000730887	-1.21716	7.02555	2.67614e-23
ENSG00000090104.11	RGS1	-1.83772	5.4814	1.00751e-07	-2.31371	4.84139	3.82419e-23
ENSG00000107736.20	CDH23	-2.20173	7.69413	1.30828e-09	-1.61368	7.54654	1.0037e-22
ENSG00000137714.2	FDX1	-1.30055	8.39865	0.000420551	-1.40207	7.60411	1.30988e-22
ENSG00000019169.10	MARCO	1.78724	5.5077	1.29733e-05	-2.67233	3.98135	2.36155e-22
ENSG00000131355.14	ADGRE3	-3.02623	3.21668	1.00751e-07	-3.97807	2.2452	1.16064e-21
ENSG00000230463.2	HLA-DRB3	3.74595	3.94767	2.84325e-12	2.07382	4.12532	5.43701e-21
ENSG00000085733.15	CTTN	-1.52566	6.43944	8.68096e-09	-1.16396	6.6864	5.62654e-21
ENSG00000105697.8	HAMP	-1.49167	2.9801	3.06275e-05	-1.64364	4.52504	7.94841e-21
ENSG00000102524.11	TNFSF13B	1.45786	6.52945	1.643e-12	1.09766	6.63746	1.386e-20
ENSG00000142583.17	SLC2A5	-1.10607	6.006	0.00050427	-1.30363	7.22498	1.47098e-20
ENSG00000171714.10	ANO5	-1.02742	6.62978	1.92235e-05	-1.42718	4.9734	1.93717e-20
ENSG00000184792.15	OSBP2	-2.64454	3.08733	1.40956e-05	-3.22554	3.32823	2.47616e-20
ENSG00000225824.8	HLA-DQB1	4.84785	4.97925	1.60068e-34	4.34983	3.06041	2.47616e-20
ENSG00000147509.13	RGS20	-2.21955	3.17131	1.03157e-05	-2.01291	4.09983	2.58133e-20
ENSG00000136383.6	ALPK3	-1.59963	2.8358	0.0295529	-2.91833	3.50383	2.87392e-20
ENSG00000214575.9	CPEB1	-3.83537	0.984334	1.81328e-05	-3.34306	2.46701	2.58211e-19
ENSG00000137267.5	TUBB2A	-1.01372	5.68719	4.88403e-06	-1.09662	6.03329	3.99947e-19
ENSG00000135931.17	ARMC9	-1.03862	5.08554	5.58357e-06	-1.37185	5.04315	5.4586e-19
ENSG00000136478.7	TEX2	-1.0465	7.98849	0.000622375	-1.31235	7.46551	7.59753e-19
ENSG00000163171.7	CDC42EP3	-1.13731	6.18192	0.000238467	-1.77456	4.61173	8.50012e-19
ENSG00000113657.12	DPYSL3	-2.18439	3.51587	1.63788e-12	-1.41919	4.79915	1.036e-18
ENSG00000197635.9	DPP4	-2.3247	3.0099	6.22384e-05	-2.50692	3.5298	1.20127e-18
ENSG00000112394.16	SLC16A10	-2.86199	4.23614	3.80031e-27	-2.86824	2.87633	1.60981e-18
ENSG00000133063.15	CHIT1	-1.21273	11.1604	0.0359547	-1.9817	11.0629	1.75678e-18
ENSG00000079337.15	RAPGEF3	-1.73124	5.0005	2.69418e-12	-1.31672	5.33663	2.09494e-18
ENSG00000061676.14	NCKAP1	-2.09585	5.27842	1.60985e-10	-1.16741	5.62433	2.68511e-18
ENSG00000174600.13	CMKLR1	2.2251	6.19938	9.32116e-17	1.86671	7.22561	1.14597e-17
ENSG00000004468.12	CD38	5.82272	4.28409	3.51e-18	3.40779	2.23981	2.10947e-17
ENSG00000100368.13	CSF2RB	1.29953	7.18145	1.61994e-06	1.00423	6.63623	2.28307e-17
ENSG00000232258.6	TMEM114	-3.12307	0.74219	0.00491428	-3.72433	2.34789	3.60081e-17
ENSG00000145730.20	PAM	-1.44703	6.47225	2.65248e-14	-1.28426	5.15624	4.39302e-17
ENSG00000002726.20	AOC1	-2.99479	1.92266	0.0154395	-2.27391	3.79368	5.41472e-17
ENSG00000185436.11	IFNLR1	-1.02984	5.3453	0.000568009	-1.34525	4.73537	6.38739e-17
ENSG00000143786.7	CNIH3	-1.15634	5.37248	7.78256e-07	-1.14466	5.91145	6.45251e-17
ENSG00000158683.7	PKD1L1	-2.94946	1.58779	0.00196445	-3.6207	2.19228	8.37658e-17
ENSG00000138433.15	CIR1	-1.53064	7.33541	3.35253e-06	-1.84735	7.31164	8.85448e-17
ENSG00000079739.15	PGM1	-1.15884	4.79985	0.00351251	-1.55292	4.60717	8.93093e-17
ENSG00000175463.11	TBC1D10C	-1.26338	5.80261	1.00756e-05	-1.20324	5.25	1.22547e-16
ENSG00000169860.6	P2RY1	-1.42927	4.85246	1.86879e-06	-1.81622	4.19417	1.42599e-16
ENSG00000277377.4	SERPINA1	2.14199	2.37376	0.00320291	1.51941	5.64263	1.92919e-16
ENSG00000162723.9	SLAMF9	-1.84631	4.08942	1.41885e-05	-2.18691	3.58968	2.2033e-16
ENSG00000129116.17	PALLD	-1.64991	3.30353	0.00156774	-1.34465	5.1244	2.92238e-16
ENSG00000243156.7	MICAL3	-1.56084	3.60384	1.01986e-07	-1.94511	4.03987	4.24319e-16
ENSG00000139626.15	ITGB7	1.60238	6.8784	0.0291448	2.43013	4.69533	5.59833e-16
ENSG00000162817.6	C1orf115	-3.14513	3.61809	7.89091e-09	-2.58369	3.03465	5.96135e-16
ENSG00000114107.8	CEP70	-1.91959	4.12105	1.8406e-10	-2.49126	3.11126	7.60916e-16
ENSG00000203799.12	CCDC162P	-1.6859	4.20435	0.000530088	-2.69068	2.7714	8.25585e-16
ENSG00000165949.12	IFI27	6.61839	3.21983	4.76607e-19	3.96821	1.4125	8.79652e-16
ENSG00000166949.15	SMAD3	-1.61117	2.283	0.00626243	-2.77174	2.87742	1.14869e-15
ENSG00000018408.14	WWTR1	-1.54192	3.70559	0.000107911	-2.39195	3.25689	1.59718e-15
ENSG00000277807.5	LILRB1	1.48825	4.81237	6.23651e-10	1.23092	5.72742	3.33205e-15
ENSG00000185640.5	KRT79	-3.81518	4.09614	1.75478e-06	-2.77334	2.57402	5.53694e-15
ENSG00000158715.5	SLC45A3	-1.70526	4.57787	3.30022e-13	-1.22699	5.10694	6.60769e-15
ENSG00000020577.13	SAMD4A	1.2332	5.78374	5.52341e-07	1.08883	5.43352	8.62391e-15
ENSG00000101251.12	SEL1L2	-3.11	-0.882498	0.0195084	-6.1625	0.545304	9.58968e-15
ENSG00000206292.13	HLA-DOA	6.03252	5.01221	2.43517e-14	4.10486	1.75208	9.80373e-15
ENSG00000152767.16	FARP1	-1.76113	4.24074	2.839e-08	-1.72131	4.50854	9.89789e-15
ENSG00000196743.8	GM2A	-1.13358	11.848	0.0106493	-1.13309	11.6526	1.22087e-14
ENSG00000022267.16	FHL1	-2.40428	5.45199	1.39615e-16	-2.14718	4.9517	1.48252e-14
ENSG00000258947.6	TUBB3	-1.4583	3.29952	0.00135774	-2.43804	3.38437	1.63791e-14
ENSG00000162433.14	AK4	-1.28169	6.2004	0.0011113	-1.05884	5.49411	2.61608e-14
ENSG00000277414.4	LILRB5	3.16474	4.27588	0.012701	1.17863	4.8486	2.8683e-14
ENSG00000118971.7	CCND2	-1.24447	7.95144	0.00014007	-1.25656	5.75843	3.1808e-14
ENSG00000100385.13	IL2RB	3.68878	0.0759212	0.000483363	4.6505	0.886495	4.09233e-14
ENSG00000173210.19	ABLIM3	-1.65564	3.09196	0.000125318	-1.73159	4.10517	5.2744e-14
ENSG00000138755.5	CXCL9	8.83837	3.97205	2.24671e-65	3.73536	1.59365	7.51754e-14
ENSG00000182378.13	PLCXD1	-1.09066	5.52532	8.53214e-08	-1.14088	4.82726	8.50014e-14
ENSG00000112379.8	ARFGEF3	-2.80812	2.93215	1.40473e-05	-2.54565	3.77976	9.2053e-14
ENSG00000102962.4	CCL22	-3.46947	7.50272	0.000207626	-2.05245	7.5319	1.01065e-13
ENSG00000067177.14	PHKA1	-1.66167	2.95213	0.000189124	-2.03838	3.44118	1.33747e-13
ENSG00000100344.10	PNPLA3	-1.97587	2.11063	0.00126166	-3.0429	2.24917	1.33747e-13
ENSG00000121769.7	FABP3	-1.14765	6.56579	1.22725e-07	-1.13452	6.63769	1.47993e-13
ENSG00000259207.7	ITGB3	-2.32385	3.18806	3.82655e-07	-2.15327	3.59914	1.55107e-13
ENSG00000166444.18	ST5	-1.21194	3.51688	0.000965723	-1.42863	4.3262	2.36078e-13
ENSG00000176046.8	NUPR1	2.71397	5.0641	8.58313e-09	1.60031	5.09069	2.40948e-13
ENSG00000066056.13	TIE1	-3.21397	6.29163	1.79189e-06	-1.04032	5.81888	2.71572e-13
ENSG00000169439.11	SDC2	-1.25702	8.09978	0.000142525	-1.27387	6.19332	3.45826e-13
ENSG00000133101.9	CCNA1	-1.65146	3.85493	2.3416e-07	-1.31273	4.42772	3.60162e-13
ENSG00000111907.20	TPD52L1	-4.28831	2.07498	7.80938e-09	-3.92114	1.35976	7.15147e-13
ENSG00000106034.17	CPED1	1.3387	5.63228	1.65407e-07	1.43278	4.15672	7.83303e-13
ENSG00000128045.6	RASL11B	-1.09847	3.36482	0.000762648	-1.91267	3.71659	8.10683e-13
ENSG00000176658.16	MYO1D	-1.74303	4.45158	1.98116e-06	-1.67018	3.90858	9.68965e-13
ENSG00000118777.11	ABCG2	-1.94465	4.44607	5.42297e-16	-2.15282	3.41081	1.00695e-12
ENSG00000159403.15	C1R	3.02338	1.84024	8.44324e-05	2.51292	2.54111	1.02144e-12
ENSG00000073464.11	CLCN4	2.57838	3.58972	4.43386e-09	2.24771	2.67882	1.55921e-12
ENSG00000184588.17	PDE4B	3.34103	3.66438	1.49559e-11	2.19252	2.82183	1.83391e-12
ENSG00000171388.11	APLN	-2.53447	0.0138725	0.0303158	-4.5757	0.71296	1.99357e-12
ENSG00000182326.14	C1S	4.14044	2.78049	8.07991e-06	3.32798	3.12245	1.99357e-12
ENSG00000205213.13	LGR4	-1.06854	4.16147	0.00145237	-2.07418	3.3496	2.74827e-12
ENSG00000132965.9	ALOX5AP	-1.1157	5.03028	0.00250058	-1.29698	4.48168	3.18066e-12
ENSG00000107338.9	SHB	-1.16147	4.94674	0.000780769	-1.23156	4.42118	3.36695e-12
ENSG00000205846.3	CLEC6A	2.66846	2.6772	1.79837e-11	2.33121	2.54757	3.61292e-12
ENSG00000167680.15	SEMA6B	1.59111	4.58249	8.76191e-09	1.11625	4.60951	4.99463e-12
ENSG00000137731.13	FXYD2	1.6825	2.57841	0.000536867	1.1616	4.67376	5.13969e-12
ENSG00000203685.9	STUM	-1.72709	2.58324	0.00129179	-2.00726	4.32444	5.94247e-12
ENSG00000151704.15	KCNJ1	-1.59762	4.70239	4.11143e-08	-1.19581	5.18871	7.59493e-12
ENSG00000142798.18	HSPG2	-3.64683	3.56924	2.75636e-08	-2.1504	3.23535	8.30955e-12
ENSG00000135472.8	FAIM2	-2.55953	3.90797	0.00719796	-1.70629	4.03345	1.09155e-11
ENSG00000154153.13	RETREG1	-1.89956	5.35497	0.000307614	-1.81862	3.57608	1.15073e-11
ENSG00000186417.13	GLDN	2.92403	2.46998	0.0106279	3.79064	0.789129	1.44589e-11
ENSG00000106025.8	TSPAN12	-4.08423	1.6305	2.44428e-10	-3.69329	1.49848	1.45051e-11
ENSG00000128567.16	PODXL	-3.16019	3.14556	1.57076e-09	-2.52919	3.07175	1.54312e-11
ENSG00000155659.14	VSIG4	2.89404	7.63836	3.85361e-05	1.16287	6.8151	1.7353e-11
ENSG00000112303.13	VNN2	1.00407	5.503	0.00392225	1.10363	5.20231	2.0364e-11
ENSG00000108688.11	CCL7	1.41472	2.993	0.00164169	-2.41595	2.3857	2.11659e-11
ENSG00000153283.12	CD96	3.50148	0.263019	0.000297484	4.57674	0.25042	2.12843e-11
ENSG00000154027.18	AK5	-3.97192	1.98879	9.16281e-14	-4.03365	1.37749	2.13277e-11
ENSG00000242335.8	CFB	3.95231	2.63695	6.50995e-15	1.98167	3.19895	2.46342e-11
ENSG00000058335.15	RASGRF1	-2.26572	3.58627	1.21731e-08	-1.84256	3.88475	3.76172e-11
ENSG00000187474.4	FPR3	1.26432	8.31537	0.004632	1.06791	8.18206	6.60306e-11
ENSG00000139178.10	C1RL	2.0799	3.68383	4.96496e-11	2.49863	2.54931	8.19641e-11
ENSG00000196189.12	SEMA4A	1.5419	5.31406	6.94272e-13	1.05128	6.18829	1.05194e-10
ENSG00000006118.14	TMEM132A	1.40955	1.48169	0.0325354	2.38057	3.505	1.32346e-10
ENSG00000204381.11	LAYN	-1.62835	3.44299	0.0437262	-2.26138	2.68495	1.73301e-10
ENSG00000145832.13	SLC25A48	-5.94548	-0.291676	1.16033e-05	-4.82776	0.112744	1.74268e-10
ENSG00000137942.16	FNBP1L	-1.91995	4.66676	1.75e-13	-1.60648	4.00824	1.81684e-10
ENSG00000087245.12	MMP2	2.02267	2.45042	0.000365828	2.17372	4.90784	2.17348e-10
ENSG00000072134.15	EPN2	-1.97306	3.27414	5.82208e-06	-1.93248	3.03109	2.46784e-10
ENSG00000198203.9	SULT1C2	-1.4244	3.94964	8.36093e-06	-1.71193	4.02795	2.92178e-10
ENSG00000274669.5	LILRB1	1.99352	4.25379	2.3901e-17	1.0212	5.7917	4.07811e-10
ENSG00000277751.4	LILRB2	1.94632	3.06373	4.359e-08	1.3385	4.28553	4.32333e-10
ENSG00000173391.8	OLR1	1.36075	5.77123	0.0328185	2.14169	3.99633	6.6341e-10
ENSG00000148773.13	MKI67	-1.36724	5.68864	4.1991e-11	-2.22377	5.9436	1.30783e-09
ENSG00000171049.8	FPR2	3.64751	3.50903	1.90888e-30	2.00573	2.49825	2.04365e-09
ENSG00000131979.18	GCH1	3.75496	5.12749	1.37072e-33	1.84511	3.26304	2.09607e-09
ENSG00000106565.17	TMEM176B	2.53542	6.23984	9.68284e-36	1.24658	6.91221	2.3212e-09
ENSG00000255833.1	TIFAB	2.90314	4.76741	1.79694e-23	1.22647	4.79753	4.28496e-09
ENSG00000117632.22	STMN1	-1.15091	5.59345	9.84726e-11	-1.83148	5.10516	4.39007e-09
ENSG00000100321.14	SYNGR1	-1.24559	3.99029	0.00229821	-1.26427	4.62128	4.50992e-09
ENSG00000128578.9	STRIP2	-1.79858	2.64126	2.40766e-05	-1.95123	2.707	4.99707e-09
ENSG00000139344.7	AMDHD1	-1.47338	4.47735	5.30927e-10	-1.17711	4.60506	6.56558e-09
ENSG00000158270.11	COLEC12	-1.62218	3.04278	0.0291448	-1.54769	3.72657	8.42895e-09
ENSG00000058404.19	CAMK2B	-2.78273	0.849965	0.000274547	-2.47483	1.95518	8.63164e-09
ENSG00000159674.11	SPON2	1.13072	8.14579	0.000241868	1.17886	6.18299	1.04988e-08
ENSG00000008517.16	IL32	5.71758	2.08367	1.7422e-08	1.97211	2.4164	1.16958e-08
ENSG00000163568.14	AIM2	6.27167	2.74678	1.10432e-30	4.14455	0.0279228	1.31578e-08
ENSG00000183578.6	TNFAIP8L3	-1.4282	3.14288	6.37715e-05	-1.95067	2.52833	1.50031e-08
ENSG00000166527.7	CLEC4D	2.32677	3.2829	9.21221e-13	2.64277	1.48976	1.51389e-08
ENSG00000134057.14	CCNB1	-1.01564	4.33176	0.00104431	-1.88055	3.69993	2.22001e-08
ENSG00000185933.6	CALHM1	-3.49271	3.95171	1.30966e-06	-3.01053	1.97021	2.22001e-08
ENSG00000122641.10	INHBA	3.86074	1.44826	6.23651e-10	2.52933	1.96852	2.22633e-08
ENSG00000119862.12	LGALSL	-1.46529	3.79667	2.18988e-06	-1.68042	3.59992	2.26314e-08
ENSG00000154277.12	UCHL1	-2.5267	5.57853	1.03264e-07	-1.28897	6.55084	2.89756e-08
ENSG00000073711.10	PPP2R3A	-1.89267	4.22694	1.11627e-11	-1.53989	3.47724	3.08228e-08
ENSG00000171848.14	RRM2	-1.73871	5.38693	1.86897e-07	-2.1677	5.17419	3.20342e-08
ENSG00000111305.18	GSG1	-1.67672	2.0886	0.00430175	-2.4399	1.91872	3.49468e-08
ENSG00000198901.13	PRC1	-1.05544	4.56103	0.000238467	-2.31927	3.66959	4.10529e-08
ENSG00000172889.15	EGFL7	-2.63022	3.47078	9.5386e-15	-2.41891	1.76169	4.69174e-08
ENSG00000148082.9	SHC3	-3.06392	2.07414	8.60723e-08	-3.85834	0.177205	5.17339e-08
ENSG00000090659.17	CD209	3.51606	4.40049	1.13424e-06	1.58386	3.22774	5.6681e-08
ENSG00000149633.11	KIAA1755	1.82478	1.04478	0.00661379	1.93951	2.38317	6.21896e-08
ENSG00000013016.15	EHD3	-1.64722	3.8134	1.49883e-07	-1.5165	3.90651	9.03143e-08
ENSG00000187764.11	SEMA4D	2.5119	4.19318	9.65971e-10	1.43508	3.60011	9.29715e-08
ENSG00000186231.16	KLHL32	-3.34082	1.50766	4.53699e-06	-3.35376	0.822795	9.30074e-08
ENSG00000079393.20	DUSP13	-2.81221	2.11407	1.71948e-06	-2.61192	2.17473	1.03991e-07
ENSG00000129422.14	MTUS1	-1.22473	4.47016	3.51278e-05	-1.4482	3.74456	1.13807e-07
ENSG00000127399.14	LRRC61	2.7857	0.84017	0.000467336	2.03213	2.10718	1.29367e-07
ENSG00000198542.13	ITGBL1	-2.08678	2.39903	2.68063e-05	-3.11986	0.776299	1.43936e-07
ENSG00000275644.4	OSCAR	5.36237	2.28622	0.000109563	-2.23926	4.18897	1.52447e-07
ENSG00000105609.16	LILRB5	2.13484	3.15406	0.0130256	2.22802	1.69426	2.18222e-07
ENSG00000169758.12	TMEM266	-2.03335	3.53826	5.9235e-10	-1.49366	3.42746	2.23094e-07
ENSG00000011083.8	SLC6A7	-1.93823	0.296896	0.0401268	-2.89856	1.38462	2.67414e-07
ENSG00000115648.13	MLPH	-1.61795	2.04413	0.00162877	-1.60121	3.01803	2.97264e-07
ENSG00000093009.9	CDC45	-1.5393	2.26717	0.0324404	-1.99638	2.23928	3.24566e-07
ENSG00000107742.12	SPOCK2	1.80422	1.37035	0.0225222	2.69275	0.87128	3.54977e-07
ENSG00000117594.9	HSD11B1	2.10447	5.0379	4.55556e-09	1.36823	3.59823	3.551e-07
ENSG00000271503.5	CCL5	1.40345	2.54886	0.000779065	1.19529	4.1409	3.70521e-07
ENSG00000131203.12	IDO1	6.39965	4.11708	1.3959e-12	2.76545	0.729419	3.92547e-07
ENSG00000136634.5	IL10	-1.33438	2.96676	0.00163378	-1.62976	2.78141	3.92547e-07
ENSG00000100628.11	ASB2	-1.53955	4.42353	0.000253357	-1.64063	3.44005	3.96167e-07
ENSG00000024526.16	DEPDC1	-1.79852	2.56724	0.000881436	-2.79522	1.61847	4.04246e-07
ENSG00000156218.12	ADAMTSL3	-1.26774	3.9632	0.00015769	-1.19635	4.0542	4.30172e-07
ENSG00000163697.16	APBB2	-1.1983	4.50504	0.00044569	-1.22169	4.19132	5.56585e-07
ENSG00000130487.6	KLHDC7B	4.23642	1.11079	3.87417e-10	2.81638	0.541968	5.86164e-07
ENSG00000156970.12	BUB1B	-1.50271	3.55877	0.000208889	-2.20912	3.16929	6.57634e-07
ENSG00000117724.12	CENPF	-1.24484	4.86553	3.11697e-06	-2.01774	4.06568	7.01127e-07
ENSG00000174938.14	SEZ6L2	-1.27801	4.45667	2.04674e-06	-1.03633	4.55787	7.41465e-07
ENSG00000151715.7	TMEM45B	-3.1251	2.6249	0.000261021	-2.00507	2.09612	7.95205e-07
ENSG00000261011.1	AL136982.4	-2.13154	1.80996	0.00188476	-2.16465	2.02712	8.22248e-07
ENSG00000183785.14	TUBA8	-3.04565	3.60412	0.00240594	-1.67161	3.19502	9.3746e-07
ENSG00000163661.3	PTX3	-2.27409	3.66052	5.62101e-09	-2.09967	2.03698	9.89185e-07
ENSG00000088325.15	TPX2	-1.28053	4.25137	1.32959e-05	-1.83529	4.05633	1.08427e-06
ENSG00000171241.8	SHCBP1	-1.1253	3.70116	0.00475819	-1.77884	3.87319	1.30414e-06
ENSG00000188026.12	RILPL1	-1.13565	3.01568	0.00218018	-1.3217	3.53125	1.31553e-06
ENSG00000179270.6	C2orf71	-3.33465	-0.35589	0.0095529	-2.47483	1.34137	1.33652e-06
ENSG00000125384.6	PTGER2	1.15416	4.0246	8.2866e-05	1.13813	4.07674	1.43208e-06
ENSG00000137819.13	PAQR5	-1.31445	6.18935	1.12524e-09	-1.08726	4.40249	1.68766e-06
ENSG00000049089.14	COL9A2	-1.72827	4.99368	1.61361e-05	-1.22043	3.88852	1.87131e-06
ENSG00000166963.12	MAP1A	-2.29464	3.77251	8.15379e-19	-1.07601	4.04124	2.16804e-06
ENSG00000101280.7	ANGPT4	-2.9416	1.54116	2.22986e-05	-2.59498	0.896501	2.27436e-06
ENSG00000146670.9	CDCA5	-1.07987	2.79041	0.0417623	-1.85811	3.50263	2.56725e-06
ENSG00000122966.15	CIT	-1.07558	2.73861	0.0269751	-2.10583	2.74745	2.64172e-06
ENSG00000100336.17	APOL4	4.43367	4.36409	3.81604e-70	1.79035	2.22011	2.79563e-06
ENSG00000011426.10	ANLN	-1.71046	4.78612	2.0807e-06	-2.36545	3.92505	2.86846e-06
ENSG00000168899.4	VAMP5	2.31896	3.21664	1.38859e-10	1.26807	3.59809	2.96961e-06
ENSG00000140511.11	HAPLN3	7.29999	2.73629	3.27035e-33	3.17853	-0.252606	3.71259e-06
ENSG00000166851.14	PLK1	-1.5639	3.1366	0.000255422	-1.97144	3.16248	5.64519e-06
ENSG00000066279.17	ASPM	-1.86595	4.37464	9.24289e-09	-2.34521	3.06135	5.79826e-06
ENSG00000141655.16	TNFRSF11A	-2.09363	4.0917	5.64208e-08	-1.51179	3.19472	7.47564e-06
ENSG00000131747.14	TOP2A	-1.51937	5.47825	2.46597e-07	-2.07189	4.87134	7.70197e-06
ENSG00000170312.15	CDK1	-1.45702	4.134	0.0001224	-2.44077	3.63342	8.45583e-06
ENSG00000189057.10	FAM111B	-1.40027	4.38563	0.000102375	-2.13166	3.33279	8.74335e-06
ENSG00000229698.11	HLA-F	6.81231	0.13924	1.10253e-08	1.01793	5.10403	9.37538e-06
ENSG00000185483.11	ROR1	-2.86477	-0.0256274	0.00276423	-2.94385	0.666906	9.80884e-06
ENSG00000099284.13	H2AFY2	-1.36222	3.38375	3.8658e-05	-1.1047	3.81927	9.90602e-06
ENSG00000167900.11	TK1	-1.09776	4.30266	0.000109189	-1.86292	4.18979	1.09023e-05
ENSG00000110077.14	MS4A6A	1.12057	5.81579	8.25963e-05	-1.30705	4.19181	1.11338e-05
ENSG00000169679.14	BUB1	-1.18463	3.66382	8.2866e-05	-1.94696	3.52863	1.11338e-05
ENSG00000183734.4	ASCL2	1.45139	3.44536	6.52494e-05	2.00728	1.3619	1.11379e-05
ENSG00000189337.16	KAZN	-2.75827	-0.323936	0.00347369	-2.37845	1.19324	1.12367e-05
ENSG00000117399.13	CDC20	-1.75878	2.51978	0.00121053	-1.66673	2.96237	1.41017e-05
ENSG00000139734.17	DIAPH3	-1.63433	1.86212	0.0172638	-2.2577	1.85225	1.52856e-05
ENSG00000121594.11	CD80	3.10316	2.92864	2.09521e-09	1.62762	2.17225	1.60899e-05
ENSG00000169902.13	TPST1	-2.98999	2.63895	3.94285e-08	-1.56626	2.52376	1.63859e-05
ENSG00000196220.15	SRGAP3	-1.5283	2.62099	0.00418652	-1.35685	3.01323	1.77844e-05
ENSG00000104974.11	LILRA1	1.8683	1.67532	0.000764269	2.86893	0.554387	1.77967e-05
ENSG00000137807.14	KIF23	-1.16845	3.42922	0.00247928	-1.97796	3.03337	1.78799e-05
ENSG00000102362.15	SYTL4	-2.52085	1.06151	0.000284603	-2.76662	0.297208	2.12386e-05
ENSG00000073712.14	FERMT2	-1.6424	1.40794	0.0426629	-2.31399	1.44298	2.14738e-05
ENSG00000090889.11	KIF4A	-1.47866	2.56895	0.00277622	-2.36335	2.51805	2.16832e-05
ENSG00000065328.16	MCM10	-1.56357	2.76255	0.0242645	-2.02573	2.5622	2.30291e-05
ENSG00000167123.18	CERCAM	-1.21139	3.3047	0.000568009	-1.35606	2.69097	2.39929e-05
ENSG00000184661.13	CDCA2	-1.28155	2.68543	0.011816	-1.99672	2.12461	2.86215e-05
ENSG00000164850.14	GPER1	-2.09298	3.28547	0.000115058	-1.97604	1.67629	2.90356e-05
ENSG00000152217.17	SETBP1	2.96771	0.819287	2.4282e-05	2.2242	1.00288	3.06948e-05
ENSG00000126787.12	DLGAP5	-1.5883	3.70368	8.07991e-06	-2.31472	2.52312	3.36877e-05
ENSG00000166803.12	PCLAF	-1.30474	2.37929	0.0165974	-1.9806	2.78819	3.53468e-05
ENSG00000101412.12	E2F1	-1.13724	2.94518	0.031531	-1.43219	3.34544	3.59883e-05
ENSG00000275397.2	DHRS11	-1.58654	4.05194	2.3613e-08	-1.04118	3.81468	3.70178e-05
ENSG00000138160.5	KIF11	-1.02399	4.26334	9.31009e-05	-1.69124	3.42858	3.81269e-05
ENSG00000123892.11	RAB38	-1.96265	3.87277	8.4055e-11	-1.57894	2.7495	4.01559e-05
ENSG00000176890.15	TYMS	-1.45886	2.16012	0.0175747	-1.25208	4.37529	4.05999e-05
ENSG00000131153.8	GINS2	-1.42954	2.22938	0.0186459	-2.10072	2.06281	4.35887e-05
ENSG00000089685.14	BIRC5	-1.38495	3.32344	0.000825856	-2.26302	3.08251	4.4304e-05
ENSG00000123485.11	HJURP	-1.56617	2.62649	0.001627	-2.12755	2.41174	4.78488e-05
ENSG00000083857.13	FAT1	-2.4401	1.72087	0.000471035	-2.02166	1.12491	4.89536e-05
ENSG00000167588.12	GPD1	-2.63626	4.47175	4.05815e-08	-1.29122	3.59766	4.92149e-05
ENSG00000164611.12	PTTG1	-1.00658	3.60334	0.0097807	-1.32694	3.08353	5.01089e-05
ENSG00000133056.13	PIK3C2B	-1.23966	3.24432	0.00139342	-1.07375	3.69721	5.2769e-05
ENSG00000153721.18	CNKSR3	-1.82825	2.64738	5.53749e-06	-2.00127	1.37675	5.58651e-05
ENSG00000188707.5	ZBED6CL	2.51339	2.0945	5.08483e-06	1.6983	1.88423	5.714e-05
ENSG00000205221.12	VIT	-1.84061	0.747228	0.0452678	-1.83264	1.75184	5.9275e-05
ENSG00000233450.7	KIFC1	-3.9023	2.5695	0.00110876	-1.67838	3.27886	6.25288e-05
ENSG00000048342.15	CC2D2A	-1.12277	2.71935	0.0305391	-1.63078	2.01364	6.25531e-05
ENSG00000277943.4	CCL4	3.15898	3.36272	8.13889e-05	1.69841	2.57777	6.26293e-05
ENSG00000101057.15	MYBL2	-2.05818	3.53274	7.18625e-05	-2.01846	3.59091	6.58225e-05
ENSG00000169607.12	CKAP2L	-1.22812	2.55824	0.0148337	-2.08194	2.26771	7.17406e-05
ENSG00000072571.19	HMMR	-1.08149	3.39057	0.0180188	-1.76553	3.02919	7.40568e-05
ENSG00000135451.12	TROAP	-1.85775	1.47892	0.0165806	-2.40965	1.47844	7.81763e-05
ENSG00000197696.9	NMB	-1.42413	2.81726	0.00122105	-1.80777	1.6483	8.18736e-05
ENSG00000186792.16	HYAL3	-1.41923	3.69824	9.67109e-07	-1.12842	3.5918	8.82296e-05
ENSG00000007968.6	E2F2	-1.11756	3.53346	0.00465692	-1.72422	3.01447	8.88977e-05
ENSG00000175305.17	CCNE2	-1.51575	3.1599	0.00153618	-1.84677	3.12003	9.06683e-05
ENSG00000143476.17	DTL	-1.18434	3.29344	0.0138625	-1.67382	3.0397	0.000101578
ENSG00000257335.8	MGAM	1.98891	1.52359	0.0095529	2.69902	-0.325329	0.000108405
ENSG00000277773.4	SMN2	-2.02737	2.86956	0.00953136	1.66326	3.42464	0.000140773
ENSG00000164136.16	IL15	2.0873	3.08503	3.6369e-08	1.24265	2.64015	0.000142509
ENSG00000182866.16	LCK	2.06905	0.478052	0.0358963	2.57936	0.089069	0.000174172
ENSG00000169047.5	IRS1	-2.86669	3.01839	1.00603e-07	-2.32296	0.86486	0.000197004
ENSG00000196329.11	GIMAP5	2.37022	6.09151	1.63151e-12	1.01388	4.35095	0.000205524
ENSG00000184557.4	SOCS3	3.09598	4.62762	4.08428e-11	1.2331	3.36897	0.000207276
ENSG00000148516.21	ZEB1	-1.6743	1.07274	0.0189723	-1.75824	1.37763	0.00021683
ENSG00000094804.9	CDC6	-1.21552	3.03219	0.0192282	-1.53995	3.00636	0.000221116
ENSG00000112984.11	KIF20A	-1.45905	3.45692	0.000211976	-2.88251	2.67393	0.000243005
ENSG00000136286.14	MYO1G	2.76218	4.72767	1.48094e-11	1.15455	3.04429	0.00024753
ENSG00000239887.4	C1orf226	-2.96214	1.16695	0.000454793	-1.12703	3.2558	0.000252536
ENSG00000136943.10	CTSV	-2.26618	2.30512	1.86473e-05	-1.91585	1.34547	0.000256835
ENSG00000089723.9	OTUB2	-1.37071	4.30168	2.88117e-06	-1.09324	3.45533	0.000260195
ENSG00000109805.9	NCAPG	-1.5042	3.83874	0.000109992	-2.02889	3.31097	0.000284907
ENSG00000052126.14	PLEKHA5	-2.0433	3.51153	3.46357e-06	-1.8476	1.15063	0.000298169
ENSG00000073861.2	TBX21	1.42564	1.81116	0.0451027	1.72134	1.59252	0.000336331
ENSG00000275302.1	CCL4	2.32902	0.446273	0.0112216	2.35431	0.292685	0.000337167
ENSG00000126759.13	CFP	1.83512	2.20242	0.00247928	1.23415	3.17084	0.000380606
ENSG00000171320.14	ESCO2	-1.26828	3.14118	0.00620194	-1.61431	2.76887	0.000386052
ENSG00000137261.13	KIAA0319	-3.28524	0.348462	0.000604654	-1.78124	1.20804	0.000395799
ENSG00000173715.16	C11orf80	-1.39083	2.96171	0.00277622	-1.584	1.75402	0.000403351
ENSG00000118193.11	KIF14	-1.31806	3.07516	0.00256374	-2.00347	1.83363	0.000407801
ENSG00000132849.20	PATJ	-2.09362	2.41276	4.06769e-05	-1.66921	1.98485	0.000416084
ENSG00000010030.13	ETV7	6.09794	1.73412	3.31755e-17	2.19741	0.142614	0.000432896
ENSG00000106526.10	ACTR3C	2.40677	0.138969	0.00301593	2.00817	0.491996	0.000457308
ENSG00000151948.11	GLT1D1	1.43797	2.56025	0.00401407	1.44923	2.26286	0.000457308
ENSG00000081913.13	PHLPP1	-1.05455	3.88897	0.000799457	-1.10034	3.41929	0.000462825
ENSG00000135631.16	RAB11FIP5	-1.26762	1.69714	0.0461716	-1.6025	1.54786	0.000532046
ENSG00000125430.8	HS3ST3B1	2.49944	2.44437	7.17294e-05	2.03124	1.23906	0.000587033
ENSG00000175063.16	UBE2C	-1.47402	2.52665	0.0199161	-1.93651	2.13415	0.000708676
ENSG00000196664.4	TLR7	1.54209	4.32607	0.000161178	-1.10985	3.71202	0.00071736
ENSG00000179144.4	GIMAP7	1.99679	3.67412	2.46503e-09	1.0125	3.39428	0.000824954
ENSG00000160200.17	CBS	1.27102	5.11095	0.015461	1.45443	4.02211	0.000913069
ENSG00000050820.16	BCAR1	-1.81403	4.1083	0.000568009	-1.06353	3.89849	0.00098587
ENSG00000110492.15	MDK	1.35037	1.95068	0.0243897	1.11777	2.92051	0.000993762
ENSG00000070759.16	TESK2	-1.05111	3.70847	0.000607916	-1.10383	3.08235	0.0010132
ENSG00000240089.2	BMS1P3	-1.74033	0.365979	0.0394768	-2.00075	0.508263	0.00101881
ENSG00000106537.7	TSPAN13	-2.72905	2.09844	1.8034e-05	-1.93298	0.471071	0.00102129
ENSG00000188820.12	CALHM6	5.18294	3.9669	3.81786e-18	1.97397	1.29366	0.00106363
ENSG00000129173.12	E2F8	-1.57233	1.29426	0.049829	-2.04697	1.89678	0.00121302
ENSG00000117650.12	NEK2	-1.78973	2.30487	0.000552836	-2.46626	1.18719	0.00121987
ENSG00000151729.10	SLC25A4	-1.81752	0.625623	0.0381062	-1.38593	1.86043	0.00123565
ENSG00000149294.16	NCAM1	2.18705	1.22203	0.000881754	1.78254	1.54656	0.00128524
ENSG00000091129.19	NRCAM	-2.34297	1.33312	0.0050963	-1.24705	2.39226	0.00131022
ENSG00000129195.15	PIMREG	-1.49749	1.67027	0.0207931	-2.33317	1.01602	0.00146275
ENSG00000124006.14	OBSL1	-1.91066	0.772843	0.0160129	-1.43941	1.68094	0.00149831
ENSG00000102265.11	TIMP1	1.16283	4.4335	0.00017502	1.19129	6.18486	0.00150668
ENSG00000101004.14	NINL	-1.58309	2.39234	0.00169857	-1.07171	2.82867	0.00167519
ENSG00000105711.11	SCN1B	2.15144	2.69225	2.37743e-05	1.30353	1.94991	0.00178133
ENSG00000088827.12	SIGLEC1	2.21683	4.808	0.00229821	-1.90544	5.14085	0.00186192
ENSG00000153898.12	MCOLN2	2.38591	2.52172	0.000415363	1.09523	2.48169	0.00189907
ENSG00000047644.18	WWC3	2.09918	4.22012	2.81275e-07	1.14225	3.66769	0.00213255
ENSG00000171631.14	P2RY6	3.90712	2.81478	1.0284e-08	1.37419	1.7415	0.00229937
ENSG00000121895.7	TMEM156	-1.48096	2.69246	0.0114504	-1.72217	0.831144	0.00232745
ENSG00000123096.11	SSPN	1.51859	2.78984	0.00696211	1.45348	1.32556	0.00232745
ENSG00000133321.10	RARRES3	4.38609	4.35261	3.80401e-34	1.26605	2.26205	0.00243462
ENSG00000166681.13	BEX3	-2.035	3.65261	9.08171e-10	-1.57086	1.9773	0.00252436
ENSG00000103313.12	MEFV	2.21124	3.91433	2.19217e-06	1.75007	0.528134	0.00254328
ENSG00000162490.6	DRAXIN	-1.8762	2.79819	0.00196469	-1.02776	3.04911	0.00263172
ENSG00000137959.15	IFI44L	3.03424	2.86181	0.0232132	-2.41474	0.515061	0.00270824
ENSG00000160013.8	PTGIR	2.01303	2.66534	0.000690556	1.16425	2.83005	0.00279951
ENSG00000276452.4	LILRB1	1.75999	3.09387	3.05312e-07	1.18161	2.21713	0.0029724
ENSG00000080986.12	NDC80	-1.04627	2.81432	0.0211881	-1.90314	2.25999	0.00298974
ENSG00000241253.8	CFB	3.12501	-0.0955264	0.000513903	1.79073	0.500131	0.00306889
ENSG00000170891.10	CYTL1	-1.6474	3.30778	2.26161e-05	-1.44299	1.74639	0.00307084
ENSG00000128383.12	APOBEC3A	3.91792	4.6376	2.19268e-15	1.68411	3.01481	0.00317583
ENSG00000112742.9	TTK	-1.643	3.09135	0.000367102	-1.58066	2.16158	0.00342288
ENSG00000232326.9	TAP2	1.90302	2.03221	0.000105284	3.3114	2.16502	0.00373217
ENSG00000110987.8	BCL7A	-1.71876	1.54231	0.00588467	-1.45541	1.28887	0.0038753
ENSG00000182118.7	FAM89A	-1.27941	3.13382	0.00162983	-1.06503	2.76775	0.00479162
ENSG00000137411.17	VARS2	-2.30156	2.57121	0.00470793	-1.38825	2.37852	0.00529371
ENSG00000134470.20	IL15RA	3.40821	3.2521	2.19677e-19	1.00098	2.48288	0.00561509
ENSG00000243649.8	CFB	4.01089	1.02724	4.73093e-08	1.35293	1.43979	0.00637519
ENSG00000197208.5	SLC22A4	1.50417	1.81127	0.00658965	1.26332	1.3567	0.00957476
ENSG00000277401.4	TJP1	-4.09225	0.955701	0.00492792	-3.28521	1.27536	0.0105917
ENSG00000100453.12	GZMB	5.11221	-1.04412	0.00135774	1.66157	0.286086	0.0107439
ENSG00000177685.16	CRACR2B	1.23233	2.28146	0.0237982	1.20909	1.62214	0.0144027
ENSG00000172543.7	CTSW	1.40644	1.92159	0.0240828	1.69116	0.240337	0.0155586
ENSG00000139116.18	KIF21A	-2.27887	2.02849	0.0148936	-1.49247	0.515887	0.0169157
ENSG00000167676.4	PLIN4	-1.84162	1.32309	0.0166158	-1.14442	1.78222	0.0182001
ENSG00000008516.16	MMP25	2.28923	1.63275	0.00310227	1.1828	1.71667	0.0183572
ENSG00000198929.12	NOS1AP	-2.38085	-0.301765	0.0386232	-1.15438	1.6085	0.0196933
ENSG00000158485.10	CD1B	2.01622	1.24516	0.0241738	1.82237	0.878683	0.0219365
ENSG00000122035.6	RASL11A	-1.10913	2.43819	0.0189141	-1.1437	1.88026	0.0233909
ENSG00000283756.2	LO000005.1	-1.09409	2.79319	0.0103727	-1.00419	2.09974	0.0238676
ENSG00000186994.11	KANK3	-2.64195	1.24993	0.00682731	-1.42222	0.892569	0.0244825
ENSG00000147180.16	ZNF711	-2.35757	1.66814	0.00162246	-1.47999	0.197716	0.0296199
ENSG00000183087.14	GAS6	2.51859	1.76723	0.028621	1.46754	0.557	0.0307397
ENSG00000278535.4	DHRS11	-2.43237	1.40587	0.030825	-1.02728	2.07393	0.0316854
ENSG00000072071.16	ADGRL1	-2.13593	2.16714	3.34861e-05	-1.04503	1.73231	0.0318648
ENSG00000156265.15	MAP3K7CL	1.37984	2.28589	0.0075319	1.00564	1.77494	0.0356146
ENSG00000156966.6	B3GNT7	1.20011	3.29837	0.00133572	-1.17754	1.02136	0.0362058
ENSG00000180340.6	FZD2	1.87104	0.665376	0.0269751	1.35523	1.02175	0.0446146
ENSG00000205476.8	CCDC85C	-1.77323	1.39138	0.0142765	-1.21356	0.838177	0.0465097
ENSG00000071575.11	TRIB2	2.34976	-0.150382	0.0385704	1.48088	-0.331956	0.0488087
